# Supplementary material for: Photoinduced cobalt catalyzed site selective alkylation of 2-pyridones
Source: Royal Society of Chemistry journal article supplement (doi:10.1039/d3qo02133e), 2024-01-01

## Supporting Information

### Photoinduced Cobalt-Catalyzed Site Selective Alkylation of 2-Pyridones

Chenyue Li,<sup>a†</sup> Jing Li,<sup>a†</sup> Zibin Jiang,<sup>a</sup> Yiwei Xu,<sup>a</sup> Hujie Xiong,<sup>a</sup> Fei-Long Liu,<sup>c</sup>  
Tingting Liu,<sup>c\*</sup> Fei Ye,<sup>b\*</sup> Chenggui Wu<sup>a\*</sup>

<sup>a</sup>Key Laboratory of Xin'an Medicine, Ministry of Education, Anhui University of Chinese Medicine,  
Hefei, Anhui 230038, China

<sup>b</sup>CCNU-uOttawa Joint Research Centre, Key Laboratory of Pesticide & Chemical Biology, Ministry of  
Education, College of Chemistry, Central China Normal University, 152 Luoyu Road, Wuhan, Hubei  
430079.

<sup>c</sup>School of Pharmacy, the First Affiliated Hospital of Anhui Medical University, Anhui Medical  
University, Hefei, Anhui 230022, China.

† C. Li and J. Li contributed equally to this work.

\*E-mail: [cgwu@ahtcm.edu.cn](mailto:cgwu@ahtcm.edu.cn); [yef@mail.ccnu.edu.cn](mailto:yef@mail.ccnu.edu.cn); [908810474@qq.com](mailto:908810474@qq.com).

## Table of Contents

|                                                                                      |    |
|--------------------------------------------------------------------------------------|----|
| 1. General principles .....                                                          | 3  |
| 2. Optimization of reaction conditions.....                                          | 4  |
| 3. Substrates and catalysts involved in this work.....                               | 6  |
| 4. Synthesis and Characterization of material.....                                   | 9  |
| 5. Experimental procedure and characterization for the synthesis .....               | 20 |
| 7. Experimental procedure and characterization of radical trapping experiments ..... | 35 |
| 8. Experimental procedure and characterization of synthetic applications .....       | 36 |
| 9. References.....                                                                   | 40 |

## 1. General principles

All reactions dealing with air- or moisture-sensitive compound were performed by standard Schlenk techniques in oven-dried reaction vessels Under the argon atmosphere or in the argon-filled glove box. Unless otherwise noted, all solvents were dried by JC Meyer Solvent Drying System. Most reagents were purchased from commercial sources and used without further purification, unless otherwise stated. Reactions were monitored by thin layer chromatography (TLC) carried out on 0.2 mm commercial silica gel plates, using UV light as the visualizing agent or basic solution of KMnO<sub>4</sub> or acidic solution of *p*-anisaldehyde and heat as a developing agent. All NMR spectra were recorded on a Bruker spectrometer at 600 MHz (<sup>1</sup>H NMR), 100 MHz (<sup>13</sup>C NMR), 565 MHz (<sup>19</sup>F NMR) and were calibrated using residual undeuterated solvent as an internal reference (CDCl<sub>3</sub> @ 7.26 ppm <sup>1</sup>H NMR, 77.16 ppm <sup>13</sup>C NMR; DMSO @ 2.50 ppm <sup>1</sup>H NMR, 39.5 ppm <sup>13</sup>C NMR; CD<sub>3</sub>OD @ 3.30 ppm <sup>1</sup>H NMR, 49.00 ppm <sup>13</sup>C NMR). The following abbreviations were used to explain multiplicities: s = singlet, d = doublet, t = triplet, q = quartet, dd = doublet of doublets, dt = doublet of triplets, td = triplet of doublets, ddd = doublet of doublet of doublets, m = multiplet, br = broad. High resolution mass spectra (HRMS) were recorded on DIONEX UltiMate 3000 & Bruker Compact TOF mass spectrometer.

## 2. Optimization of reaction conditions

Table S1 Reaction conditions optimization for C3 alkylation of 2-pyridones

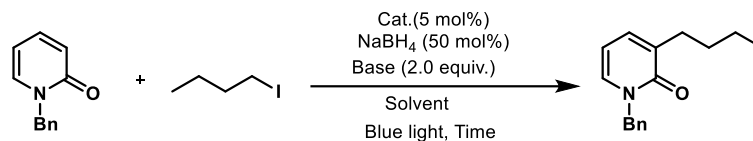

| Entry     | Solvent              | Base                            | Cat.        | T/h       | Yield [%] |
|-----------|----------------------|---------------------------------|-------------|-----------|-----------|
| 1         | PhCl                 | Barton's base                   | Co-I        | 24        | trace     |
| 2         | MeOH                 | Barton's base                   | Co-I        | 24        | 29        |
| 3         | THF                  | Barton's base                   | Co-I        | 24        | trace     |
| 4         | DME                  | Barton's base                   | Co-I        | 24        | trace     |
| 5         | Dioxane              | Barton's base                   | Co-I        | 24        | trace     |
| 6         | <i>o</i> -Xylene     | Barton's base                   | Co-I        | 24        | trace     |
| 7         | <i>n</i> -BuOH       | Barton's base                   | Co-I        | 24        | 48        |
| 8         | <i>n</i> -BuOH       | Cs <sub>2</sub> CO <sub>3</sub> | Co-I        | 24        | 42        |
| 9         | <i>n</i> -BuOH       | TEA                             | Co-I        | 24        | trace     |
| 10        | <i>n</i> -BuOH       | CaCO <sub>3</sub>               | Co-I        | 24        | 36        |
| 11        | <i>n</i> -BuOH       | CsF                             | Co-I        | 24        | 66        |
| 12        | <i>n</i> -BuOH       | CsF                             | Co-III      | 24        | 36        |
| 13        | <i>n</i> -BuOH       | CsF                             | Co-IV       | 24        | 36        |
| <b>14</b> | <b><i>n</i>-BuOH</b> | <b>CsF</b>                      | <b>Co-I</b> | <b>36</b> | <b>74</b> |

[a] The reaction was performed on a 0.2 mmol scale. [b] Isolated yield in parentheses.

**Table S2 Reaction conditions optimization for C6 alkylation of 2-pyridones**

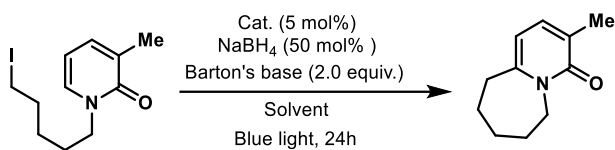

| Entry | Cat.   | solvent | 2A Yield [%] |
|-------|--------|---------|--------------|
| 1     | Co-I   | PhCl    | 38           |
| 2     | Co-II  | PhCl    | 75           |
| 3     | Co-III | PhCl    | trace        |
| 4     | Co-IV  | PhCl    | 17           |
| 5     | Co-II  | Acetone | trace        |
| 6     | Co-II  | DCE     | trace        |
| 7     | Co-II  | MeCN    | trace        |
| 8     | Co-II  | DMF     | trace        |
| 9     | Co-II  | PhMe    | 60           |
| 10    | Co-II  | Dioxane | 57           |

[a] The reaction was performed on a 0.1 mmol scale. [b] Isolated yield in parentheses.

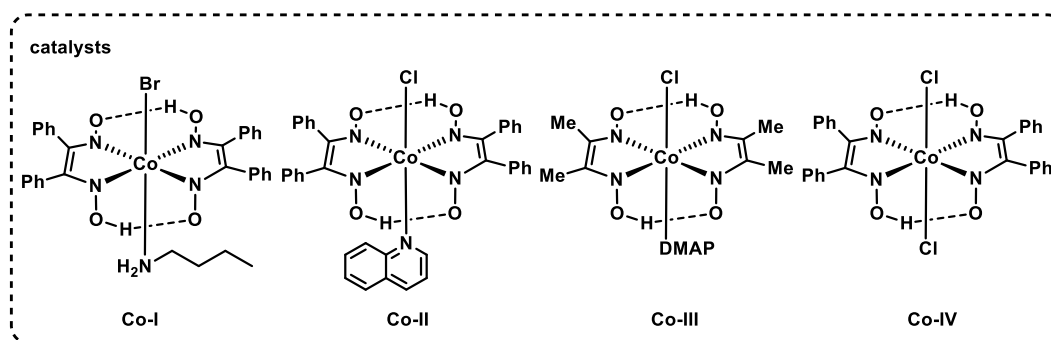

### 3. Substrates and catalysts involved in this work

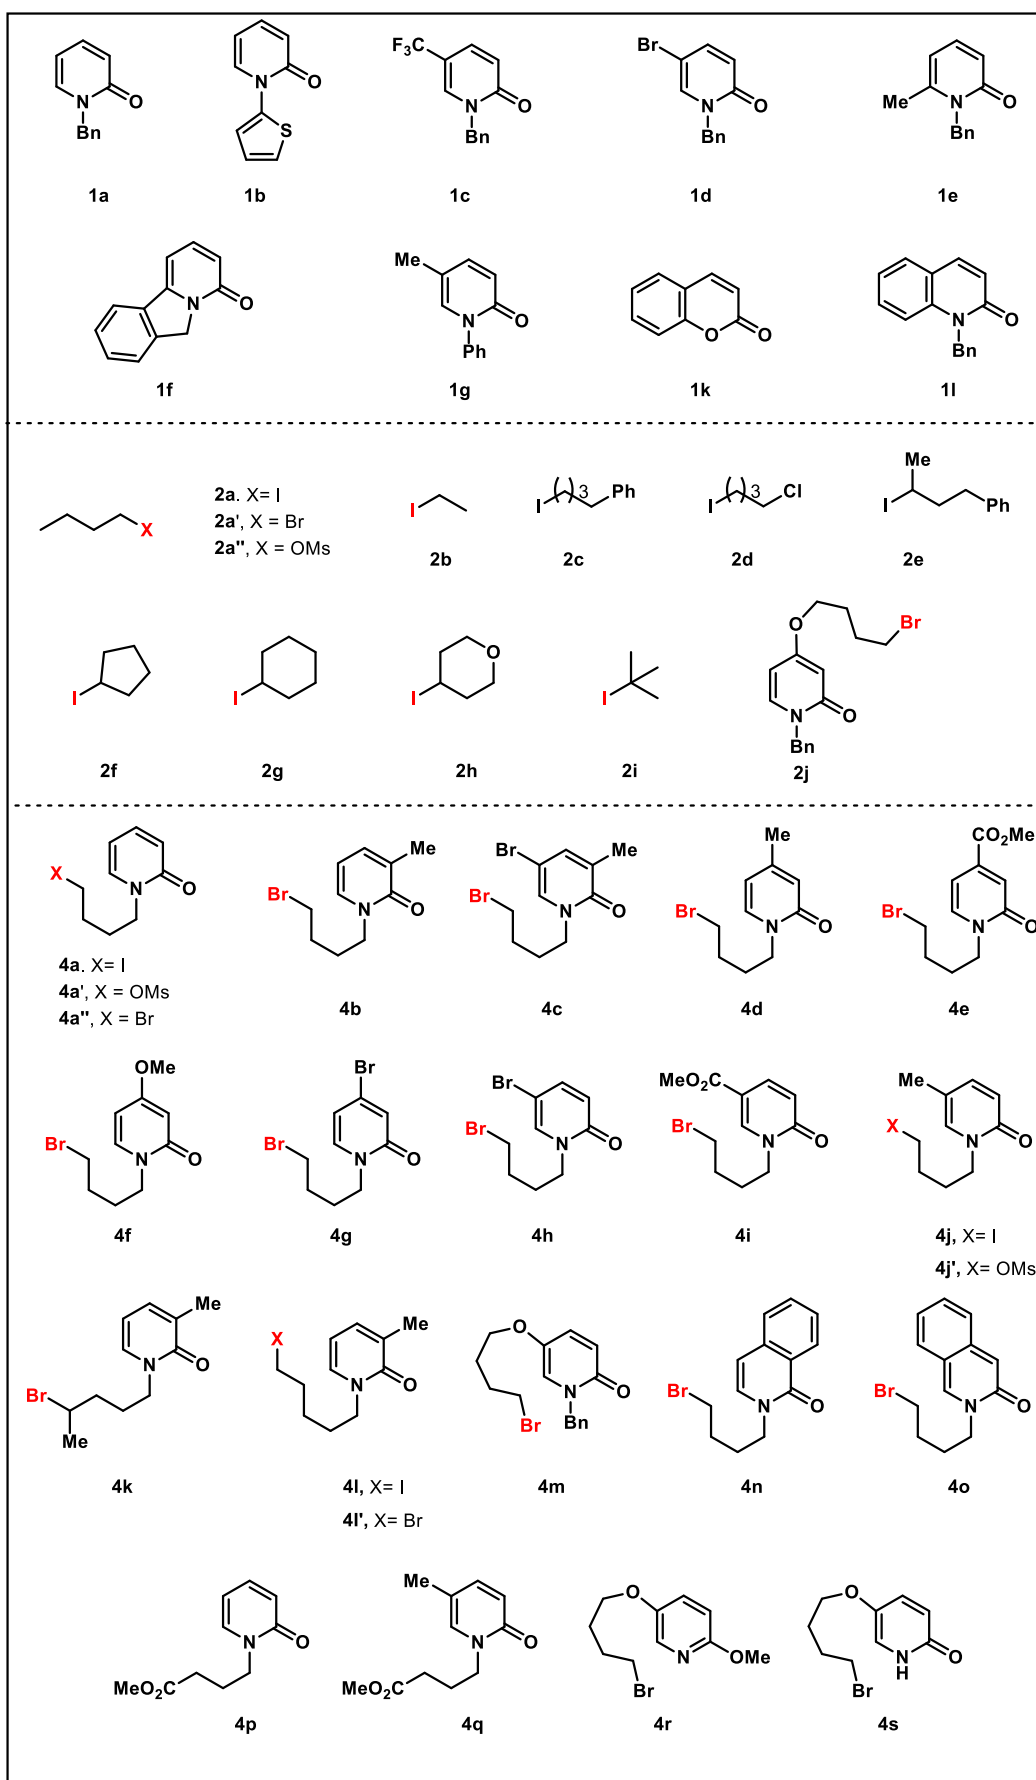

Substrates **2a**, **2a''**, **2b**, **2d** and **2f-2i** were commercially available and were used without further purification. Substrates **2c**, **2e** and **1a-1l** were known compounds and prepared according to the reported literatures.<sup>[1-10]</sup> Substrates **4a-q** are not known compounds, prepared with reference to other literatures.<sup>[11-17]</sup>

### Synthesis and characterization of Co(*n*-butylamine)(dmgH)<sub>2</sub>Br (Co-I)

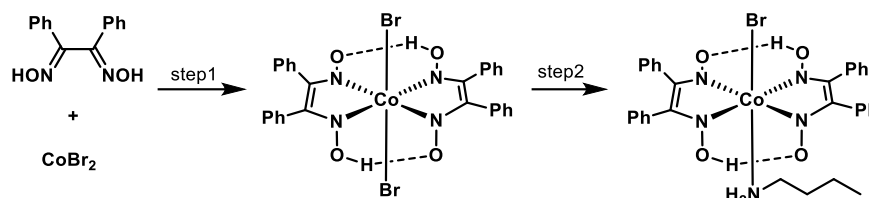

**Step 1:** In air, to a 150 mL round flask charged with CoBr<sub>2</sub> (2.187 g, 10 mmol, 1.0 equiv.) and acetone (50 mL, c = 0.2 M) was added 1,2-diphenylethane-1,2-dione dioxime (5.282 g, 22 mmol, 2.2 equiv.). A gentle stream of air was passed through the solution *via* a needle. After 1h, the reaction flask was placed on ice for 20min. The resulting brown solids were collected by filtration over Büchner funnel. The solids were rinsed with cold acetone and further dried (19%).

**Step 2:** Then the brown solid (2.084 g, 3 mmol, 1.0 equiv.) was placed in MeOH (25 mL, c = 0.12 M), then *n*-butylamine (0.439 g, 6 mmol, 2.0 equiv.) was added. The mixture was stirred for 30min at room temperature. Then water (42 mL) was added, and the flask was placed on ice for 10min. Filter the mixture and get the brown solid (94%).

**Physical state:** Brown solid;

**R<sub>f</sub>** = 0.4 (silica gel, DCM: MeOH = 20:1);

**<sup>1</sup>H NMR** (600 MHz, CDCl<sub>3</sub>, 23°C, δ): 7.41 – 7.34 (m, 12H), 7.28 (dd, *J* = 6.7, 3.2 Hz, 8H), 3.54 (t, *J* = 7.1 Hz, 2H), 2.02 – 1.94 (m, 2H), 1.52 – 1.42 (m, 2H), 1.22 – 1.11 (m, 2H), 0.78 (t, *J* = 7.3 Hz, 3H) ppm.

**<sup>13</sup>C NMR** (100 MHz, CDCl<sub>3</sub>, 23°C, δ): 152.7, 130.0, 129.7, 129.4, 127.9, 31.5, 20.0, 13.6 ppm.

**HRMS-ESI (m/z)** calc'd for C<sub>33</sub>H<sub>36</sub>BrCoN<sub>5</sub>NaO<sub>4</sub> [M+Na]<sup>+</sup>, 712.0937, found, 712.0940.

### Synthesis and characterization of Co(quinoline)(dmgH)<sub>2</sub>Cl (Co-II)

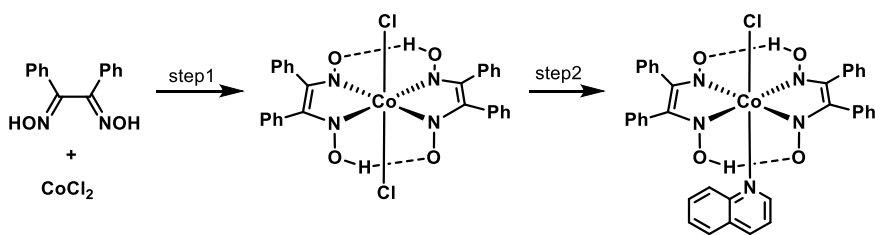

**Step 1:** In air, to a 150 mL round flask charged with  $\text{CoCl}_2$  (1.298 g, 10 mmol, 1.0 equiv.) and acetone (50 mL,  $c = 0.2$  M) was added 1,2-diphenylethane-1,2-dione dioxime (5.282 g, 22 mmol, 2.2 equiv.). A gentle stream of air was passed through the solution via a needle. After 1h, the reaction flask was placed on ice for 20min. The resulting brown solid were collected by filtration over Büchner funnel. The solid were rinsed with cold acetone and further dried (89%).

**Step 2:** Then the brown solid (1.821 g, 3 mmol, 1.0 equiv.) were placed in MeOH (25 mL,  $c = 0.12$  M), then quinoline (0.774 g, 6 mmol, 2.0 equiv.) was added. The mixture was stirred for 30min at room temperature. Then water (42 mL) was added, and the flask was placed on ice for 10 min. Filter the mixture and get the brown solid (82%).

**Physical state:** Brown solid;

$R_f = 0.3$  (silica gel, DCM: MeOH = 20:1);

$^1\text{H NMR}$  (600 MHz, DMSO, 23°C,  $\delta$ ): 9.05 (s, 1H), 8.65 (s, 1H), 8.13 – 8.06 (m, 2H), 7.89 (t,  $J = 7.6$  Hz, 1H), 7.72 (t,  $J = 7.2$  Hz, 2H), 7.38 – 7.19 (m, 20H) ppm.

$^{13}\text{C NMR}$  (100 MHz, DMSO, 23°C,  $\delta$ ): 152.2, 149.9, 148.3, 144.1, 138.5, 130.4, 129.9, 129.0, 128.9, 128.9, 128.2, 127.8, 127.4, 127.3, 127.2, 126.9, 126.8, 125.9, 121.0 ppm.

**HRMS-ESI ( $m/z$ )** calc'd for  $\text{C}_{37}\text{H}_{29}\text{ClCoN}_5\text{NaO}_4$  [ $\text{M}+\text{Na}$ ] $^+$ , 724.1132; found, 724.1132.

### Synthesis and characterization of $\text{Co}(\text{DMAP})(\text{dmgH})_2\text{Cl}$ (Co-III)

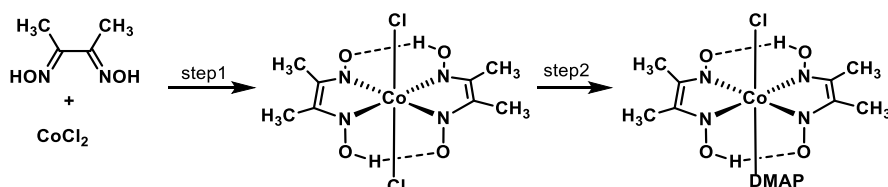

**Step 1:** In air, to a 150 mL round flask charged with  $\text{CoCl}_2$  (1.298 g, 10 mmol, 1.0 equiv.) and acetone (50 mL,  $c = 0.2$  M) was added dimethylglyoxime (2.552 g, 22 mmol, 2.2 equiv.). A gentle stream of air was passed through the solution via a needle. After 1h, the reaction flask was placed on ice for 20min. The resulting green crystals were collected by filtration over Büchner funnel. The crystals were rinsed with cold acetone



and further dried (2.55 g, 71%).

**Step 2:** Then the green crystals (1.082 g, 3 mmol, 1.0 equiv.) were placed in MeOH (25 mL,  $c = 0.12$  M), and DMAP (0.732 g, 6 mmol, 2.0 equiv.) was added. The mixture was stirred for 30 min at room temperature. Then water (42 mL) was added, and the flask was placed on ice for 10 min. Filter the mixture and get the brown crystals (1.31 g, 98%).

**Physical state:** Brown solid;

$R_f = 0.3$  (silica gel, DCM: MeOH = 20:1);

$^1\text{H NMR}$  (600 MHz, DMSO, 23°C,  $\delta$ ): 7.35 (d,  $J = 7.3$  Hz, 2H), 6.59 – 6.57 (m, 2H), 2.91 (s, 6H), 2.30 (s, 12H) ppm.

$^{13}\text{C NMR}$  (100 MHz, DMSO, 23°C,  $\delta$ ): 154.4, 151.8, 147.6, 108.6, 38.6, 12.4 ppm.

**HRMS-ESI (m/z)** calc'd for  $\text{C}_9\text{H}_{17}\text{ClCoN}_4\text{NaO}_4$   $[\text{M}+\text{Na}]^+$ , 362.9265; found, 362.9263.

#### 4. Synthesis and Characterization of material

##### Synthesis of material (1)<sup>[11],[12]</sup>

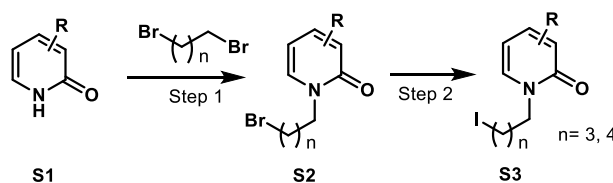

**Step 1:** 500 mg of **S1** was dissolved in 3 mL DMF. NaH (1.1 equiv.) was added to DMF to form a suspension and slowly added dropwise at 0 °C for 30 minutes. Alkyl halide (1.5 equiv.) was added and the resulting mixture was stirred overnight at room temperature. 20 mL water was added to the mixture and then the mixture was extracted with  $\text{CH}_2\text{Cl}_2$  (50 mL x 3), an organic layer washed with water (50 mL), dried over  $\text{Na}_2\text{SO}_4$ , and concentrated in vacuo to afford the compound **S2**.

**Step 2:** **S2** and NaI (6.0 equiv.) was dissolved in 3 mL acetone. The resulting mixture was stirred overnight at 70°C. 20 mL water was added to the mixture and then the mixture was extracted with  $\text{CH}_2\text{Cl}_2$  (50 mL x 3), an organic layer washed with water (50 mL), dried over  $\text{Na}_2\text{SO}_4$ , and concentrated in vacuo to afford the compounds **S3**.

##### 1-(4-Iodobutyl)pyridin-2(1H)-one (**4a**)

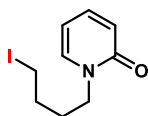

**Physical state:** yellow oil;

$R_f$  = 0.4 (silica gel, PE: EtOAc = 1:1, v/v);

$^1\text{H NMR}$  (600 MHz,  $\text{CDCl}_3$ , 23°C,  $\delta$ ): 7.33 (ddd,  $J$  = 8.9, 6.5, 2.0 Hz, 1H), 7.29 (d,  $J$  = 6.0 Hz, 1H), 6.55 (d,  $J$  = 9.1 Hz, 1H), 6.19 (t,  $J$  = 6.7 Hz, 1H), 3.96 (t,  $J$  = 6.6 Hz, 2H), 3.22 (t,  $J$  = 6.2 Hz, 2H), 1.88 (p,  $J$  = 3.4 Hz, 4H) ppm.

$^{13}\text{C NMR}$  (100 MHz,  $\text{CDCl}_3$ , 23°C,  $\delta$ ): 162.4, 139.4, 137.3, 120.9, 106.1, 48.3, 30.2, 30.1, 5.8 ppm.

HRMS-ESI ( $m/z$ ) calc'd for  $\text{C}_9\text{H}_{13}\text{INO}$   $[\text{M}+\text{H}]^+$ , 278.0036; found, 278.0036.

#### 1-(4-Bromobutyl)pyridin-2(1H)-one (4a'')

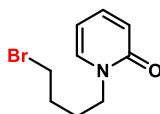

Physical state: yellow oil;

$R_f$  = 0.4 (silica gel, PE: EtOAc = 1:1, v/v);

$^1\text{H NMR}$  (600 MHz,  $\text{CDCl}_3$ , 23°C,  $\delta$ ): 7.34 – 7.30 (m, 1H), 7.26 (d,  $J$  = 8.4 Hz, 1H), 6.56 (d,  $J$  = 9.2 Hz, 1H), 6.17 (t,  $J$  = 6.8 Hz, 1H), 3.97 (t,  $J$  = 6.1 Hz, 2H), 3.45 (t,  $J$  = 5.9 Hz, 2H), 1.92 (p,  $J$  = 3.1 Hz, 4H) ppm.

$^{13}\text{C NMR}$  (100 MHz,  $\text{CDCl}_3$ , 23°C,  $\delta$ ): 162.7, 139.5, 137.4, 121.3, 106.3, 48.8, 33.1, 29.7, 28.1 ppm.

HRMS-ESI ( $m/z$ ) calc'd for  $\text{C}_9\text{H}_{12}\text{BrNNaO}$   $[\text{M}+\text{Na}]^+$ , 251.9995; found, 251.9994.

#### 5-Bromo-1-(4-bromobutyl)-3-methylpyridin-2(1H)-one (4b)

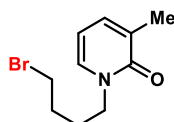

Physical state: yellow oil;

$R_f$  = 0.5 (silica gel, PE: EtOAc = 2:1, v/v);

$^1\text{H NMR}$  (600 MHz,  $\text{CDCl}_3$ , 23°C,  $\delta$ ): 7.11 (d,  $J$  = 6.4 Hz, 1H), 7.07 (d,  $J$  = 6.7 Hz, 1H), 6.02 (t,  $J$  = 6.8 Hz, 1H), 3.89 (d,  $J$  = 6.5 Hz, 2H), 3.38 – 3.32 (m, 2H), 2.05 (d,  $J$  = 1.4 Hz, 3H), 1.82 (p,  $J$  = 3.1 Hz, 4H) ppm.

$^{13}\text{C NMR}$  (100 MHz,  $\text{CDCl}_3$ , 23°C,  $\delta$ ): 162.8, 136.6, 134.6, 129.8, 105.7, 48.7, 32.9, 29.6, 27.8, 17.1 ppm.

HRMS-ESI ( $m/z$ ) calc'd for  $\text{C}_{10}\text{H}_{15}\text{BrNO}$   $[\text{M}+\text{H}]^+$ , 244.0331; found, 244.0332.

### 5-Bromo-1-(4-bromobutyl)-3-methylpyridin-2(1H)-one (4c)

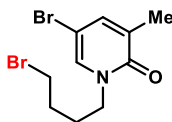

**Physical state:** yellow oil;

$R_f$  = 0.5 (silica gel, PE: EtOAc = 2:1, v/v);

$^1\text{H NMR}$  (600 MHz,  $\text{CDCl}_3$ , 23°C,  $\delta$ ): 7.28 (s, 1H), 7.26 (s, 1H), 3.95 – 3.93 (m, 2H), 3.46 – 3.44 (m, 2H), 2.14 (d,  $J$  = 1.2 Hz, 3H), 1.92 – 1.90 (m, 4H) ppm.

$^{13}\text{C NMR}$  (100 MHz,  $\text{CDCl}_3$ , 23°C,  $\delta$ ): 161.6, 139.6, 134.5, 131.9, 97.8, 49.2, 32.9, 29.7, 28.0, 17.4 ppm.

**HRMS-ESI (m/z)** calc'd for  $\text{C}_{10}\text{H}_{14}\text{Br}_2\text{NO}$   $[\text{M}+\text{H}]^+$ , 321.9436; found, 321.9437.

### 1-(4-Bromobutyl)-4-methylpyridin-2(1H)-one (4d)

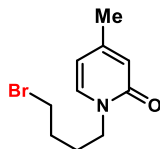

**Physical state:** yellow oil;

$R_f$  = 0.5 (silica gel, PE: EtOAc = 2:1, v/v);

$^1\text{H NMR}$  (600 MHz,  $\text{CDCl}_3$ , 23°C,  $\delta$ ) 7.11 (d,  $J$  = 6.9 Hz, 1H), 6.35 (s, 1H), 6.01 (dd,  $J$  = 7.0, 1.9 Hz, 1H), 3.90 (d,  $J$  = 5.5 Hz, 2H), 3.20 – 3.18 (m, 2H), 2.15 (s, 3H), 1.85 – 1.83 (m, 4H) ppm.

$^{13}\text{C NMR}$  (100 MHz,  $\text{CDCl}_3$ , 23°C,  $\delta$ ): 162.7, 151.2, 136.3, 119.6, 108.8, 48.1, 30.4, 21.3, 5.9 ppm.

**HRMS-ESI (m/z)** calc'd for  $\text{C}_{10}\text{H}_{15}\text{BrNO}$   $[\text{M}+\text{H}]^+$ , 244.0331; found, 244.0332.

### Methyl 1-(4-bromobutyl)-2-oxo-1,2-dihydropyridine-4-carboxylate (4e)

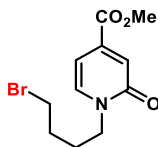

**Physical state:** white solid;

**Melting point:** 82°C;

$R_f$  = 0.3 (silica gel, PE: EtOAc = 1:1, v/v);

**<sup>1</sup>H NMR** (600 MHz, CDCl<sub>3</sub>, 23°C, δ): 7.32 (d, *J* = 6.6 Hz, 1H), 7.17 (d, *J* = 1.8 Hz, 1H), 6.65 (dd, *J* = 7.0, 1.9 Hz, 1H), 3.98 – 3.94 (m, 2H), 3.89 (s, 3H), 3.42 (t, *J* = 6.0 Hz, 2H), 1.93 – 1.89 (m, 4H) ppm.

**<sup>13</sup>C NMR** (100 MHz, CDCl<sub>3</sub>, 23°C, δ): 165.1, 162.3, 140.6, 137.8, 122.9, 104.7, 52.9, 49.0, 32.8, 29.6, 27.9 ppm.

**HRMS-ESI (m/z)** calc'd for C<sub>11</sub>H<sub>15</sub>NO [M+H]<sup>+</sup>, 288.0229; found, 288.0230.

#### 1-(4-Bromobutyl)-4-methoxypyridin-2(1*H*)-one (4f)

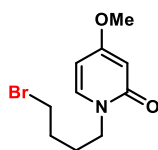

**Physical state:** yellow oil;

**R<sub>f</sub>** = 0.3 (silica gel, PE: EtOAc = 2:1, v/v);

**<sup>1</sup>H NMR** (600 MHz, CDCl<sub>3</sub>, 23°C, δ): 7.09 (d, *J* = 7.4 Hz, 1H), 5.90 (dd, *J* = 7.4, 2.6 Hz, 1H), 5.88 (d, *J* = 2.7 Hz, 1H), 3.89 (t, *J* = 6.6 Hz, 2H), 3.75 (s, 3H), 3.44 – 3.42 (m, 2H), 1.89 – 1.86 (m, 4H) ppm.

**<sup>13</sup>C NMR** (100 MHz, CDCl<sub>3</sub>, 23°C, δ): 168.1, 164.2, 137.2, 101.1, 97.5, 55.6, 47.9, 33.1, 29.7, 28.2 ppm.

**HRMS-ESI (m/z)** calc'd for C<sub>10</sub>H<sub>15</sub>BrNO<sub>2</sub> [M+H]<sup>+</sup>, 260.0281; found, 260.0281.

#### 4-Bromo-1-(4-bromobutyl)pyridin-2(1*H*)-one (4g)

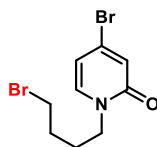

**Physical state:** yellow oil;

**R<sub>f</sub>** = 0.5 (silica gel, PE: EtOAc = 1:1, v/v);

**<sup>1</sup>H NMR** (600 MHz, CDCl<sub>3</sub>, 23°C, δ): 7.10 (d, *J* = 7.3 Hz, 1H), 6.71 (d, *J* = 2.2 Hz, 1H), 6.27 (dd, *J* = 7.3, 2.2 Hz, 1H), 3.86 – 3.83 (m, 2H), 3.35 (t, *J* = 3.5 Hz, 2H), 1.81 (q, *J* = 3.5 Hz, 4H) ppm.

**<sup>13</sup>C NMR** (100 MHz, CDCl<sub>3</sub>, 23°C, δ): 161.2, 137.2, 135.3, 122.9, 110.4, 48.4, 32.8, 29.4, 27.7 ppm.

**HRMS-ESI (m/z)** calc'd for C<sub>9</sub>H<sub>12</sub>Br<sub>2</sub>NO [M+H]<sup>+</sup>, 307.9276; found, 307.9280.

#### 5-Bromo-1-(4-bromobutyl)pyridin-2(1*H*)-one (4h)

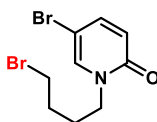

**Physical state:** yellow oil;

$R_f$  = 0.5 (silica gel, PE: EtOAc = 1:1, v/v);

$^1\text{H NMR}$  (600 MHz,  $\text{CDCl}_3$ , 23°C,  $\delta$ ): 7.37 (t,  $J$  = 2.1 Hz, 1H), 7.32 (d,  $J$  = 9.6 Hz, 1H), 6.46 (dd,  $J$  = 9.6, 5.4 Hz, 1H), 3.91 (t,  $J$  = 3.6 Hz, 2H), 3.42 – 3.41 (m, 2H), 1.89 (dd,  $J$  = 5.7, 3.1 Hz, 4H) ppm.

$^{13}\text{C NMR}$  (100 MHz,  $\text{CDCl}_3$ , 23°C,  $\delta$ ): 161.1, 142.5, 137.2, 122.4, 98.1, 49.0, 32.8, 29.5, 28.0 ppm.

**HRMS-ESI (m/z)** calc'd for  $\text{C}_9\text{H}_{12}\text{Br}_2\text{NO}$   $[\text{M}+\text{H}]^+$ , 307.9276; found, 307.9280.

#### Methyl 1-(4-bromobutyl)-6-oxo-1,6-dihydropyridine-3-carboxylate (4i)

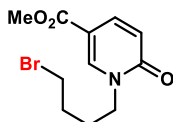

**Physical state:** white solid;

**Melting point:** 74°C;

$R_f$  = 0.3 (silica gel, PE: EtOAc = 1:1, v/v);

$^1\text{H NMR}$  (600 MHz,  $\text{CDCl}_3$ , 23°C,  $\delta$ ): 8.14 (d,  $J$  = 2.5 Hz, 1H), 7.82 (dd,  $J$  = 9.5, 2.5 Hz, 1H), 6.52 (d,  $J$  = 9.5 Hz, 1H), 3.99 (t,  $J$  = 6.8 Hz, 2H), 3.85 (s, 3H), 3.43 (t,  $J$  = 6.1 Hz, 2H), 1.92 (dh,  $J$  = 8.1, 3.7 Hz, 4H) ppm.

$^{13}\text{C NMR}$  (100 MHz,  $\text{CDCl}_3$ , 23°C,  $\delta$ ): 164.8, 162.5, 142.7, 138.6, 120.0, 110.1, 52.2, 49.5, 32.7, 29.6, 28.1 ppm.

**HRMS-ESI (m/z)** calc'd for  $\text{C}_{11}\text{H}_{14}\text{BrNNaO}_3$   $[\text{M}+\text{Na}]^+$ , 310.0051; found, 310.0049.

#### 1-(4-Iodobutyl)-5-methylpyridin-2(1H)-one (4j)

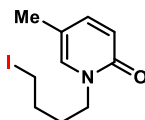

**Physical state:** yellow oil;

$R_f$  = 0.3 (silica gel, PE: EtOAc = 2:1, v/v);

$^1\text{H NMR}$  (600 MHz,  $\text{CDCl}_3$ , 23°C,  $\delta$ ): 7.16 (dd,  $J$  = 9.2, 2.6 Hz, 1H), 7.00 (s, 1H), 6.49 (d,  $J$  = 9.2 Hz, 1H), 3.92 – 3.89 (m, 2H), 3.20 (d,  $J$  = 6.8 Hz, 2H), 2.07 (s, 3H), 1.85 (p,  $J$  = 3.4 Hz, 4H) ppm.

$^{13}\text{C}$  NMR (100 MHz,  $\text{CDCl}_3$ ,  $23^\circ\text{C}$ ,  $\delta$ ): 162.0, 142.1, 134.8, 120.9, 115.2, 48.4, 30.4, 17.2, 6.0 ppm.

HRMS-ESI ( $m/z$ ) calc'd for  $\text{C}_{10}\text{H}_{14}\text{NNaO}$  [ $\text{M}+\text{Na}$ ] $^+$ , 314.0010; found, 314.0012.

#### 1-(4-Bromopentyl)-3-methylpyridin-2(1H)-one (4k)

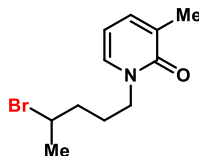

**Physical state:** yellow oil;

$R_f$  = 0.5 (silica gel, PE: EtOAc = 2:1, v/v);

$^1\text{H}$  NMR (600 MHz,  $\text{CDCl}_3$ ,  $23^\circ\text{C}$ ,  $\delta$ ): 7.12 (d,  $J$  = 6.9 Hz, 1H), 7.09 – 7.07 (m, 2H), 6.02 (dd,  $J$  = 8.0, 6.0 Hz, 1H), 4.09 – 4.05 (m, 1H), 3.92 (dq,  $J$  = 12.1, 5.1 Hz, 1H), 3.88 – 3.83 (m, 1H), 2.07 – 2.05 (m, 3H), 1.94 – 1.87 (m, 1H), 1.84 – 1.79 (m, 1H), 1.79 – 1.72 (m, 2H), 1.63 – 1.61 (m, 3H) ppm.

$^{13}\text{C}$  NMR (100 MHz,  $\text{CDCl}_3$ ,  $23^\circ\text{C}$ ,  $\delta$ ): 162.7, 105.6, 136.5, 134.6, 129.7, 50.7, 48.8, 37.7, 27.5, 26.3, 17.1 ppm.

HRMS-ESI ( $m/z$ ) calc'd for  $\text{C}_{11}\text{H}_{16}\text{BrNNaO}$  [ $\text{M}+\text{Na}$ ] $^+$ , 280.0311; found 280.0307.

#### 1-(5-Iodopentyl)-3-methylpyridin-2(1H)-one (4l)

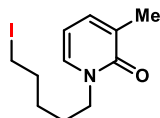

**Physical state:** yellow oil;

$R_f$  = 0.5 (silica gel, PE: EtOAc = 2:1, v/v);

$^1\text{H}$  NMR (600 MHz,  $\text{CDCl}_3$ ,  $23^\circ\text{C}$ ,  $\delta$ ): 7.19 – 7.15 (m, 1H), 7.12 (dd,  $J$  = 6.8, 2.0 Hz, 1H), 6.07 (t,  $J$  = 6.7 Hz, 1H), 3.91 (t,  $J$  = 7.4 Hz, 2H), 3.17 (t,  $J$  = 6.9 Hz, 2H), 2.12 (s, 3H), 1.84 (p,  $J$  = 7.0 Hz, 2H), 1.75 (p,  $J$  = 7.6 Hz, 2H), 1.44 (qd,  $J$  = 9.0, 6.2 Hz, 2H) ppm.

$^{13}\text{C}$  NMR (100 MHz,  $\text{CDCl}_3$ ,  $23^\circ\text{C}$ ,  $\delta$ ): 163.0, 136.7, 134.9, 130.1, 105.7, 49.9, 33.0, 28.2, 27.6, 17.4, 6.7 ppm.

HRMS-ESI ( $m/z$ ) calc'd for  $\text{C}_{11}\text{H}_{17}\text{INO}$  [ $\text{M}+\text{H}$ ] $^+$ , 306.0346; found, 306.0349.

#### 1-(5-Bromopentyl)-3-methylpyridin-2(1H)-one (4l')

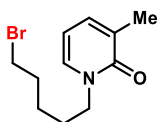

**Physical state:** yellow oil;

$R_f$  = 0.5 (silica gel, PE: EtOAc = 2:1, v/v);

$^1\text{H NMR}$  (600 MHz,  $\text{CDCl}_3$ , 23°C,  $\delta$ ): 7.17 (d,  $J$  = 6.3 Hz, 1H), 7.12 (d,  $J$  = 6.2 Hz, 1H), 6.07 (t,  $J$  = 6.7 Hz, 1H), 3.92 (t,  $J$  = 7.4 Hz, 2H), 3.39 (t,  $J$  = 6.7 Hz, 2H), 2.13 (s, 3H), 1.91 – 1.86 (m, 2H), 1.77 (p,  $J$  = 7.7 Hz, 2H), 1.49 (p,  $J$  = 7.6 Hz, 2H) ppm.

$^{13}\text{C NMR}$  (100 MHz,  $\text{CDCl}_3$ , 23°C,  $\delta$ ): 163.0, 136.7, 134.9, 130.1, 105.7, 50.0, 33.6, 32.3, 28.4, 25.3, 17.4 ppm.

**HRMS-ESI (m/z)** calc'd for  $\text{C}_{11}\text{H}_{17}\text{BrNO}$   $[\text{M}+\text{H}]^+$ , 258.0478; found, 258.0488.

#### 2-(4-Bromobutyl)isoquinolin-1(2H)-one (4n)

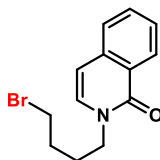

**Physical state:** yellow oil;

$R_f$  = 0.3 (silica gel, PE: EtOAc = 5:1, v/v);

$^1\text{H NMR}$  (600 MHz,  $\text{CDCl}_3$ , 23°C,  $\delta$ ): 8.42 (d,  $J$  = 8.0 Hz, 1H), 7.63 (t,  $J$  = 7.1 Hz, 1H), 7.52 – 7.47 (m, 2H), 7.06 (d,  $J$  = 7.3 Hz, 1H), 6.51 (d,  $J$  = 7.3 Hz, 1H), 4.07 – 4.03 (m, 2H), 3.45 (t,  $J$  = 6.1 Hz, 2H), 1.95 (q,  $J$  = 4.1 Hz, 4H) ppm.

$^{13}\text{C NMR}$  (100 MHz,  $\text{CDCl}_3$ , 23°C,  $\delta$ ): 162.3, 137.1, 132.3, 131.5, 128.0, 127.0, 126.4, 126.0, 106.4, 48.3, 33.2, 29.8, 28.1 ppm.

**HRMS-ESI (m/z)** calc'd for  $\text{C}_{13}\text{H}_{15}\text{BrNO}$   $[\text{M}+\text{H}]^+$ , 280.0322; found, 280.0305.

#### 2-(4-Bromobutyl)isoquinolin-3(2H)-one (4o)

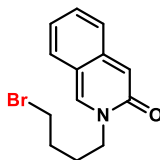

**Physical state:** White solid;

**Melting point:** 77°C;

$R_f$  = 0.5 (silica gel, PE: EtOAc = 2:1, v/v);

$^1\text{H NMR}$  (600 MHz,  $\text{CDCl}_3$ ,  $23^\circ\text{C}$ ,  $\delta$ ): 8.94 (s, 1H), 7.88 (d,  $J = 8.2$  Hz, 1H), 7.68 (d,  $J = 8.4$  Hz, 1H), 7.57 (t,  $J = 7.5$  Hz, 1H), 7.37 (t,  $J = 7.5$  Hz, 1H), 6.99 (s, 1H), 4.39 (t,  $J = 6.2$  Hz, 2H), 3.52 (t,  $J = 6.7$  Hz, 2H), 2.12 (p,  $J = 6.8$  Hz, 2H), 2.02 (h,  $J = 7.3$  Hz, 2H) ppm.

$^{13}\text{C NMR}$  (100 MHz,  $\text{CDCl}_3$ ,  $23^\circ\text{C}$ ,  $\delta$ ): 161.1, 150.9, 139.4, 130.6, 127.8, 125.7, 125.4, 124.5, 101.6, 65.9, 33.7, 29.7, 28.1 ppm.

**HRMS-ESI (m/z)** calc'd for  $\text{C}_{13}\text{H}_{15}\text{BrNO}$   $[\text{M}+\text{H}]^+$ , 280.0322; found, 280.0305.

### Synthesis of material (2)<sup>[15]</sup>

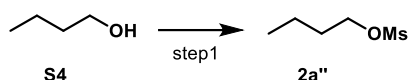

**Step 1:** S4 and  $\text{Et}_3\text{N}$  (2.0 equiv.) were dissolved in 3mL  $\text{CH}_2\text{Cl}_2$ , then added MsCl (1.1 equiv.). The resulting mixture was stirred for 3h at room temperature. 20 ml water was added to the mixture and then the mixture was extracted with  $\text{CH}_2\text{Cl}_2$  (50 mL x 3), an organic layer washed with water (50 mL), dried over  $\text{Na}_2\text{SO}_4$ , and concentrated in vacuo to afford the compounds 2a''.

### Butyl methyl sulfate (2a'')

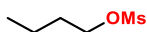

**Physical state:** yellow oil;

$R_f = 0.3$  (silica gel, PE: EtOAc = 50:1, v/v);

$^1\text{H NMR}$  (600 MHz,  $\text{CDCl}_3$ ,  $23^\circ\text{C}$ ,  $\delta$ ): 4.22 (t,  $J = 6.7$  Hz, 2H), 2.99 (d,  $J = 1.1$  Hz, 3H), 1.74 – 1.69 (m, 2H), 1.43 (h,  $J = 7.4$  Hz, 2H), 0.96 – 0.92 (m, 3H) ppm.

$^{13}\text{C NMR}$  (100 MHz,  $\text{CDCl}_3$ ,  $23^\circ\text{C}$ ,  $\delta$ ): 70.0, 37.5, 31.2, 18.8, 13.6 ppm.

### Synthesis of material (3)<sup>[13-15]</sup>

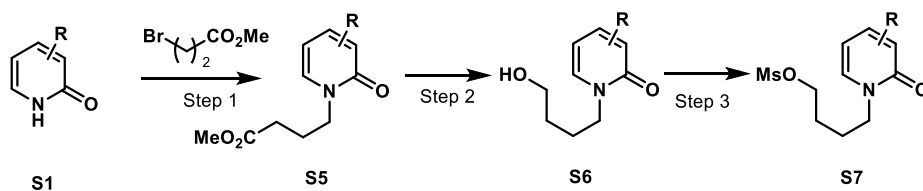

**Step 1:** 500 mg of S1 was dissolved in 3mL DMF. NaH (1.1 equiv.) Was added to DMF to form a suspension and slowly added dropwise at  $0^\circ\text{C}$  for 30 minutes. Methyl 4-bromobutanoate (1.5 equiv.) was added and the resulting mixture was stirred overnight at room temperature. 20 ml water was added to the mixture and then the mixture was extracted with  $\text{CH}_2\text{Cl}_2$  (50 mL x 3), an organic layer washed with water (50 mL), dried over  $\text{Na}_2\text{SO}_4$ , and concentrated in vacuo to afford the compounds S5.



**Step 2:** S5 and NaBH<sub>4</sub> (6.0 equiv.) were dissolved in MeOH. The resulting mixture was stirred overnight at room temperature. 20 ml water was added to the mixture and then the mixture was extracted with CH<sub>2</sub>Cl<sub>2</sub> (50 mL x 3), an organic layer washed with water (50 mL), dried over Na<sub>2</sub>SO<sub>4</sub>, and concentrated in vacuo to afford the compounds S6.

**Step 3:** S6 and Et<sub>3</sub>N (2.0 equiv.) were dissolved in 3mL CH<sub>2</sub>Cl<sub>2</sub>, then added MsCl (1.1 equiv.). The resulting mixture was stirred for 3h at room temperature. 20 ml water was added to the mixture and then the mixture was extracted with CH<sub>2</sub>Cl<sub>2</sub> (50 mL x 3), an organic layer washed with water (50 mL), dried over Na<sub>2</sub>SO<sub>4</sub>, and concentrated in vacuo to afford the compounds S7.

**Methyl (4-(2-oxopyridin-1(2H)-yl)butyl) sulfate (4a')**

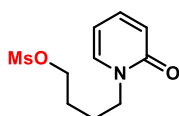

**Physical state:** yellow oil;

**R<sub>f</sub>** = 0.3 (silica gel, EtOAc, v/v);

**<sup>1</sup>H NMR** (600 MHz, CDCl<sub>3</sub>, 23°C, δ): 7.30 (t, *J* = 7.7 Hz, 1H), 7.27 (d, *J* = 6.7 Hz, 1H), 6.51 (d, *J* = 9.1 Hz, 1H), 6.16 (t, *J* = 6.7 Hz, 1H), 4.25 (t, *J* = 6.2 Hz, 2H), 3.95 (t, *J* = 7.2 Hz, 2H), 3.00 (s, 3H), 1.89 – 1.85 (m, 2H), 1.80 – 1.76 (m, 2H) ppm.

**<sup>13</sup>C NMR** (100 MHz, CDCl<sub>3</sub>, 23°C, δ): 162.5, 139.5, 137.4, 120.9, 106.2, 69.4, 48.7, 37.2, 26.1, 25.3 ppm.

**HRMS-ESI (m/z)** calc'd for C<sub>10</sub>H<sub>15</sub>NNaO<sub>4</sub>S [M+Na]<sup>+</sup>, 268.0615; found, 268.0614.

**Methyl 4-(2-oxopyridin-1(2H)-yl)butanoate (4p)**

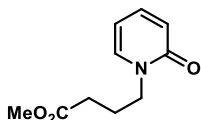

**Physical state:** yellow oil;

**R<sub>f</sub>** = 0.4 (silica gel, PE: EtOAc = 1:1, v/v);

**<sup>1</sup>H NMR** (600 MHz, CDCl<sub>3</sub>, 23°C, δ): 7.29 (ddd, *J* = 8.8, 6.5, 2.0 Hz, 1H), 7.25 (s, 1H), 6.54 (d, *J* = 9.1 Hz, 1H), 6.14 (t, *J* = 7.3 Hz, 1H), 3.97 (t, *J* = 7.2 Hz, 2H), 3.66 (s, 3H), 2.37 (t, *J* = 7.2 Hz, 2H), 2.07 (q, *J* = 7.2 Hz, 2H) ppm.

**<sup>13</sup>C NMR** (100 MHz, CDCl<sub>3</sub>, 23°C, δ): 173.4, 162.8, 139.6, 137.7, 121.3, 106.2, 51.9, 48.9, 30.8, 24.5 ppm.

HRMS-ESI (m/z) calc'd for C<sub>10</sub>H<sub>13</sub>NNaO<sub>3</sub> [M+Na]<sup>+</sup>, 218.0788; found, 218.0788.

**Methyl (4-(5-methyl-2-oxopyridin-1(2H)-yl)butyl) sulfate (4j')**

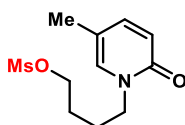

**Physical state:** yellow oil;

**R<sub>f</sub>** = 0.4 (silica gel, EtOAc, v/v);

**<sup>1</sup>H NMR** (600 MHz, CDCl<sub>3</sub>, 23°C, δ): 7.14 (d, *J* = 8.2 Hz, 1H), 6.99 (s, 1H), 6.44 (d, *J* = 9.3 Hz, 1H), 4.22 (t, *J* = 6.2 Hz, 2H), 3.89 (t, *J* = 7.2 Hz, 2H), 2.97 (s, 3H), 2.02 (s, 3H), 1.82 (p, *J* = 7.1 Hz, 2H), 1.78 – 1.72 (m, 2H) ppm.

**<sup>13</sup>C NMR** (100 MHz, CDCl<sub>3</sub>, 23°C, δ): 161.9, 142.2, 134.8, 120.6, 115.4, 69.4, 48.6, 37.3, 26.2, 25.5, 17.1 ppm.

HRMS-ESI (m/z) calc'd for C<sub>11</sub>H<sub>17</sub>NNaO<sub>4</sub>S [M+Na]<sup>+</sup>, 282.0769; found, 282.0770.

**Methyl 4-(5-methyl-2-oxopyridin-1(2H)-yl)butanoate (4q)**

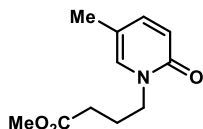

**Physical state:** yellow oil;

**R<sub>f</sub>** = 0.4 (silica gel, PE: EtOAc = 1:1, v/v);

**<sup>1</sup>H NMR** (600 MHz, CDCl<sub>3</sub>, 23°C, δ): 7.17 (dd, *J* = 9.2, 2.5 Hz, 1H), 7.04 – 7.03 (m, 1H), 6.50 (d, *J* = 9.2 Hz, 1H), 3.94 (t, *J* = 7.3 Hz, 2H), 3.68 (s, 3H), 2.38 (t, *J* = 7.2 Hz, 2H), 2.06 (d, *J* = 4.3 Hz, 3H), 1.30 – 1.22 (m, 2H) ppm.

**<sup>13</sup>C NMR** (100 MHz, CDCl<sub>3</sub>, 23°C, δ): 173.5, 162.0, 142.2, 135.1, 120.9, 115.2, 51.9, 48.7, 30.9, 24.6, 17.2 ppm.

HRMS-ESI (m/z) calc'd for C<sub>11</sub>H<sub>15</sub>NNaO<sub>3</sub> [M+Na]<sup>+</sup>, 232.0945; found, 232.0944.

**Synthesis of material (4)**<sup>[16-17]</sup>

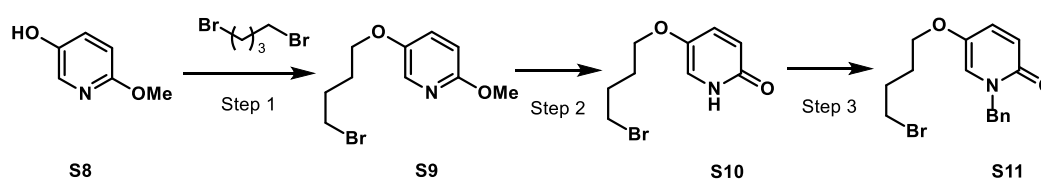

**Step 1:** 500 mg of **S8** was dissolved in 3mL DMF. NaH (1.1 equiv.) Was added to DMF to form a suspension and slowly added dropwise at 0°C for 30 minutes. 1,4-

Dibromobutane (1.5 equiv.) was added and the resulting mixture was stirred overnight at room temperature. 20 ml water was added to the mixture and then the mixture was extracted with CH<sub>2</sub>Cl<sub>2</sub> (50 mL x 3), an organic layer washed with water (50 mL), dried over Na<sub>2</sub>SO<sub>4</sub>, and concentrated in vacuo to afford the compounds **S9**.

**Step 2:** **S9** was dissolved in 20 ml of solvent (HCl:Dioxane = 1:1). And was stirred for 3h at 100°C. 20 ml water was added to the mixture and then the mixture was extracted with CH<sub>2</sub>Cl<sub>2</sub> (50 mL x 3), an organic layer washed with water (50 mL), dried over Na<sub>2</sub>SO<sub>4</sub>, and concentrated in vacuo to afford the compounds **S10**.

**Step 3:** **S10** and K<sub>2</sub>CO<sub>3</sub> (2.0 equiv.) were dissolved in 3mL acetone, then added BrBn. The resulting mixture was stirred overnight at room temperature. 20 ml water was added to the mixture and then the mixture was extracted with CH<sub>2</sub>Cl<sub>2</sub> (50 mL x 3), an organic layer washed with water (50 mL), dried over Na<sub>2</sub>SO<sub>4</sub>, and concentrated in vacuo to afford the compounds **S11**.

#### 1-Benzyl-4-(4-bromobutoxy)pyridin-2(1H)-one (2e)

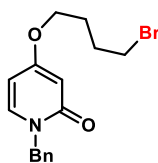

**Physical state:** yellow oil;

**R<sub>f</sub>** = 0.4 (silica gel, PE: EtOAc = 2:1, v/v);

**<sup>1</sup>H NMR** (600 MHz, CDCl<sub>3</sub>, 23°C, δ): 7.32 (t, *J* = 7.3 Hz, 2H), 7.27 – 7.25 (m, 3H), 7.12 (d, *J* = 7.5 Hz, 1H), 5.91 (s, 1H), 5.87 (d, *J* = 8.0 Hz, 1H), 5.08 (s, 2H), 3.94 (t, *J* = 6.1 Hz, 2H), 3.45 (t, *J* = 6.6 Hz, 2H), 2.04 – 1.99 (m, 2H), 1.95 – 1.89 (m, 2H) ppm.

**<sup>13</sup>C NMR** (100 MHz, CDCl<sub>3</sub>, 23°C, δ): 167.1, 137.2, 136.7, 128.8, 127.9, 127.9, 101.3, 97.9, 67.2, 51.0, 33.1, 29.3, 27.4 ppm.

**HRMS-ESI (m/z)** calc'd for C<sub>16</sub>H<sub>19</sub>BrNO<sub>2</sub> [M+H]<sup>+</sup>, 336.0596; found, 336.0594.

#### 1-Benzyl-5-(4-bromobutoxy)pyridin-2(1H)-one (4m)

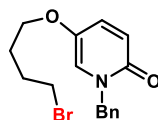

**Physical state:** scarlet oil;

**R<sub>f</sub>** = 0.3 (silica gel, PE: EtOAc = 1:1, v/v);

**<sup>1</sup>H NMR** (600 MHz, CDCl<sub>3</sub>, 23°C, δ): 7.34 (t, *J* = 7.4 Hz, 2H), 7.29 (dd, *J* = 12.6, 7.2 Hz, 3H), 7.16 (dd, *J* = 9.8, 3.2 Hz, 1H), 6.74 (d, *J* = 3.2 Hz, 1H), 6.60 (d, *J* = 9.8 Hz,

1H), 5.11 (s, 2H), 3.73 (t,  $J = 6.1$  Hz, 2H), 3.43 (t,  $J = 6.6$  Hz, 2H), 2.02 – 1.96 (m, 2H), 1.87 – 1.82 (m, 2H) ppm.

$^{13}\text{C}$  NMR (100 MHz,  $\text{CDCl}_3$ , 23°C,  $\delta$ ): 160.8, 142.5, 136.5, 134.3, 129.0, 128.1, 122.1, 119.4, 68.7, 52.2, 33.4, 29.3, 27.8 ppm.

HRMS-ESI ( $m/z$ ) calc'd for  $\text{C}_{16}\text{H}_{19}\text{BrNO}_2$   $[\text{M}+\text{H}]^+$ , 336.0593; found, 336.0594.

#### 5-(4-Bromobutoxy)-2-methoxypyridine (4r)

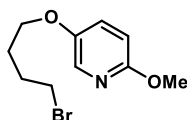

**Physical state:** yellow oil;

$R_f = 0.6$  (silica gel, PE: EtOAc = 30:1, v/v);

$^1\text{H}$  NMR (600 MHz,  $\text{CDCl}_3$ , 23°C,  $\delta$ ): 7.75 (d,  $J = 3.1$  Hz, 1H), 7.15 (dd,  $J = 9.0, 3.1$  Hz, 1H), 6.64 (d,  $J = 8.9$  Hz, 1H), 3.93 (t,  $J = 6.1$  Hz, 2H), 3.84 (s, 3H), 3.44 (t,  $J = 6.7$  Hz, 2H), 2.02 (dt,  $J = 14.8, 6.8$  Hz, 2H), 1.88 (dt,  $J = 12.6, 6.3$  Hz, 2H) ppm.

$^{13}\text{C}$  NMR (100 MHz,  $\text{CDCl}_3$ , 23°C,  $\delta$ ): 158.8, 150.3, 131.8, 127.3, 111.1, 68.1, 53.5, 33.4, 29.4, 28.0 ppm.

HRMS-ESI ( $m/z$ ) calc'd for  $\text{C}_{10}\text{H}_{15}\text{BrNO}_2$   $[\text{M}+\text{H}]^+$ , 260.0281; found, 260.0281.

#### 5-(4-Bromobutoxy)pyridin-2(1H)-one (4s)

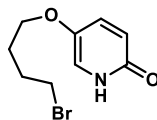

**Physical state:** white solid;

**Melting point:** 88°C;

$R_f = 0.3$  (silica gel, EtOAc = 1:1, v/v);

$^1\text{H}$  NMR (600 MHz,  $\text{CDCl}_3$ , 23°C,  $\delta$ ): 7.30 (d,  $J = 6.9$  Hz, 1H), 6.94 (d,  $J = 3.1$  Hz, 1H), 6.57 (d,  $J = 9.7$  Hz, 1H), 3.82 (t,  $J = 6.0$  Hz, 2H), 3.46 (t,  $J = 6.6$  Hz, 2H), 2.03 (p,  $J = 6.7$  Hz, 2H), 1.93 – 1.88 (m, 2H) ppm.

$^{13}\text{C}$  NMR (100 MHz,  $\text{CDCl}_3$ , 23°C,  $\delta$ ): 143.7, 136.1, 116.6, 68.6, 33.3, 29.4, 27.9 ppm.

HRMS-ESI ( $m/z$ ) calc'd for  $\text{C}_9\text{H}_{13}\text{BrNO}_2$   $[\text{M}+\text{H}]^+$ , 246.0124; found, 246.0124.

## 5. Experimental procedure and characterization for the synthesis

### General procedure for synthesis of 3.

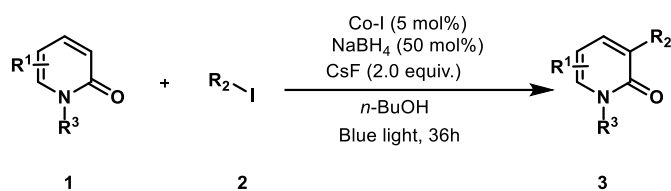

Under the argon atmosphere, a 4-mL borosilicate vial equipped with a magnetic stir bar was charged with Co(*n*-butylamine)(dmgH)<sub>2</sub>Br (6.9 mg, 5 mol%). *n*-BuOH (500  $\mu$ L,  $c = 0.40$  M) and CsF (60.8 mg, 2.0 equiv.) were added into the vial. Then **1** (0.2 mmol) and **2** (0.4 mmol) were added into the same vial. The vial was sealed with a septum cap. The reaction mixture that was irradiated with the white LED (2\*5W) was stirred at approximately 30°C with the use of a cooling fan for 36 hours. Then the reaction mixture was transferred to a flask with ethyl acetate, and the volatiles were removed under vacuo. The residues were then purified by flash column chromatography on silica gel, eluting with hexanes to afford **3**.

#### 1-Benzyl-3-butylpyridin-2(1H)-one (**3a**)

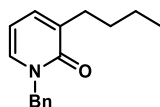

**Physical state:** colorless oil;

$R_f = 0.5$  (silica gel, PE: EtOAc = 5:1, v/v);

<sup>1</sup>H NMR (600 MHz, CDCl<sub>3</sub>, 23°C,  $\delta$ ): 7.31 (q,  $J = 7.0$  Hz, 5H), 7.15 (d,  $J = 6.8$  Hz, 2H), 6.09 (t,  $J = 6.8$  Hz, 1H), 5.14 (s, 2H), 2.58 – 2.52 (m, 2H), 1.61 – 1.53 (m, 2H), 1.39 (q,  $J = 7.4$  Hz, 2H), 0.93 (t,  $J = 7.3$  Hz, 3H) ppm.

<sup>13</sup>C NMR (100 MHz, CDCl<sub>3</sub>, 23°C,  $\delta$ ): 136.8, 135.8, 134.6, 134.5, 129.0, 128.3, 128.0, 106.0, 52.4, 30.8, 30.6, 22.8, 14.1 ppm.

HRMS-EI ( $m/z$ ) calc'd for C<sub>16</sub>H<sub>20</sub>NO [M+H]<sup>+</sup>, 242.1538; found, 242.1539.

#### 3-Butyl-1-(thiophen-2-yl)pyridin-2(1H)-one (**3b**)

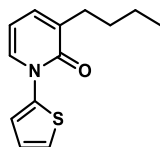

**Physical state:** white solid;

**Melting point:** 81°C;

$R_f = 0.4$  (silica gel, PE: EtOAc = 5:1, v/v);

<sup>1</sup>H NMR (600 MHz, CDCl<sub>3</sub>, 23°C, δ): 7.32 (dd, *J* = 3.2, 1.4 Hz, 1H), 7.27 (dd, *J* = 5.2, 3.3 Hz, 1H), 7.21 (dd, *J* = 6.9, 2.0 Hz, 1H), 7.18 (t, *J* = 2.6 Hz, 1H), 7.12 (ddt, *J* = 6.8, 2.0, 1.0 Hz, 1H), 6.08 (t, *J* = 6.8 Hz, 1H), 2.50 – 2.44 (m, 2H), 1.50 (dq, *J* = 9.2, 7.6 Hz, 2H), 1.30 (h, *J* = 7.4 Hz, 2H), 0.85 (t, *J* = 7.3 Hz, 3H) ppm.

<sup>13</sup>C NMR (100 MHz, CDCl<sub>3</sub>, 23°C, δ): 162.2, 139.4, 140.0, 136.0, 135.2, 135.1, 125.3, 119.7, 105.9, 30.9, 30.5, 22.7, 14.1 ppm.

HRMS-EI (*m/z*) calc'd for C<sub>12</sub>H<sub>15</sub>NNaOS [M+Na]<sup>+</sup>, 256.0762; found, 256.0767.

### 1-Benzyl-3-butyl-5-(trifluoromethyl)pyridin-2(1*H*)-one (3c)

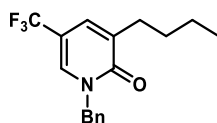

**Physical state:** white solid;

**Melting point:** 87°C;

**R<sub>f</sub>** = 0.4 (silica gel, PE: EtOAc = 5:1, v/v);

<sup>1</sup>H NMR (600 MHz, CDCl<sub>3</sub>, 23°C, δ): 7.48 (dd, *J* = 2.8, 1.4 Hz, 1H), 7.32 – 7.27 (m, 2H), 7.25 – 7.18 (m, 4H), 5.08 (s, 2H), 2.54 – 2.47 (m, 2H), 1.51 (dd, *J* = 15.3, 7.8 Hz, 2H), 1.33 (h, *J* = 7.4 Hz, 2H), 0.88 (t, *J* = 7.4 Hz, 3H) ppm.

<sup>13</sup>C NMR (100 MHz, CDCl<sub>3</sub>, 23°C, δ): δ 161.2, 134.5 (2C), 132.8 (q, *J* = 5.5 Hz), 129.8 (q, *J* = 5.6 Hz), 128.0, 127.4, 127.2, 122.5 (q, *J* = 269.7 Hz), 108.4 (q, *J* = 34.4 Hz), 51.9, 29.6, 29.1, 21.5, 12.9 ppm.

<sup>19</sup>F NMR (565 MHz, CDCl<sub>3</sub>, 23°C, δ): -62.4 ppm.

HRMS-EI (*m/z*) calc'd for C<sub>17</sub>H<sub>19</sub>NOF<sub>3</sub> [M+H]<sup>+</sup>, 310.1413; found, 310.1413.

### 1-Benzyl-5-bromo-3-butylpyridin-2(1*H*)-one (3d)

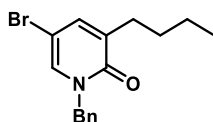

**Physical state:** light yellow liquid;

**R<sub>f</sub>** = 0.4 (silica gel, PE: EtOAc = 5:1, v/v);

<sup>1</sup>H NMR (600 MHz, CDCl<sub>3</sub>, 23°C, δ): 7.31 – 7.25 (m, 2H), 7.25 – 7.18 (m, 4H), 7.12 (dd, *J* = 2.5, 1.3 Hz, 1H), 5.03 (s, 2H), 2.47 (t, *J* = 7.8 Hz, 2H), 1.55 – 1.45 (m, 2H), 1.32 (h, *J* = 7.4 Hz, 2H), 0.87 (t, *J* = 7.3 Hz, 3H) ppm.

$^{13}\text{C}$  NMR (100 MHz,  $\text{CDCl}_3$ , 23°C,  $\delta$ ): 161.2, 138.7, 136.3, 136.1, 134.2, 129.1, 128.4 (2), 98.2, 52.5, 30.7, 30.3, 22.7, 14.1 ppm.

HRMS-EI ( $m/z$ ) calc'd for  $\text{C}_{16}\text{H}_{19}\text{NOBr}$   $[\text{M}+\text{H}]^+$ , 320.0643; found, 320.0645.

### 1-Benzyl-3-butyl-6-methylpyridin-2(1H)-one (3e)

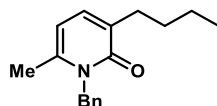

**Physical state:** colorless oil;

$R_f$  = 0.5 (silica gel, PE: EtOAc = 5:1, v/v);

$^1\text{H}$  NMR (600 MHz,  $\text{CDCl}_3$ , 23°C,  $\delta$ ): 7.31 – 7.28 (m, 2H), 7.23 (td,  $J$  = 7.1, 1.4 Hz, 1H), 7.15 – 7.09 (m, 3H), 5.97 (dd,  $J$  = 6.9, 1.2 Hz, 1H), 5.36 (s, 2H), 2.57 – 2.52 (m, 2H), 2.25 (s, 3H), 1.61 – 1.57 (m, 2H), 1.41 – 1.37 (m, 2H), 0.95 – 0.92 (m, 3H) ppm.

$^{13}\text{C}$  NMR (100 MHz,  $\text{CDCl}_3$ , 23°C,  $\delta$ ): 164.1, 150.7, 139.2, 136.9, 128.9, 127.3, 126.4, 117.8, 105.9, 46.6, 33.0, 31.4, 28.4, 22.4, 14.0 ppm.

HRMS-EI ( $m/z$ ) calc'd for  $\text{C}_{17}\text{H}_{22}\text{NO}$   $[\text{M}+\text{H}]^+$ , 256.1691; found, 256.1696.

### 3-Butylpyrido[2,1-a]isoindol-4(6H)-one (3f)

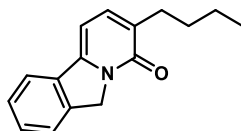

**Physical state:** white solid;

**Melting point:** 105°C;

$R_f$  = 0.2 (silica gel, PE: EtOAc = 10:1, v/v);

$^1\text{H}$  NMR (600 MHz,  $\text{CDCl}_3$ , 23°C,  $\delta$ ): 7.61 – 7.58 (m, 1H), 7.47 – 7.45 (m, 1H), 7.36 – 7.32 (m, 2H), 7.13 (s, 1H), 6.55 (d,  $J$  = 6.8 Hz, 1H), 5.01 (s, 2H), 2.52 (t,  $J$  = 7.9 Hz, 2H), 1.50 (d,  $J$  = 6.9 Hz, 2H), 1.29 (dt,  $J$  = 14.9, 7.4 Hz, 2H), 0.82 (t,  $J$  = 7.3 Hz, 3H) ppm.

$^{13}\text{C}$  NMR (100 MHz,  $\text{CDCl}_3$ , 23°C,  $\delta$ ): 161.7, 145.6, 137.9, 136.7, 134.2, 131.2, 129.8, 128.4, 123.5, 121.0, 98.4, 52.7, 31.0, 30.2, 22.7, 14.1 ppm.

HRMS-EI ( $m/z$ ) calc'd for  $\text{C}_{16}\text{H}_{17}\text{NNaO}$   $[\text{M}+\text{Na}]^+$ , 262.1202; found, 262.1202.

### 3-Butyl-5-methyl-1-phenylpyridin-2(1H)-one (3g)

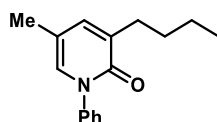

**Physical state:** yellow oil;

$R_f$  = 0.4 (silica gel, PE: EtOAc = 5:1, v/v);

$^1\text{H NMR}$  (600 MHz,  $\text{CDCl}_3$ , 23°C,  $\delta$ ): 7.48 – 7.43 (m, 2H), 7.40 – 7.34 (m, 3H), 7.11 (d,  $J$  = 2.5 Hz, 1H), 7.01 (dd,  $J$  = 2.6, 1.3 Hz, 1H), 2.58 – 2.51 (m, 2H), 2.08 (s, 3H), 1.64 – 1.56 (m, 2H), 1.39 (q,  $J$  = 7.4 Hz, 2H), 0.94 (t,  $J$  = 7.3 Hz, 3H) ppm.

$^{13}\text{C NMR}$  (100 MHz,  $\text{CDCl}_3$ , 23°C,  $\delta$ ): 161.8, 139.1, 134.5, 132.7, 129.2, 128.1, 126.8, 114.5, 30.8, 30.6, 22.8, 17.4, 14.1 ppm.

**HRMS-EI (m/z)** calc'd for  $\text{C}_{16}\text{H}_{20}\text{NO}$   $[\text{M}+\text{H}]^+$ , 242.1539; found, 242.1539.

### 1-Benzyl-3-ethylpyridin-2(1H)-one (3h)

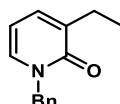

**Physical state:** yellow oil;

$R_f$  = 0.4 (silica gel, PE: EtOAc = 5:1, v/v);

$^1\text{H NMR}$  (600 MHz,  $\text{CDCl}_3$ , 23°C,  $\delta$ ): 7.35 – 7.33 (m, 1H), 7.33 – 7.32 (m, 1H), 7.31 – 7.28 (m, 3H), 7.16 (d,  $J$  = 6.8 Hz, 2H), 6.11 (t,  $J$  = 6.8 Hz, 1H), 5.16 (s, 2H), 2.59 (q,  $J$  = 7.5 Hz, 2H), 1.19 (d,  $J$  = 7.5 Hz, 3H) ppm.

$^{13}\text{C NMR}$  (100 MHz,  $\text{CDCl}_3$ , 23°C,  $\delta$ ): 162.7, 136.7, 135.7, 134.7, 134.4, 128.8, 128.2, 127.9, 105.9, 52.2, 23.8, 12.5 ppm.

**HRMS-EI (m/z)** calc'd for  $\text{C}_{14}\text{H}_{15}\text{NNaO}$   $[\text{M}+\text{Na}]^+$ , 236.1046; found, 236.1046.

### 1-Benzyl-3-(5-phenylpentyl)pyridin-2(1H)-one (3i)

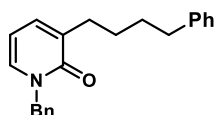

**Physical state:** yellow oil;

$R_f$  = 0.6 (silica gel, PE: EtOAc = 5:1, v/v);

$^1\text{H NMR}$  (600 MHz,  $\text{CDCl}_3$ , 23°C,  $\delta$ ): 7.27 – 7.23 (m, 2H), 7.23 – 7.17 (m, 5H), 7.11 – 7.05 (m, 5H), 6.01 (t,  $J$  = 6.9 Hz, 1H), 5.08 – 5.07 (m, 2H), 2.57 (d,  $J$  = 7.7 Hz, 2H), 2.51 (d,  $J$  = 7.2 Hz, 2H), 1.60 (h,  $J$  = 7.7 Hz, 4H) ppm.



<sup>13</sup>C NMR (100 MHz, CDCl<sub>3</sub>, 23°C, δ): 162.8, 142.8, 136.8, 136.0, 134.7, 134.2, 128.9, 128.6, 128.4, 128.3, 128.0, 125.7, 106.0, 52.4, 35.9, 31.5, 30.9, 28.1 ppm.

HRMS-EI (m/z) calc'd for C<sub>22</sub>H<sub>24</sub>NO [M+H]<sup>+</sup>, 318.1851; found, 318.1852.

### 1-Benzyl-3-(4-chlorobutyl)pyridin-2(1H)-one (3j)

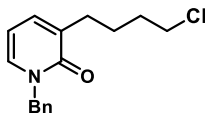

**Physical state:** yellow oil;

**R<sub>f</sub>** = 0.3 (silica gel, PE: EtOAc = 5:1, v/v);

<sup>1</sup>H NMR (600 MHz, CDCl<sub>3</sub>, 23°C, δ): 7.35 – 7.32 (m, 2H), 7.31 – 7.28 (m, 3H), 7.18 (d, *J* = 7.0 Hz, 2H), 6.10 (t, *J* = 6.8 Hz, 1H), 5.15 (s, 2H), 3.57 (t, *J* = 6.6 Hz, 2H), 2.58 (t, *J* = 7.6 Hz, 2H), 1.87 – 1.82 (m, 2H), 1.78 – 1.72 (m, 2H) ppm.

<sup>13</sup>C NMR (100 MHz, CDCl<sub>3</sub>, 23°C, δ): 162.7, 136.7, 136.1, 135.0, 133.6, 129.0, 128.3, 128.1, 105.9, 52.4, 45.1, 32.5, 30.3, 25.7 ppm.

HRMS-EI (m/z) calc'd for C<sub>16</sub>H<sub>19</sub>ClNO [M+H]<sup>+</sup>, 276.1149; found, 276.1150

### 1-Benzyl-3-(5-phenylpentan-2-yl)pyridin-2(1H)-one (3k)

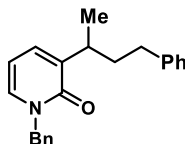

**Physical state:** yellow oil;

**R<sub>f</sub>** = 0.6 (silica gel, PE: EtOAc = 5:1, v/v);

<sup>1</sup>H NMR (600 MHz, CDCl<sub>3</sub>, 23°C, δ): 7.31 (t, *J* = 7.5 Hz, 2H), 7.27 (d, *J* = 7.3 Hz, 3H), 7.24 – 7.20 (m, 3H), 7.13 (d, *J* = 7.5 Hz, 4H), 6.10 (t, *J* = 6.8 Hz, 1H), 5.14 (q, *J* = 14.5 Hz, 2H), 3.19 (p, *J* = 7.0 Hz, 1H), 2.62 (dq, *J* = 15.8, 5.5 Hz, 1H), 2.53 (td, *J* = 12.5, 5.4 Hz, 1H), 1.95 (td, *J* = 12.4, 6.2 Hz, 1H), 1.75 (tt, *J* = 12.6, 6.3 Hz, 1H), 1.21 (t, *J* = 8.2 Hz, 3H) ppm.

<sup>13</sup>C NMR (100 MHz, CDCl<sub>3</sub>, 23°C, δ): 162.5, 142.9, 138.8, 136.8, 134.6, 134.1, 129.0, 128.5, 128.4, 128.3, 128.0, 125.7, 106.1, 52.5, 38.1, 34.1, 33.3, 20.0 ppm.

HRMS-EI (m/z) calc'd for C<sub>22</sub>H<sub>24</sub>NO [M+H]<sup>+</sup>, 318.1851; found, 318.1852.

### 1-Benzyl-3-cyclopentylpyridin-2(1H)-one (3l)

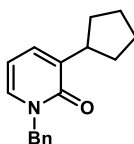

**Physical state:** yellow oil;

$R_f$  = 0.5 (silica gel, PE: EtOAc = 5:1, v/v);

$^1\text{H NMR}$  (600 MHz,  $\text{CDCl}_3$ , 23°C,  $\delta$ ): 7.35 – 7.32 (m, 2H), 7.31 – 7.27 (m, 3H), 7.18 (dd,  $J$  = 6.9, 2.0 Hz, 1H), 7.14 (dd,  $J$  = 6.8, 2.0 Hz, 1H), 6.10 (t,  $J$  = 6.8 Hz, 1H), 5.15 (s, 2H), 3.28 – 3.22 (m, 1H), 2.05 (dq,  $J$  = 13.0, 5.2 Hz, 2H), 1.75 (qd,  $J$  = 10.7, 5.7 Hz, 2H), 1.71 – 1.65 (m, 2H), 1.49 (dq,  $J$  = 11.6, 8.5 Hz, 2H) ppm.

$^{13}\text{C NMR}$  (100 MHz,  $\text{CDCl}_3$ , 23°C,  $\delta$ ): 162.8, 137.9, 136.9, 134.3, 133.3, 128.9, 128.30, 128.0, 105.9, 52.4, 40.4, 32.1, 25.3 ppm.

**HRMS-EI (m/z)** calc'd for  $\text{C}_{17}\text{H}_{20}\text{NO}$   $[\text{M}+\text{H}]^+$ , 254.1539; found, 254.1538.

### 1-Benzyl-3-cyclohexylpyridin-2(1H)-one (3m)

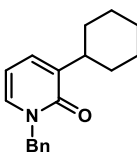

**Physical state:** yellow oil;

$R_f$  = 0.5 (silica gel, PE: EtOAc = 5:1, v/v);

$^1\text{H NMR}$  (600 MHz,  $\text{CDCl}_3$ , 23°C,  $\delta$ ): 7.35 - 7.32 (m, 2H), 7.31 – 7.28 (m, 3H), 7.15 (dd,  $J$  = 6.8, 2.0 Hz, 1H), 7.12 (dd,  $J$  = 6.9, 2.0 Hz, 1H), 6.12 (t,  $J$  = 6.8 Hz, 1H), 5.14 (s, 2H), 2.91 (tt,  $J$  = 12.0, 3.2 Hz, 1H), 1.90 (d,  $J$  = 12.5 Hz, 2H), 1.80 (dt,  $J$  = 13.5, 3.4 Hz, 2H), 1.77 – 1.68 (m, 2H), 1.49 – 1.40 (m, 2H), 1.26 – 1.17 (m, 2H) ppm.

$^{13}\text{C NMR}$  (100 MHz,  $\text{CDCl}_3$ , 23°C,  $\delta$ ): 162.4, 139.3, 136.9, 134.2, 133.4, 128.9, 128.3, 127.97, 106.1, 52.6, 37.8, 32.6, 26.9, 26.5 ppm.

**HRMS-EI (m/z)** calc'd for  $\text{C}_{18}\text{H}_{22}\text{NO}$   $[\text{M}+\text{H}]^+$ , 268.1694; found, 268.1696.

### 1-Benzyl-3-(tetrahydro-2H-pyran-4-yl)pyridin-2(1H)-one (3n)

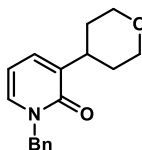

**Physical state:** yellow oil;

$R_f$  = 0.3 (silica gel, PE: EtOAc = 5:1, v/v);

**<sup>1</sup>H NMR** (600 MHz, CDCl<sub>3</sub>, 23°C, δ): 7.31 (q, *J* = 6.8 Hz, 5H), 7.22 – 7.13 (m, 2H), 6.16 (t, *J* = 6.8 Hz, 1H), 5.14 (s, 2H), 4.07 – 4.01 (m, 2H), 3.56 (td, *J* = 11.8, 1.9 Hz, 2H), 3.16 (tt, *J* = 12.1, 3.5 Hz, 1H), 1.86 – 1.79 (m, 2H), 1.64 – 1.53 (m, 2H) ppm.

**<sup>13</sup>C NMR** (100 MHz, CDCl<sub>3</sub>, 23°C, δ): 162.3, 137.1, 136.6, 134.8, 133.8, 129.0, 128.3, 128.1, 106.1, 68.5, 52.6, 35.1, 32.0 ppm.

**HRMS-EI (m/z)** calc'd for C<sub>17</sub>H<sub>20</sub>NO<sub>2</sub> [M+H]<sup>+</sup>, 270.1489; found, 270.1489.

### 1-Benzyl-3-(*tert*-butyl)pyridin-2(1*H*)-one (3o)

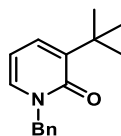

**Physical state:** white solid;

**Melting point:** 74°C;

**R<sub>f</sub>** = 0.5 (hexanes/ethyl acetate, 5:1, v/v);

**<sup>1</sup>H NMR** (600 MHz, CDCl<sub>3</sub>, 23°C, δ): 7.28 – 7.25 (m, 1H), 7.22 – 7.18 (m, 4H), 7.17 (dd, *J* = 7.1, 2.1 Hz, 1H), 7.09 (dd, *J* = 6.8, 2.0 Hz, 1H), 6.00 (t, *J* = 6.9 Hz, 1H), 5.07 (s, 2H), 1.30 (s, 9H) ppm.

**<sup>13</sup>C NMR** (100 MHz, CDCl<sub>3</sub>, 23°C, δ): 161.8, 141.0, 137.1, 135.1, 133.6, 128.9, 128.2, 127.9, 105.4, 52.1, 35.3, 28.7 ppm.

**HRMS-EI (m/z)** calc'd for C<sub>16</sub>H<sub>20</sub>NO [M+H]<sup>+</sup>, 242.1539; found, 242.1539.

### 7-Benzyl-3,4,5,7-tetrahydrooxepino[3,2-*c*]pyridin-6(2*H*)-one (3p)

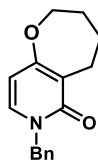

**Physical state:** colorless oil;

**R<sub>f</sub>** = 0.5 (hexanes/ethyl acetate, 2:1, v/v);

**<sup>1</sup>H NMR** (600 MHz, CDCl<sub>3</sub>, 23°C, δ): 7.33 (d, *J* = 7.1 Hz, 2H), 7.30 - 7.26 (m, 3H), 7.02 (d, *J* = 7.5 Hz, 1H), 5.88 (d, *J* = 7.5 Hz, 1H), 5.09 (s, 2H), 4.20 (t, *J* = 5.6 Hz, 2H), 2.88 - 2.86 (m, 2H), 1.97 (q, *J* = 6.0 Hz, 2H), 1.85 - 1.81 (m, 2H) ppm.

**<sup>13</sup>C NMR** (100 MHz, CDCl<sub>3</sub>, 23°C, δ): 167.3, 164.3, 136.8, 134.0, 128.8, 128.1, 127.8, 118.0, 103.5, 72.4, 52.2, 30.2, 24.5, 24.3 ppm.

**HRMS-EI (m/z)** calc'd for C<sub>16</sub>H<sub>17</sub>NNaO<sub>2</sub> [M+Na]<sup>+</sup>, 278.7751; found, 278.7751.

### 3-Butyl-2*H*-chromen-2-one (3q)

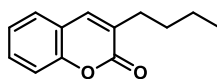

**Physical state:** white solid;

**Melting point:** 79°C;

$R_f$  = 0.5 (silica gel, PE: EtOAc = 10:1, v/v);

$^1\text{H NMR}$  (600 MHz,  $\text{CDCl}_3$ , 23°C,  $\delta$ ): 7.50 – 7.42 (m, 3H), 7.34 – 7.23 (m, 2H), 2.62 – 2.54 (m, 2H), 1.69 – 1.59 (m, 2H), 1.48 – 1.38 (m, 2H), 0.96 (d,  $J$  = 7.4 Hz, 3H) ppm.

$^{13}\text{C NMR}$  (100 MHz,  $\text{CDCl}_3$ , 23°C,  $\delta$ ): 162.0, 153.2, 138.5, 130.6, 130.2, 127.2, 124.3, 119.7, 116.5, 30.7, 30.2, 22.5, 14.0 ppm.

**HRMS-EI (m/z)** calc'd for  $\text{C}_{13}\text{H}_{14}\text{O}_2$   $[\text{M}+\text{Na}]^+$ , 225.0086; found, 225.0086.

### 1-Benzyl-3-butylquinolin-2(1*H*)-one (3r)

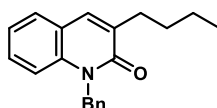

**Physical state:** colorless oil;

$R_f$  = 0.4 (silica gel, PE: EtOAc = 5:1, v/v);

$^1\text{H NMR}$  (600 MHz,  $\text{CDCl}_3$ , 23°C,  $\delta$ ): 7.57 (s, 1H), 7.52 – 7.50 (m, 1H), 7.35 (ddd,  $J$  = 8.7, 7.1, 1.6 Hz, 1H), 7.30 – 7.13 (m, 7H), 5.57 (s, 2H), 2.70 (t,  $J$  = 7.5 Hz, 2H), 1.68 (tt,  $J$  = 7.7, 6.3 Hz, 2H), 1.45 (h,  $J$  = 7.3 Hz, 2H), 0.97 (t,  $J$  = 7.4 Hz, 3H) ppm.

$^{13}\text{C NMR}$  (100 MHz,  $\text{CDCl}_3$ , 23°C,  $\delta$ ): 162.8, 138.5, 136.8, 135.4, 134.3, 129.4, 128.9, 128.2, 127.3, 126.8, 122.1, 121.1, 114.8, 46.4, 30.9, 30.6, 22.8, 14.1 ppm.

**HRMS-EI (m/z)** calc'd for  $\text{C}_{20}\text{H}_{22}\text{NO}$   $[\text{M}+\text{H}]^+$ , 292.1696; found, 292.1696.

### General procedure for synthesis of 5.

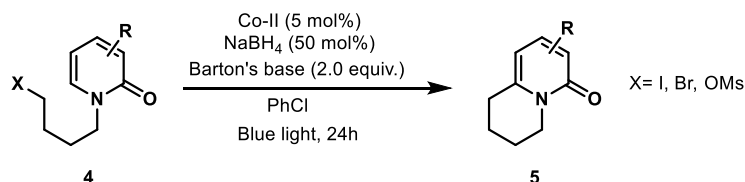

Under the argon atmosphere, a 4-mL borosilicate vial equipped with a magnetic stir bar was charged with Co(quinoline)(dmgH)<sub>2</sub>Cl (3.5 mg, 5 mol%). PhCl (1.0 mL, c = 0.1 M) and Barton's base (34.3 mg, 2.0 equiv.) were then added into the vial. Then **4** (0.1 mmol) were added into the same vial. The vial was sealed with a septum cap. The

reaction mixture that was irradiated with the blue LED (2\*5W) was stirred at room temperature for 24 hours. Then the reaction mixture was transferred to a flask with ethyl acetate, and the volatiles were removed under vacuo. The residues were then purified by flash column chromatography on silica gel, eluting with hexanes to afford **5**.

#### 6,7,8,9-Tetrahydro-4*H*-quinolizin-4-one (**5a**)

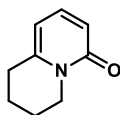

**Physical state:** yellow oil;

$R_f$  = 0.4 (silica gel, EtOAc, v/v);

$^1\text{H NMR}$  (600 MHz,  $\text{CDCl}_3$ , 23°C,  $\delta$ ) 7.24 (dd,  $J$  = 9.1, 6.9 Hz, 1H), 6.44 (d,  $J$  = 9.0 Hz, 1H), 6.00 (d,  $J$  = 6.9 Hz, 1H), 4.01 (t,  $J$  = 6.4 Hz, 2H), 2.78 (t,  $J$  = 6.7 Hz, 2H), 1.95 (p,  $J$  = 6.5 Hz, 2H), 1.80 (p,  $J$  = 6.7 Hz, 2H) ppm.

$^{13}\text{C NMR}$  (100 MHz,  $\text{CDCl}_3$ , 23°C,  $\delta$ ): 163.7, 147.8, 138.8, 116.8, 105.2, 41.7, 28.9, 22.3, 18.8 ppm.

**HRMS-ESI (m/z)** calc'd for  $\text{C}_9\text{H}_{11}\text{NNaO}$  [ $\text{M}+\text{Na}$ ] $^+$ , 172.0730; found 172.0733.

#### 3-Methyl-6,7,8,9-tetrahydro-4*H*-quinolizin-4-one (**5b**)

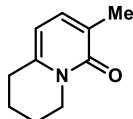

**Physical state:** yellow oil;

$R_f$  = 0.3 (silica gel, PE: EtOAc = 1:1, v/v);

$^1\text{H NMR}$  (600 MHz,  $\text{CDCl}_3$ , 23°C,  $\delta$ ): 7.10 (d,  $J$  = 7.0 Hz, 1H), 5.90 (d,  $J$  = 6.9 Hz, 1H), 4.01 (t,  $J$  = 6.4 Hz, 2H), 2.73 (t,  $J$  = 6.7 Hz, 2H), 2.11 (s, 3H), 1.92 (p,  $J$  = 6.5 Hz, 2H), 1.76 (p,  $J$  = 6.7 Hz, 2H) ppm.

$^{13}\text{C NMR}$  (100 MHz,  $\text{CDCl}_3$ , 23°C,  $\delta$ ): 163.8, 144.7, 136.3, 125.5, 104.6, 41.8, 28.7, 22.5, 18.9, 17.3 ppm.

**HRMS-ESI (m/z)** calc'd for  $\text{C}_{10}\text{H}_{13}\text{NNaO}$  [ $\text{M}+\text{Na}$ ] $^+$ , 186.0888; found 186.0889.

#### 1-Bromo-3-methyl-6,7,8,9-tetrahydro-4*H*-quinolizin-4-one (**5c**)

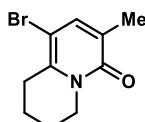

**Physical state:** yellow oil;

$R_f$  = 0.3 (silica gel, PE: EtOAc = 2:1, v/v);

<sup>1</sup>H NMR (600 MHz, CDCl<sub>3</sub>, 23°C, δ) 7.30 (s, 1H), 3.98 (t, *J* = 6.2 Hz, 2H), 2.82 (t, *J* = 6.8 Hz, 2H), 2.11 (s, 3H), 1.92 – 1.88 (m, 2H), 1.81 (q, *J* = 6.5 Hz, 2H) ppm.

<sup>13</sup>C NMR (100 MHz, CDCl<sub>3</sub>, 23°C, δ): 162.94, 141.9, 139.9, 139.8, 127.1, 99.2, 43.9, 29.5, 22.3, 19.2, 17.0 ppm.

HRMS-ESI (*m/z*) calc'd for C<sub>10</sub>H<sub>12</sub>BrNNaO [M+Na]<sup>+</sup>, 263.9994; found, 263.9994.

### 2-Methyl-6,7,8,9-tetrahydro-4*H*-quinolizin-4-one (5d)

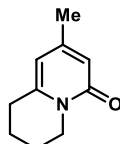

**Physical state:** yellow oil;

**R<sub>f</sub>** = 0.5 (silica gel, EtOAc, v/v);

<sup>1</sup>H NMR (600 MHz, CDCl<sub>3</sub>, 23°C, δ): 6.24 (s, 1H), 5.84 (s, 1H), 3.95 (t, *J* = 6.4 Hz, 2H), 2.72 (t, *J* = 6.7 Hz, 2H), 2.11 (s, 3H), 1.92 (p, *J* = 6.5 Hz, 2H), 1.76 (q, *J* = 6.6 Hz, 2H) ppm.

<sup>13</sup>C NMR (100 MHz, CDCl<sub>3</sub>, 23°C, δ): 163.7, 150.3, 146.5, 115.6, 107.7, 41.5, 28.8, 22.4, 21.2, 18.9 ppm.

HRMS-ESI (*m/z*) calc'd for C<sub>10</sub>H<sub>14</sub>NO [M+H]<sup>+</sup>, 164.1070; found, 164.1070.

### Methyl 6-oxo-1,3,4,6-tetrahydro-2*H*-quinolizine-8-carboxylate (5e)

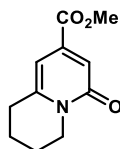

**Physical state:** White solid;

**Melting point:** 110°C;

**R<sub>f</sub>** = 0.4 (silica gel, EtOAc);

<sup>1</sup>H NMR (600 MHz, CDCl<sub>3</sub>, 23°C, δ): 7.02 – 7.01 (m, 1H), 6.48 (s, 1H), 3.99 (t, *J* = 6.4 Hz, 2H), 3.88 (s, 3H), 2.82 (t, *J* = 6.7 Hz, 2H), 1.95 (p, *J* = 6.6 Hz, 2H), 1.81 (p, *J* = 6.7 Hz, 2H) ppm.

<sup>13</sup>C NMR (100 MHz, CDCl<sub>3</sub>, 23°C, δ): 165.7, 163.5, 148.5, 139.5, 118.2, 103.6, 52.8, 42.2, 29.2, 22.2, 18.7 ppm.

HRMS-ESI (*m/z*) calc'd for C<sub>11</sub>H<sub>14</sub>NO<sub>3</sub> [M+H]<sup>+</sup>, 208.0966; found, 208.0968.

### 2-Methoxy-6,7,8,9-tetrahydro-4*H*-quinolizin-4-one (5f)

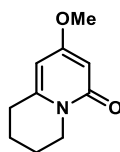

**Physical state:** White solid;

**Melting point:** 54°C;

**R<sub>f</sub>** = 0.2 (silica gel, PE: EtOAc = 2:1, v/v);

**<sup>1</sup>H NMR** (600 MHz, CDCl<sub>3</sub>, 23°C, δ): 5.82 (s, 1H), 5.71 – 5.70 (m, 1H), 3.92 (t, *J* = 6.4 Hz, 2H), 3.72 (s, 3H), 2.70 (t, *J* = 6.7 Hz, 2H), 1.90 (p, *J* = 6.6 Hz, 2H), 1.76 (p, *J* = 6.7 Hz, 2H) ppm.

**<sup>13</sup>C NMR** (100 MHz, CDCl<sub>3</sub>, 23°C, δ): 167.5, 165.3, 147.5, 99.1, 94.5, 55.3, 41.3, 28.9, 22.4, 18.9 ppm.

**HRMS-ESI (m/z)** calc'd for C<sub>10</sub>H<sub>14</sub>NO<sub>2</sub> [M+H]<sup>+</sup>, 180.1019; found, 180.1019.

### 2-Bromo-6,7,8,9-tetrahydro-4*H*-quinolizin-4-one (5g)

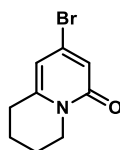

**Physical state:** White solid;

**Melting point:** 82°C;

**R<sub>f</sub>** = 0.3 (silica gel, PE: EtOAc = 1:1, v/v);

**<sup>1</sup>H NMR** (600 MHz, CDCl<sub>3</sub>, 23°C, δ): 6.65 (d, *J* = 2.1 Hz, 1H), 6.16 (d, *J* = 2.2 Hz, 1H), 3.91 (t, *J* = 6.4 Hz, 2H), 2.74 (t, *J* = 6.7 Hz, 2H), 1.95 – 1.90 (m, 2H), 1.79 (p, *J* = 6.7 Hz, 2H) ppm.

**<sup>13</sup>C NMR** (100 MHz, CDCl<sub>3</sub>, 23°C, δ) 162.5, 148.2, 135.1, 118.9, 109.3, 41.9, 28.7, 22.1, 18.6 ppm.

**HRMS-ESI (m/z)** calc'd for C<sub>9</sub>H<sub>11</sub>BrNO [M+H]<sup>+</sup>, 228.0015; found, 228.0019.

### 1-Bromo-6,7,8,9-tetrahydro-4*H*-quinolizin-4-one (5h)

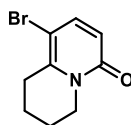

**Physical state:** yellow oil;

**R<sub>f</sub>** = 0.3 (silica gel, PE: EtOAc = 1:1, v/v);

**<sup>1</sup>H NMR** (600 MHz, CDCl<sub>3</sub>, 23°C, δ) 7.40 (d, *J* = 9.2 Hz, 1H), 6.35 (d, *J* = 9.6 Hz, 1H), 3.97 (d, *J* = 6.3 Hz, 2H), 2.85 (t, *J* = 6.7 Hz, 2H), 1.91 (q, *J* = 6.3 Hz, 2H), 1.83 (q, *J* = 6.5 Hz, 2H) ppm.

**<sup>13</sup>C NMR** (100 MHz, CDCl<sub>3</sub>, 23°C, δ): 145.2, 142.5, 117.8, 99.6, 43.8, 29.8, 22.1, 19.1 ppm.

**HRMS-ESI (m/z)** calc'd for C<sub>9</sub>H<sub>11</sub>BrNO [M+H]<sup>+</sup>, 228.0015; found, 228.0019.

### Methyl 6-oxo-1,3,4,6-tetrahydro-2*H*-quinolizine-9-carboxylate (5i)

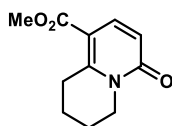

**Physical state:** White solid;

**Melting point:** 93°C;

**R<sub>f</sub>** = 0.6 (silica gel, EtOAc, v/v);

**<sup>1</sup>H NMR** (600 MHz, CDCl<sub>3</sub>, 23°C, δ): 7.90 (d, *J* = 9.7 Hz, 1H), 6.42 (d, *J* = 9.6 Hz, 1H), 4.05 (t, *J* = 6.3 Hz, 2H), 3.82 (s, 3H), 3.37 (t, *J* = 6.7 Hz, 2H), 1.93 (p, *J* = 6.5 Hz, 2H), 1.82 (p, *J* = 6.8 Hz, 2H) ppm.

**<sup>13</sup>C NMR** (100 MHz, CDCl<sub>3</sub>, 23°C, δ): 165.9, 163.1, 155.9, 139.8, 115.5, 107.7, 52.0, 42.7, 27.0, 21.5, 18.3 ppm.

**HRMS-ESI (m/z)** calc'd for C<sub>11</sub>H<sub>13</sub>NNaO<sub>3</sub> [M+Na]<sup>+</sup>, 230.0760; found, 230.0788.

### 1-Methyl-6,7,8,9-tetrahydro-4*H*-quinolizin-4-one (5j)

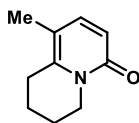

**Physical state:** yellow solid;

**Melting point:** 69°C;

**R<sub>f</sub>** = 0.5 (silica gel, EtOAc, v/v);

**<sup>1</sup>H NMR** (600 MHz, CDCl<sub>3</sub>, 23°C, δ): 7.14 (d, *J* = 9.1 Hz, 1H), 6.39 (d, *J* = 9.1 Hz, 1H), 3.99 (t, *J* = 6.2 Hz, 2H), 2.69 (t, *J* = 6.8 Hz, 2H), 2.01 (s, 3H), 1.90 (p, *J* = 6.3 Hz, 2H), 1.83 – 1.79 (m, 2H) ppm.

**<sup>13</sup>C NMR** (100 MHz, CDCl<sub>3</sub>, 23°C, δ): 163.2, 143.8, 142.2, 116.1, 112.2, 42.9, 26.4, 22.1, 19.0, 17.1 ppm.

**HRMS-ESI (m/z)** calc'd for C<sub>10</sub>H<sub>13</sub>NNaO [M+Na]<sup>+</sup>, 186.0888; found, 186.0889.



### 3,9-Dimethyl-6,7,8,9-tetrahydro-4*H*-quinolizin-4-one (5k)

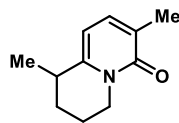

**Physical state:** yellow oil;

$R_f$  = 0.5 (silica gel, PE: EtOAc = 1:1, v/v);

$^1\text{H NMR}$  (600 MHz,  $\text{CDCl}_3$ , 23°C,  $\delta$ ) 7.15 (d,  $J$  = 6.9 Hz, 1H), 5.99 (d,  $J$  = 7.0 Hz, 1H), 4.51 (dt,  $J$  = 14.2, 5.3 Hz, 1H), 3.63 (ddd,  $J$  = 14.6, 9.4, 5.3 Hz, 1H), 2.81 (q,  $J$  = 7.8 Hz, 1H), 2.12 (s, 3H), 2.01 – 1.89 (m, 2H), 1.89 – 1.83 (m, 2H), 1.29 (d,  $J$  = 6.8 Hz, 3H) ppm.

$^{13}\text{C NMR}$  (100 MHz,  $\text{CDCl}_3$ , 23°C,  $\delta$ ): 163.6, 149.8, 136.2, 125.3, 102.7, 41.0, 32.1, 27.5, 20.6, 19.7, 17.3 ppm.

**HRMS-ESI (m/z)** calc'd for  $\text{C}_{11}\text{H}_{15}\text{NNaO}$  [ $\text{M}+\text{Na}$ ] $^+$ , 200.1058; found, 200.1046.

### 3-Methyl-7,8,9,10-tetrahydropyrido[1,2-*a*]azepin-4(6*H*)-one (5l)

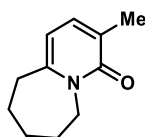

**Physical state:** yellow oil;

$R_f$  = 0.6 (silica gel, PE:EtOAc = 2:1, v/v);

$^1\text{H NMR}$  (600 MHz,  $\text{CDCl}_3$ , 23°C,  $\delta$ ): 7.05 (d,  $J$  = 6.9 Hz, 1H), 5.89 (d,  $J$  = 6.9 Hz, 1H), 4.40 – 4.34 (m, 2H), 2.75 – 2.72 (m, 2H), 2.10 (s, 3H), 1.77 – 1.73 (m, 6H) ppm.

$^{13}\text{C NMR}$  (100 MHz,  $\text{CDCl}_3$ , 23°C,  $\delta$ ): 163.7, 149.5, 136.4, 126.3, 105.0, 43.8, 35.0, 29.9, 28.0, 27.6, 17.7 ppm.

**HRMS-ESI (m/z)** calc'd for  $\text{C}_{11}\text{H}_{16}\text{NO}$  [ $\text{M}+\text{H}$ ] $^+$ , 178.1226; found, 178.1226.

### 1-Benzyl-6,7,8,9-tetrahydrooxepino[3,2-*b*]pyridin-2(1*H*)-one (5m)

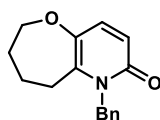

**Physical state:** green liquid;

$R_f$  = 0.4 (silica gel, PE: EtOAc = 2:1, v/v);

$^1\text{H NMR}$  (600 MHz,  $\text{CDCl}_3$ , 23°C,  $\delta$ ): 7.32 – 7.28 (m, 2H), 7.25 – 7.19 (m, 2H), 7.11 (d,  $J$  = 7.6 Hz, 2H), 6.47 (d,  $J$  = 9.6 Hz, 1H), 5.42 (s, 2H), 3.89 (t,  $J$  = 4.6 Hz, 2H), 2.81 – 2.78 (m, 2H), 1.83 (t,  $J$  = 7.9 Hz, 2H), 1.40 – 1.36 (m, 2H) ppm.

$^{13}\text{C}$  NMR (100 MHz,  $\text{CDCl}_3$ ,  $23^\circ\text{C}$ ,  $\delta$ ): 162.3, 143.3, 142.9, 137.1, 136.8, 128.9, 127.4, 126.4, 117.5, 73.4, 47.6, 31.6, 29.3, 23.2 ppm.

HRMS-ESI ( $m/z$ ) calc'd for  $\text{C}_{16}\text{H}_{18}\text{NO}_2$   $[\text{M}+\text{H}]^+$ , 256.2332; found, 256.2333.

**1,2,3,4-Tetrahydro-6H-pyrido[1,2-b]isoquinolin-6-one (5n)**

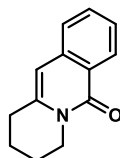

**Physical state:** White solid;

**Melting point:**  $97^\circ\text{C}$ ;

$R_f$  = 0.4 (silica gel, PE: EtOAc = 5:1, v/v);

$^1\text{H}$  NMR (600 MHz,  $\text{CDCl}_3$ ,  $23^\circ\text{C}$ ,  $\delta$ ): 8.37 (d,  $J$  = 8.3 Hz, 1H), 7.56 (t,  $J$  = 7.4 Hz, 1H), 7.40 – 7.36 (m, 2H), 6.29 (s, 1H), 4.10 (t,  $J$  = 6.4 Hz, 2H), 2.80 (t,  $J$  = 6.1 Hz, 2H), 1.96 (q,  $J$  = 6.6 Hz, 2H), 1.81 (p,  $J$  = 6.8 Hz, 2H) ppm.

$^{13}\text{C}$  NMR (100 MHz,  $\text{CDCl}_3$ ,  $23^\circ\text{C}$ ,  $\delta$ ): 163.0, 141.1, 136.9, 132.1, 127.9, 125.6, 125.0, 124.4, 103.9, 41.1, 28.9, 22.5, 19.2 ppm.

HRMS-ESI ( $m/z$ ) calc'd for  $\text{C}_{13}\text{H}_{13}\text{NNaO}$   $[\text{M}+\text{Na}]^+$ , 222.0889; found, 222.0889.

**1,2,3,4-Tetrahydro-6H-pyrido[2,1-a]isoquinolin-6-one (5o)**

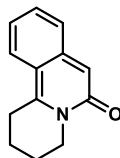

**Physical state:** White solid;

**Melting point:**  $87^\circ\text{C}$ ;

$R_f$  = 0.5 (silica gel, PE: EtOAc = 1:1, v/v);

$^1\text{H}$  NMR (600 MHz,  $\text{CDCl}_3$ ,  $23^\circ\text{C}$ ,  $\delta$ ): 8.86 (s, 1H), 8.01 (d,  $J$  = 8.7 Hz, 1H), 7.93 (d,  $J$  = 8.1 Hz, 1H), 7.67 (t,  $J$  = 8.0 Hz, 1H), 7.48 – 7.45 (m, 1H), 4.27 – 4.24 (m, 2H), 3.22 – 3.19 (m, 2H), 2.12 – 2.08 (m, 2H), 1.91 (dd,  $J$  = 7.8, 3.8 Hz, 2H) ppm.

$^{13}\text{C}$  NMR (100 MHz,  $\text{CDCl}_3$ ,  $23^\circ\text{C}$ ,  $\delta$ ): 162.7, 149.4, 137.9, 130.3, 128.4, 126.7, 125.0, 122.6, 119.2, 72.2, 31.3, 25.6, 24.6 ppm.

HRMS-ESI ( $m/z$ ) calc'd for  $\text{C}_{13}\text{H}_{14}\text{NO}$   $[\text{M}+\text{H}]^+$ , 200.1069; found, 200.1070.

## 7. Experimental procedure and characterization of radical trapping experiments

### 3-Methyl-1-(4-((2,2,6,6-tetramethylpiperidin-1-yl)oxy)butyl)pyridin-2(1H)-one (6)

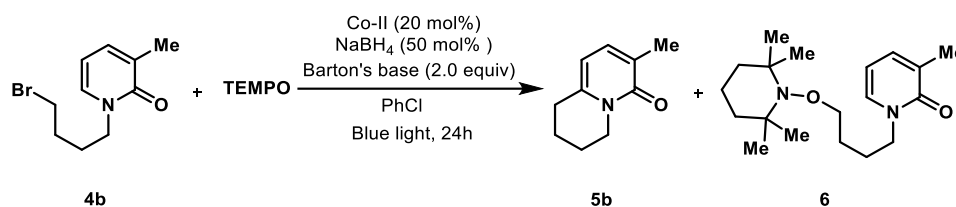

Under the argon atmosphere, a 4-mL borosilicate vial equipped with a magnetic stir bar was charged with Co(quinoline)(dmgH)<sub>2</sub>Cl (14.0 mg, 20 mol%). PhCl (1.0 mL, c = 0.1 M) and Barton's base (34.3 mg, 2.0 equiv.) were then added into the vial. Then 1-benzyl-5-(4-bromobutoxy)pyridin-2(1H)-one (33.5 mg, 0.1 mmol) and TEMPO (31.3 mg, 2.0 equiv.) were added into the same vial. The vial was sealed with a septum cap. The reaction mixture that was irradiated with the blue LED (2\*5W) was stirred at room temperature for 24 hours. No product **5b** was found by detection, and the mass spectrum of **6** is shown below (detected by HRMS).

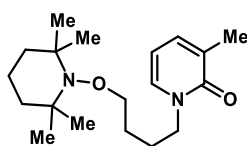

calc'd for C<sub>19</sub>H<sub>33</sub>N<sub>2</sub>O<sub>2</sub><sup>+</sup> [M+H]<sup>+</sup>, 321.2537

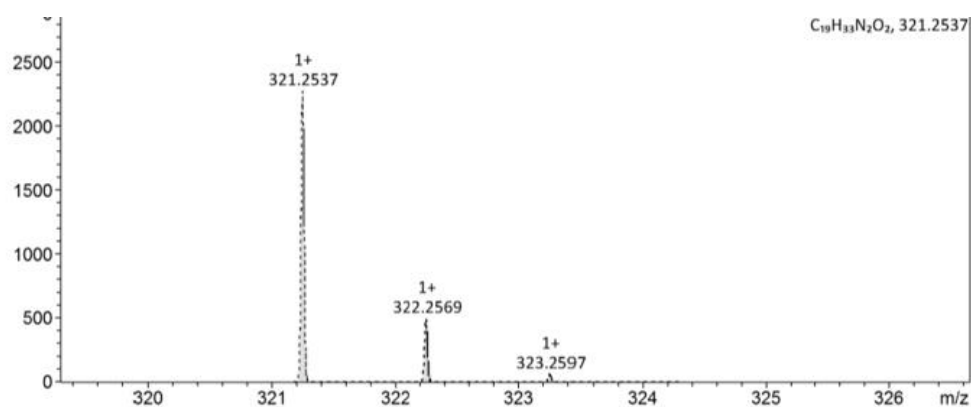

| Meas. m/z  | # | Ion Formula                                                   | Score  | m/z        | err [mDa] | err [ppm] | mSigma | rdb | e <sup>-</sup> | Conf | N-Rule | Adduct |
|------------|---|---------------------------------------------------------------|--------|------------|-----------|-----------|--------|-----|----------------|------|--------|--------|
| 321.253885 | 1 | C <sub>19</sub> H <sub>33</sub> N <sub>2</sub> O <sub>2</sub> | 100.00 | 321.253655 | -0.2      | -0.7      | n.a.   | 4.5 | even           |      | ok     | M+H    |

### (E)-3-methyl-1-(6-phenylhex-5-en-1-yl)pyridin-2(1H)-one (7)

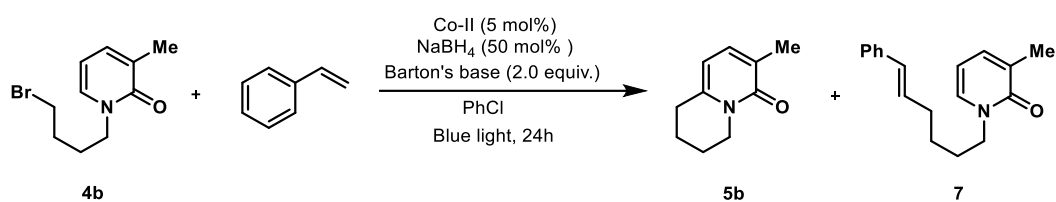

Under the argon atmosphere, a 4-mL borosilicate vial equipped with a magnetic stir bar was charged with Co(quinoline)(dmgH)<sub>2</sub>Cl (3.5 mg, 5 mol%) PhCl (1.0 mL, c = 0.1 M) and Barton's base (34.3 mg, 2.0 equiv.) were then added into the vial. Then 1-(4-bromobutyl)-3-methylpyridin-2(1*H*)-one (24.4 mg, 0.1 mmol) and styrene (20.8mg, 0.2 equiv.) were added into the same vial. The vial was sealed with a septum cap. The reaction mixture that was irradiated with the blue LED (2\*5W) was stirred at room temperature for 24 hours. Then the reaction mixture was transferred to a flask with ethyl acetate, and the volatiles were removed under vacuo. The residues were then purified by flash column chromatography on silica gel, eluting with hexanes to afford **5b** (6.5 mg, 40%) as a yellow oil and **7** (6.4 mg, 24%).

**Physical state:** yellow oil;

$R_f$  = 0.7 (silica gel, PE:EtOAc = 2:1, v/v);

<sup>1</sup>H NMR (600 MHz, CDCl<sub>3</sub>, 23°C, δ): 7.34 – 7.32 (m, 2H), 7.30 – 7.27 (m, 2H), 7.20 – 7.17 (m, 2H), 7.12 (dd, *J* = 6.9, 2.1 Hz, 1H), 6.39 – 6.36 (m, 1H), 6.19 (dt, *J* = 15.8, 7.0 Hz, 1H), 6.07 (t, *J* = 6.7 Hz, 1H), 3.96 (t, *J* = 7.4 Hz, 2H), 2.26 (qd, *J* = 7.2, 1.5 Hz, 2H), 2.15 (s, 3H), 1.84 – 1.79 (m, 2H), 1.56 – 1.51 (m, 2H) ppm.

<sup>13</sup>C NMR (100 MHz, CDCl<sub>3</sub>, 23°C, δ): 163.1, 137.8, 136.6, 135.0, 130.5, 130.3, 130.2, 128.6, 127.1, 126.1, 105.7, 50.0, 32.8, 29.0, 26.6, 17.4 ppm.

HRMS-ESI (*m/z*) calc'd for C<sub>18</sub>H<sub>21</sub>NNaO [M+Na]<sup>+</sup>, 290.1515; found, 290.1515.

## 8. Experimental procedure and characterization of synthetic applications

### 2-Bromo-6,7,8,9-tetrahydro-4*H*-quinolizin-4-one (**5g**)

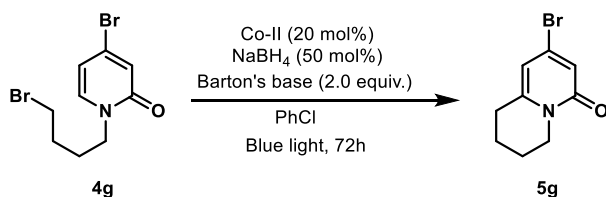

Under the argon atmosphere, a 250-mL borosilicate vial equipped with a magnetic stir bar was charged with Co(quinoline)(dmgH)<sub>2</sub>Cl (476 mg, 10 mol%). PhCl (68.0 mL, c = 0.1 M) and Barton's base (1.2 g, 2.0 equiv.) were then added into the vial. Then **4g**

(6.8 mmol) were added into the same vial. The vial was sealed with a septum cap. The reaction mixture that was irradiated with the blue LED (2\*5W) was stirred at room temperature for 36 hours. Then add Co(quinoline)(dmgH)<sub>2</sub>Cl (476 mg, 10 mol%) again with the blue LED (2\*5W) was stirred at room temperature for 36 hours. the reaction mixture was transferred to a flask with ethyl acetate, and the volatiles were removed under vacuo. The residues were then purified by flash column chromatography on silica gel, eluting with hexanes to afford **5g** (1.35g, 87%).

### 2-(3,4-Dimethoxyphenyl)-6,7,8,9-tetrahydro-4H-quinolizin-4-one (**8**)

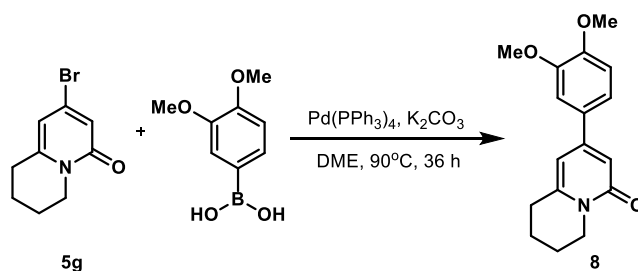

2-Bromo-6,7,8,9-tetrahydro-4H-quinolizin-4-one (**5g**, 1.35 g, 5.9 mmol) dissolved in ethylene glycol dimethyl ether (30 mL). Add (3,4-dimethoxyphenyl)boronic acid (1.2 equiv.) and K<sub>2</sub>CO<sub>3</sub> (4.0 equiv.), Then tetrakis(triphenylphosphine)palladium (0.1 equiv.) was added. The resulting mixture was stirred at 90°C for 36 hours under a nitrogen atmosphere. TLC analysis indicated that the reaction was over. The reaction solution was cooled to room temperature. The mixture was extracted with methylene chloride, concentrated, and separated by chromatography to give compound **8** (1.32g, 78%).<sup>[18]</sup>

**Physical state:** White solid;

**Melting point:** 93°C;

**R<sub>f</sub>** = 0.5 (silica gel, EtOAc);

**<sup>1</sup>H NMR** (600 MHz, CDCl<sub>3</sub>, 23°C, δ): 7.15 (dd, *J* = 8.4, 2.1 Hz, 1H), 7.08 (d, *J* = 2.1 Hz, 1H), 6.91 (d, *J* = 8.3 Hz, 1H), 6.64 – 6.63 (m, 1H), 6.26 – 6.25 (m, 1H), 4.02 (t, *J* = 6.4 Hz, 2H), 3.92 (s, 3H), 3.91 (s, 3H), 2.84 (t, *J* = 6.7 Hz, 2H), 1.96 (q, *J* = 6.5 Hz, 2H), 1.82 (q, *J* = 6.6 Hz, 2H) ppm.

**<sup>13</sup>C NMR** (100 MHz, CDCl<sub>3</sub>, 23°C, δ): 163.9, 150.6, 150.2, 149.3, 147.4, 130.6, 119.5, 112.5, 111.4, 109.8, 104.6, 56.1, 41.7, 29.2, 22.4, 19.0 ppm.

**HRMS-ESI (m/z)** calc'd for C<sub>17</sub>H<sub>20</sub>NO<sub>3</sub> [M+H]<sup>+</sup>, 286.1437; found, 286.1438.

### 2-(3,4-Dimethoxyphenyl)-3-iodo-6,7,8,9-tetrahydro-4H-quinolizin-4-one (**9**)

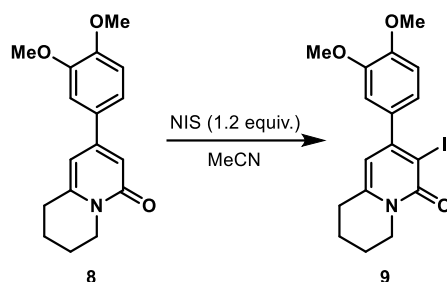

2-(3,4-Dimethoxyphenyl)-6,7,8,9-tetrahydro-4*H*-quinolizin-4-one (**8**, 1.32 g, 4.6 mmol) dissolved in MeCN (10 mL). Add NIS (1.2 equiv.), The resulting mixture was stirred at room temperature for 12 hours. TLC analysis indicated that the reaction was over, the mixture was extracted with methylene chloride, concentrated, and separated by chromatography to give compound **9** (1.43 g, 75%).<sup>[19]</sup>

**Physical state:** orange solid;

**Melting point:** 88°C;

**R<sub>f</sub>** = 0.5 (silica gel, PE: EtOAc = 1:1, v/v);

**<sup>1</sup>H NMR** (600 MHz, CDCl<sub>3</sub>, 23°C, δ): 6.90 (d, *J* = 1.8 Hz, 3H), 6.03 (s, 1H), 4.07 (t, *J* = 6.4 Hz, 2H), 3.91 (s, 3H), 3.90 (s, 3H), 2.77 (t, *J* = 6.7 Hz, 2H), 1.97 (m, 2H), 1.82 (m, 2H) ppm.

**<sup>13</sup>C NMR** (100 MHz, CDCl<sub>3</sub>, 23°C, δ): 177.7, 161.1, 156.8, 149.1, 148.4, 146.6, 135.1, 120.7, 111.8, 110.7, 107.7, 56.1, 43.9, 29.7, 28.6, 22.5, 18.7 ppm.

**HRMS-ESI (m/z)** calc'd for C<sub>17</sub>H<sub>18</sub>INNaO<sub>3</sub> [M+Na]<sup>+</sup>, 434.0221; found, 434.0224.

### 2-(3,4-Dimethoxyphenyl)-3-(4-methoxyphenyl)-6,7,8,9-tetrahydro-4*H*-quinolizin-4-one (**11**)

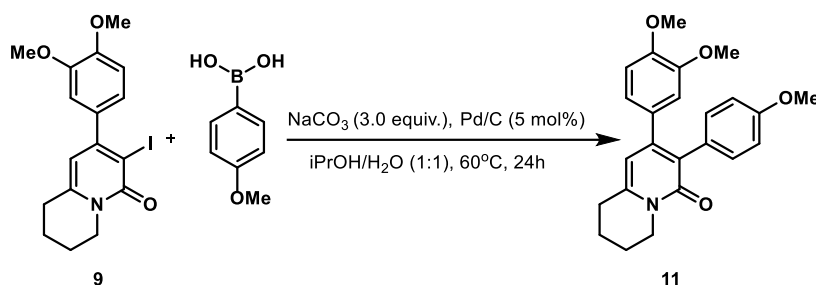

Na<sub>2</sub>CO<sub>3</sub> (3.0 equiv.), (4-methoxyphenyl)boronic acid (1.2 equiv.), and Pd/C (5 mol%) were added to a solution of 2-(3,4-dimethoxyphenyl)-3-iodo-6,7,8,9-tetrahydro-4*H*-quinolizin-4-one (**9**, 1.43 g, 3.45 mmol) in iPrOH (6 mL) and H<sub>2</sub>O (6 mL). The resulting mixture was stirred for 24 h at 60°C and then filtered. The catalyst was washed with H<sub>2</sub>O (9 mL) and CH<sub>2</sub>Cl<sub>2</sub> (15 mL). The aqueous phase was extracted twice with

CH<sub>2</sub>Cl<sub>2</sub>. The collected organic extracts were dried (MgSO<sub>4</sub>), filtered, and concentrated under reduced pressure. The crude compound was purified by flash chromatography to give the cross-coupled product **11** (1.36g, 81%).<sup>[20]</sup>

**Physical state:** White solid;

**Melting point:** 97°C;

**R<sub>f</sub>** = 0.6 (silica gel, EtOAc);

**<sup>1</sup>H NMR** (600 MHz, CDCl<sub>3</sub>, 23°C, δ): 7.09 – 7.07 (m, 2H), 6.80 (dd, *J* = 8.3, 2.0 Hz, 1H), 6.75 (dd, *J* = 8.5, 4.7 Hz, 3H), 6.49 (d, *J* = 2.0 Hz, 1H), 6.14 (s, 1H), 4.06 (t, *J* = 6.4 Hz, 2H), 3.85 (s, 3H), 3.75 (s, 3H), 3.53 (s, 3H), 2.85 (t, *J* = 6.9 Hz, 2H), 2.01 (q, *J* = 6.4 Hz, 2H), 1.85 (p, *J* = 6.6 Hz, 2H) ppm.

**<sup>13</sup>C NMR** (100 MHz, CDCl<sub>3</sub>, 23°C, δ): 163.2, 158.4, 148.5, 148.4, 148.2, 145.3, 132.4, 132.3, 129.0, 125.3, 121.4, 113.5, 113.1, 110.7, 107.4, 55.9, 55.7, 55.3, 42.4, 29.1, 22.6, 19.0 ppm.

**HRMS-ESI (m/z)** calc'd for C<sub>24</sub>H<sub>25</sub>NNaO<sub>4</sub> [M+Na]<sup>+</sup>, 414.1672; found, 414.1676.

## 9. References

- [1] M. Matsumoto, M. Yamada, N. Watanabe, Reversible 1, 4-cycloaddition of singlet oxygen to N-substituted 2-pyridones: 1, 4-endoperoxide as a versatile chemical source of singlet oxygen, *Chem. Commun.*, 2005, 483-485.
- [2] W. Long, W. Qiu, C. Guo, C. Li, L. Song, G. Bai, G. Zhang, H. He, M. L. Kuznetsov, A Copper-Based Metal-Organic Framework as an Efficient and Reusable Heterogeneous Catalyst for Ullmann and Goldberg Type C–N Coupling Reactions, *Molecules*, 2015, **20**, 21178-21192.
- [3] J. Chen, M. M. Lu, B. Liu, Z. Chen, Q. Bin Li, L. J. Tao, G. Y. Hu, Synthesis and structure–activity relationship of 5-substituent-2 (1*H*)-pyridone derivatives as anti-fibrosis agents, *Bioorg. Med. Chem. Lett.*, 2012, **22**, 2300-2302.
- [4] N. C. Becknell, J. A. Lyons, L. D. Aimone, J. A. Gruner, J. R. Mathiasen, R. Raddatz, R. L. Hudkins, Synthesis and evaluation of pyridone-phenoxypropyl-R-2-methylpyrrolidine analogues as histamine H3 receptor antagonists, *Bioorg. Med. Chem. Lett.*, 2011, **21**, 7076-7080.
- [5] B. Feng, Y. Li, H. Li, X. Zhang, H. Xie, H. Cao, L. Yu, Q. Xu, Specific N-Alkylation of Hydroxypyridines Achieved by a Catalyst-and Base-Free Reaction with Organohalides, *J. Org. Chem.*, 2018, **83**, 6769-6775.
- [6] B. Xu, Z. Cheng, L. Fu, A facile synthesis of novel tricyclic 4-pyridones, *Tetrahedron Lett.*, 2014, **55**, 7194-7197.
- [7] X. Marset, A. Khoshnood, L. Sotorríos, E. Gómez-Bengoa, D. A. Alonso, D. J. Ramón, Deep Eutectic Solvent Compatible Metallic Catalysts: Cationic Pyridiniophosphine Ligands in Palladium Catalyzed Cross-Coupling Reactions, *ChemCatChem*, 2017, **9**, 1269-1275.
- [8] M. Reyes-Batlle, M. B. Freijo, A. López-Arencibia, J. Lorenzo-Morales, G. McNaughton-Smith, J. E. Piñero, T. Abad-Grillo, Identification of N-acyl quinolin-2 (1*H*)-ones as new selective agents against clinical isolates of *Acanthamoeba keratitis*, *Bioorg. Chem.*, 2020, **99**, 103791.
- [9] S. M. Smith, J. M. Takacs, Amide-Directed Catalytic Asymmetric Hydroboration of Trisubstituted Alkenes, *J. Am. Chem. Soc.*, 2010, **132**, 1740-1741.
- [10] M. J. Porter, M. J. Porter, Selective Conversion of Alcohols into Alkyl Iodides Using a Thioiminium Salt, *J. Org. Chem.*, 2009, **74**, 7982-7985.
- [11] M. Jarończyk, K. Wołosewicz, M. Gabrielsen, G. Nowak, I. Kufareva, A. P. Mazurek, A. W. Ravana, R. Abagyan, A. J. Bojarski, I. Sylte and Z. Chilmonczyk, Synthesis, in vitro binding studies and docking of long-chain arylpiperazine nitroquipazine analogues, as potential serotonin transporter inhibitors, *Eur. J. Med. Chem.*, 2012, **49**, 200-210.
- [12] Toshima, H. Nara, S. J. Aramaki, H. Ichihara, A. Koda, Y. Kikuta, Yoshio, Efficient syntheses of the OPC homologous series, OPC-1:0, -3:0, -4:0, -5:0, -6:0, -7:0, and -8:0, *Biosci. Biotechnol. Biochem.*, 1997, **61**, 1724-1728.
- [13] Y. Kanaoka, O. Yonemitsu, K. Tanizawa, NII-Electronic Library Service, *Chem. Pharm. Bull.*, 1964, **12**, 773-778.



- [14] R. M. N. Kalla, J. Lim, J. Bae and I. Kim, Sulfated choline ionic liquid-catalyzed acetamide synthesis by grindstone method, *Tetrahedron Lett.*, 2017, **58**, 1595-1599.
- [15] E. Falb, K. Ulanenko, A. Tor, R. Gottesfeld, M. Weitman, M. Afri, H. Gottlieb and A. Hassner, A Highly Efficient Suzuki-Miyaura Methylation of Pyridines Leading to the Drug Pirfenidone and to its CD<sub>3</sub> Version (SD-560), *Green Chem.*, 2017, **19**, 5046-5053.
- [16] L. Huang, Z. Luo, F. He, J. Lu and X. Li, Synthesis and biological evaluation of a new series of berberine derivatives as dual inhibitors of acetylcholinesterase and butyrylcholinesterase, *Bioorg. Med. Chem.*, 2010, **18**, 4475-4484.
- [17] J. Wysocki, C. Schlepfforst, F. Glorius, Asymmetric Homogeneous Hydrogenation of 2-Pyridones, *Synlett*, 2015, **26**, 1557-1562.
- [18] M. H. Cui, H. S. Kim, Synthetic Approach to the Chemical Isostere of O-Methyl Honokiol, *Synlett*, 2012, 311-313.
- [19] E. Bossharth, P. Desbordes, N. Monteiro, and G. Balme, Palladium-Mediated Three-Component Synthesis of Furo[2,3-b]pyridones by One-Pot Coupling of 3-Iodopyridones, Alkynes, and Organic Halides, *Org. Lett.*, 2003, **14**, 2441-2444.
- [20] M. Lamblin, H. Bares, J. Dessolin, C. Marty, N. Bourgougnon, and F.-X. Felpin, Practical Pd/C-Catalysed Suzuki-Miyaura Reactions for the Preparation of 3-Aryl-4-oxypyridin-2(1H)-ones, 3-Aryl-2,4-oxypyridines and 3-Aryl-2,4-oxyquinolines as Useful Intermediates for the Synthesis of Biologically Active Compound, *Eur. J. Org. Chem.*, 2012, **28**, 5525-5533.

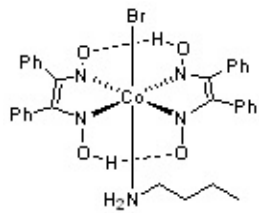

Co-I

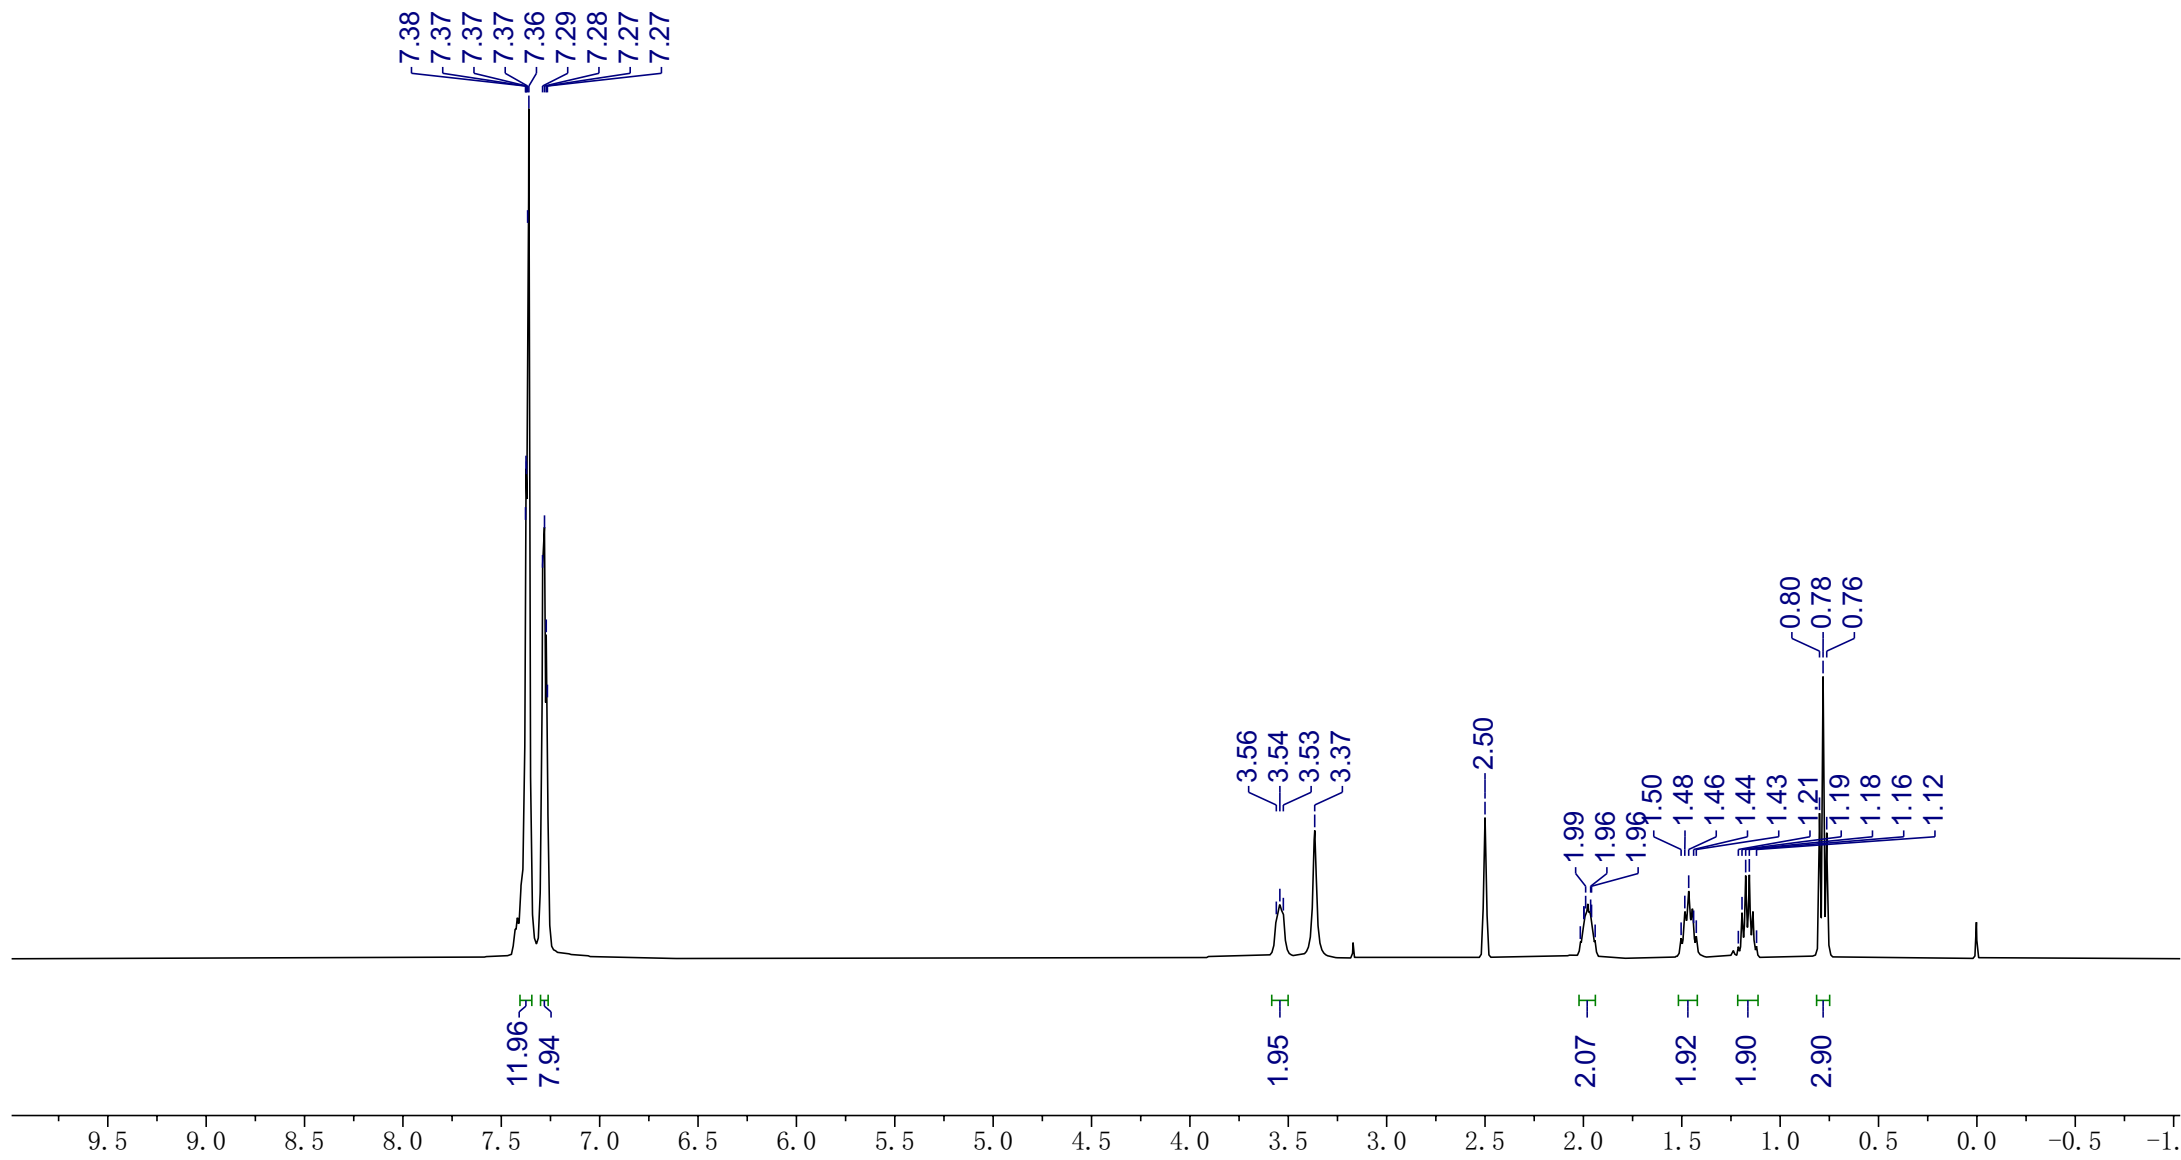

400 MHz, DMSO

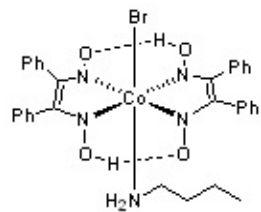

Co-I

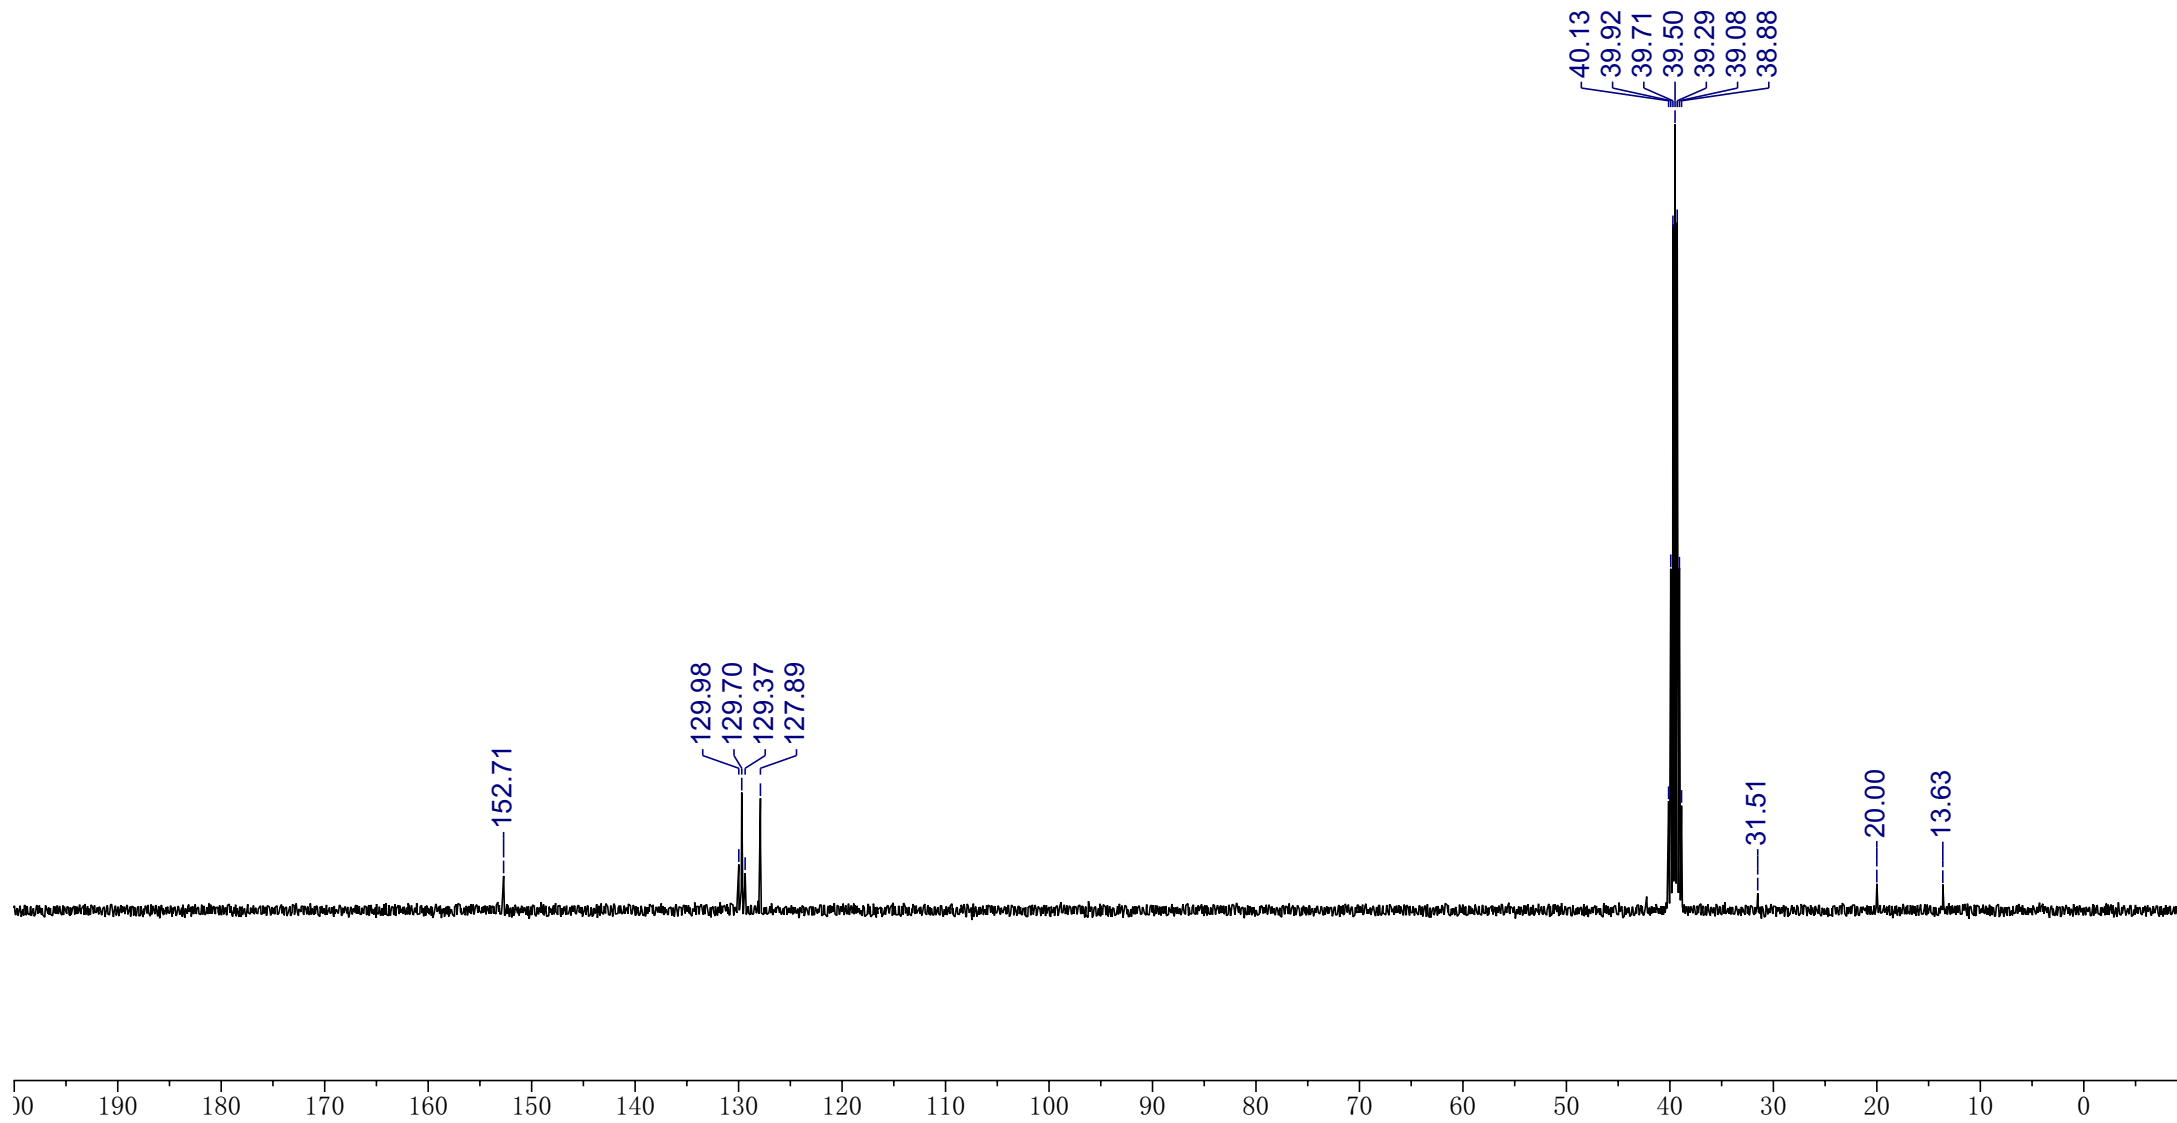

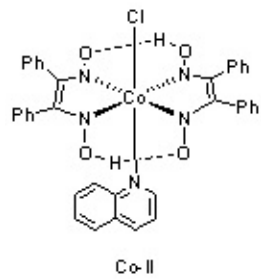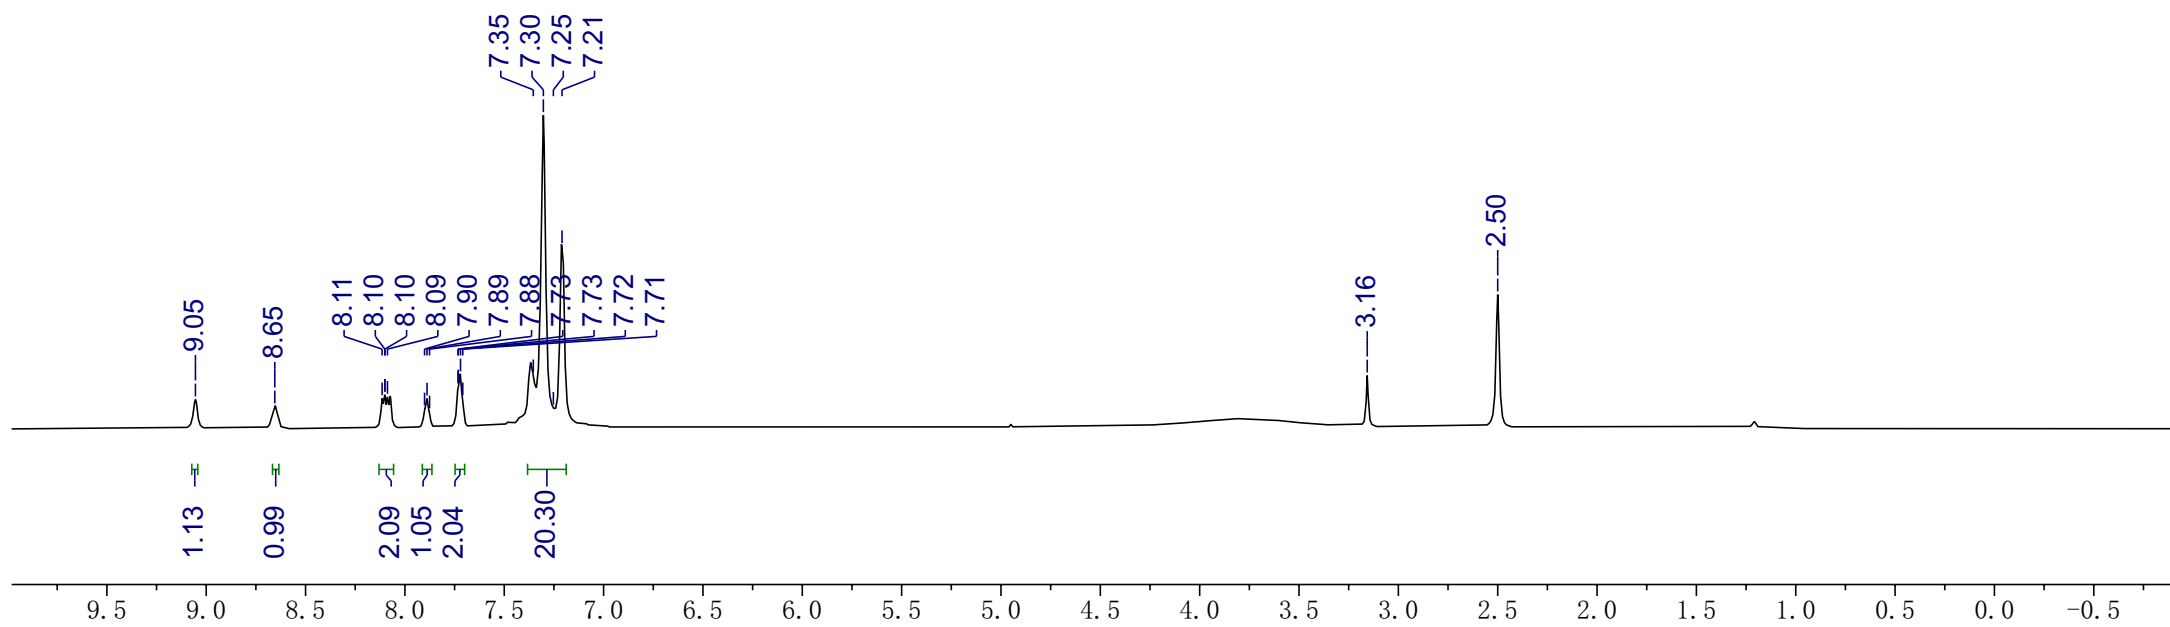

400 MHz, DMSO

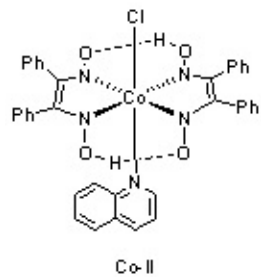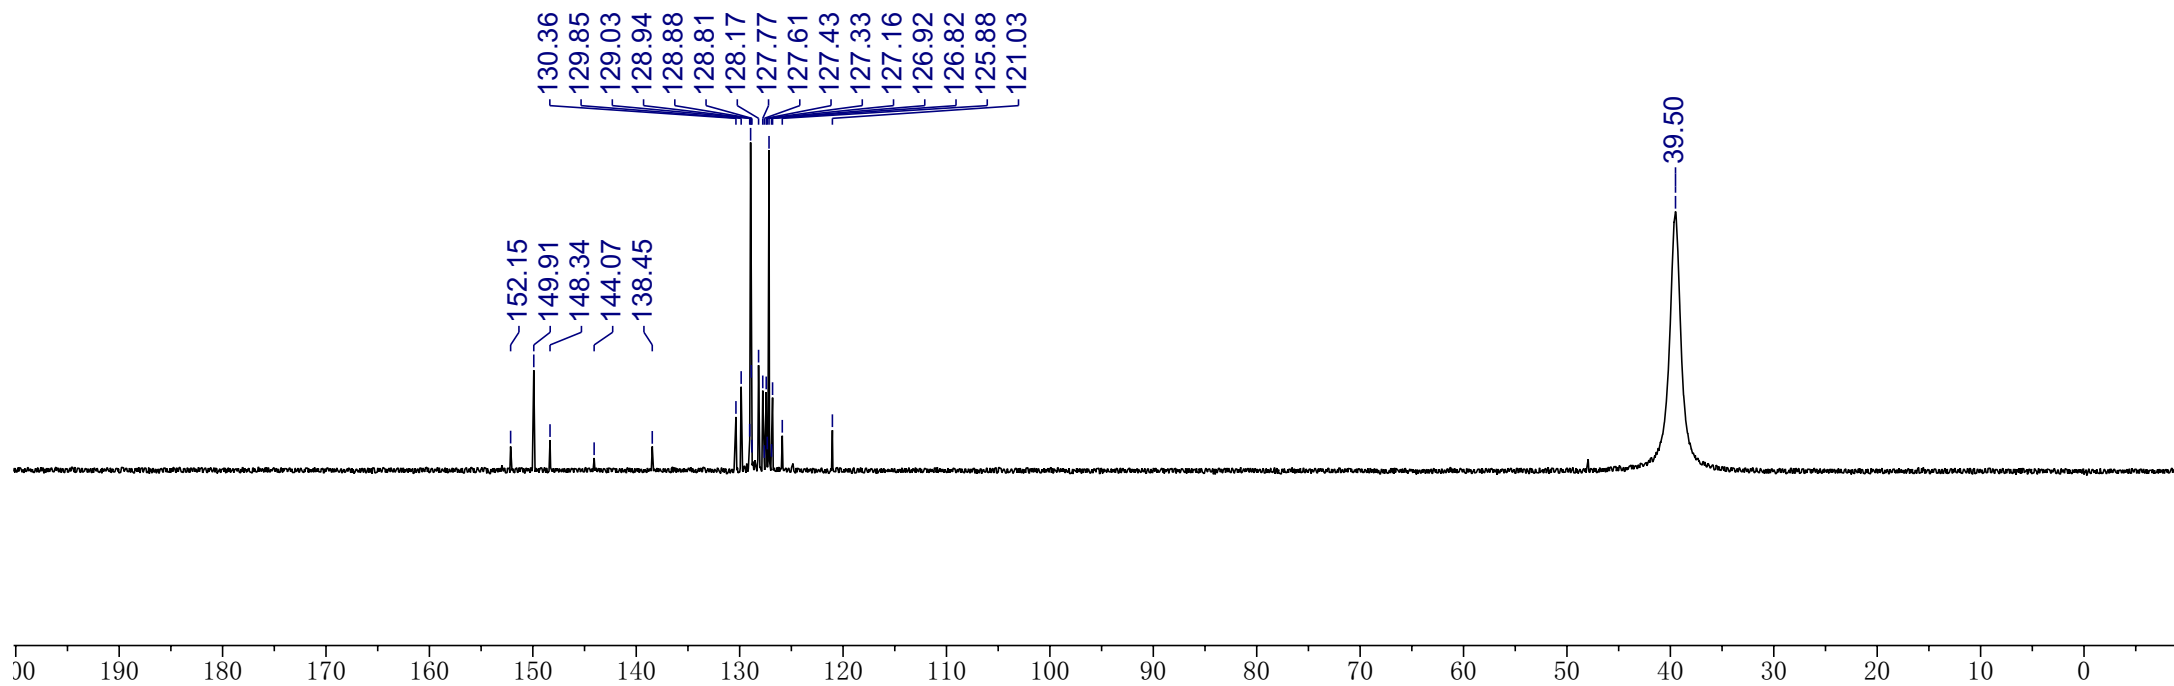

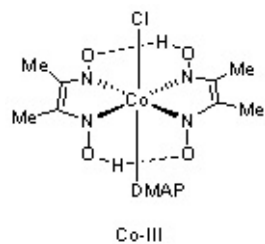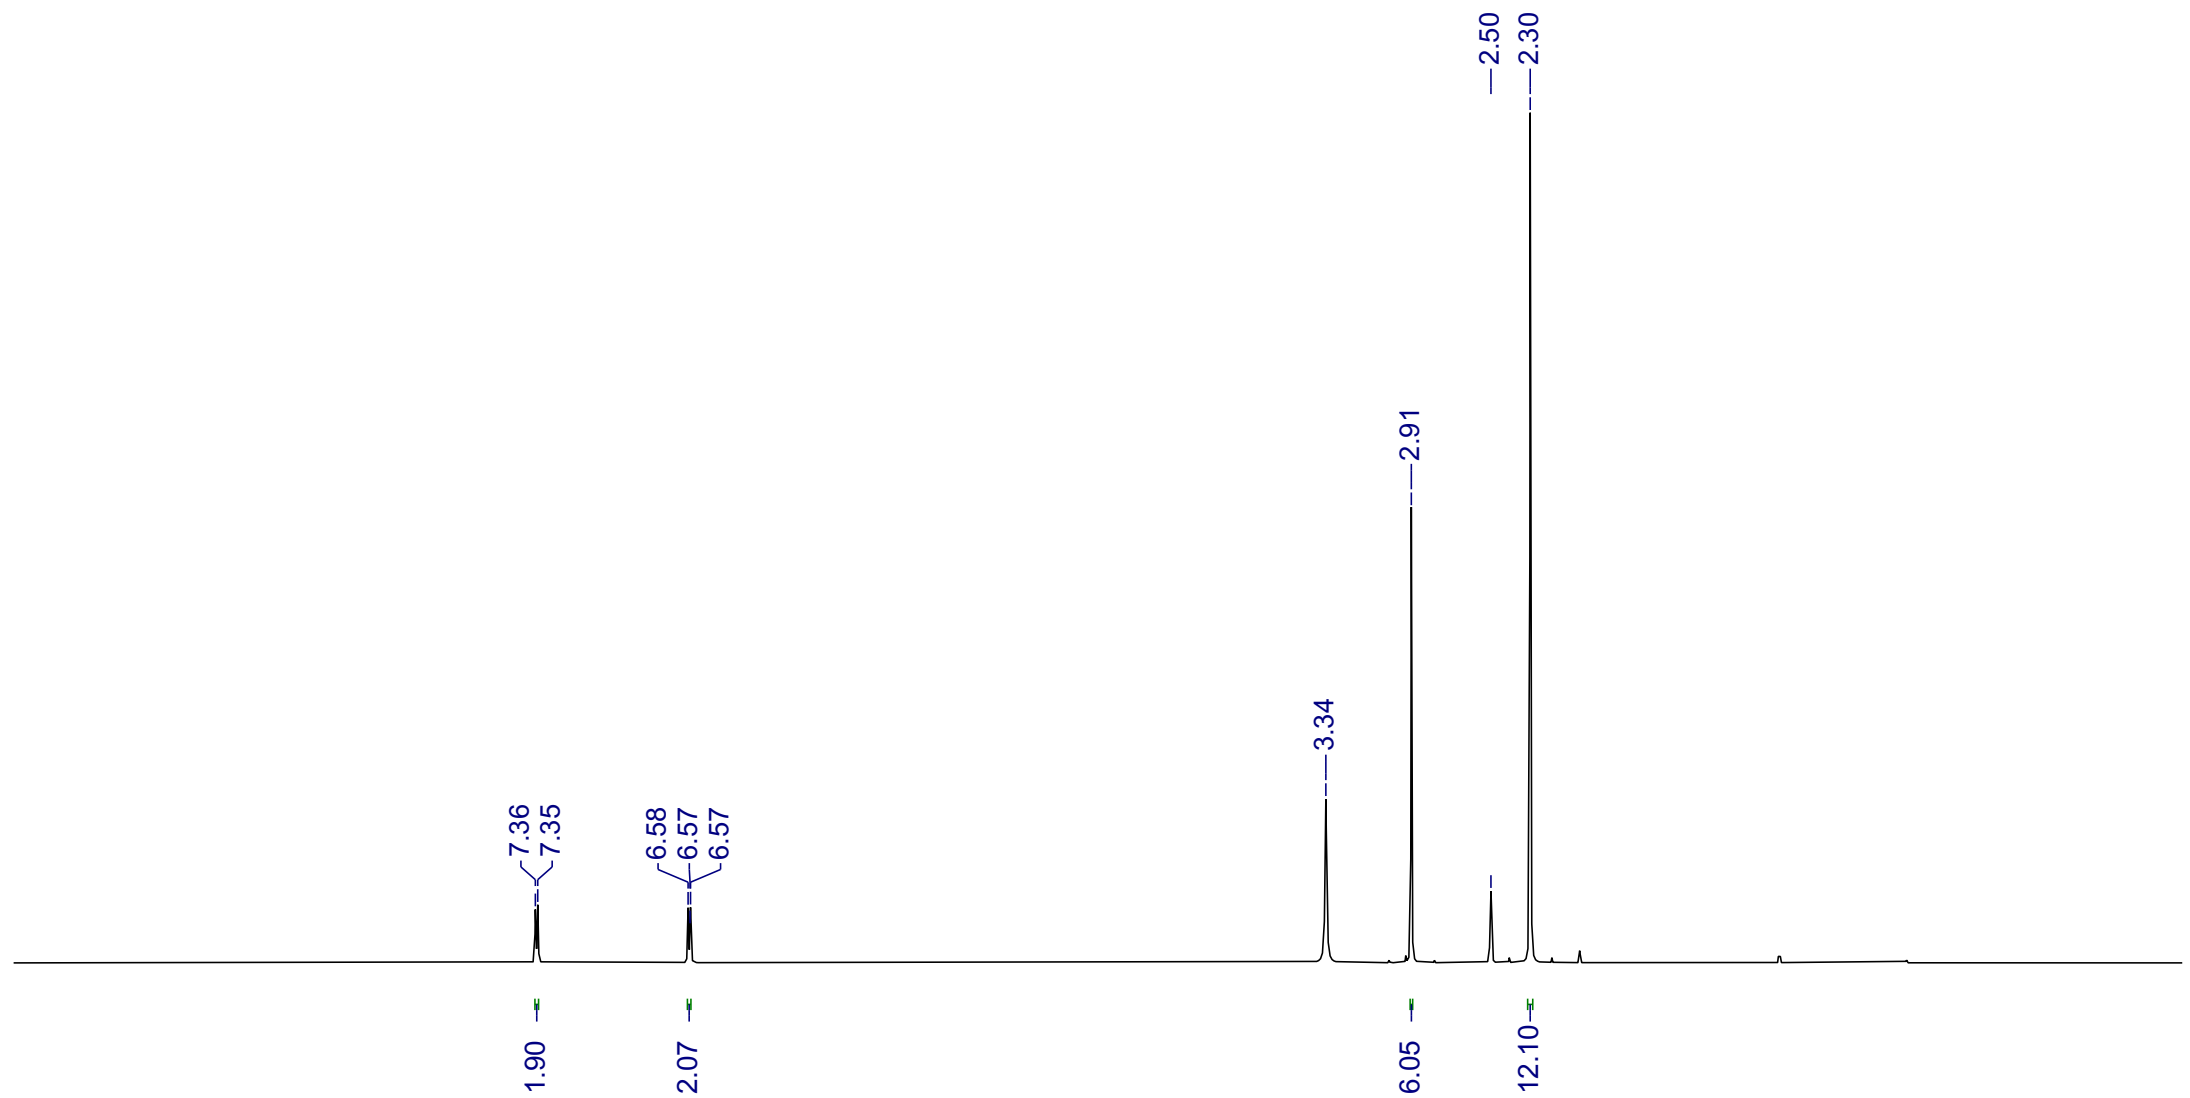

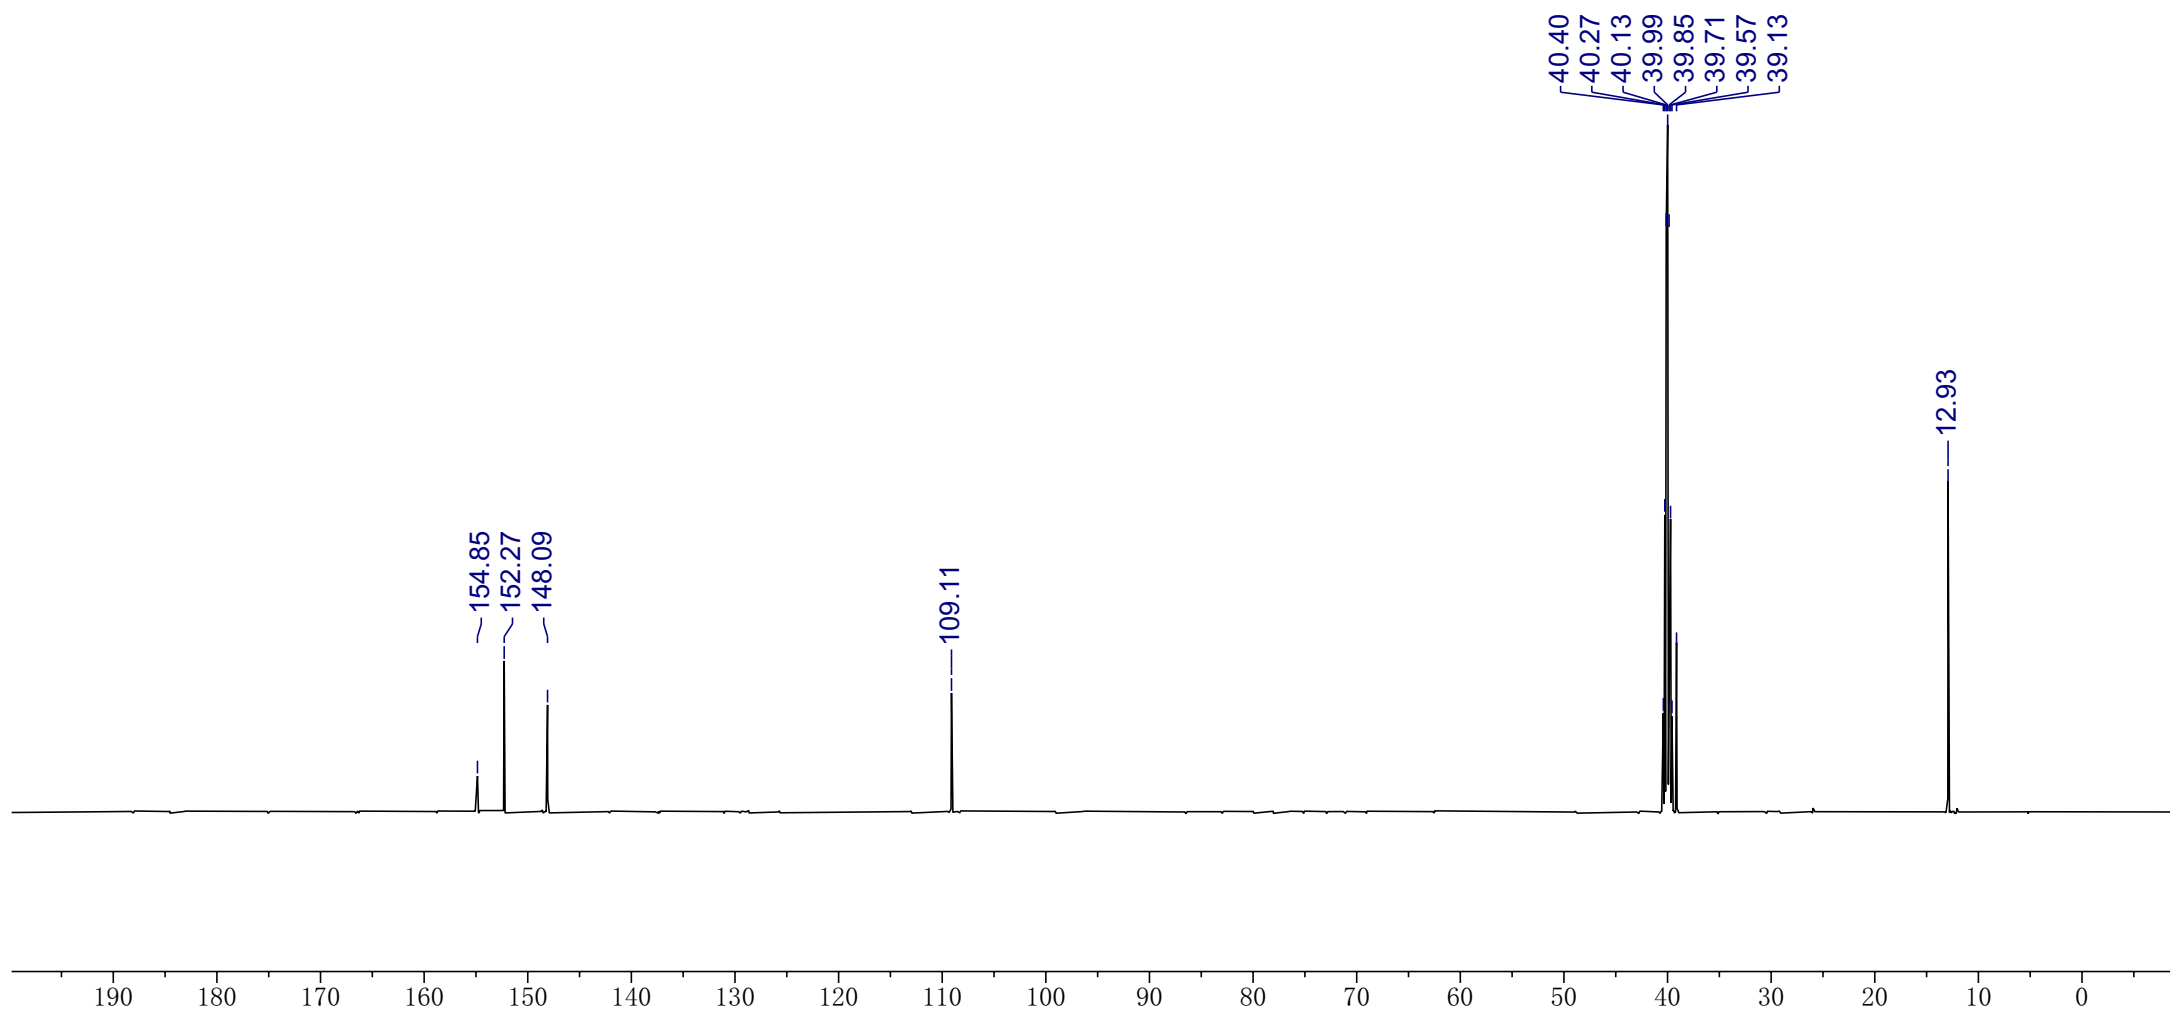

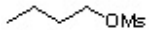

2a'

400 MHz, CDCl<sub>3</sub>

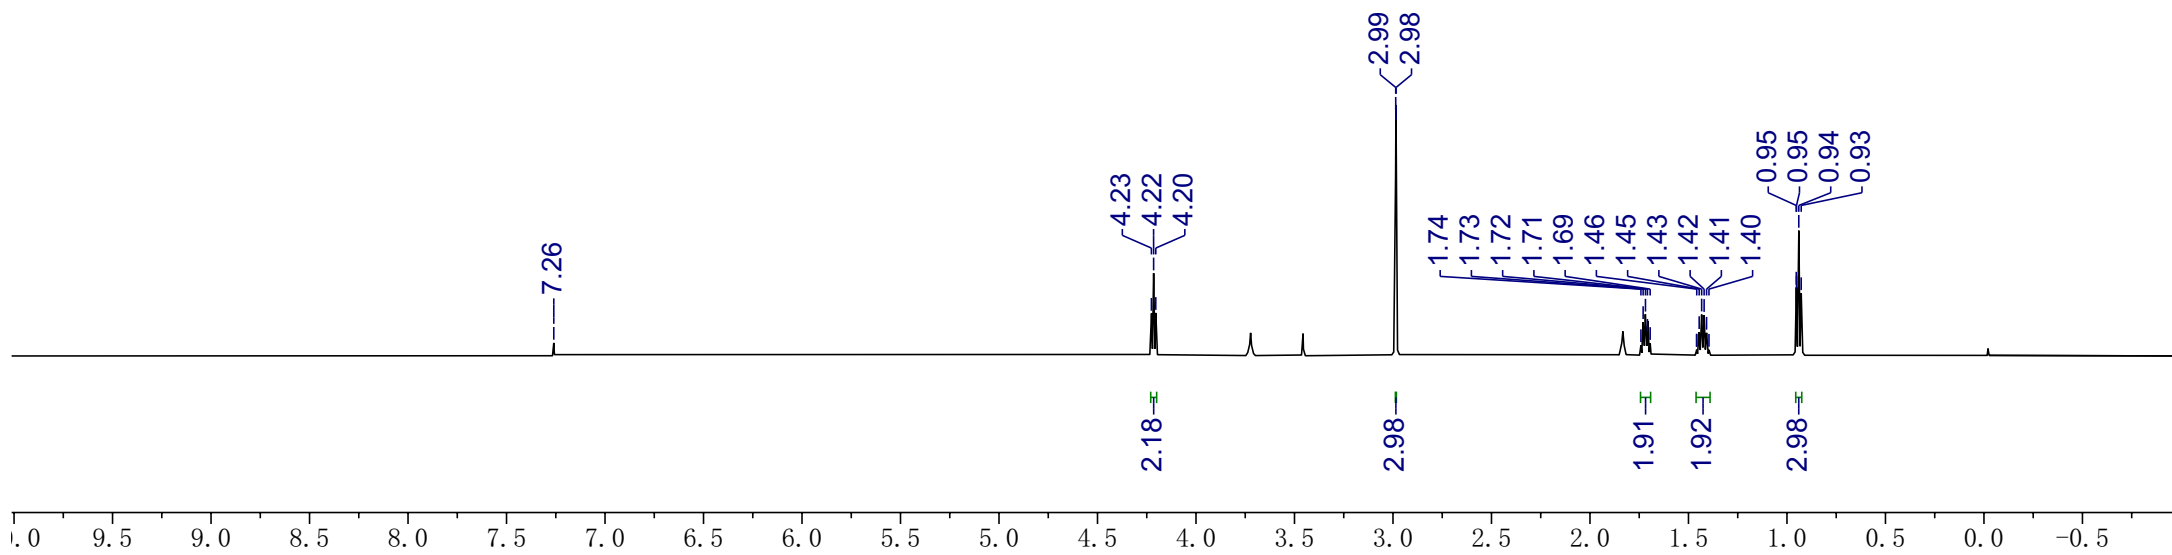



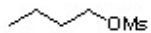

2a'

400 MHz, CDCl<sub>3</sub>

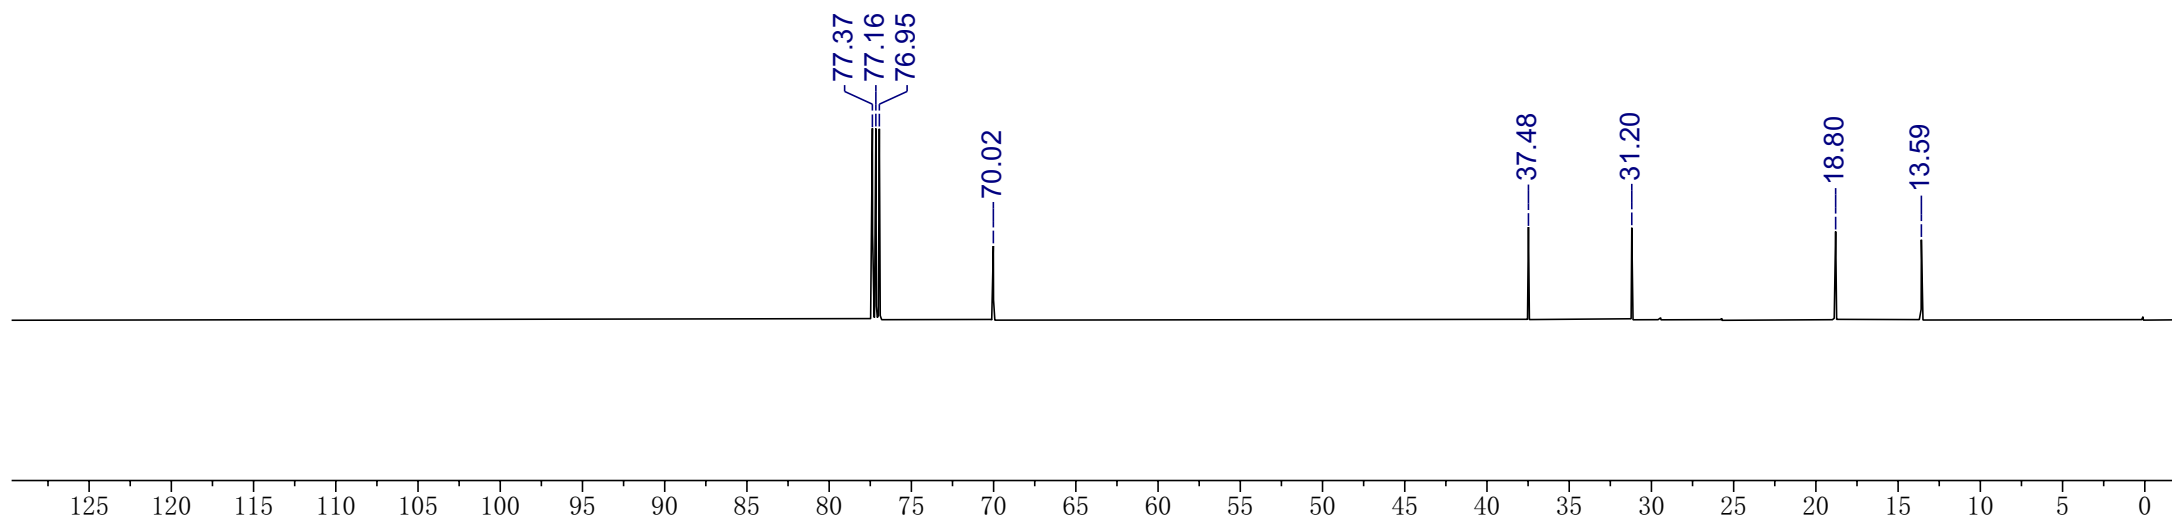

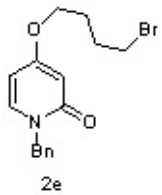

400 MHz, CDCl<sub>3</sub>

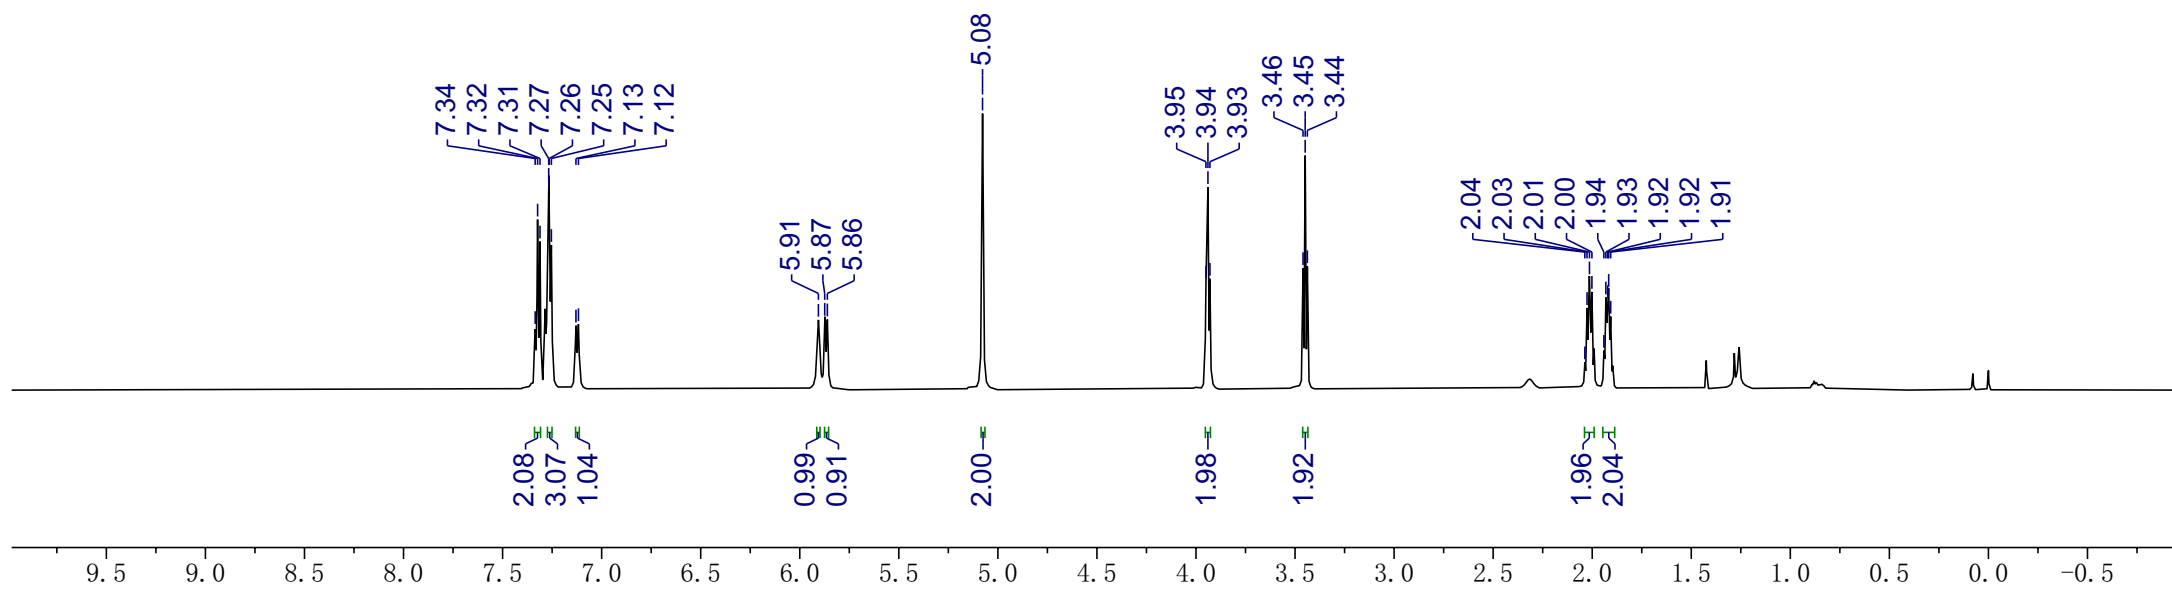

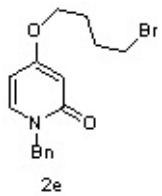

400 MHz, CDCl<sub>3</sub>

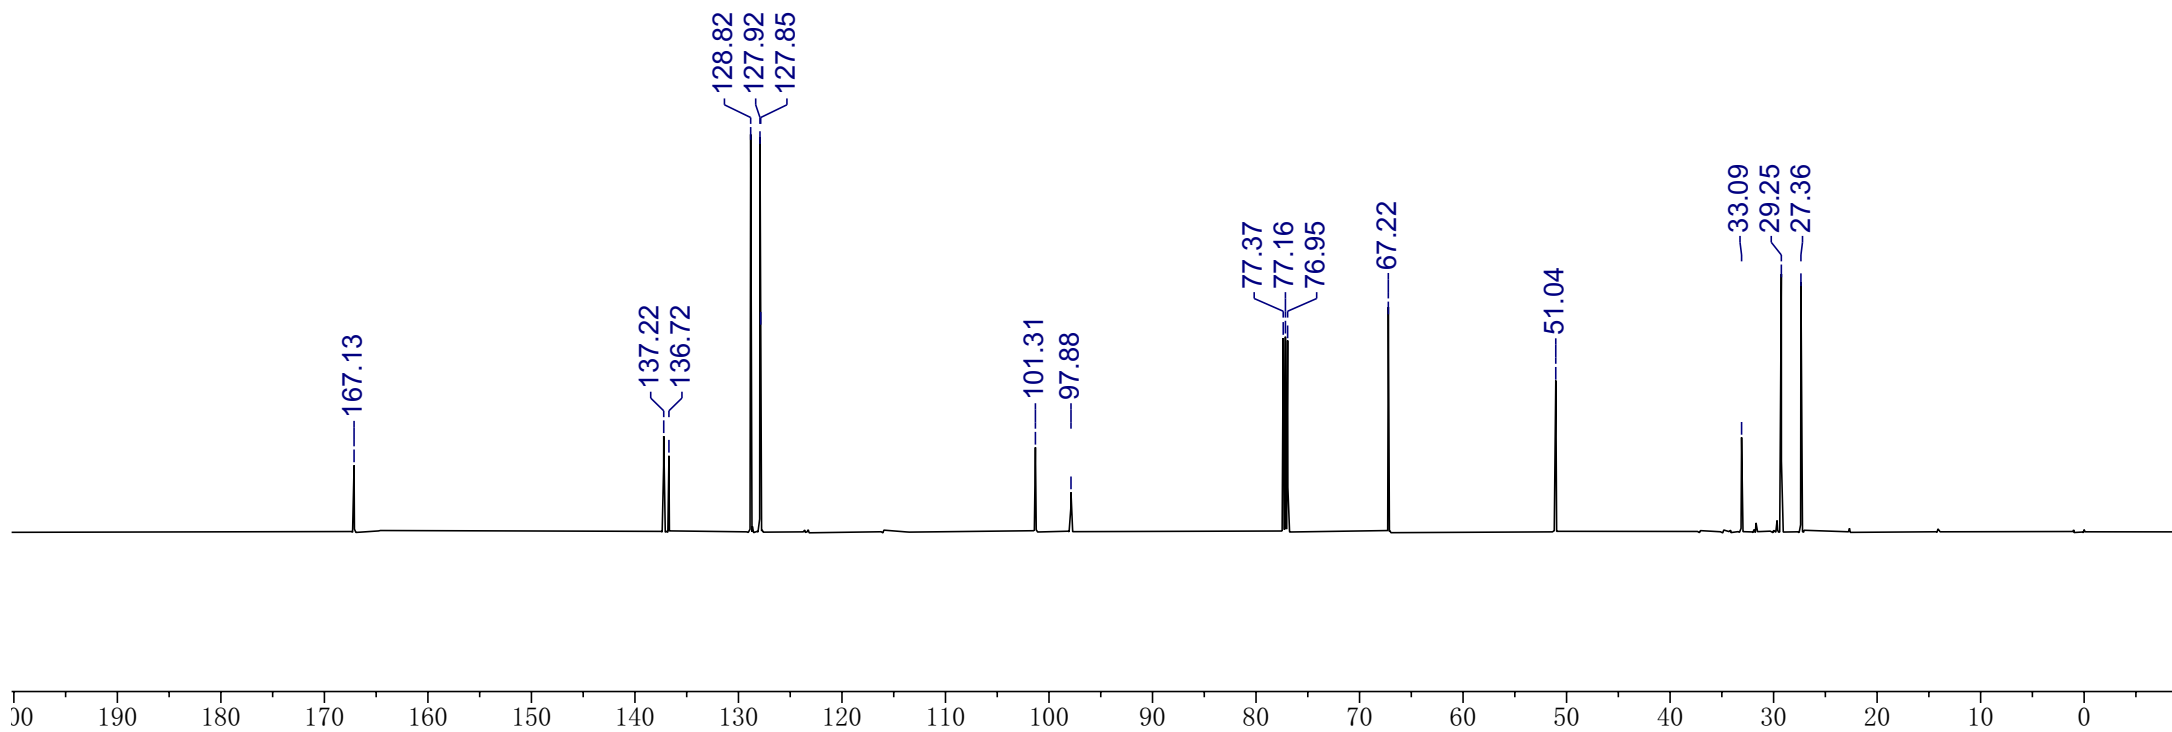

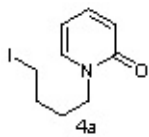

400 MHz, CDCl<sub>3</sub>

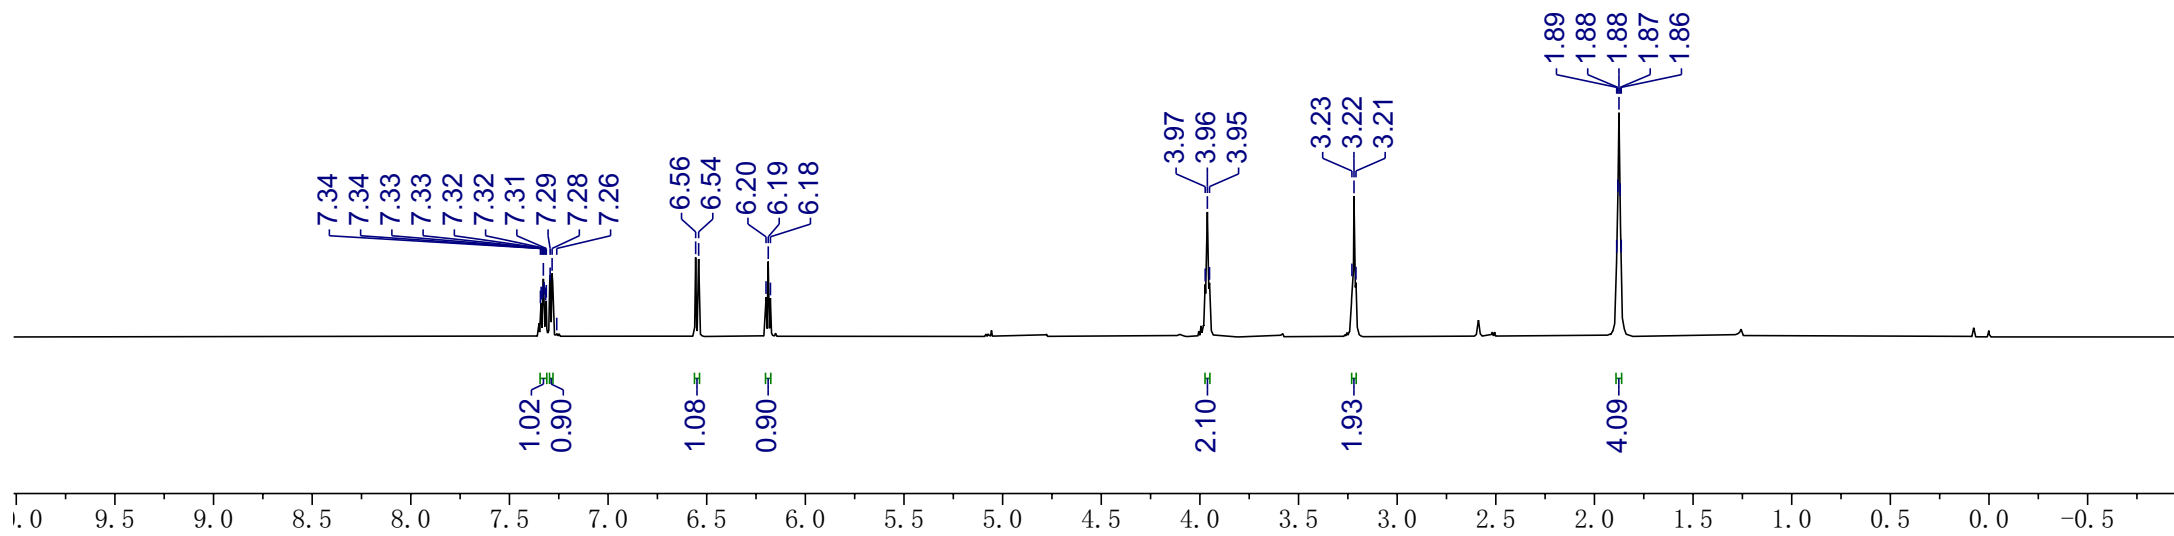

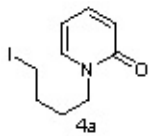

400 MHz, CDCl<sub>3</sub>

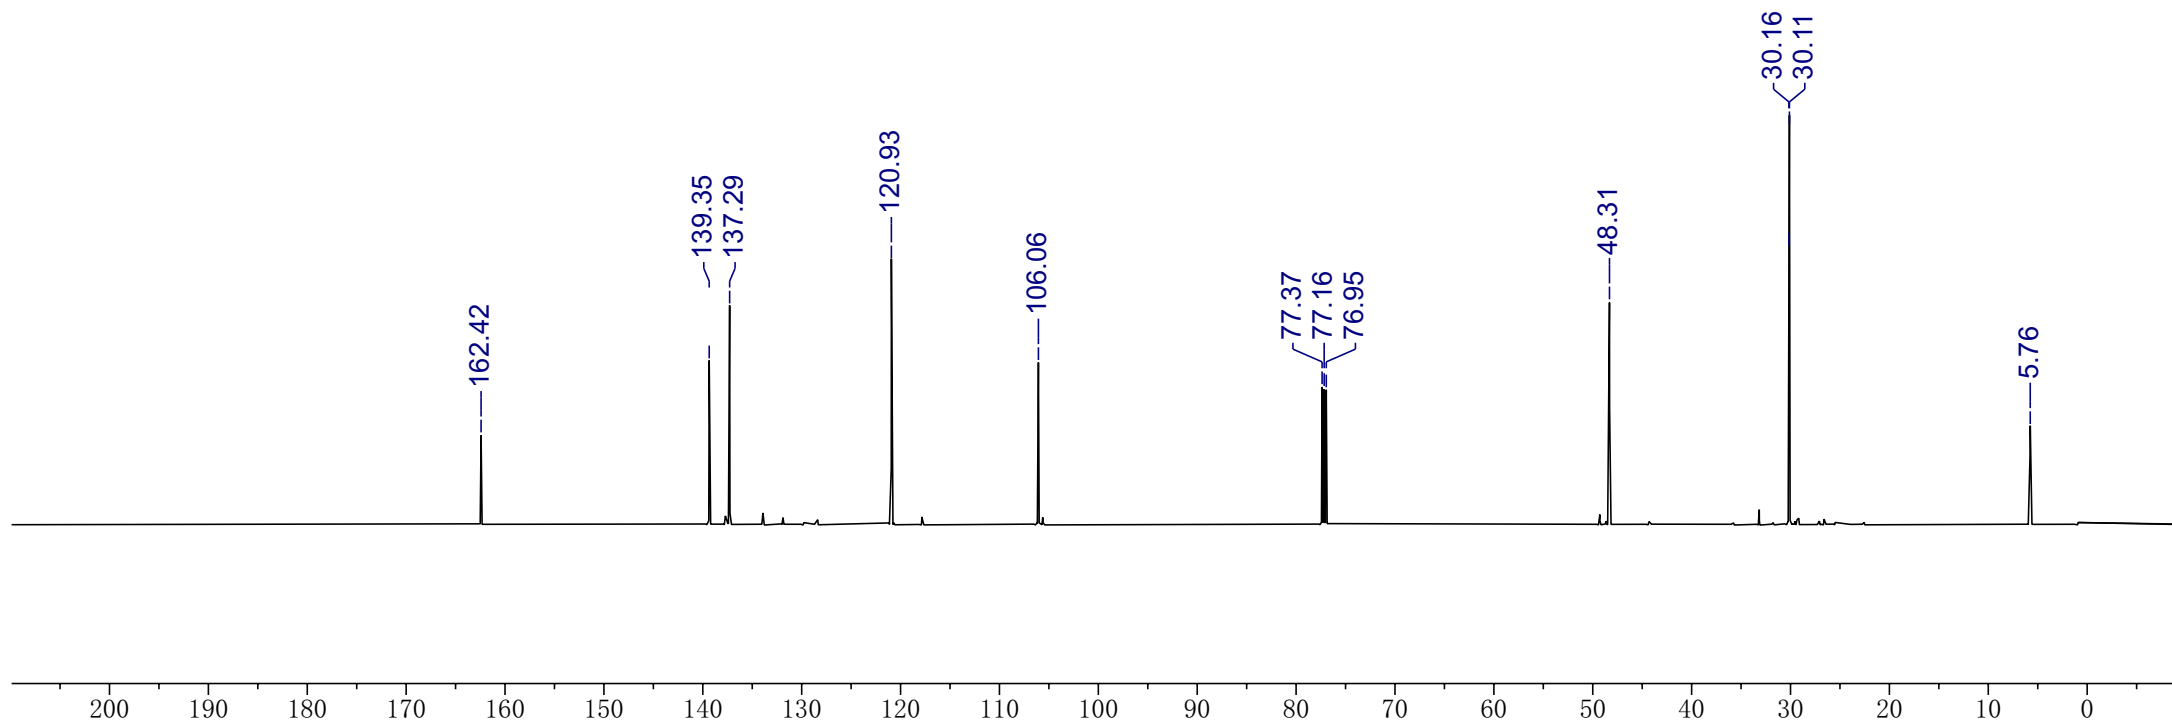

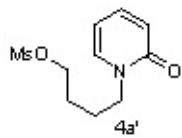

400 MHz, CDCl<sub>3</sub>

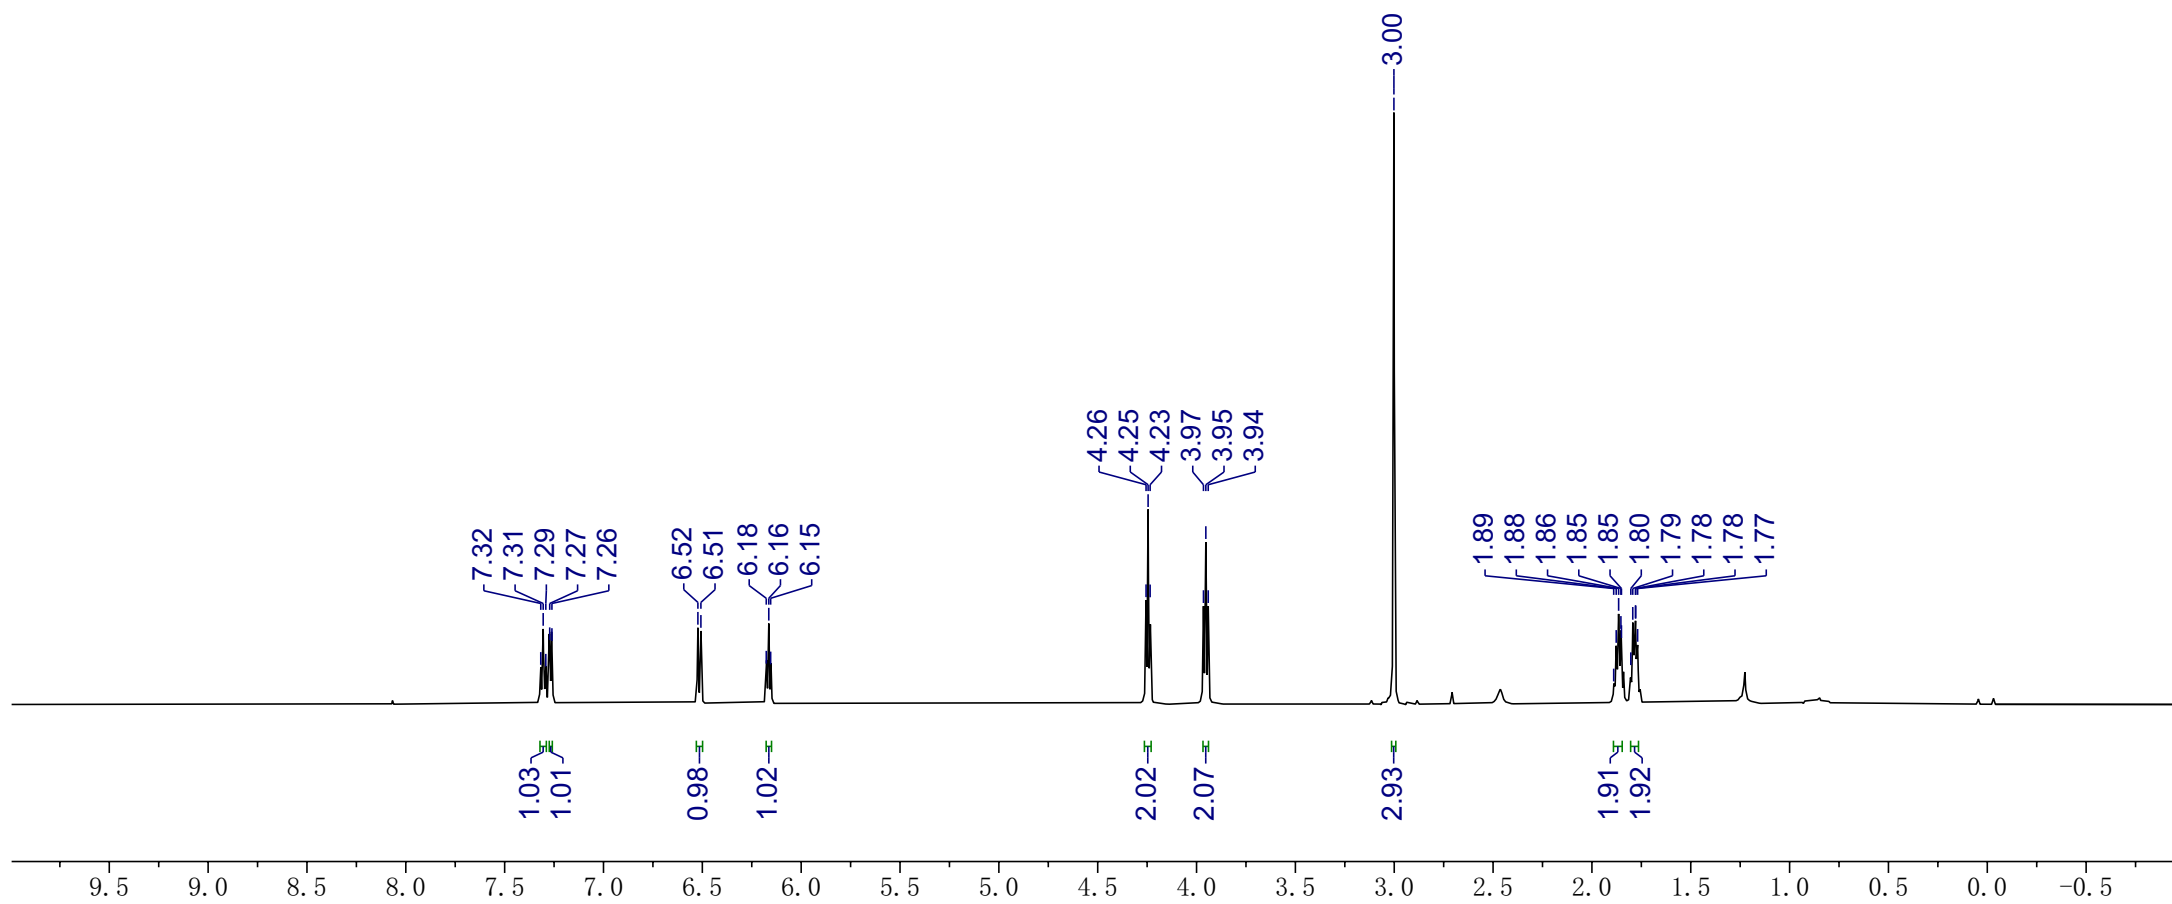



400 MHz, CDCl<sub>3</sub>

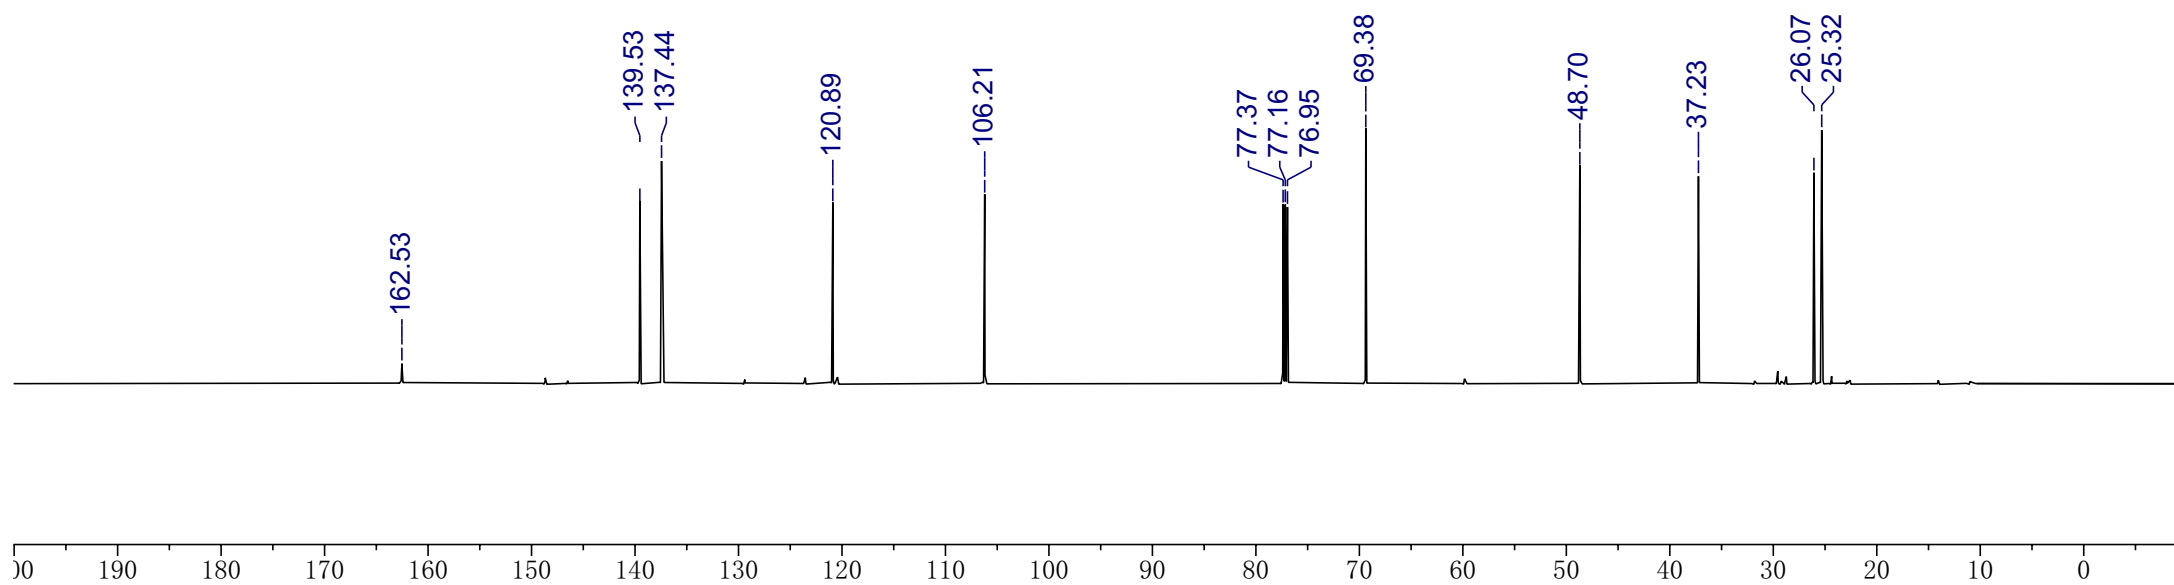

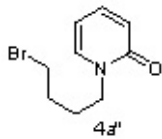

400 MHz, CDCl<sub>3</sub>

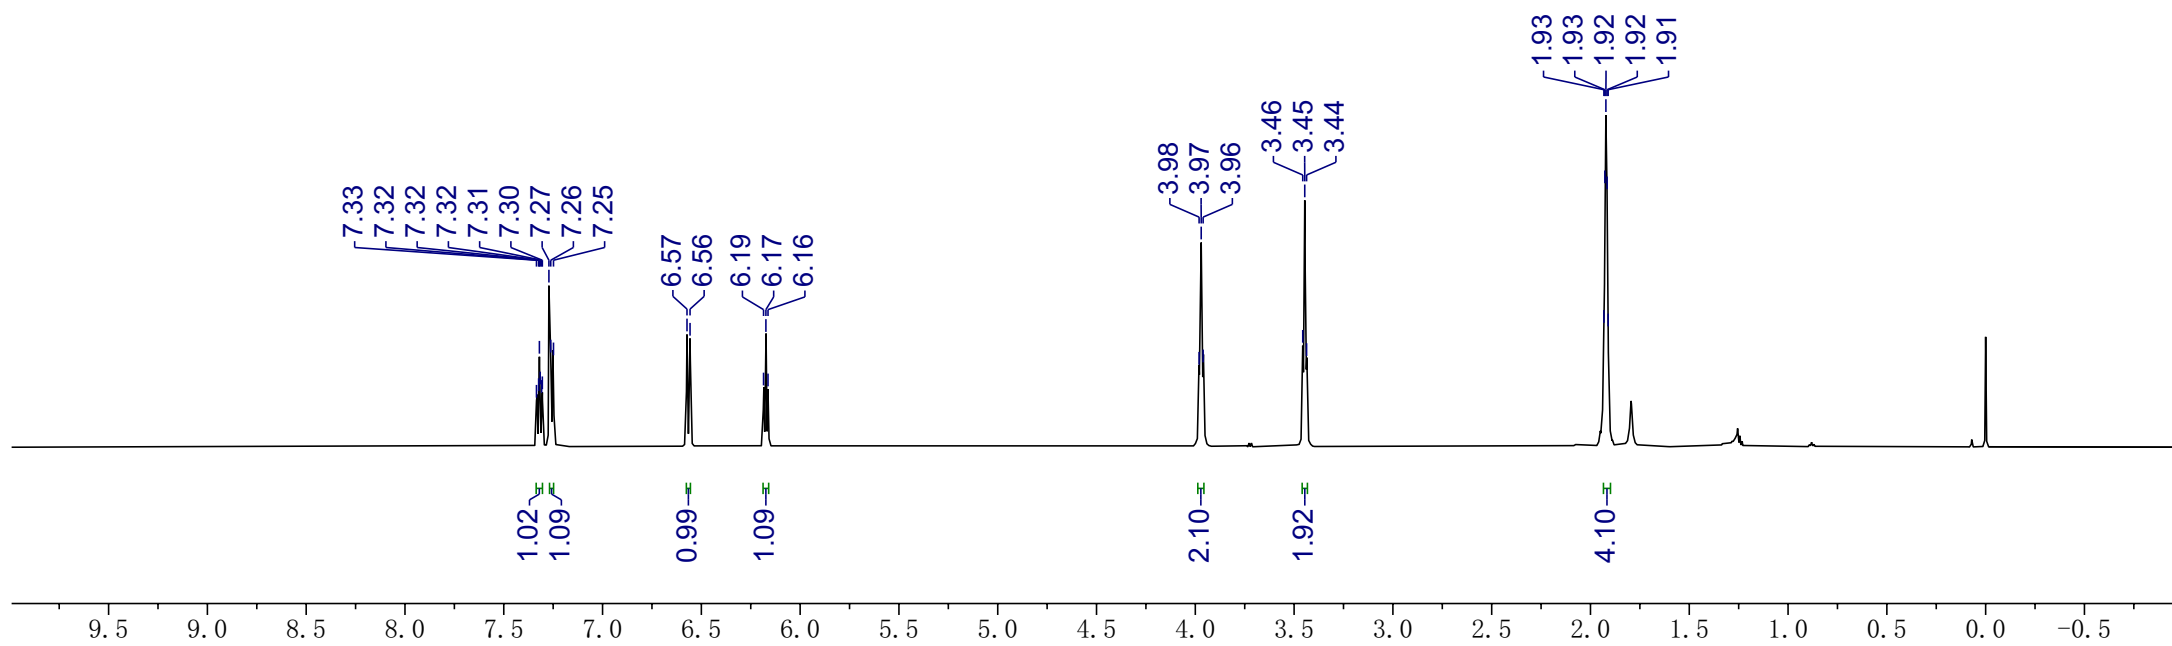





400 MHz, CDCl<sub>3</sub>

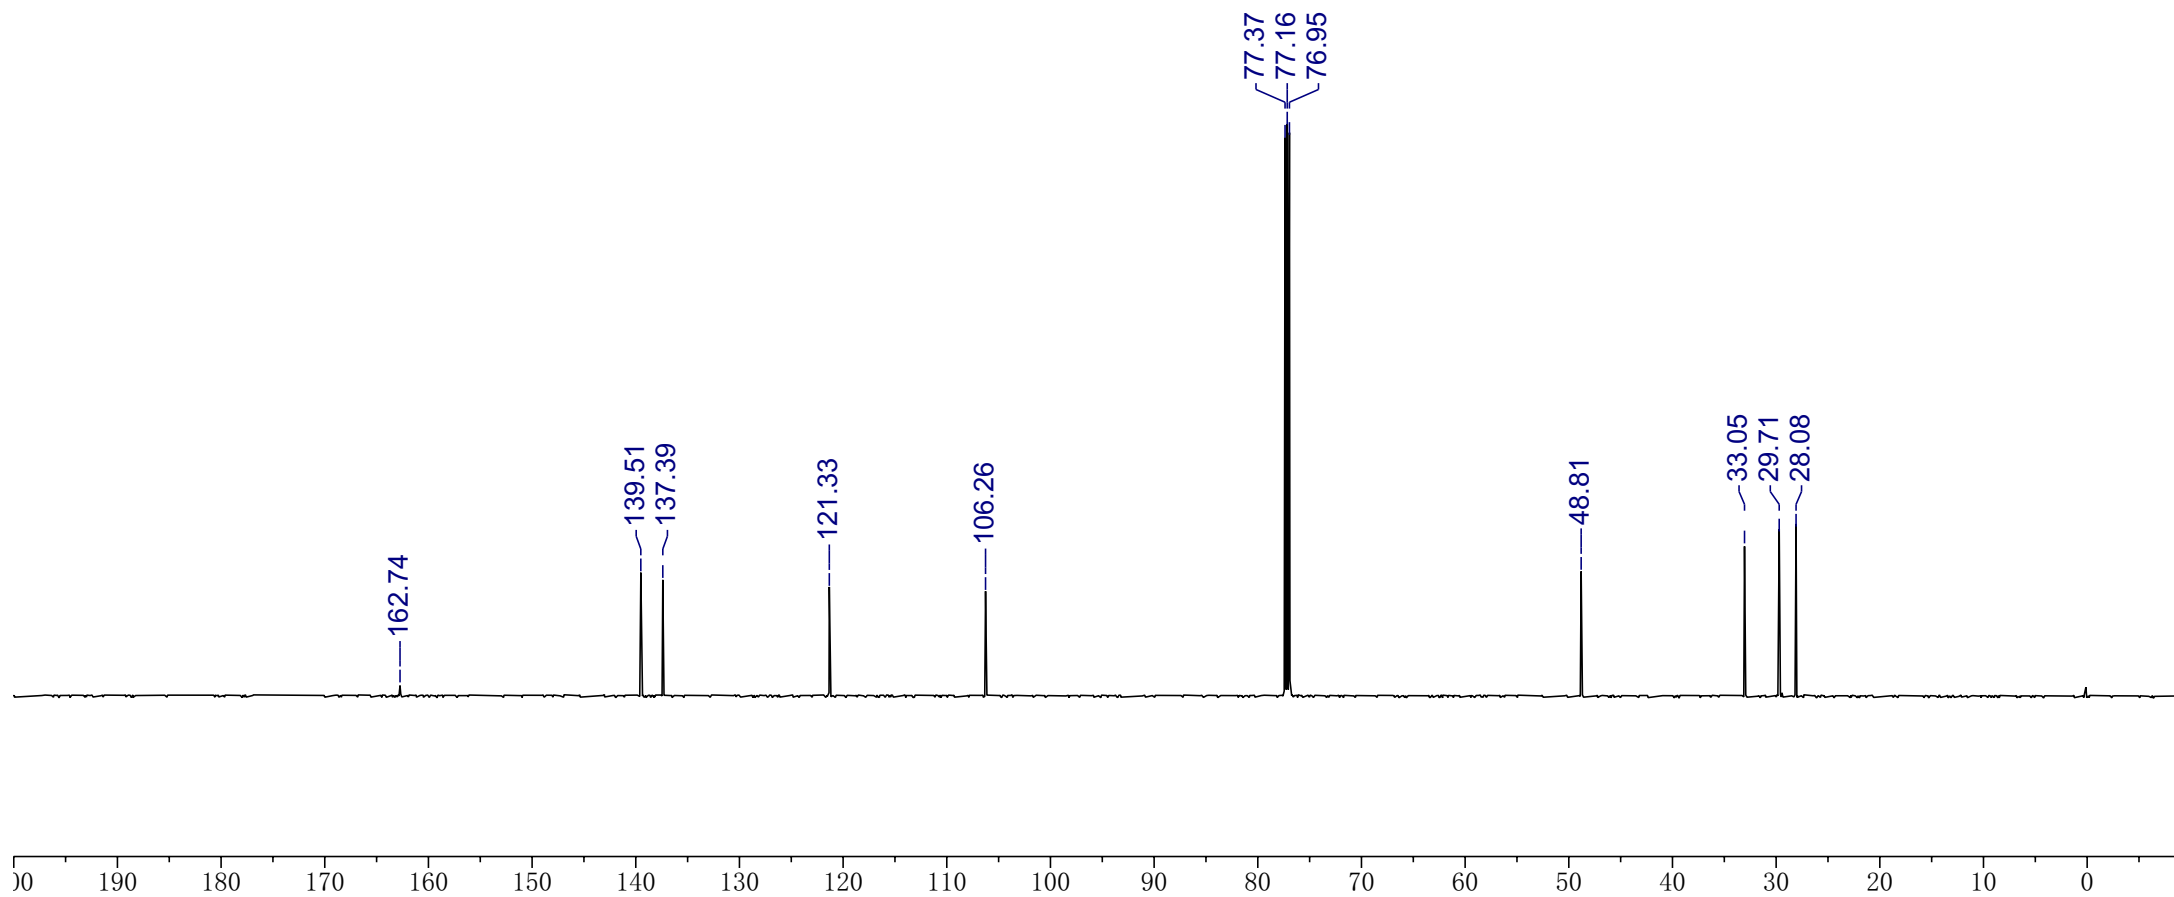

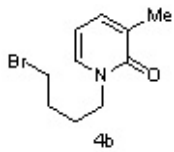

400 MHz, CDCl<sub>3</sub>

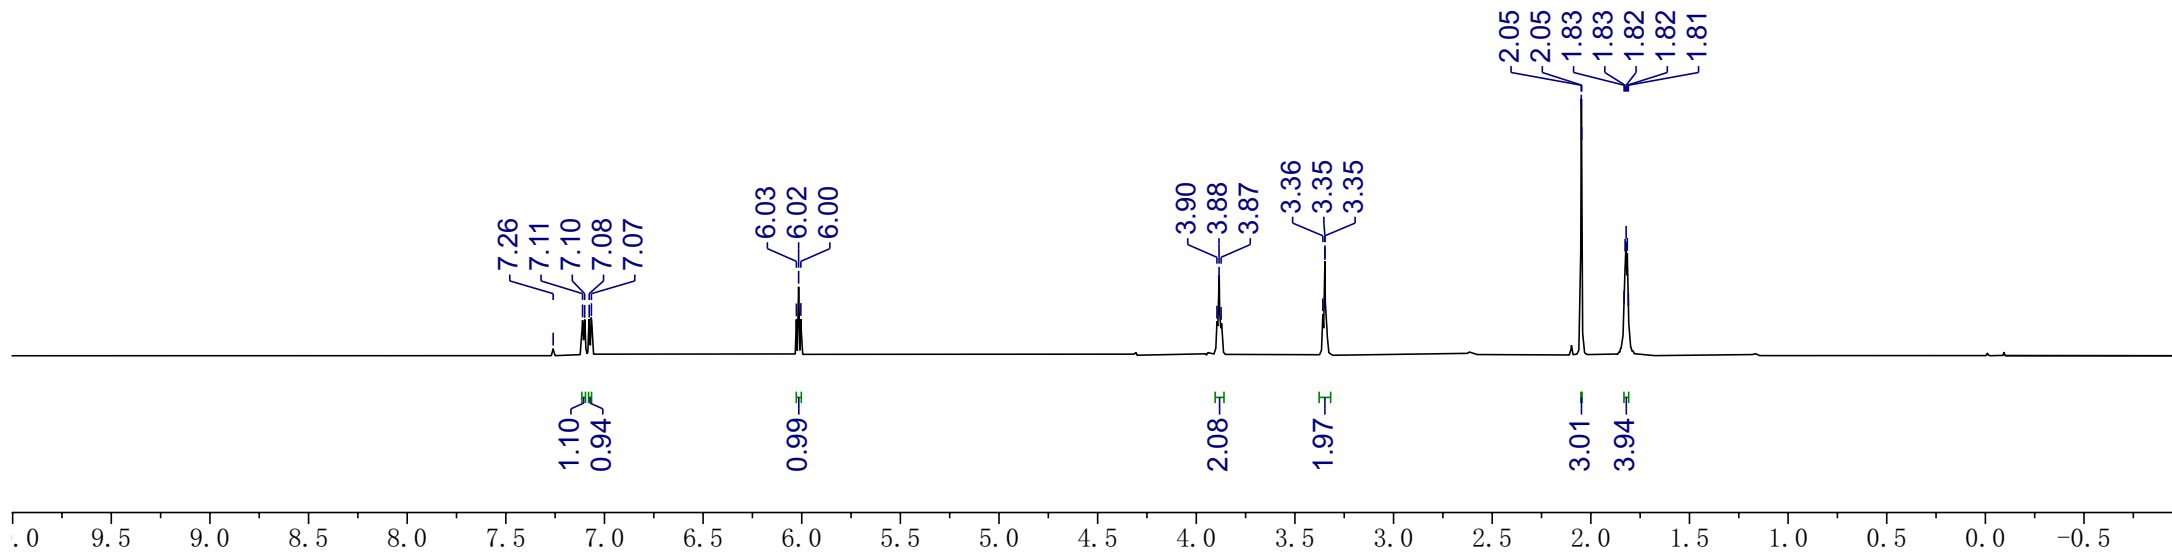

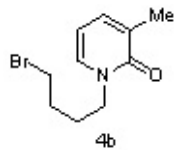

400 MHz, CDCl<sub>3</sub>

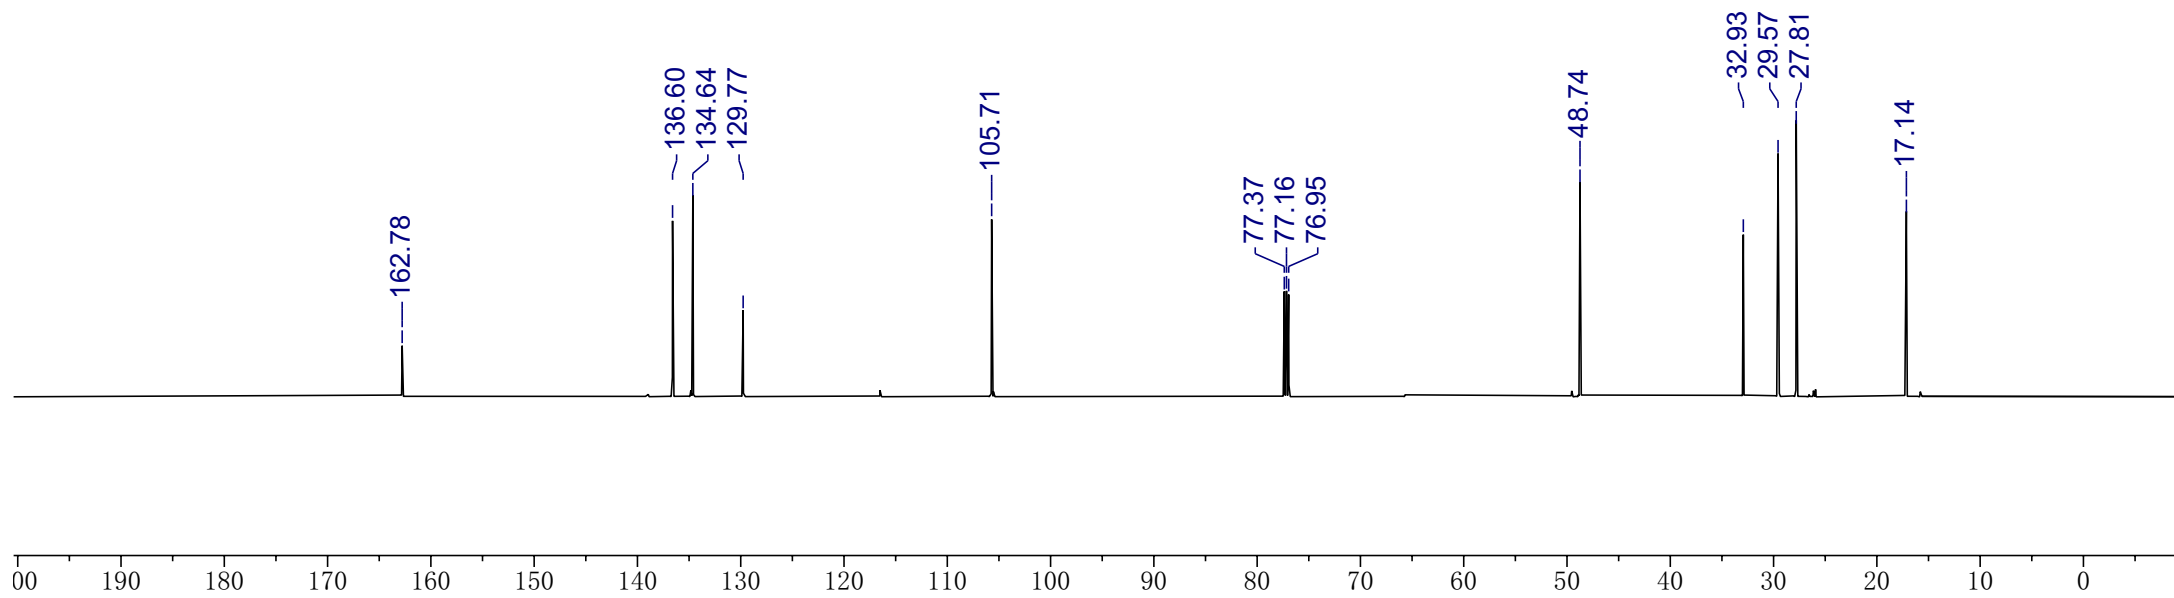

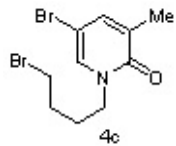

400 MHz, CDCl<sub>3</sub>

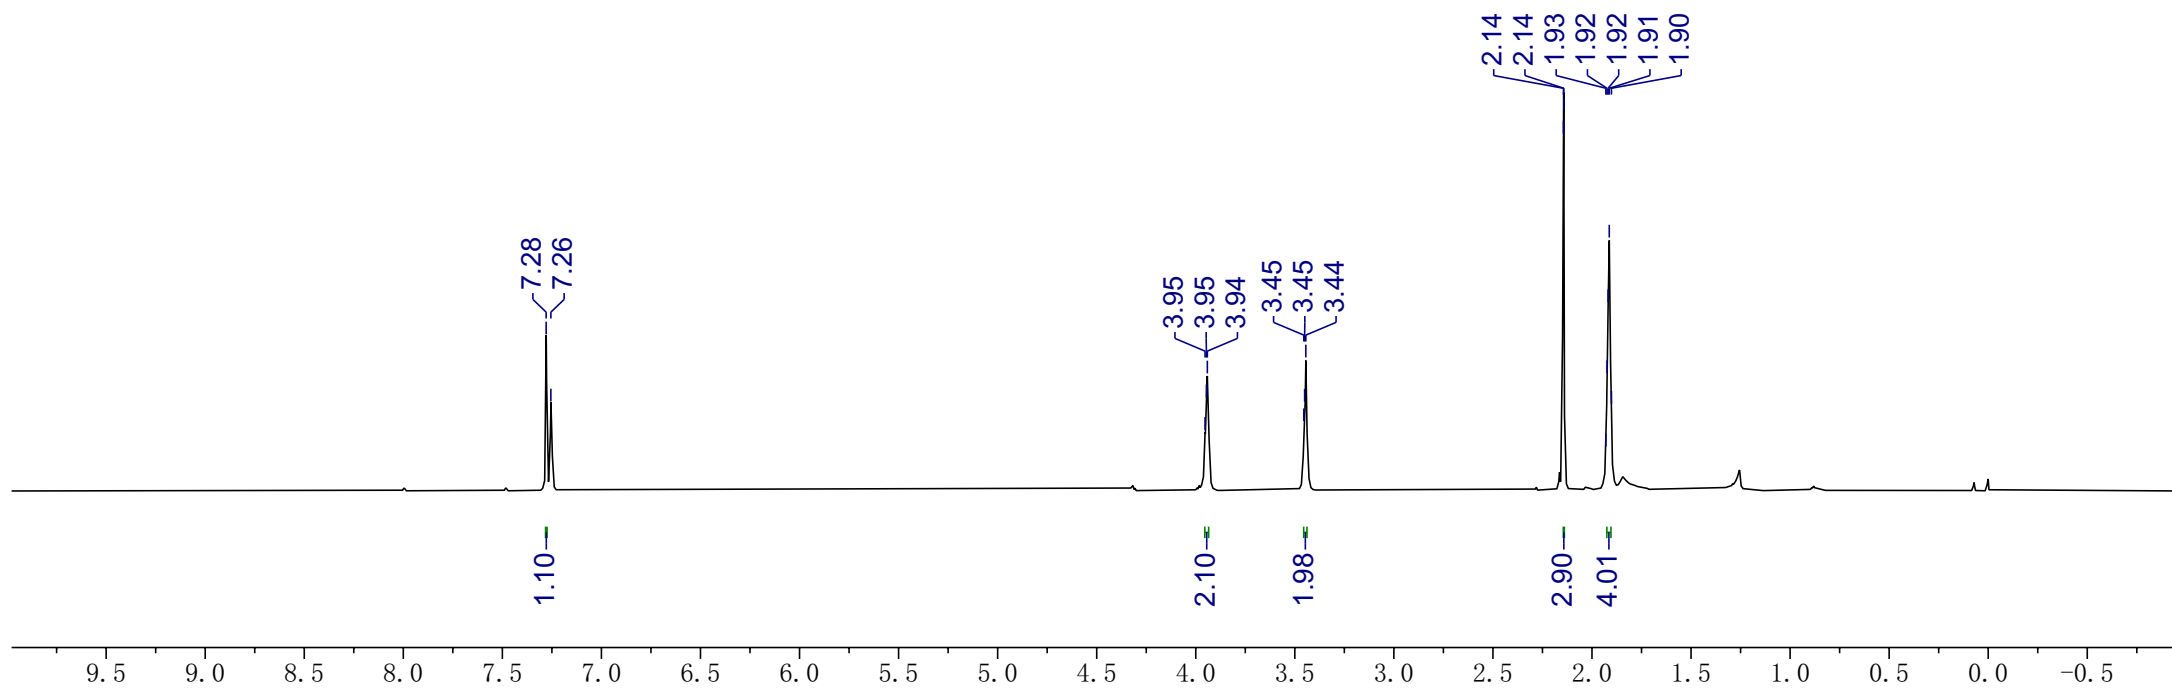

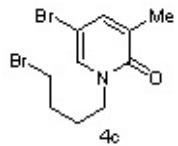

400 MHz, CDCl<sub>3</sub>

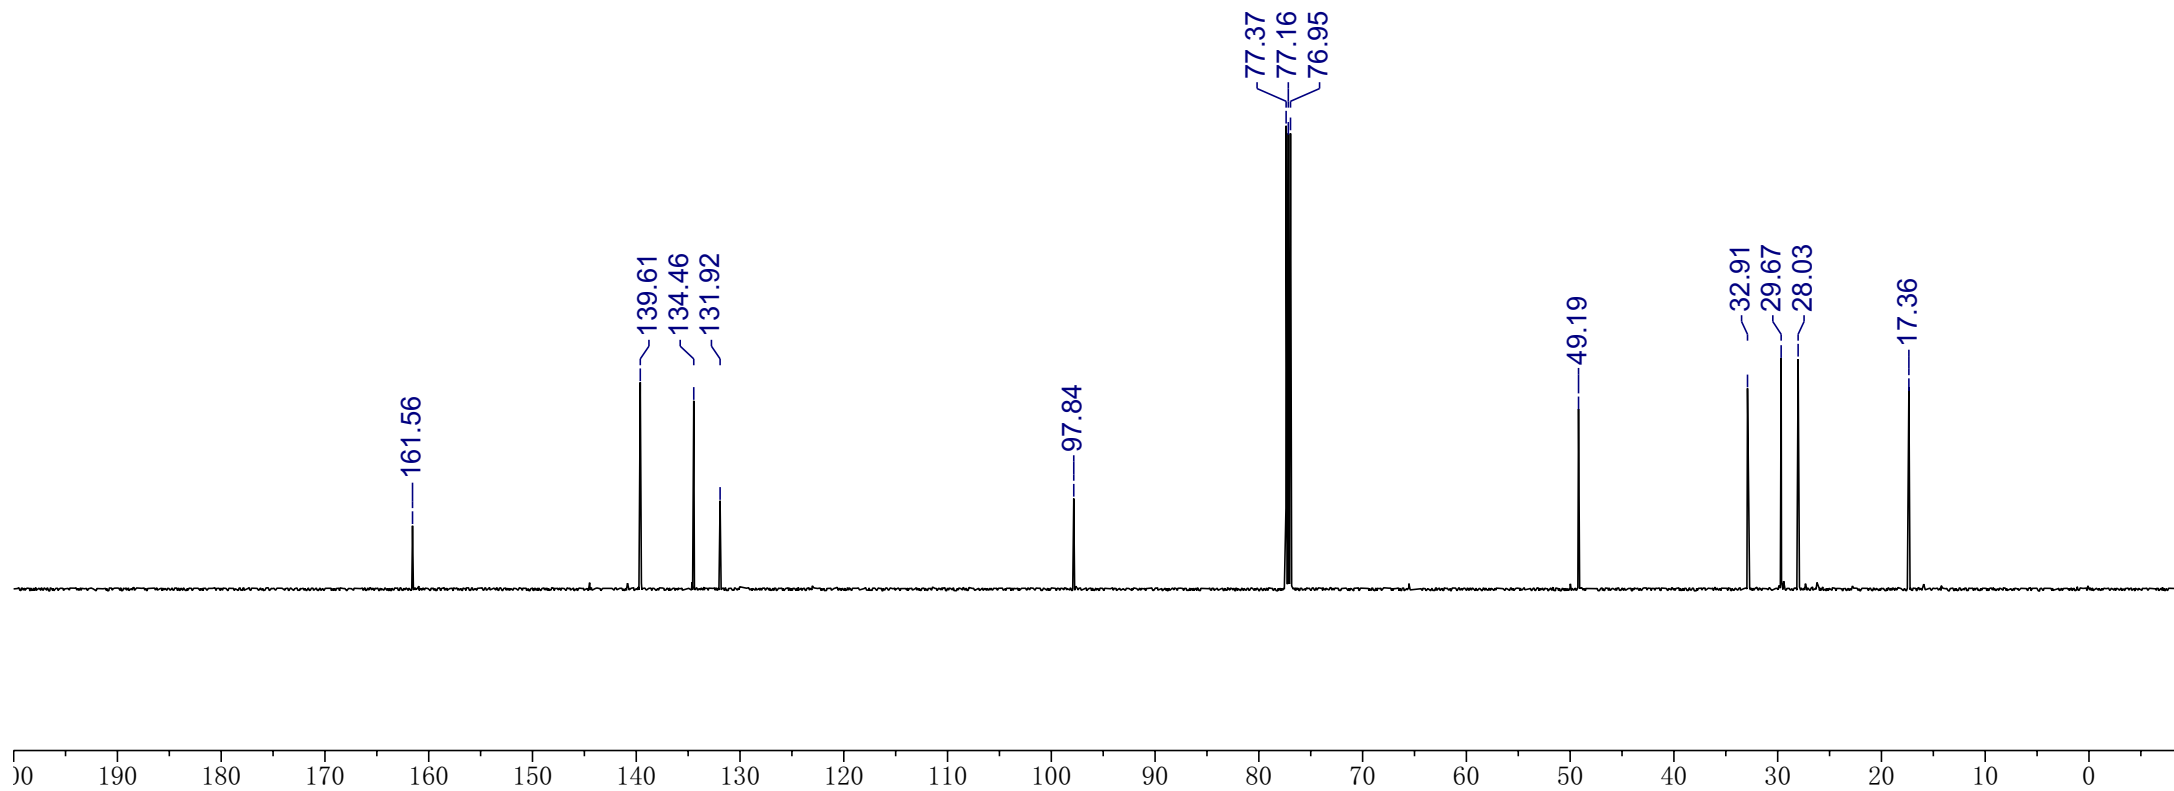

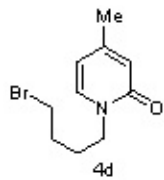

400 MHz, CDCl<sub>3</sub>

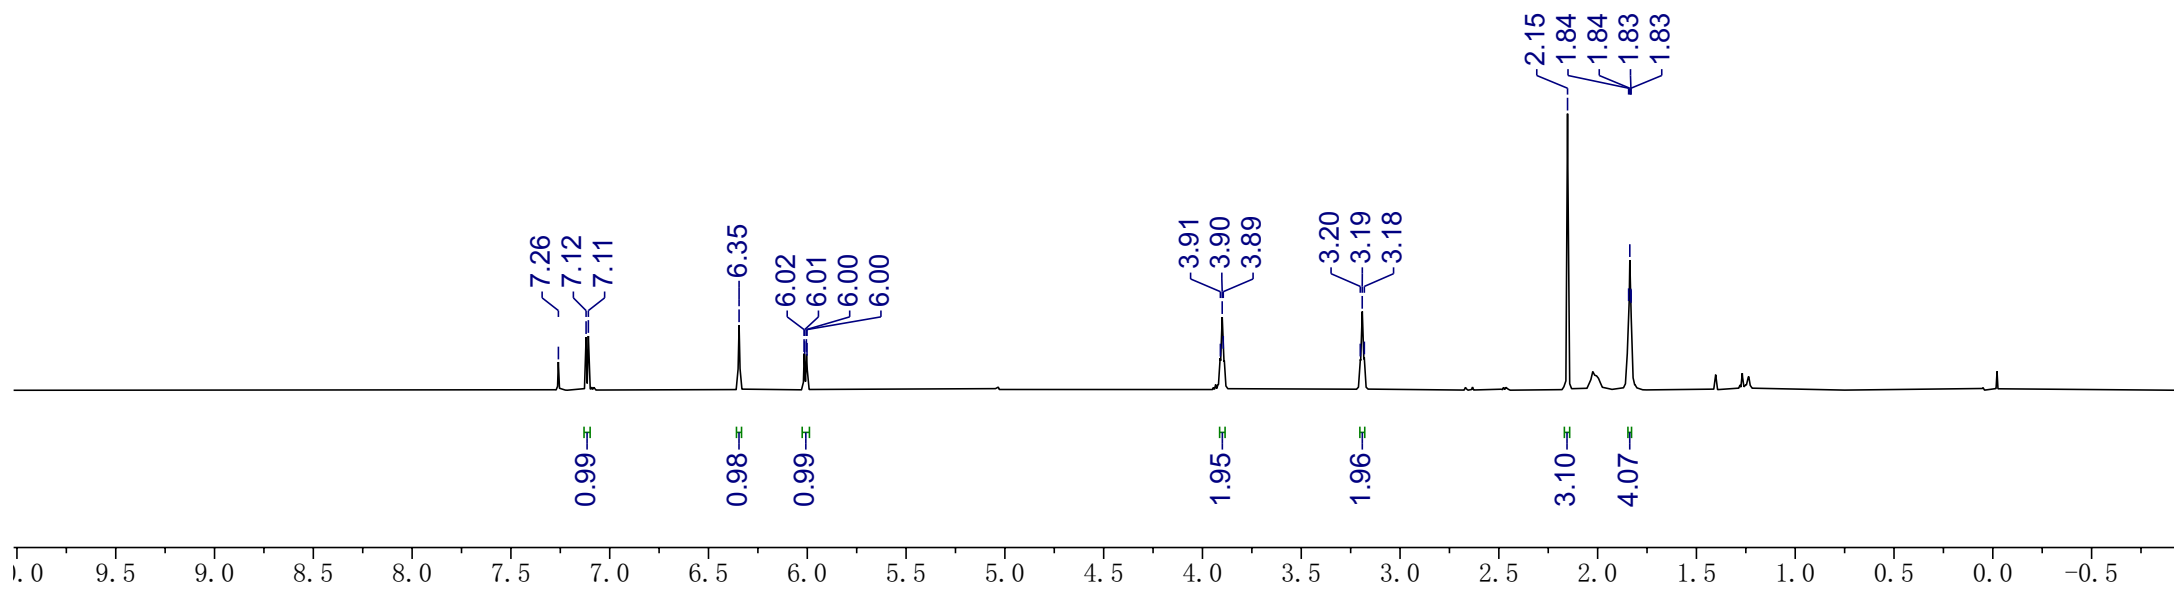



400 MHz, CDCl<sub>3</sub>

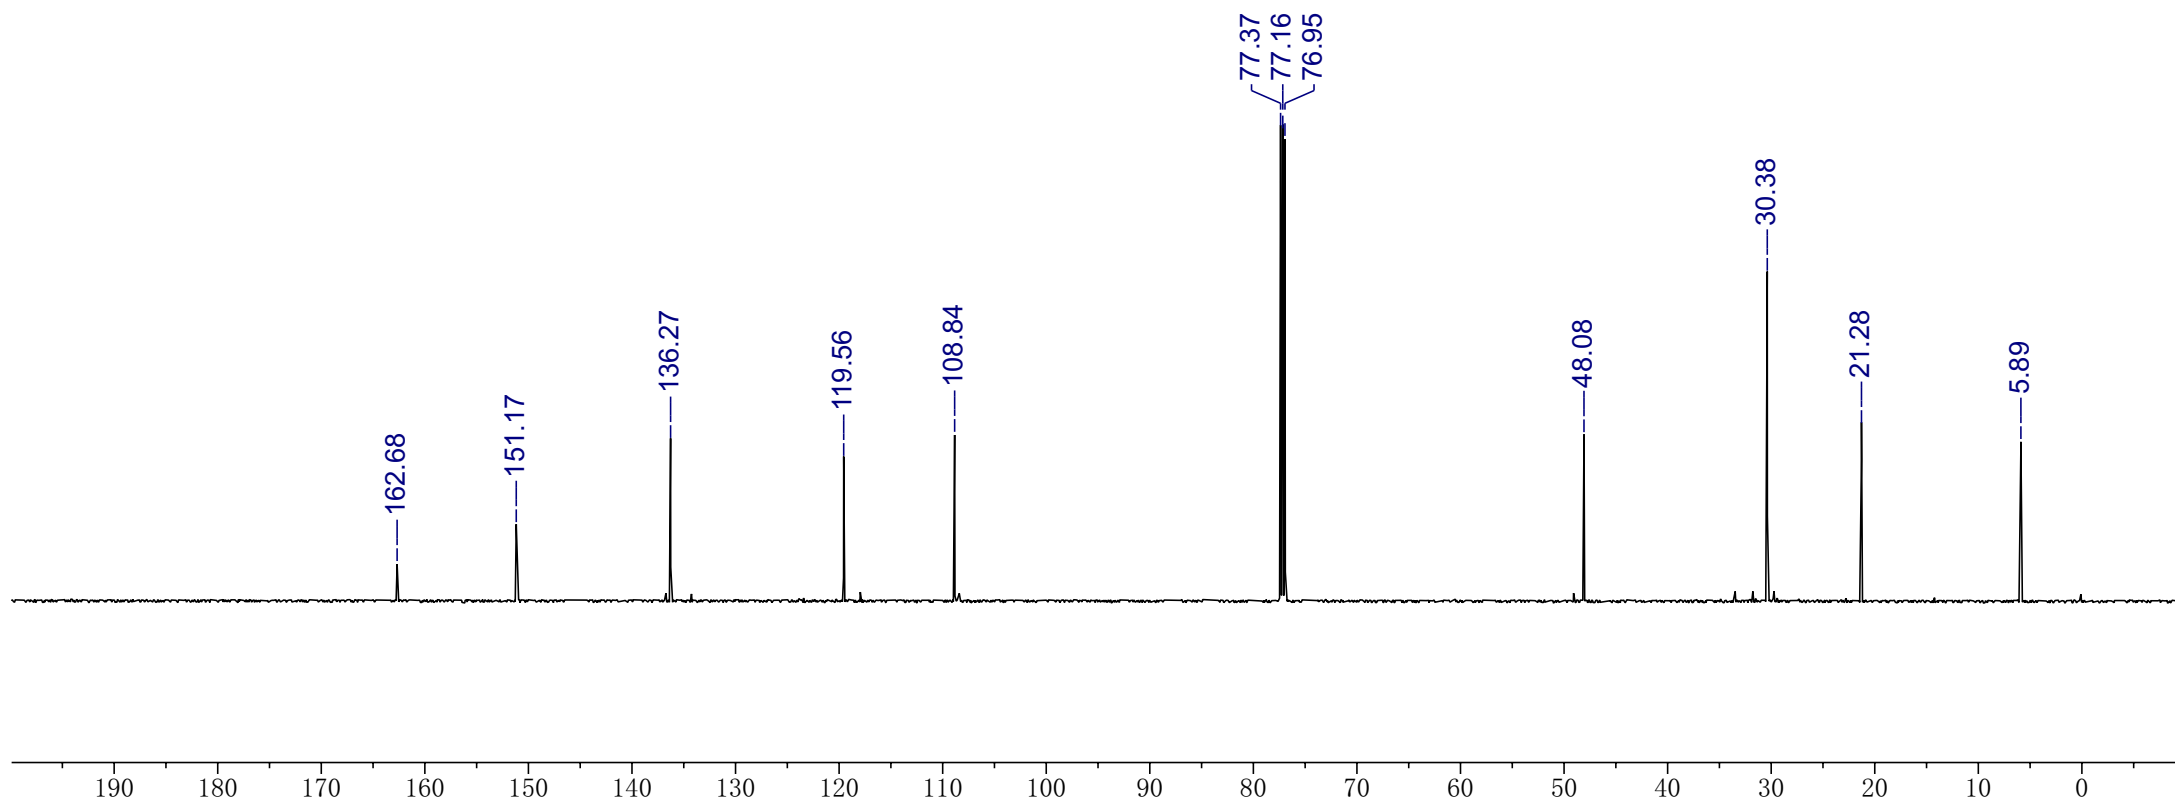

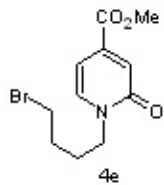

400 MHz, CDCl<sub>3</sub>

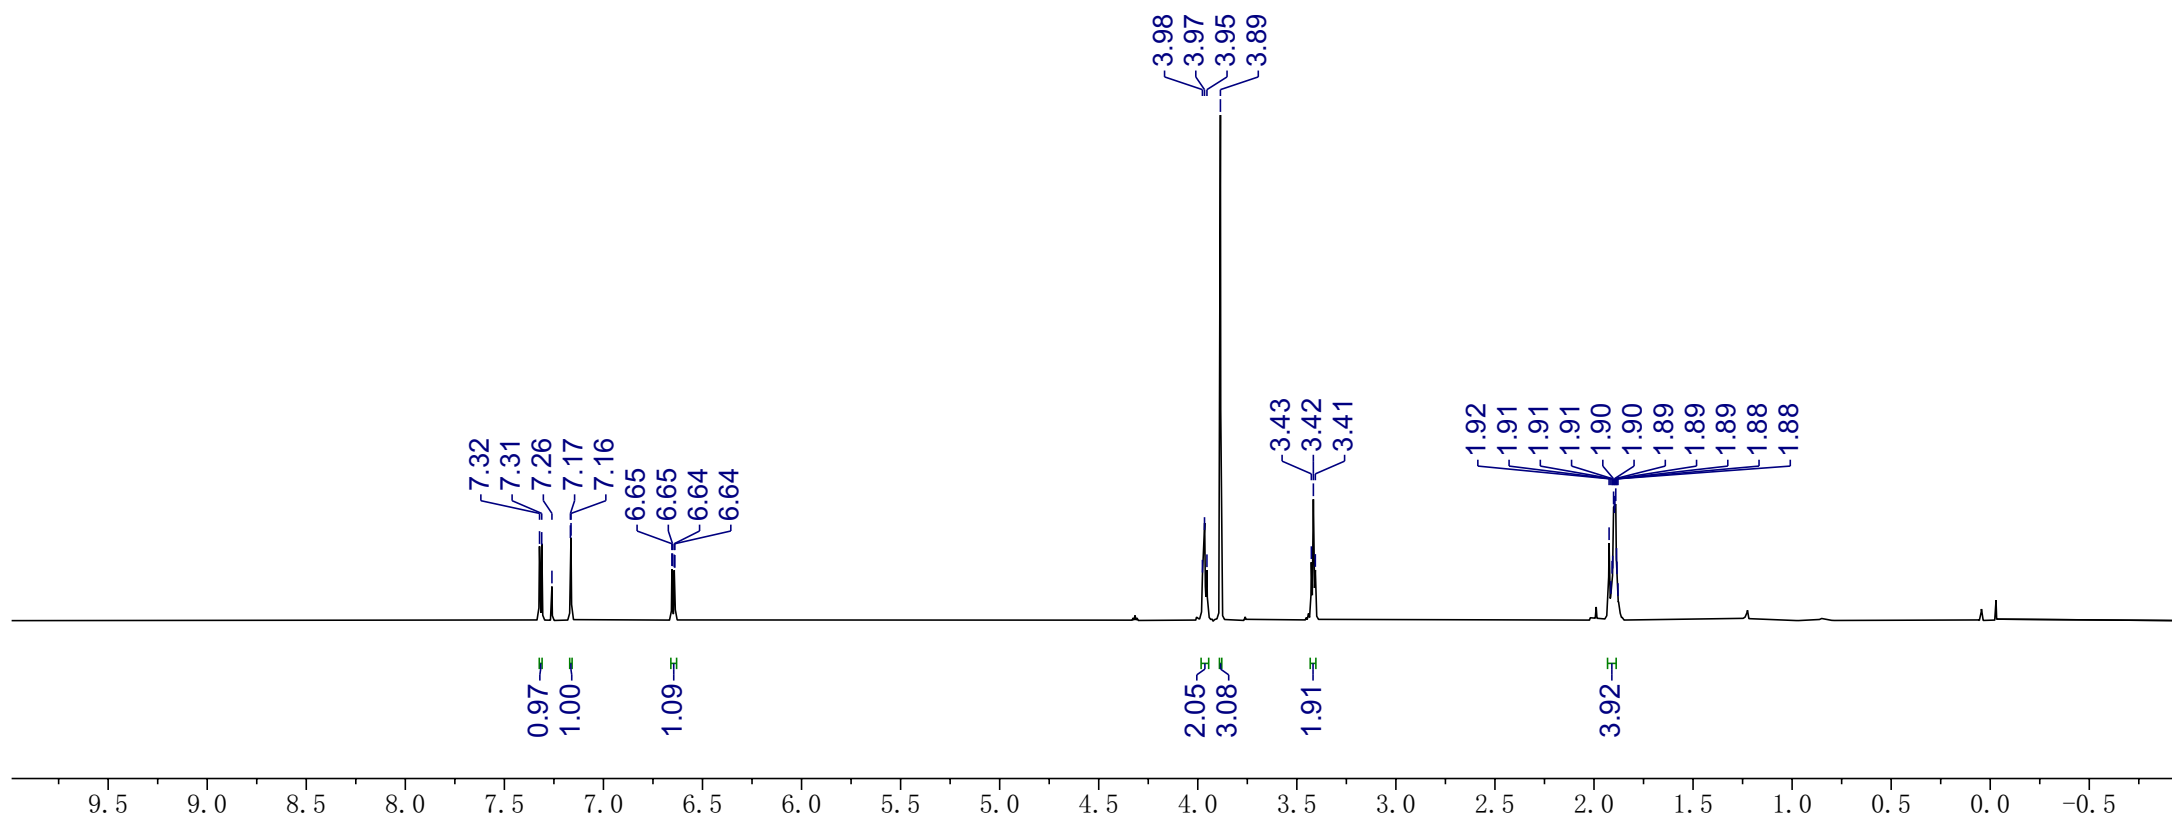





400 MHz, CDCl<sub>3</sub>

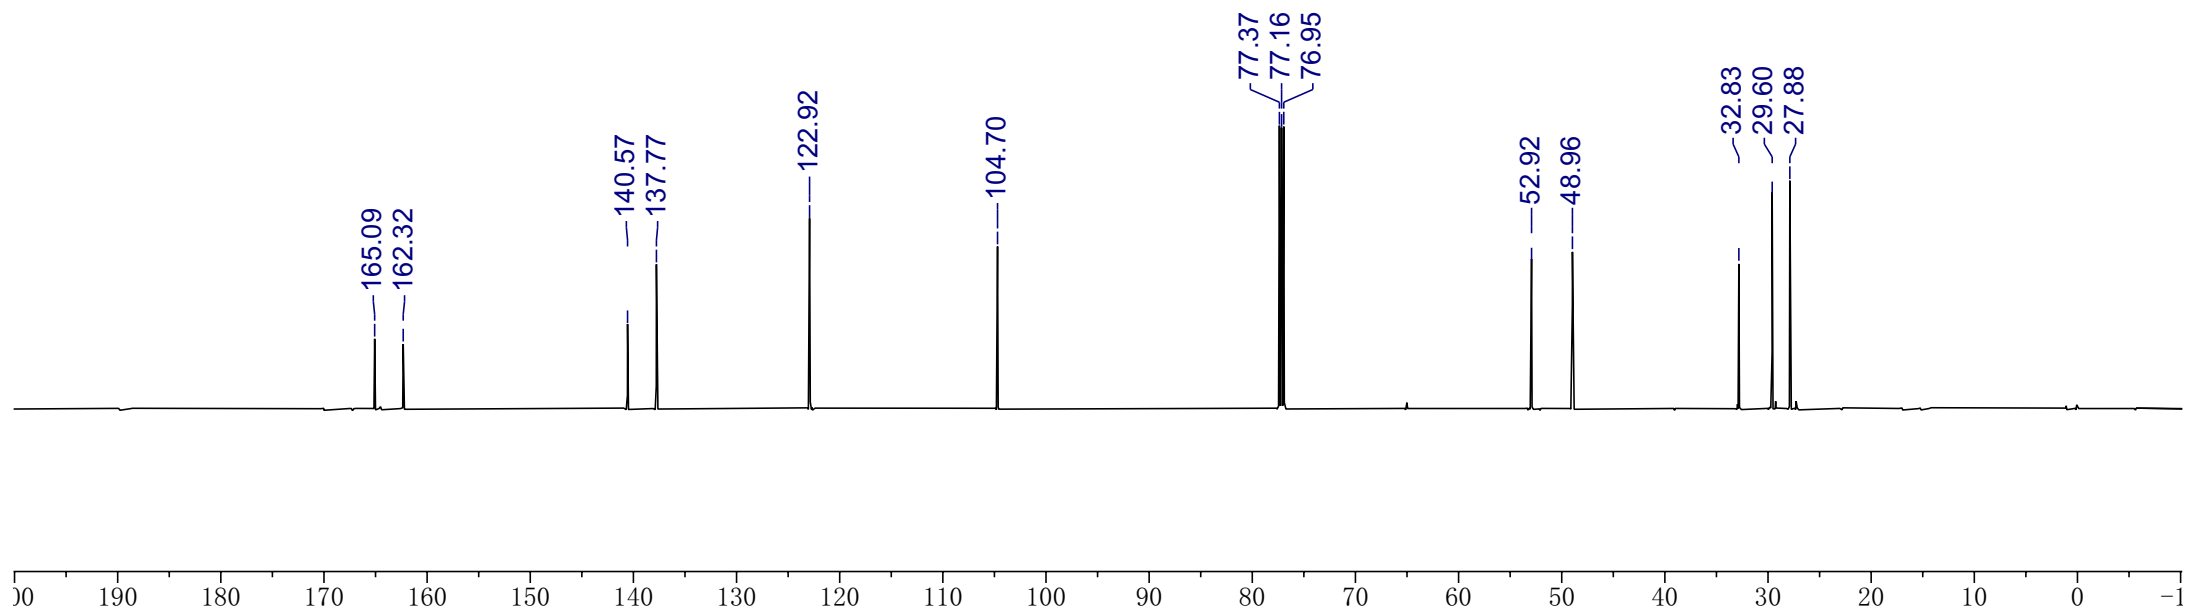

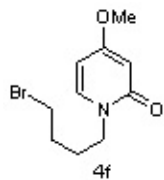

400 MHz, CDCl<sub>3</sub>

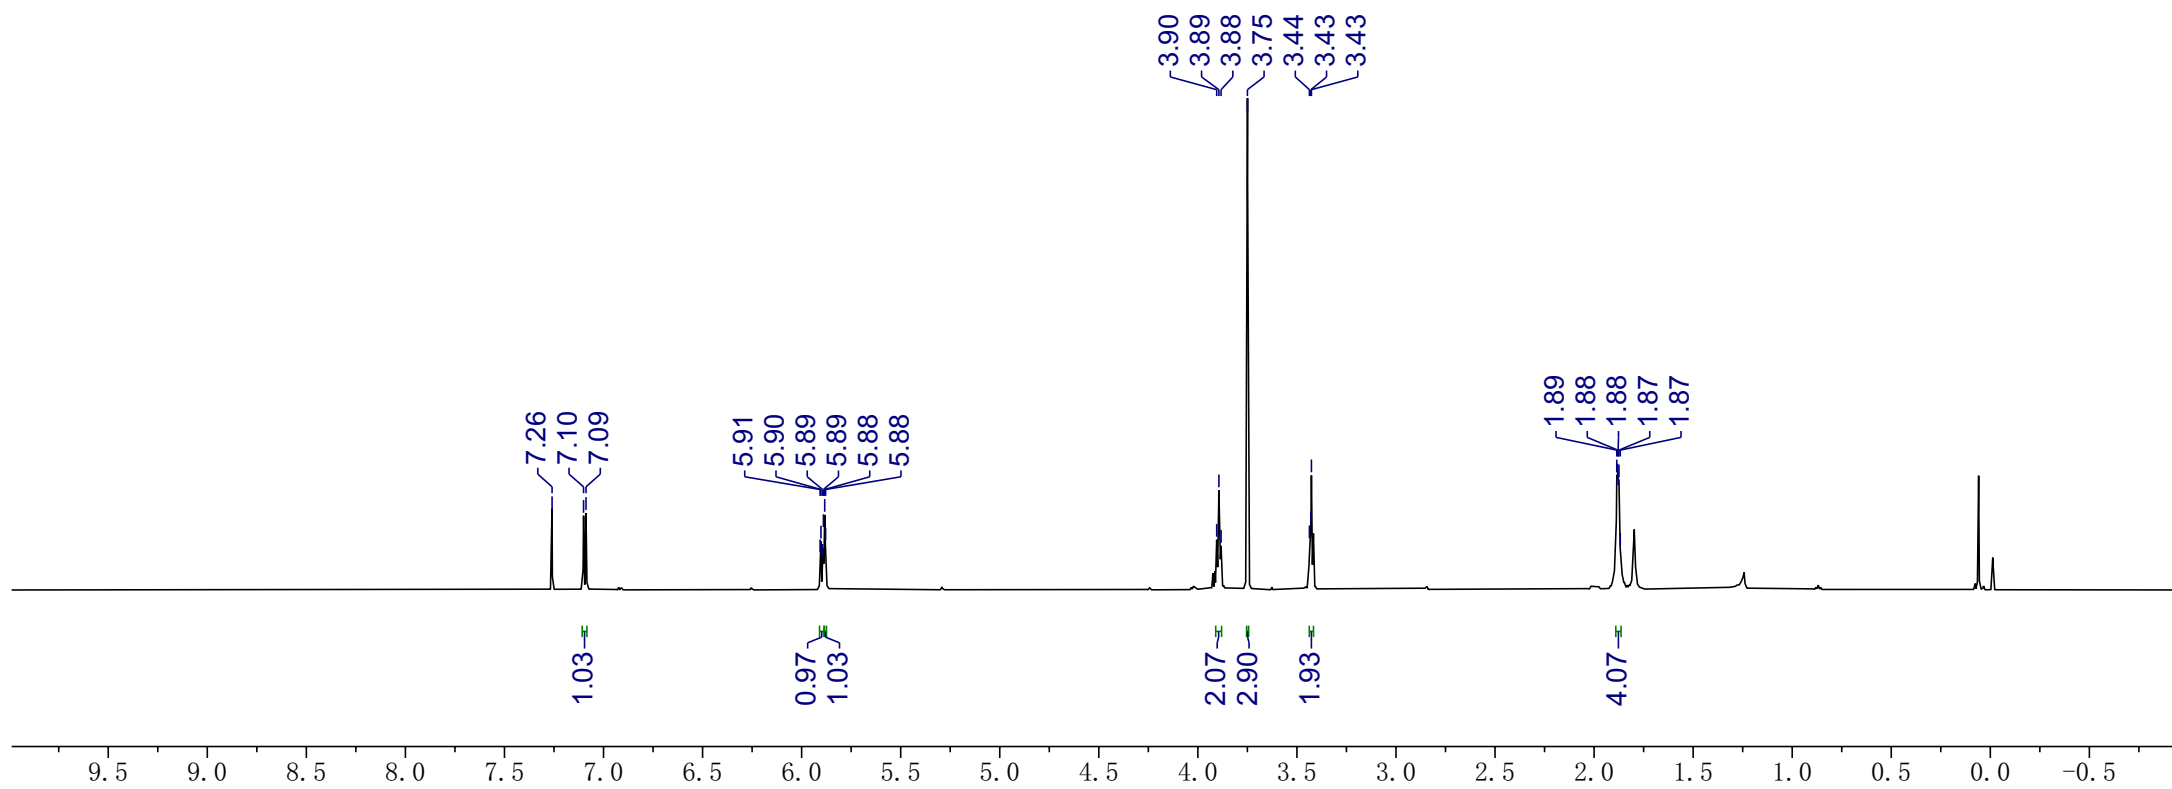

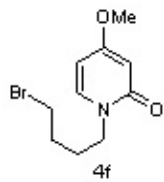

400 MHz, CDCl<sub>3</sub>

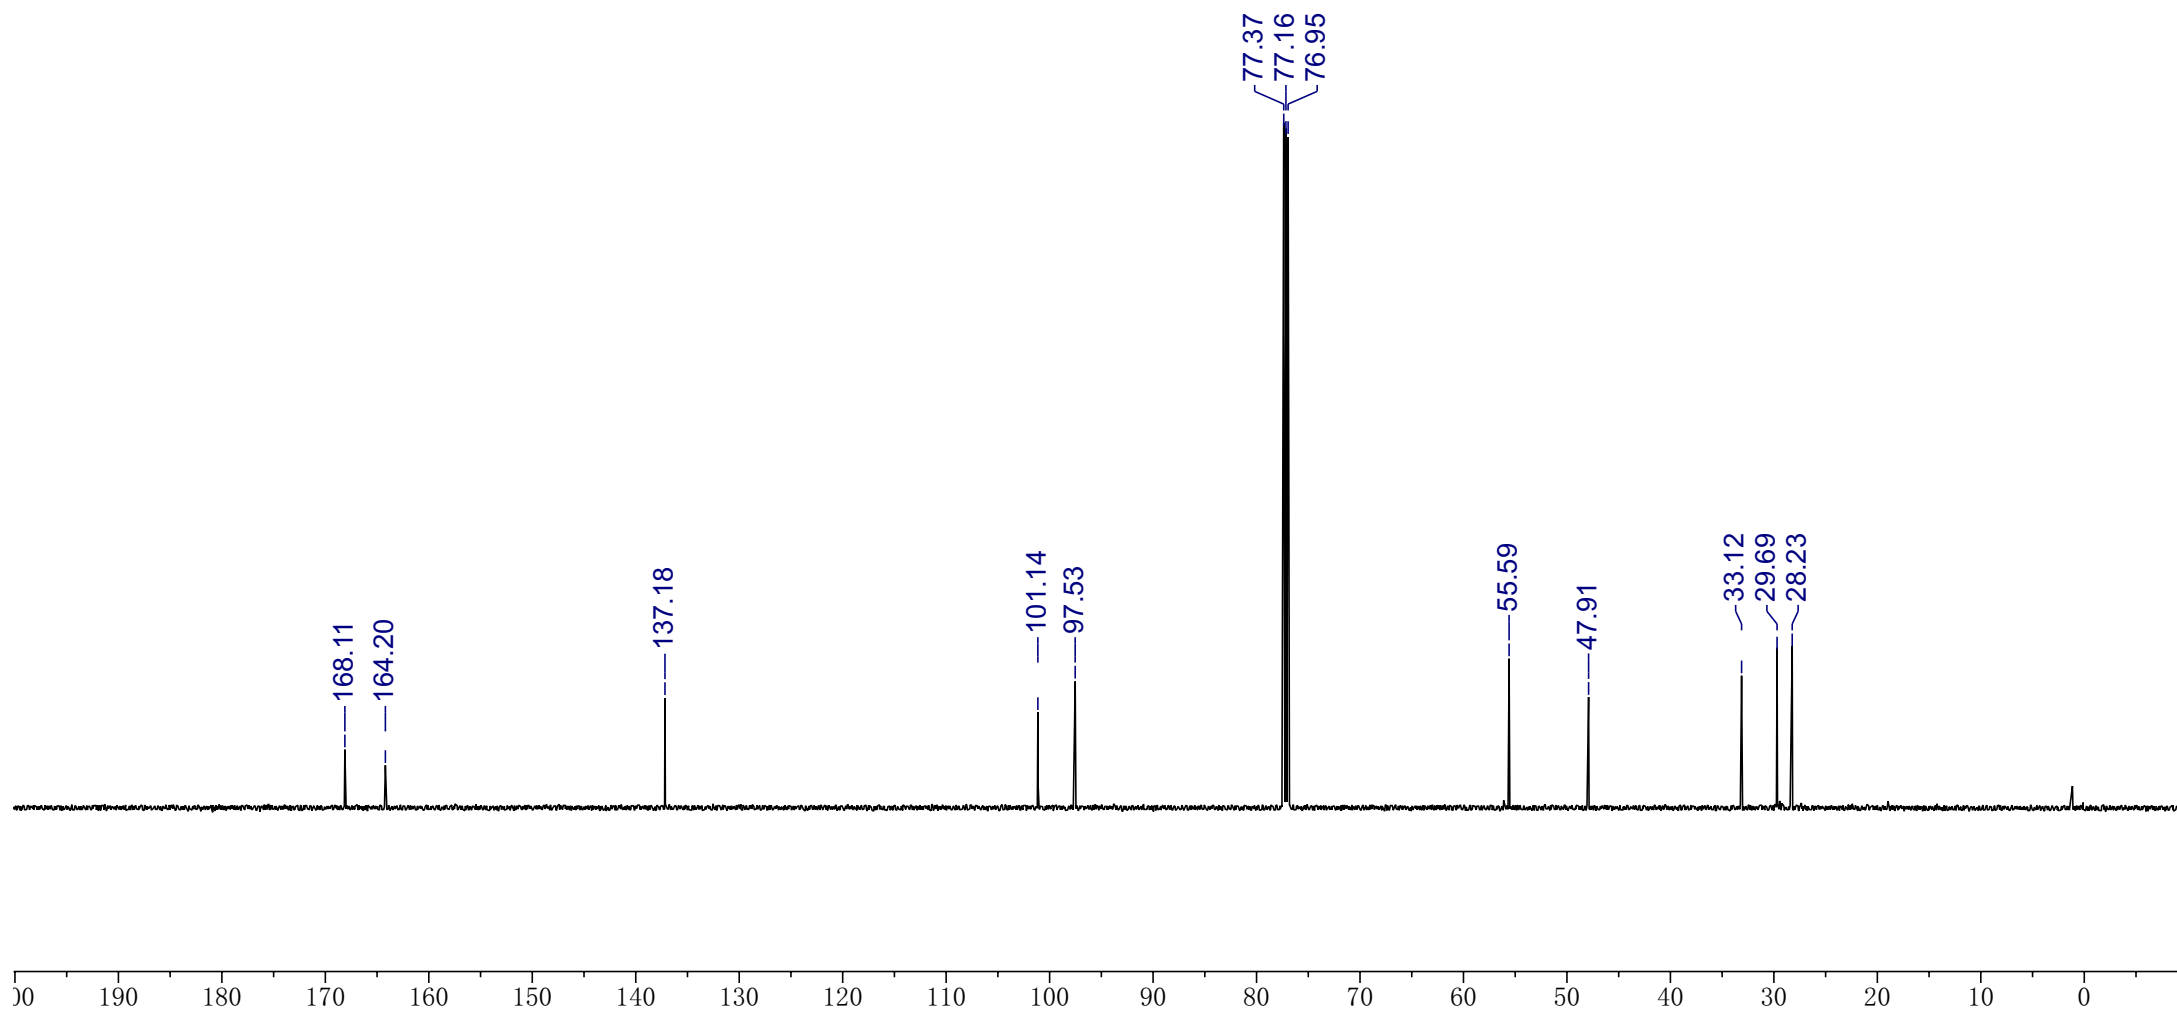

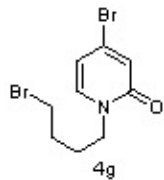

400 MHz, CDCl<sub>3</sub>

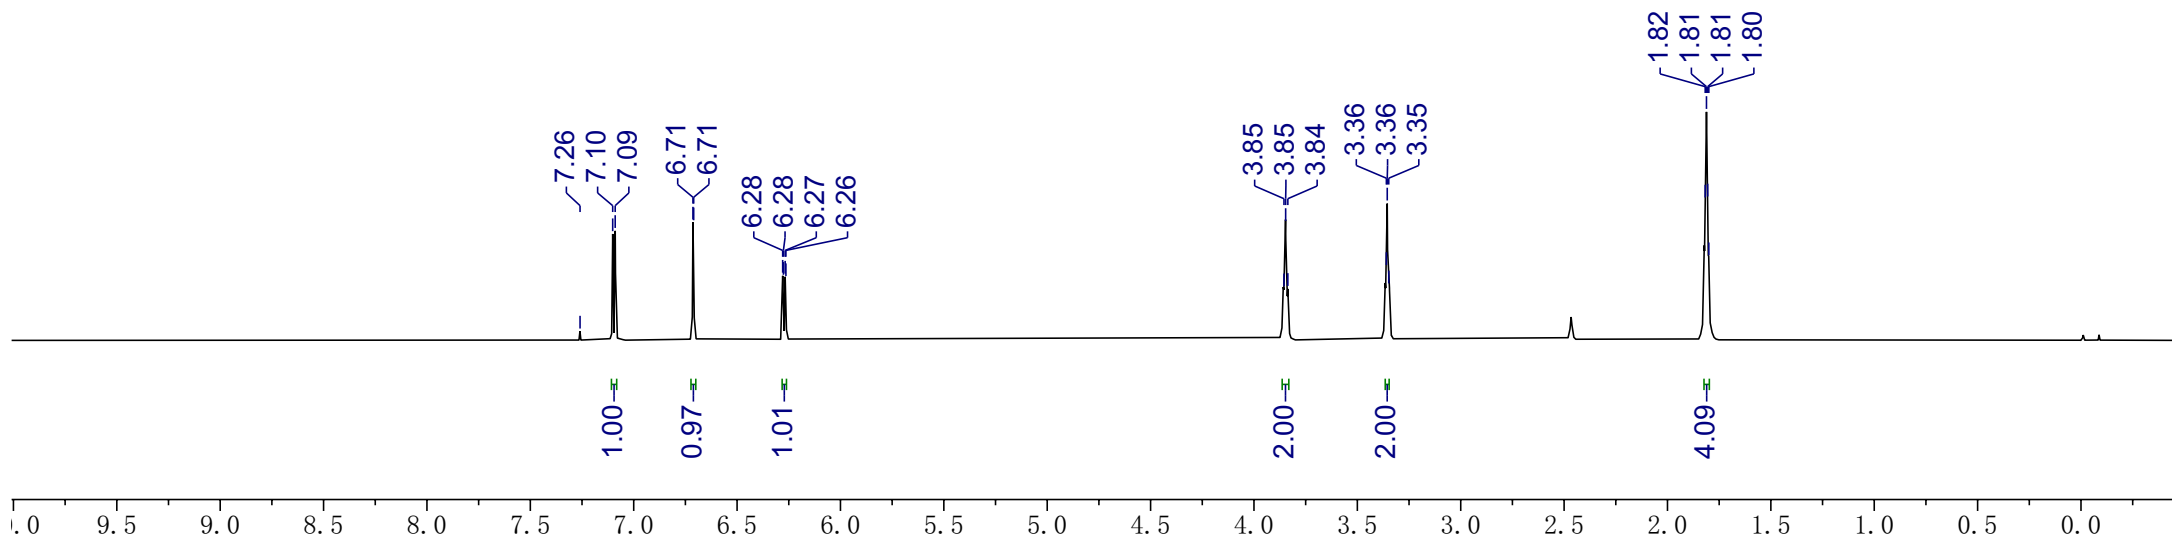

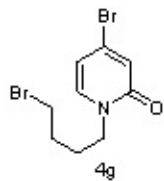

400 MHz, CDCl<sub>3</sub>

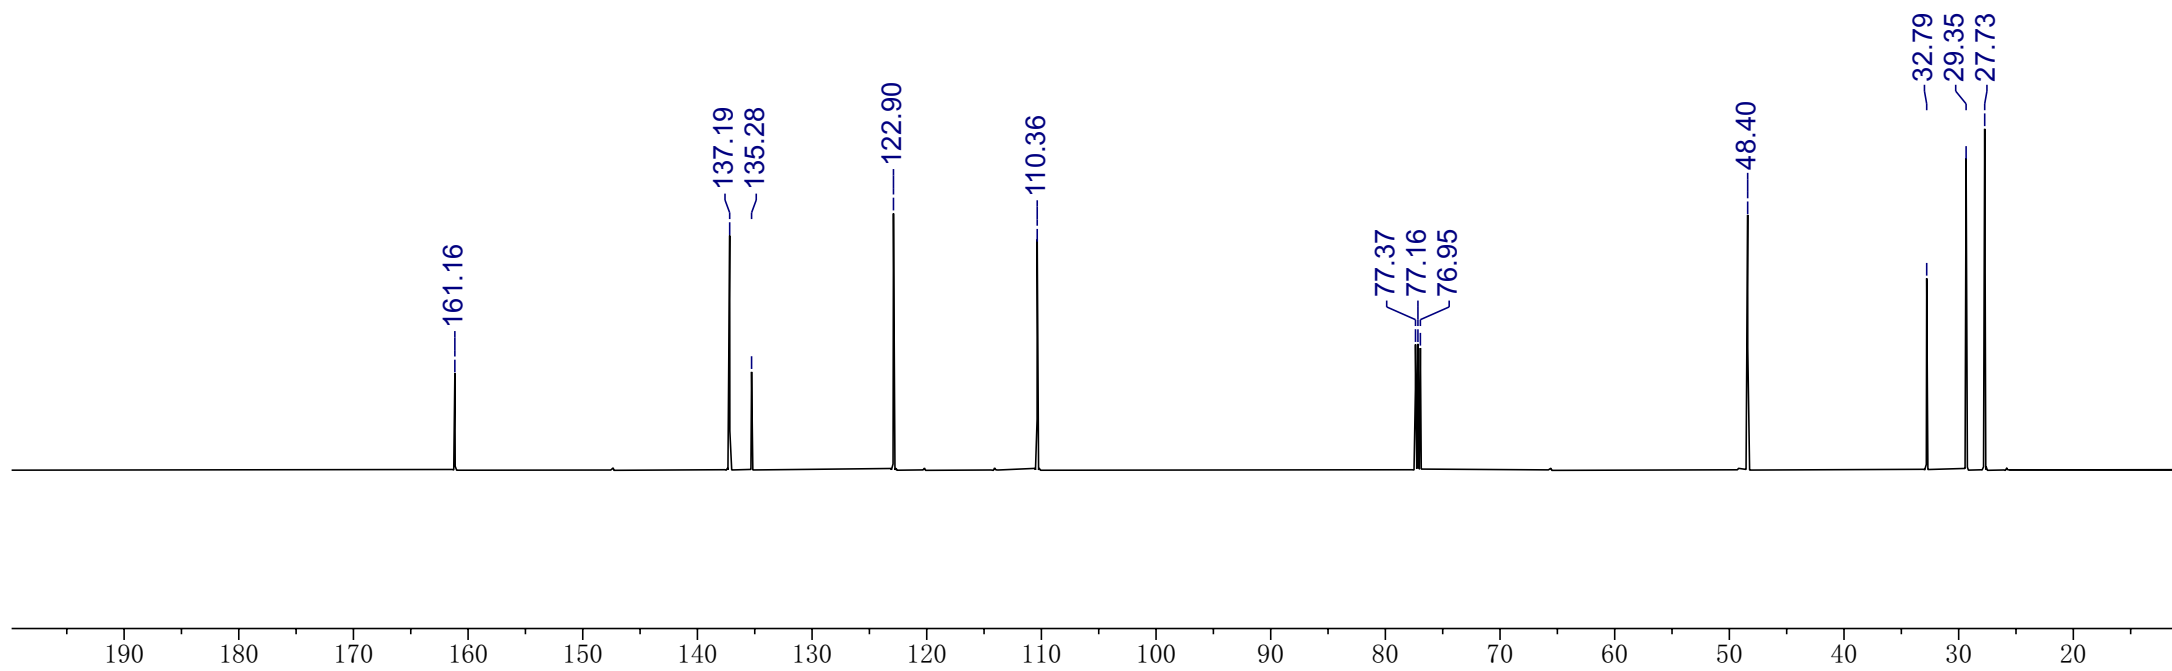

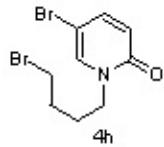

400 MHz, CDCl<sub>3</sub>

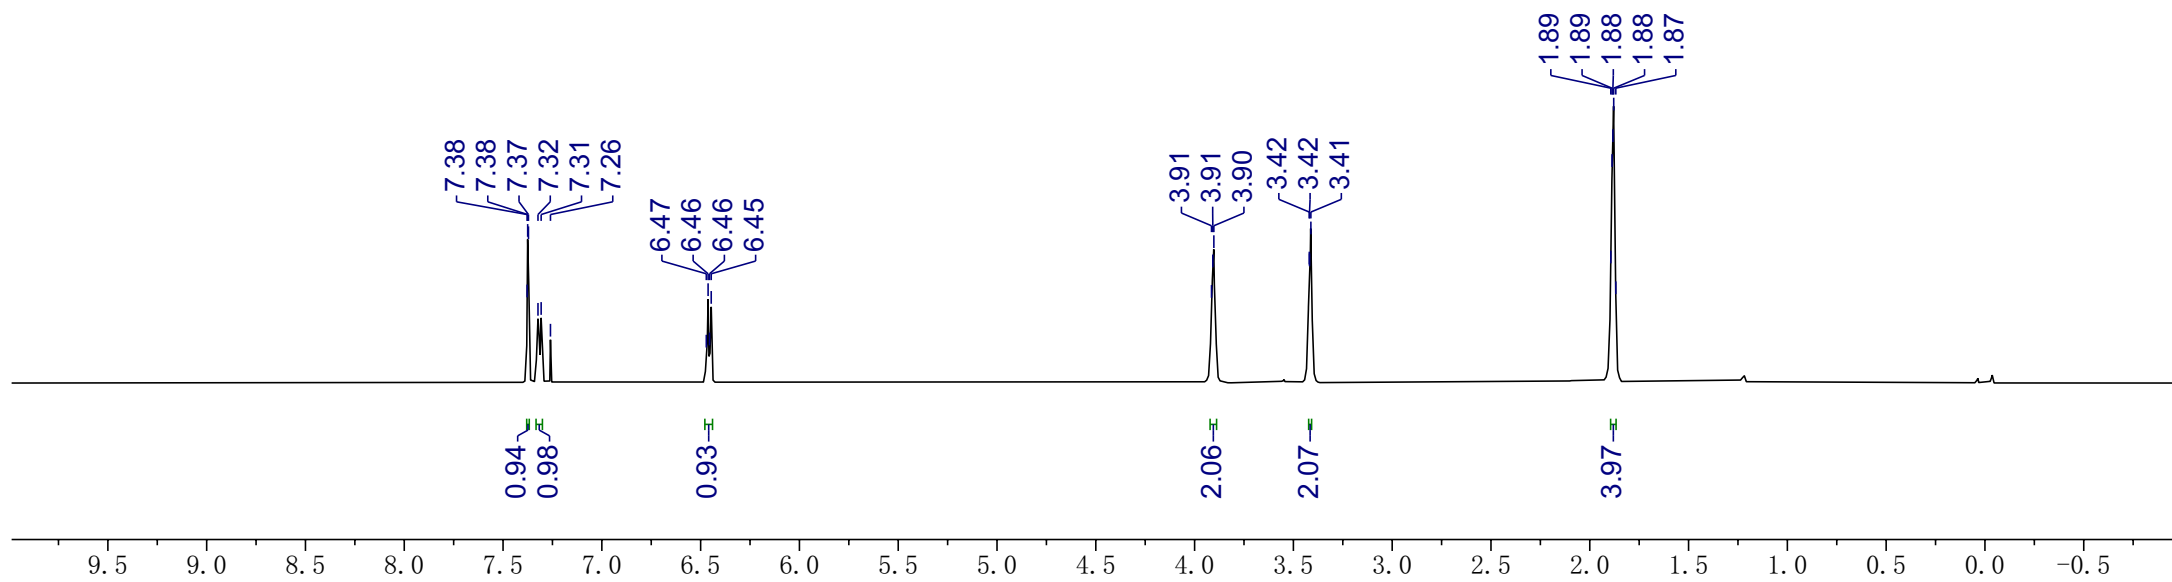

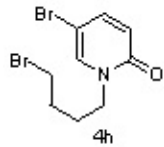

400 MHz, CDCl<sub>3</sub>

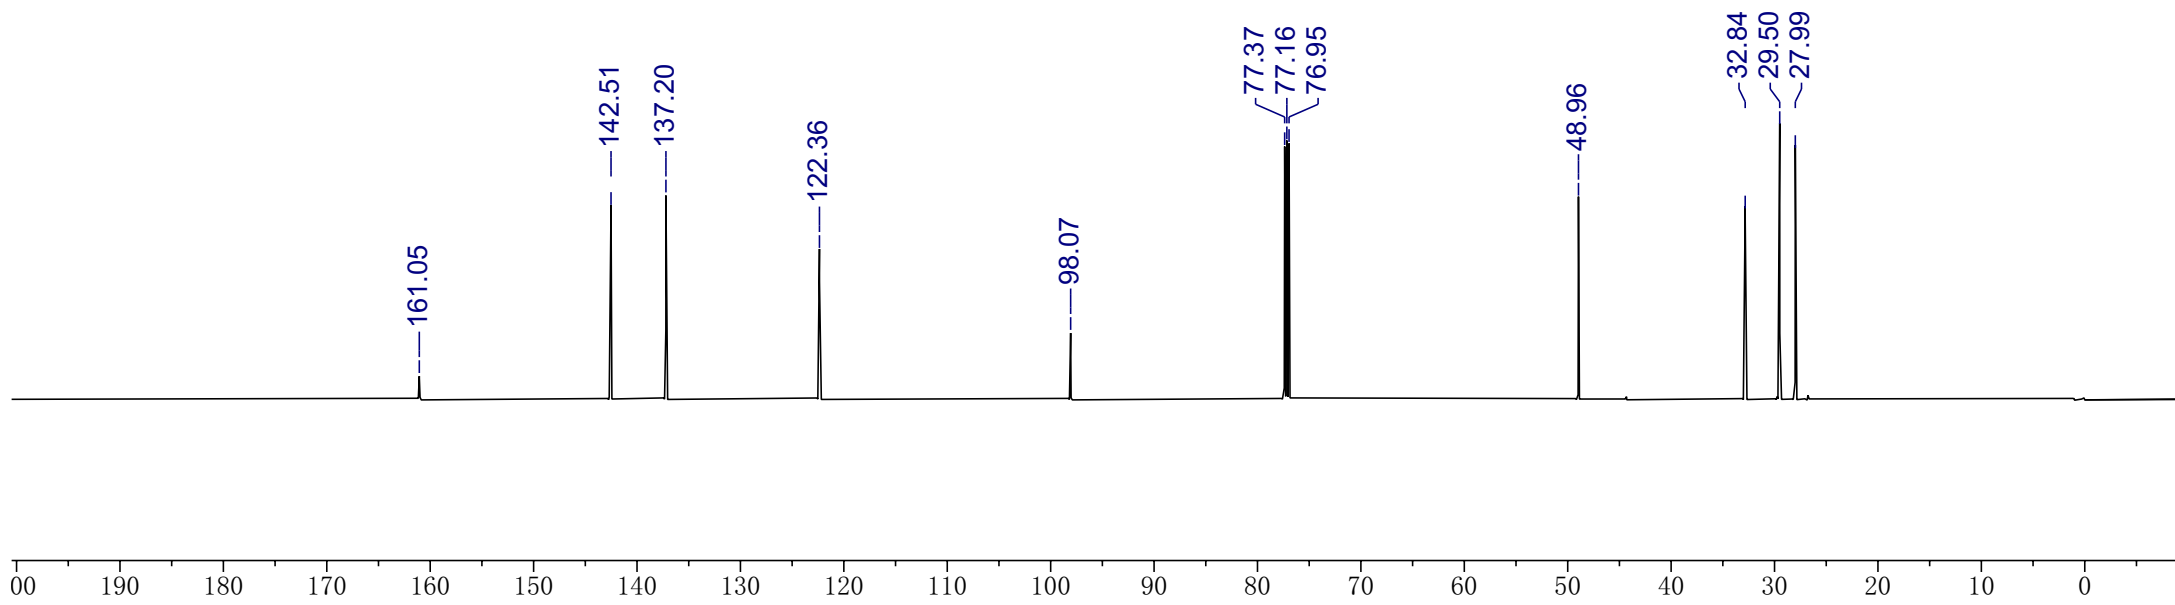

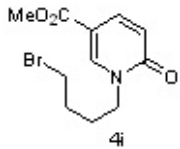

400 MHz, CDCl<sub>3</sub>

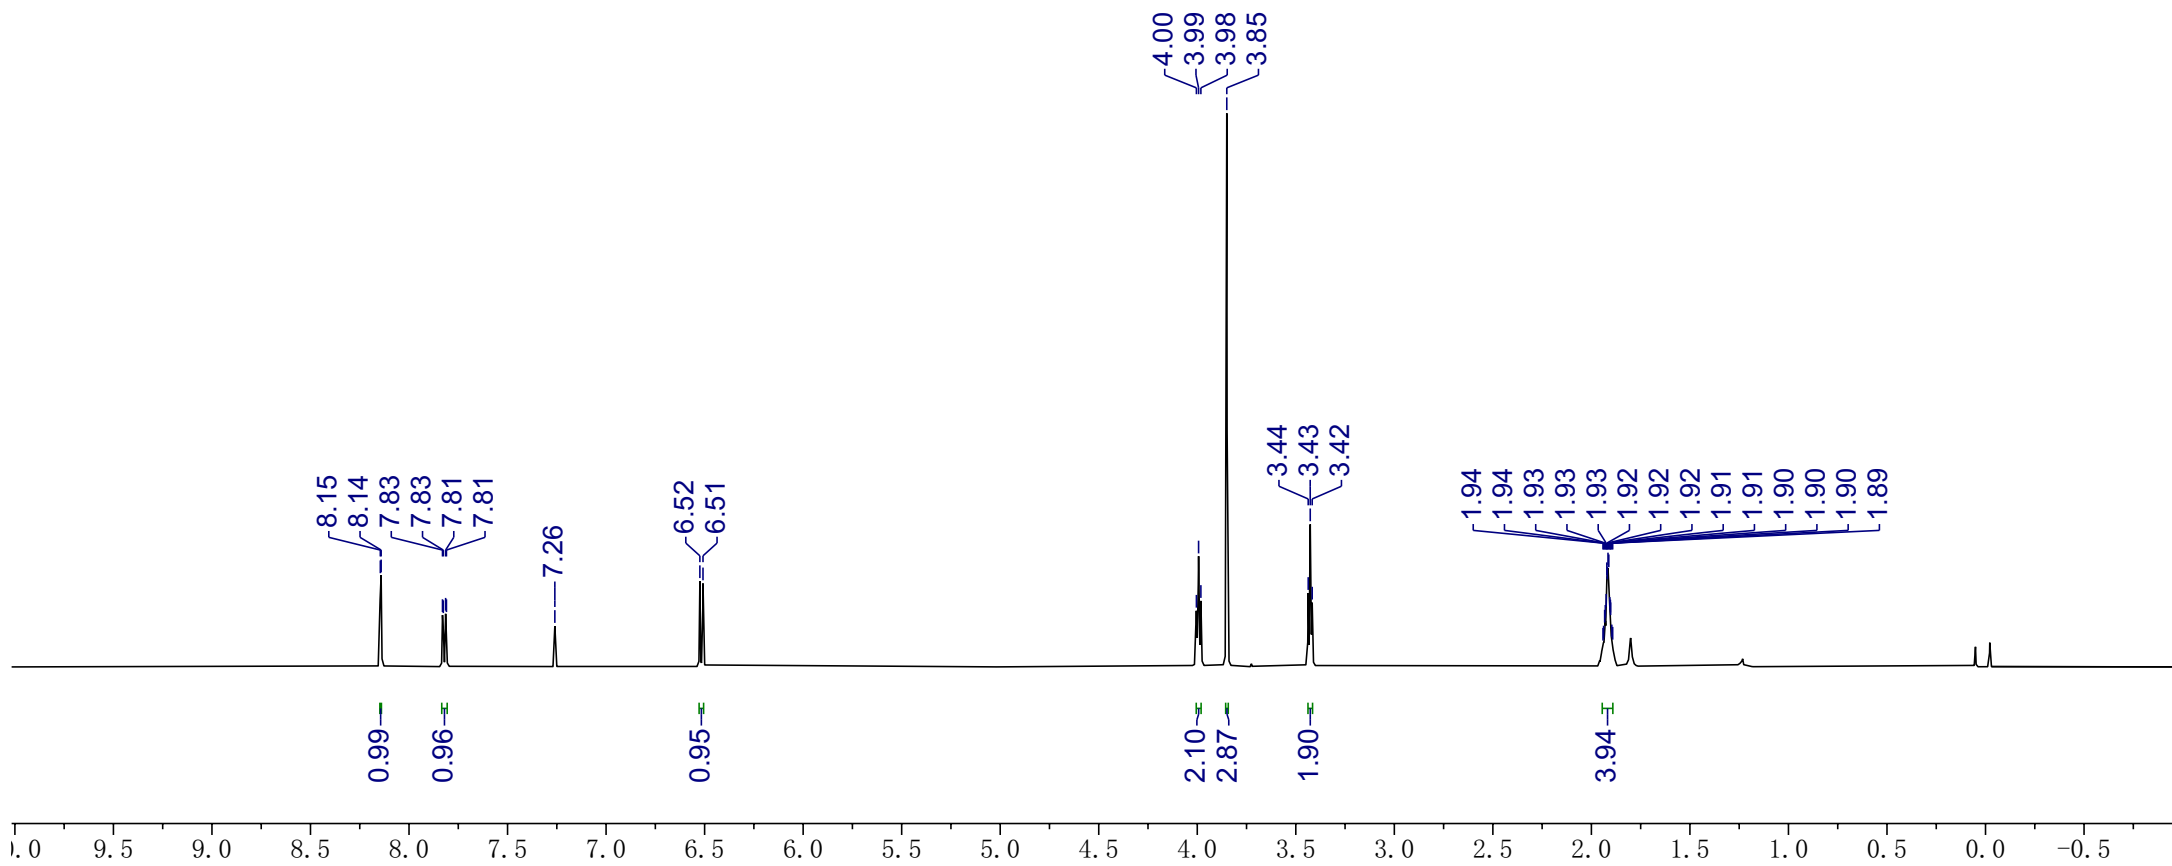



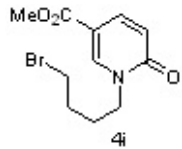

400 MHz, CDCl<sub>3</sub>

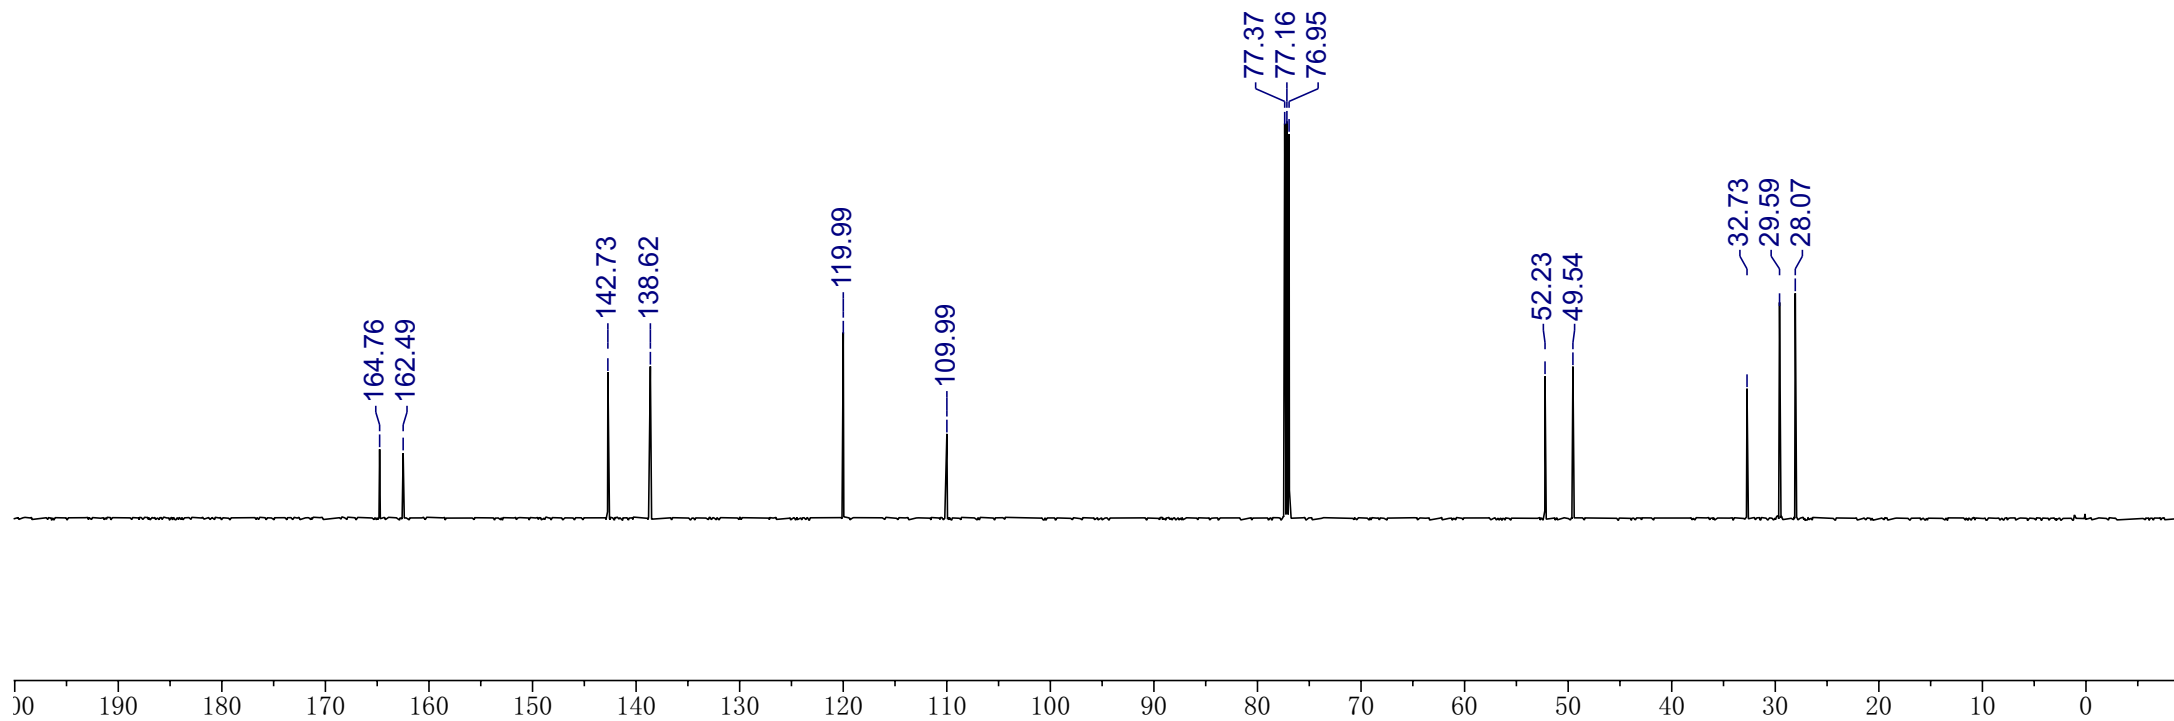

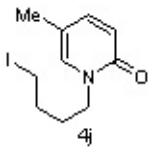

400 MHz, CDCl<sub>3</sub>

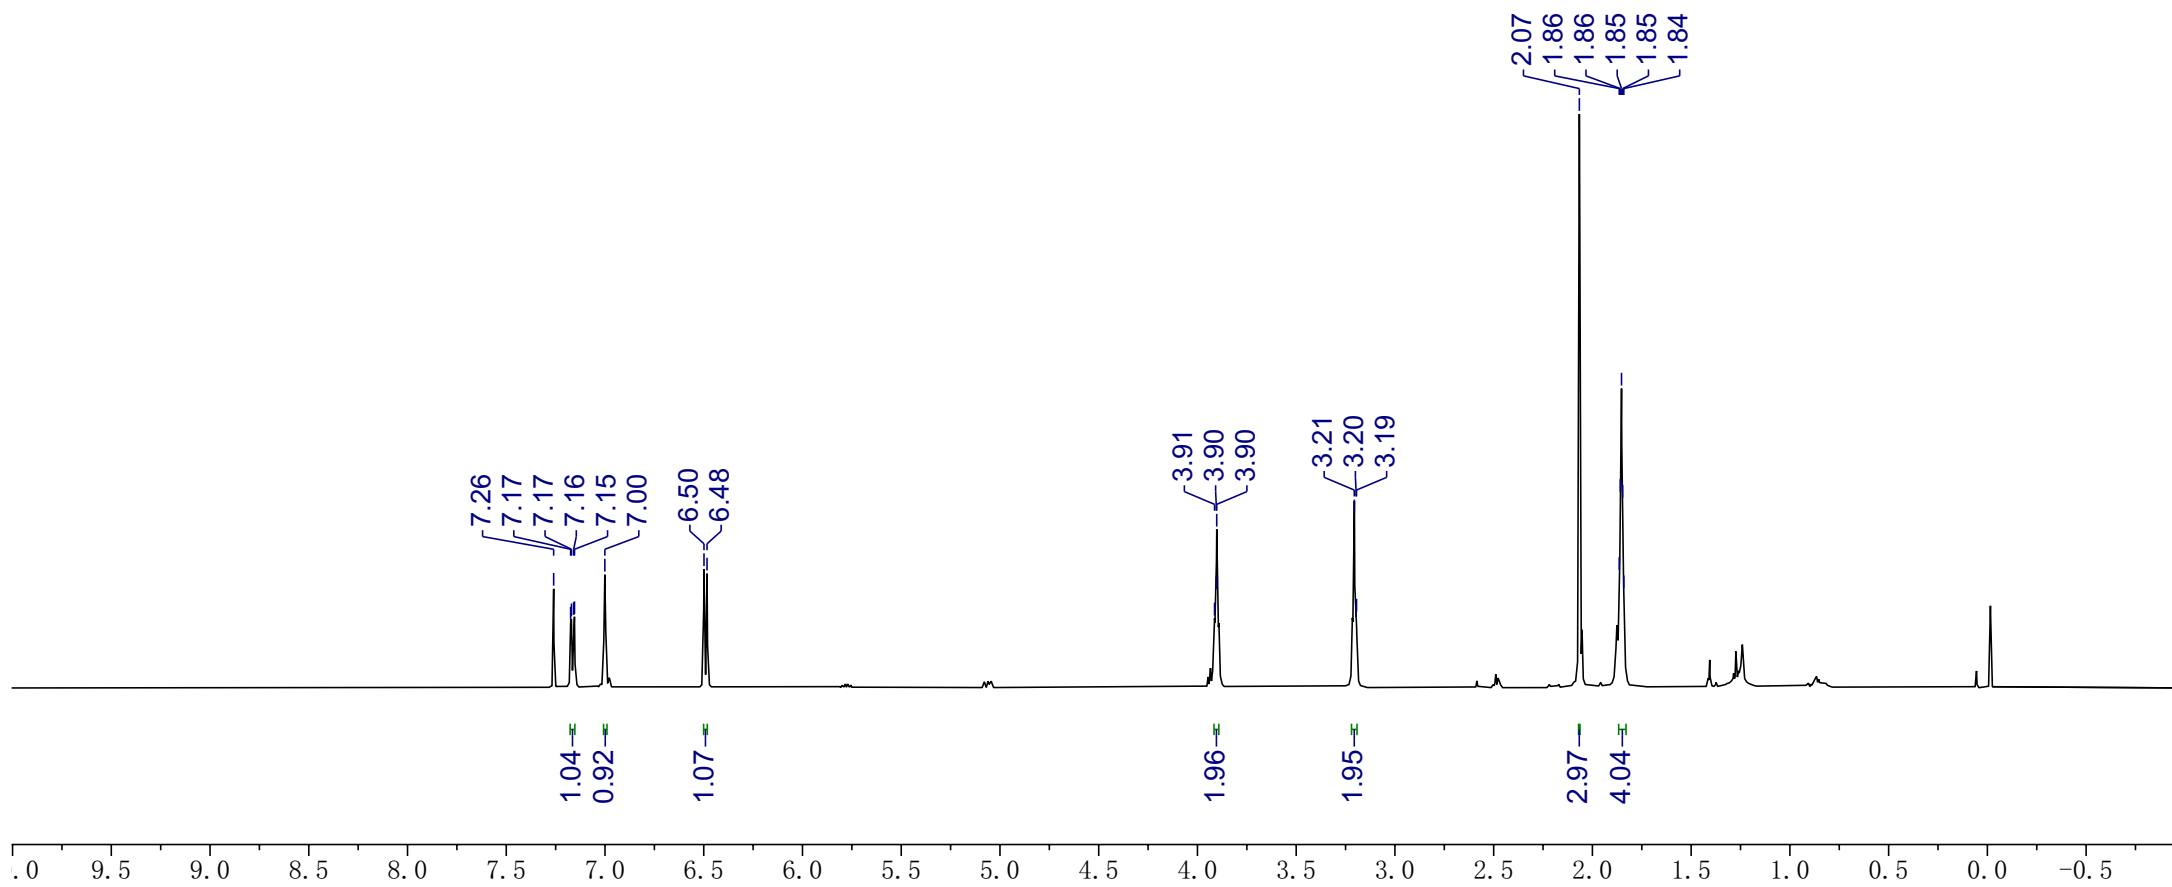

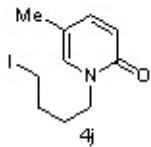

400 MHz, CDCl<sub>3</sub>

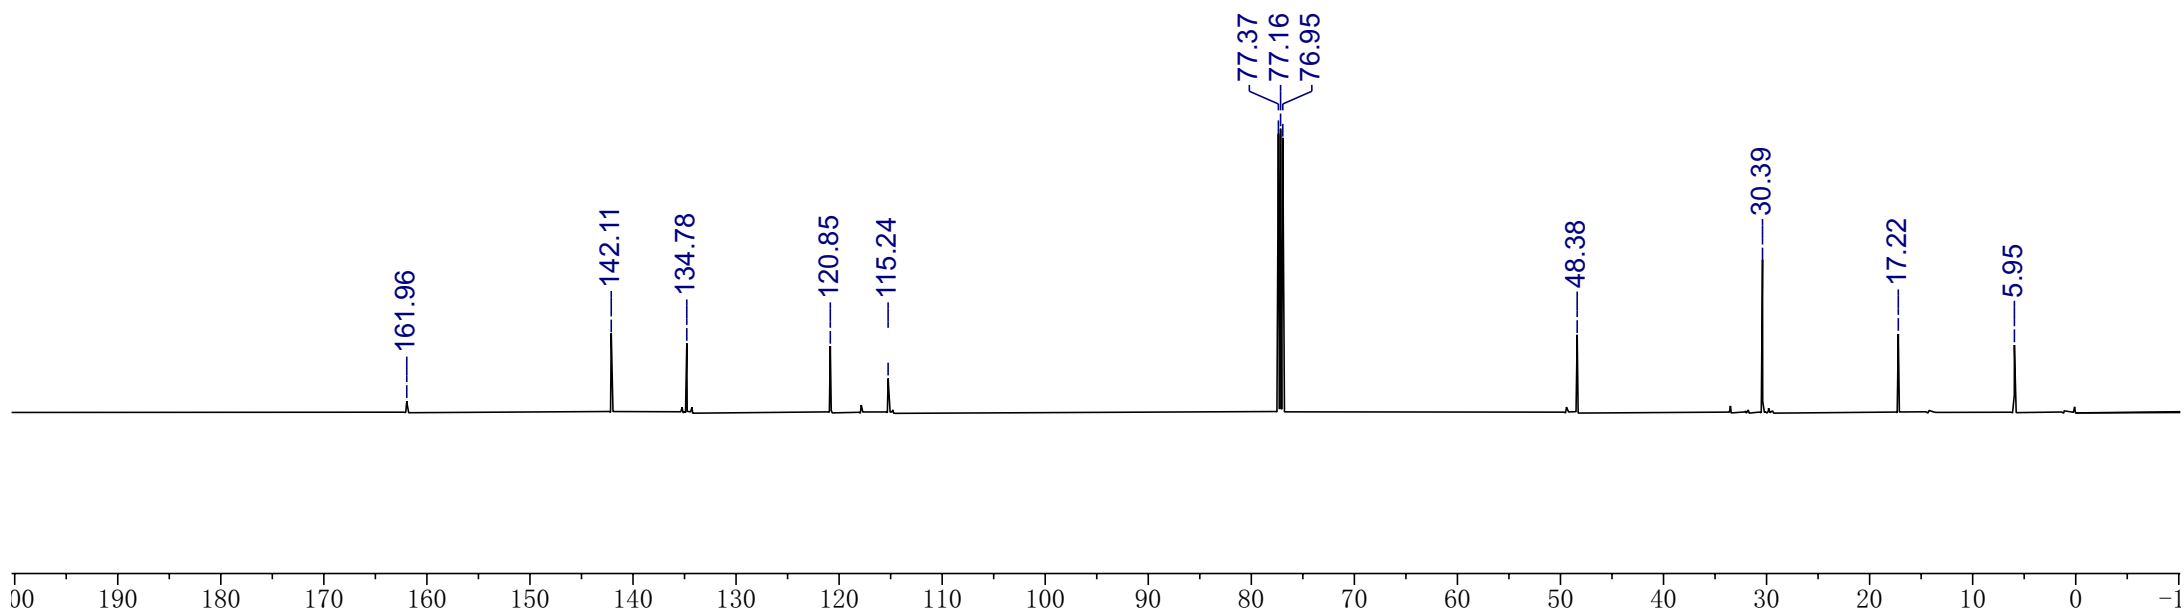

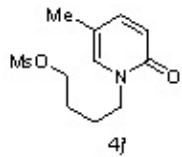

400 MHz, CDCl<sub>3</sub>

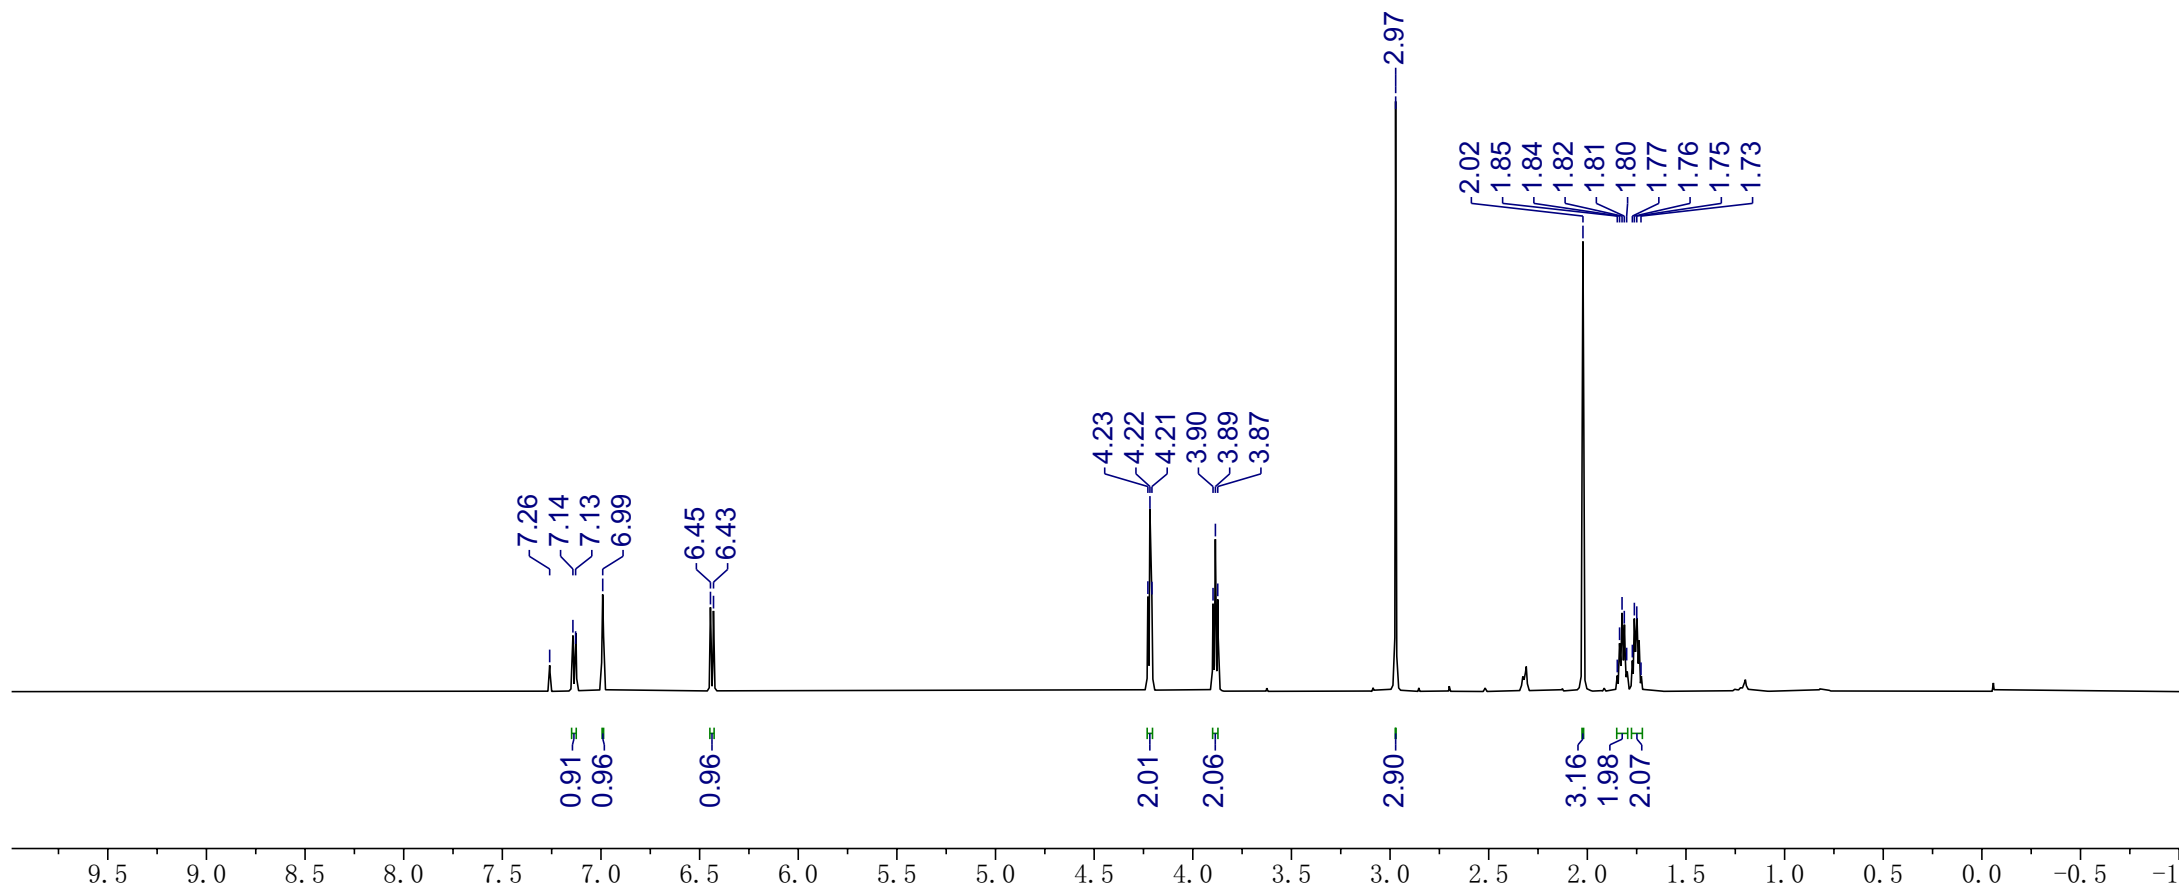



400 MHz, CDCl<sub>3</sub>

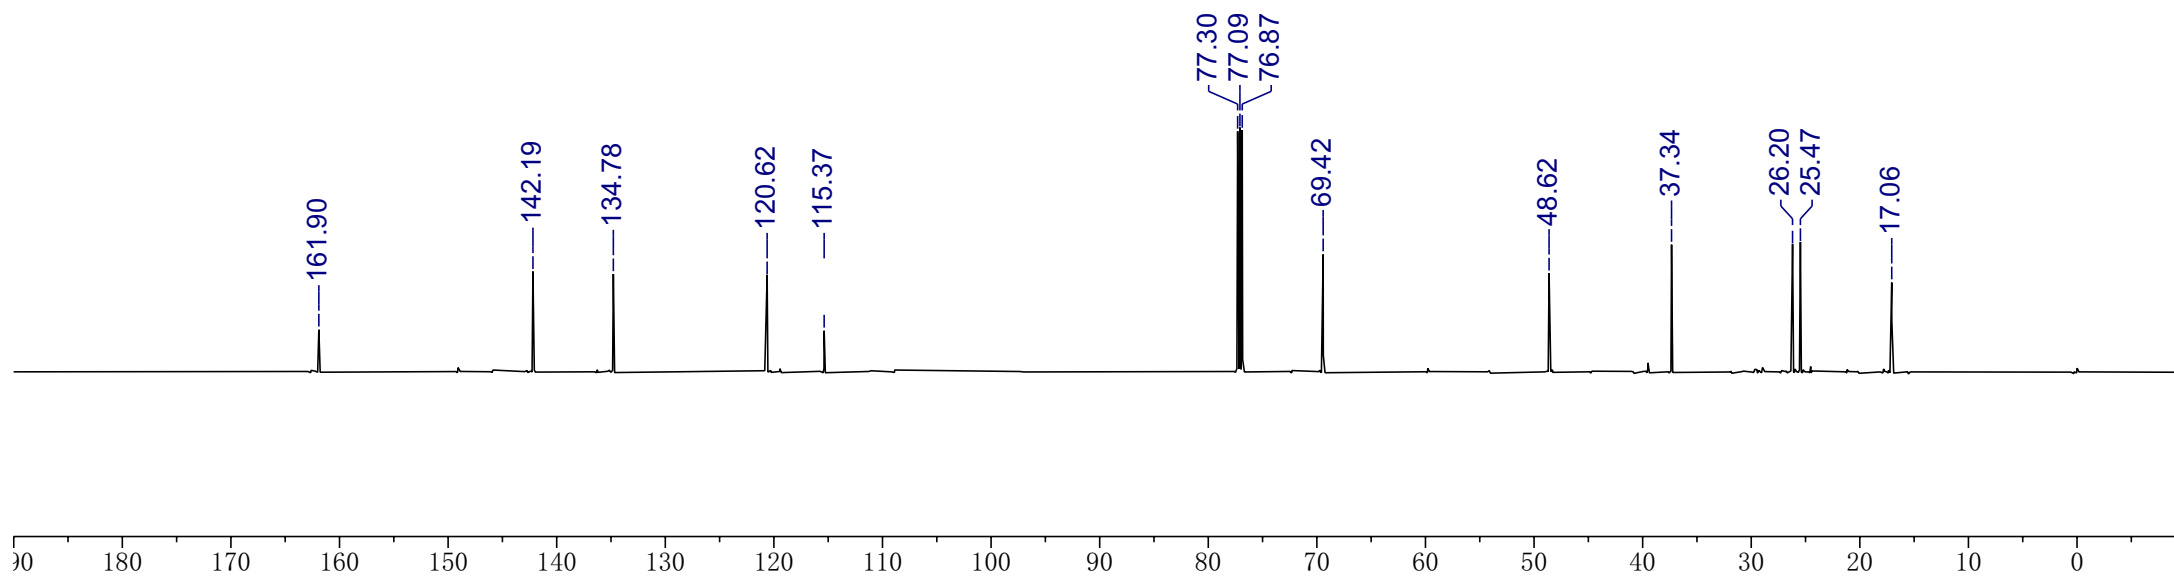

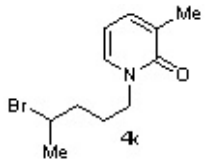

400 MHz, CDCl<sub>3</sub>

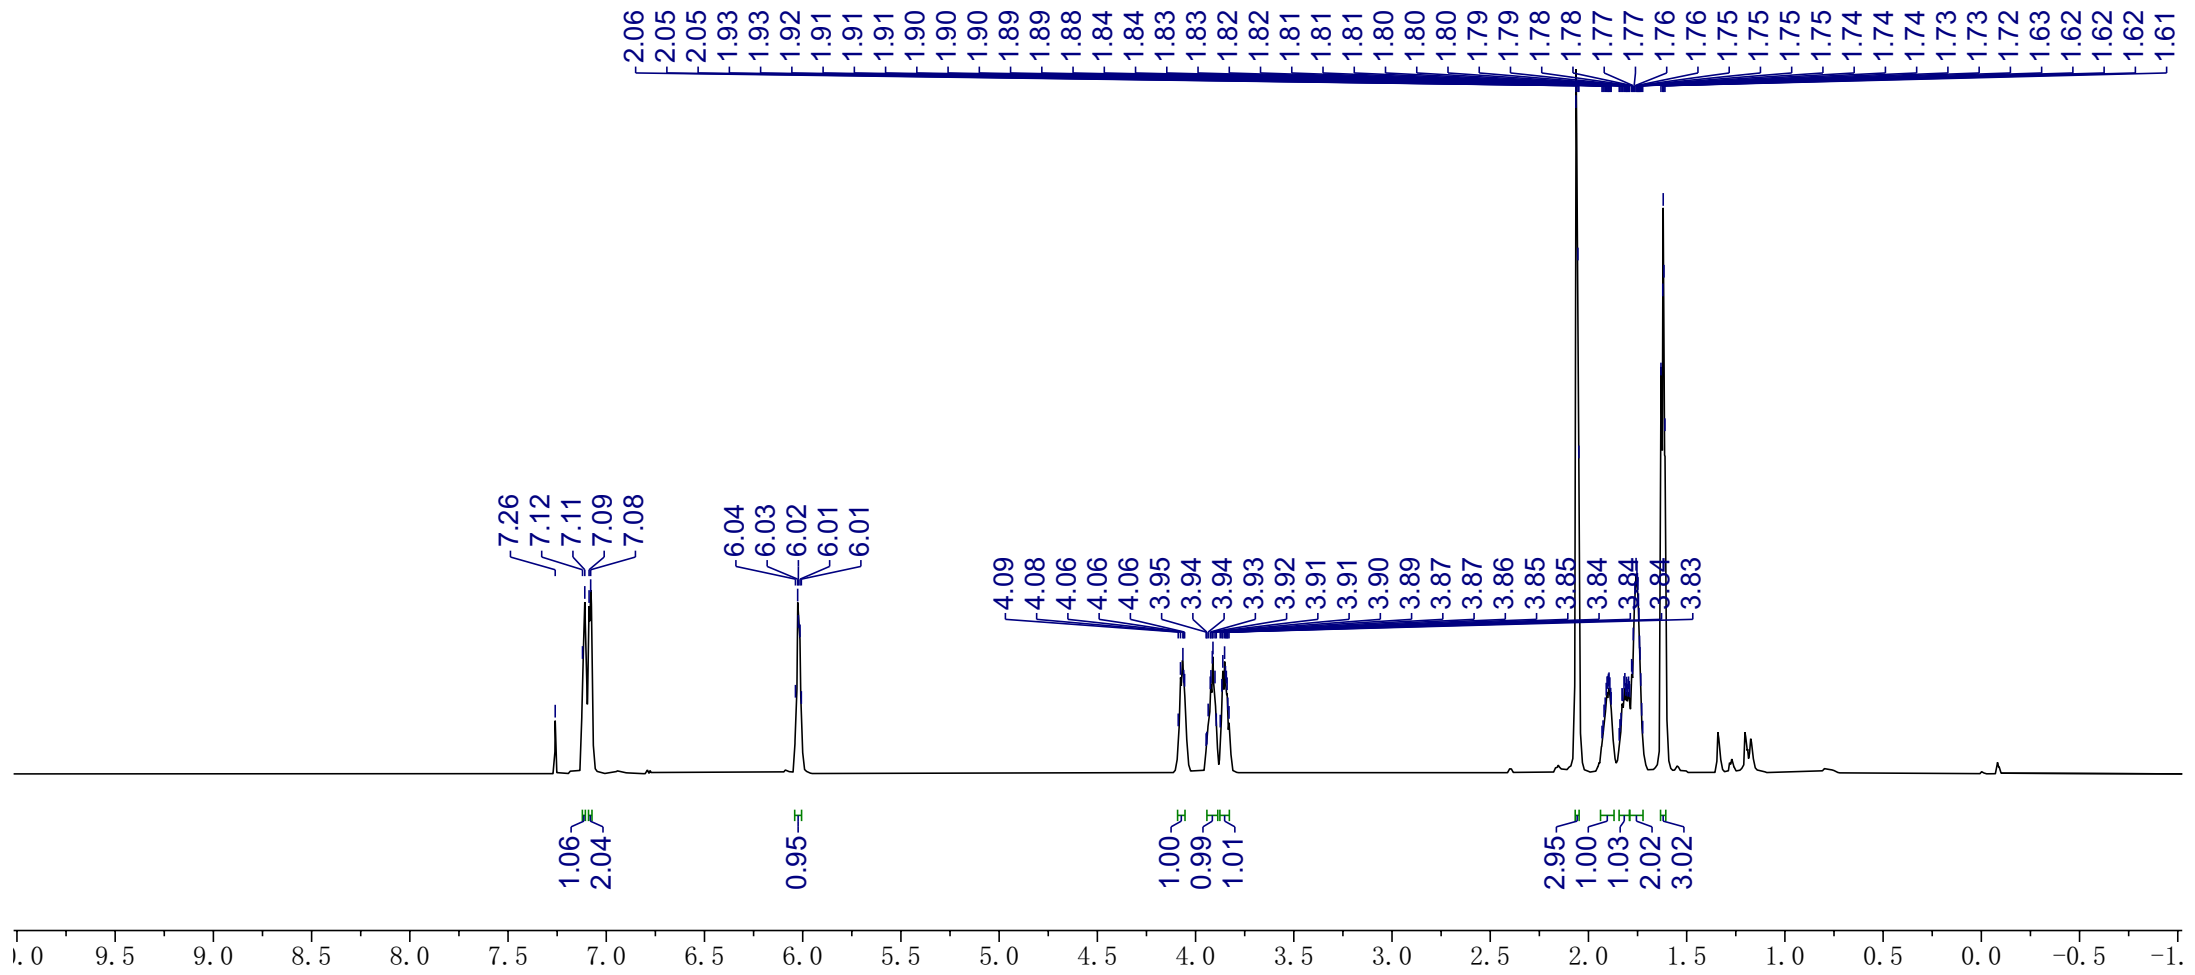

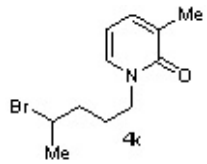

400 MHz, CDCl<sub>3</sub>

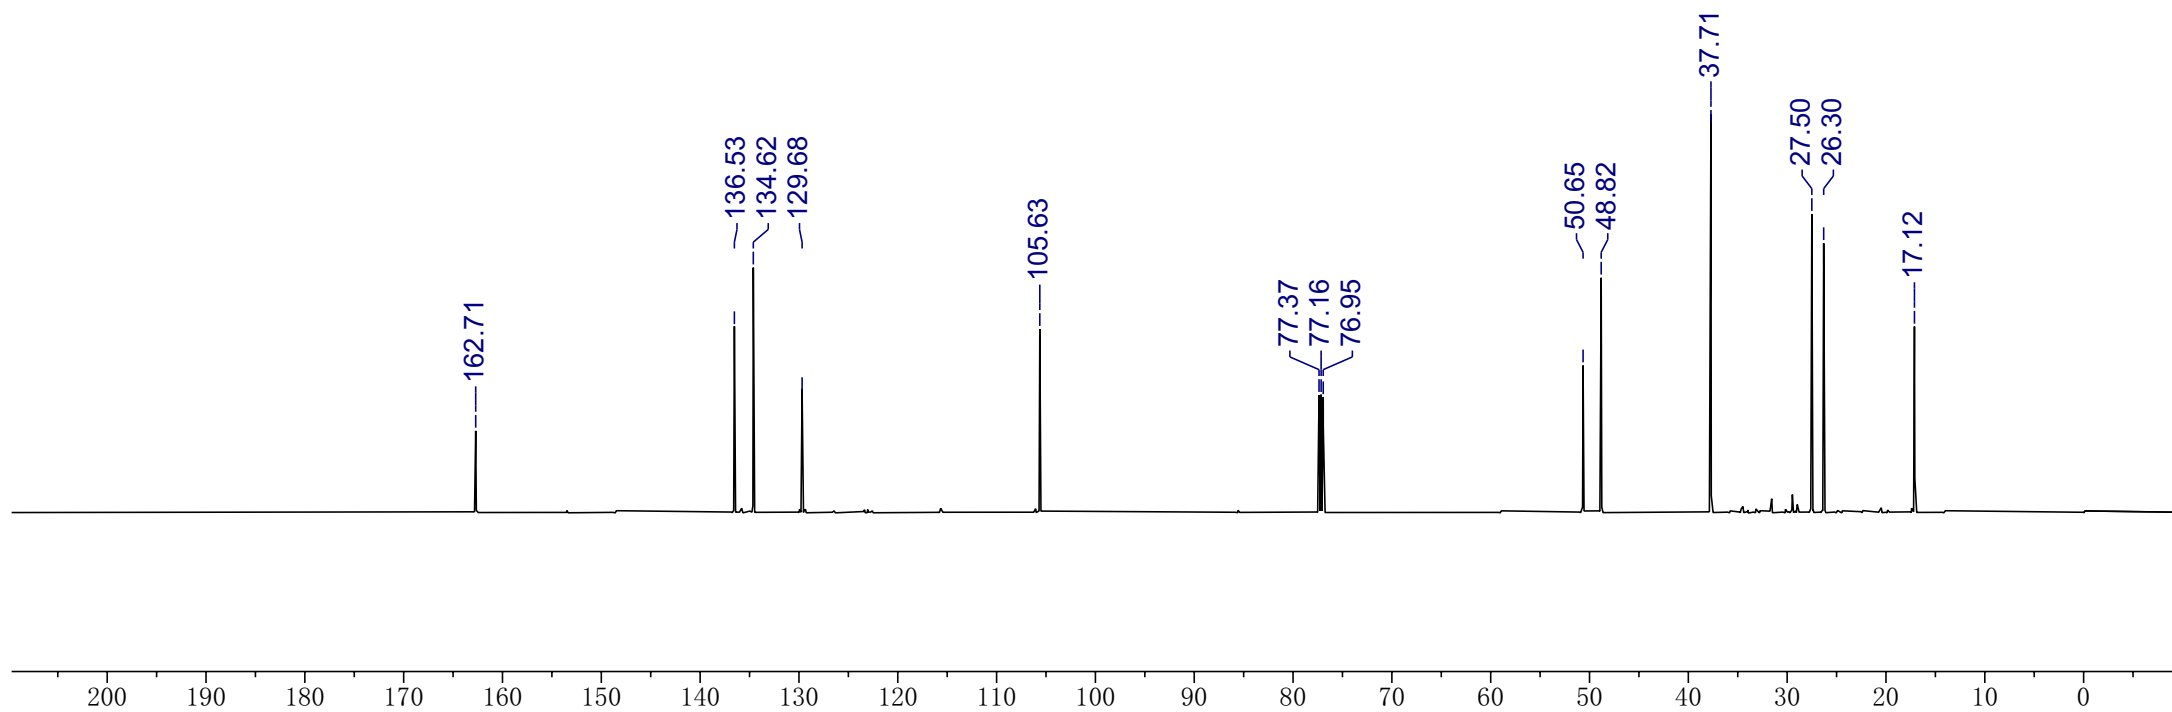

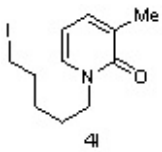

400 MHz, CDCl<sub>3</sub>

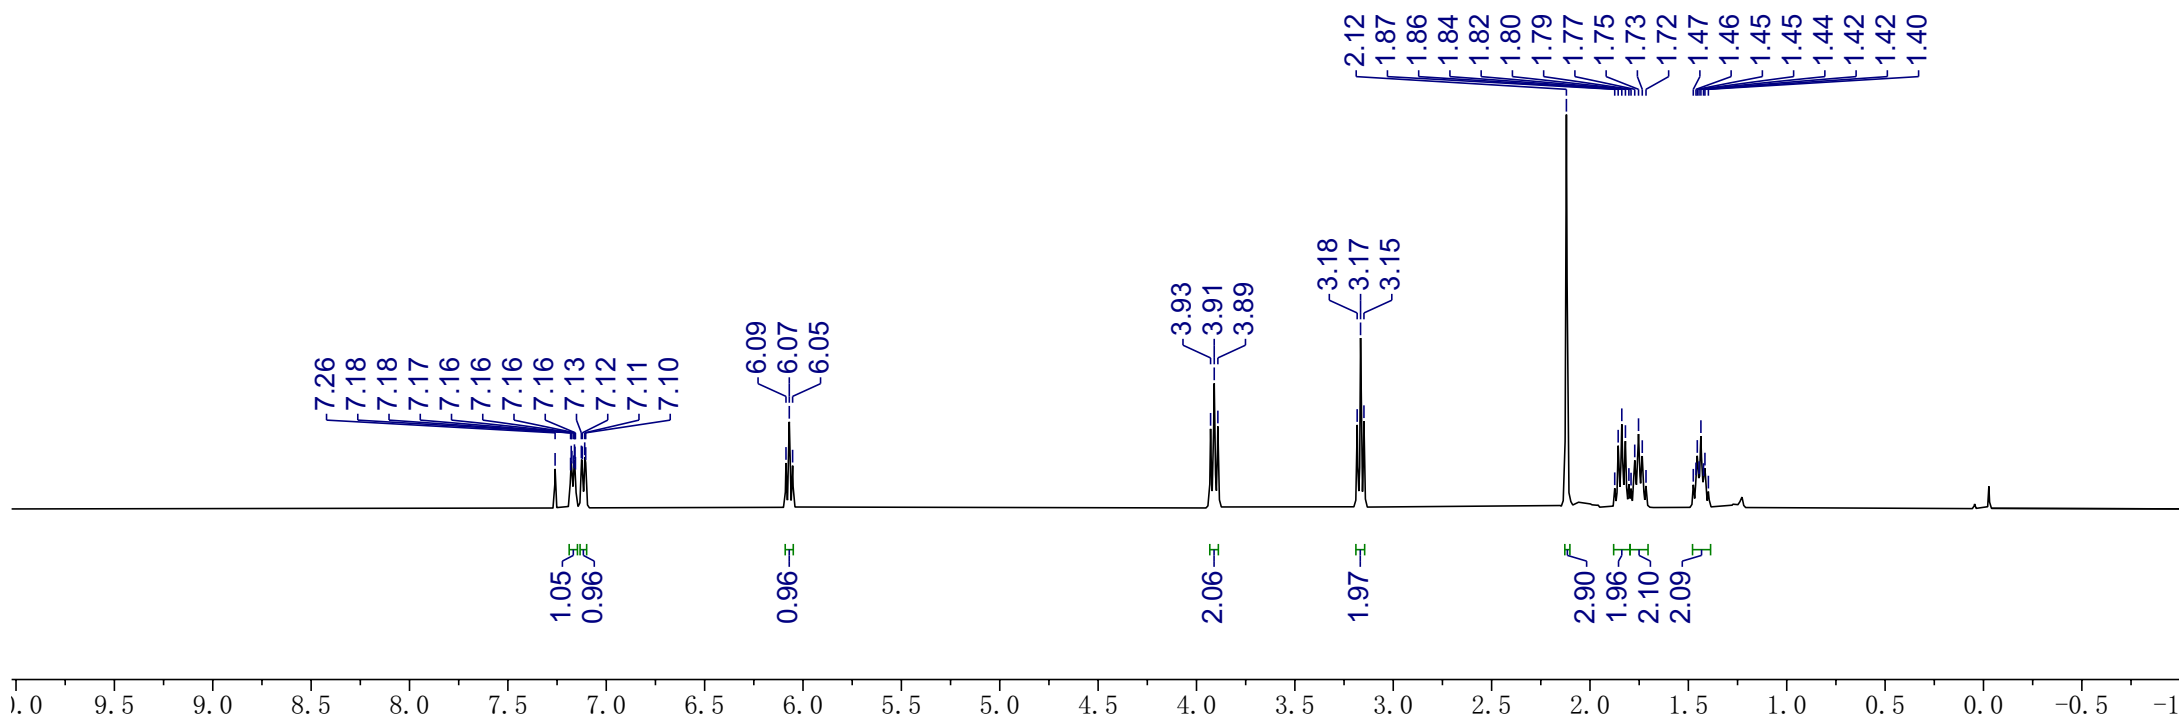



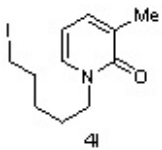

400 MHz, CDCl<sub>3</sub>

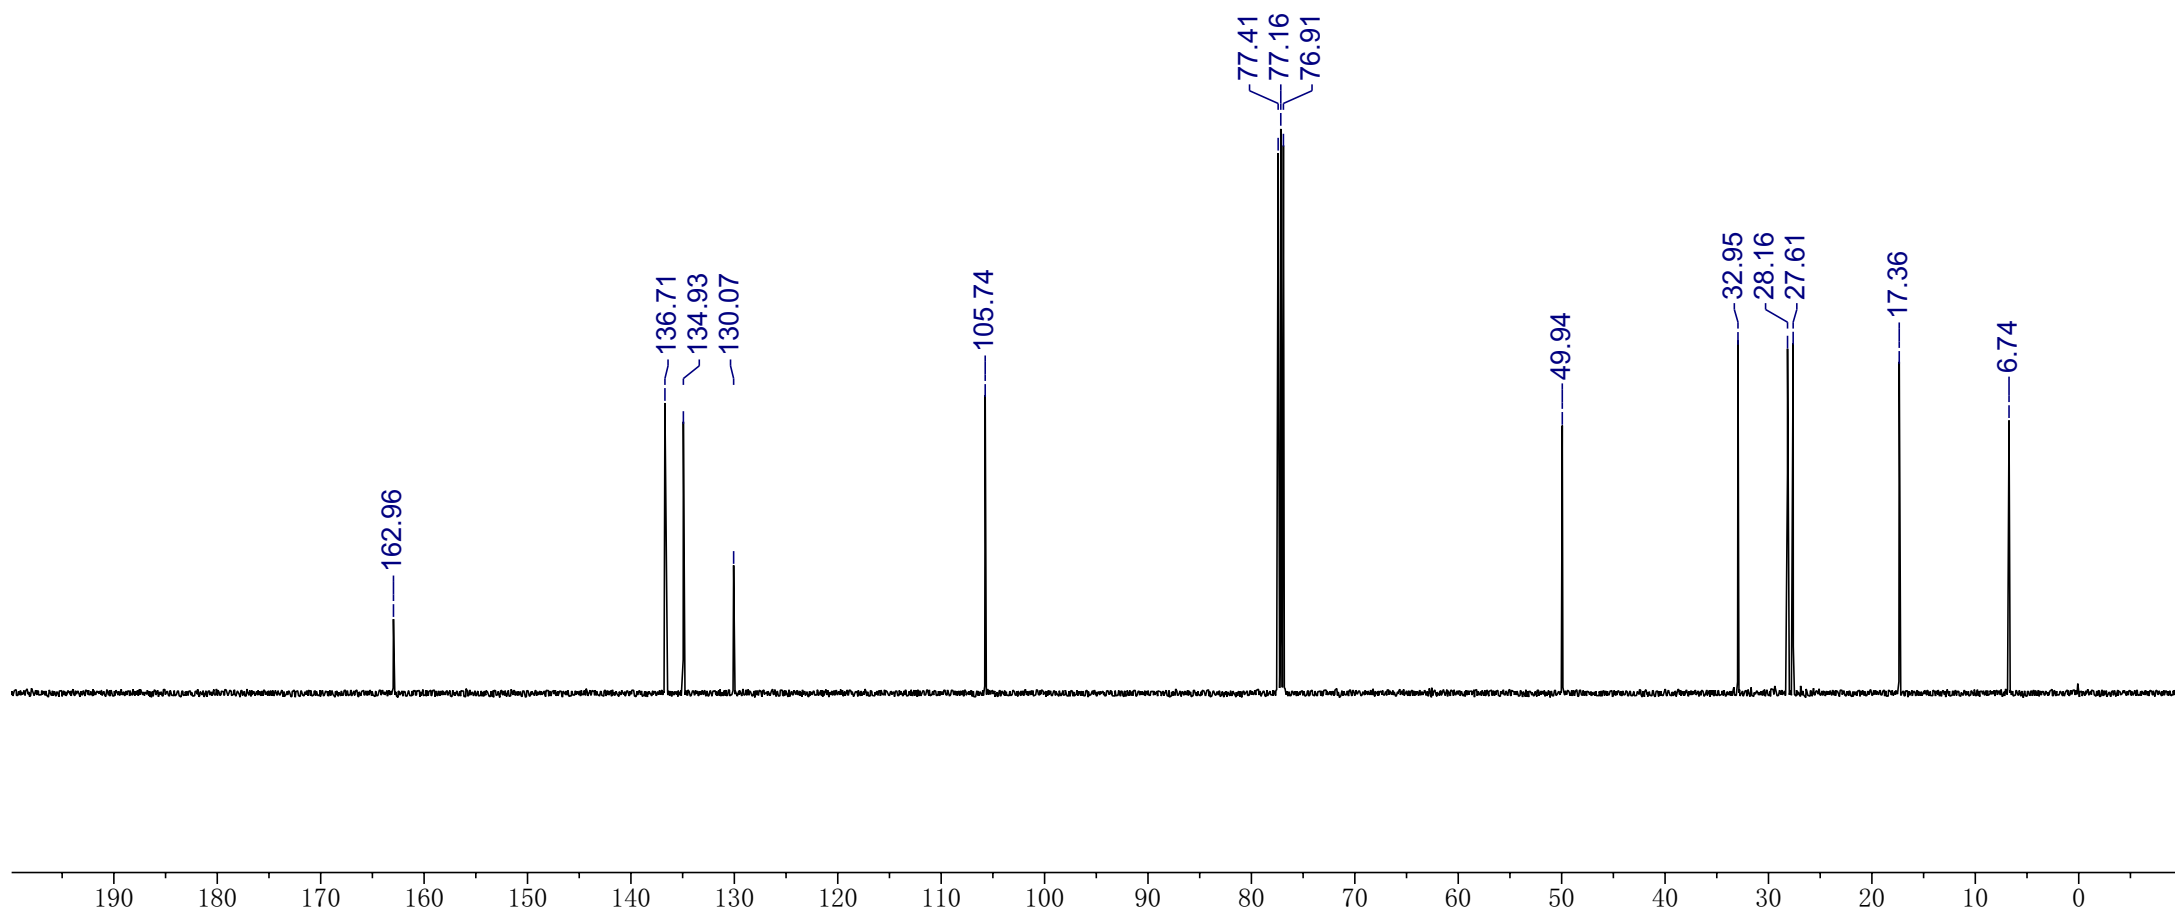

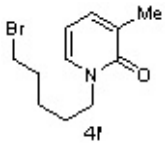

400 MHz, CDCl<sub>3</sub>

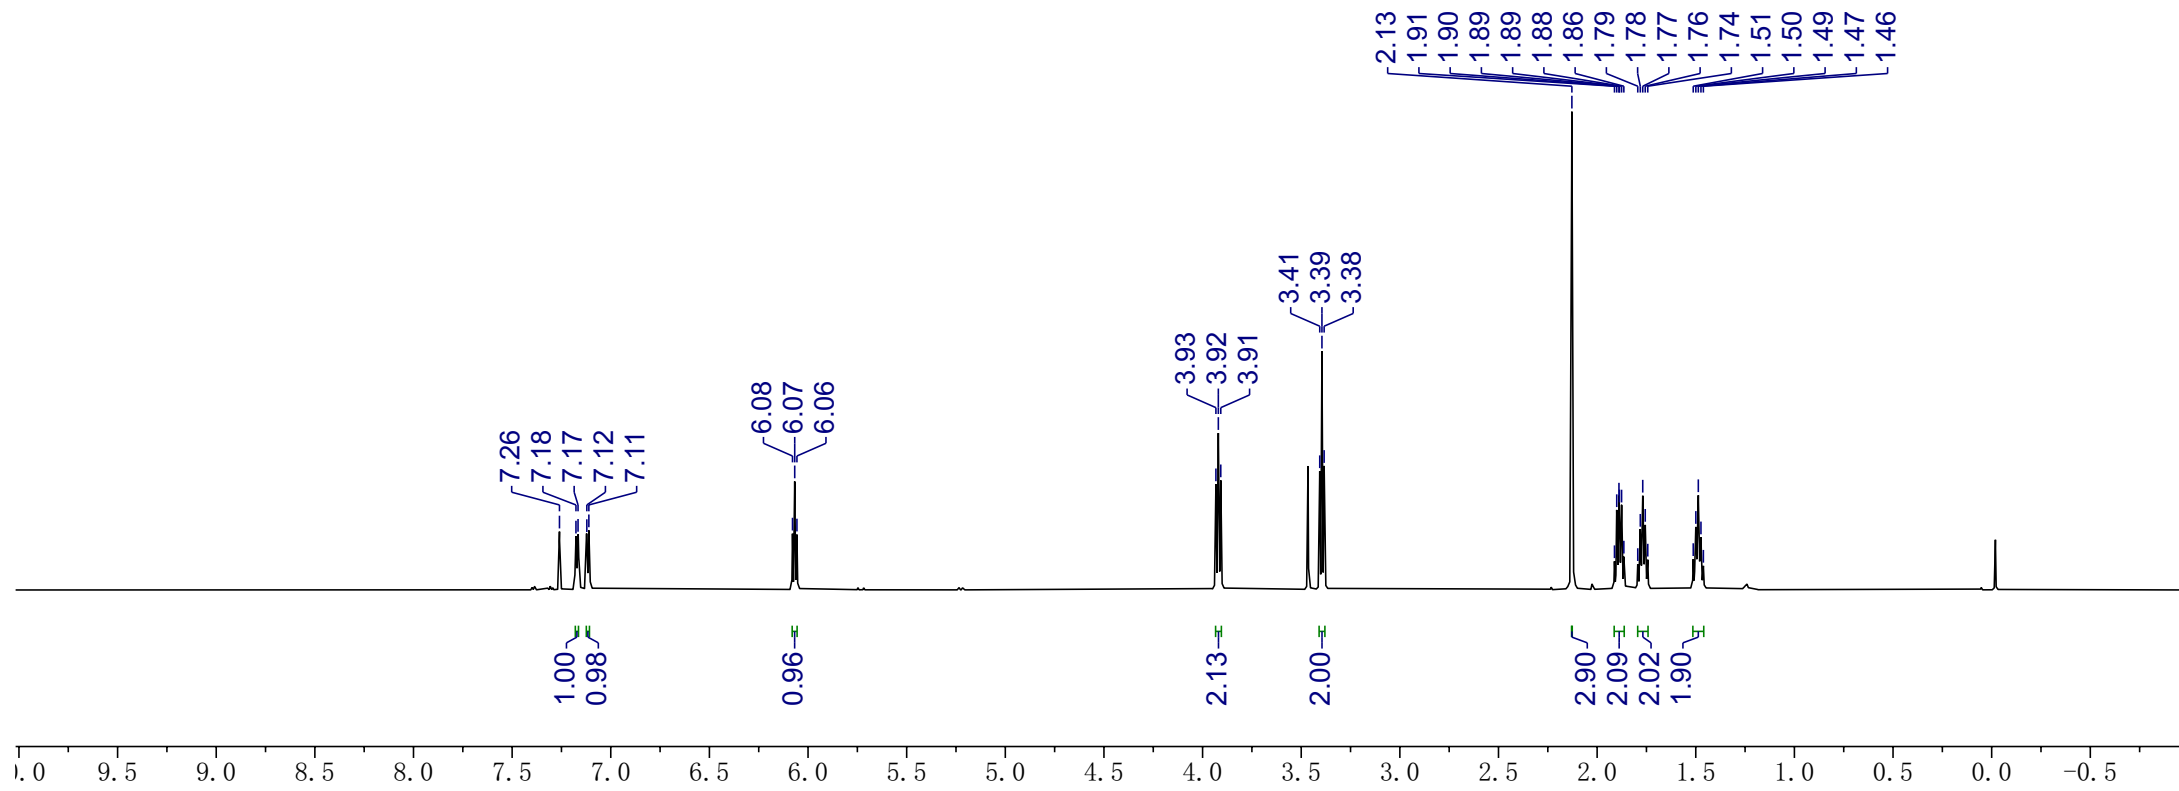

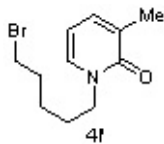

400 MHz, CDCl<sub>3</sub>

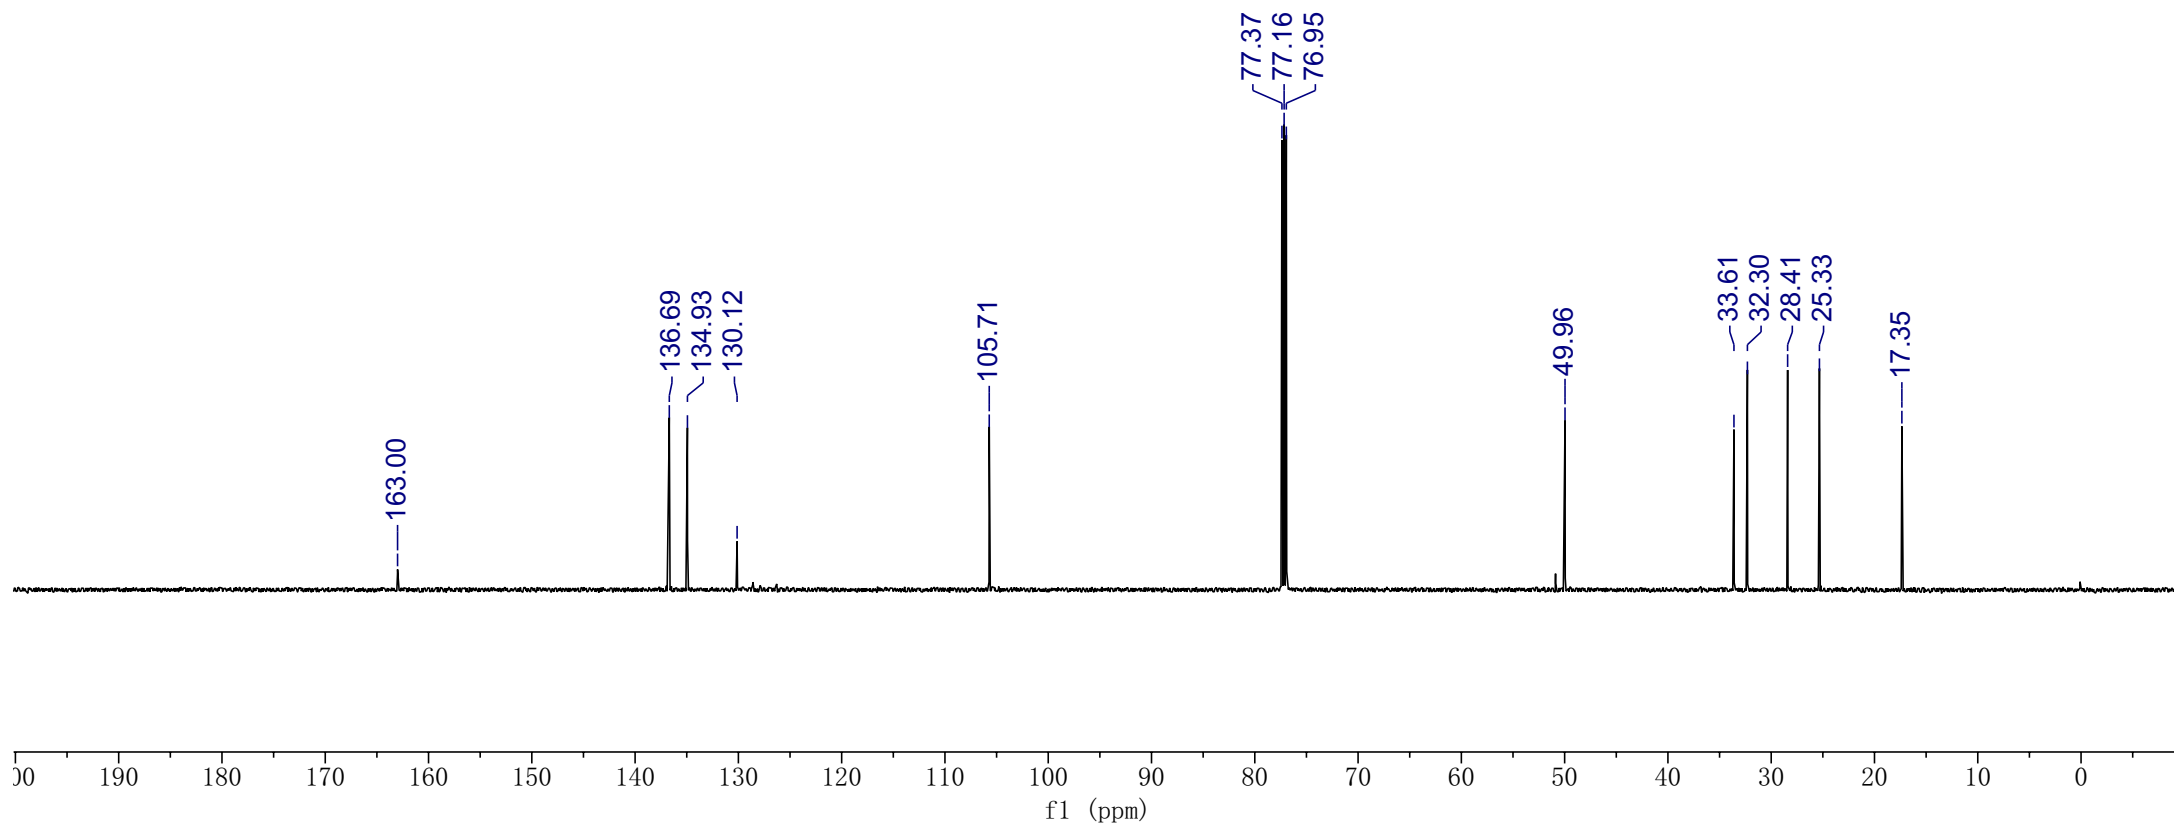

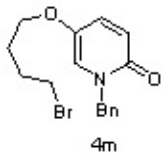

400 MHz, CDCl<sub>3</sub>

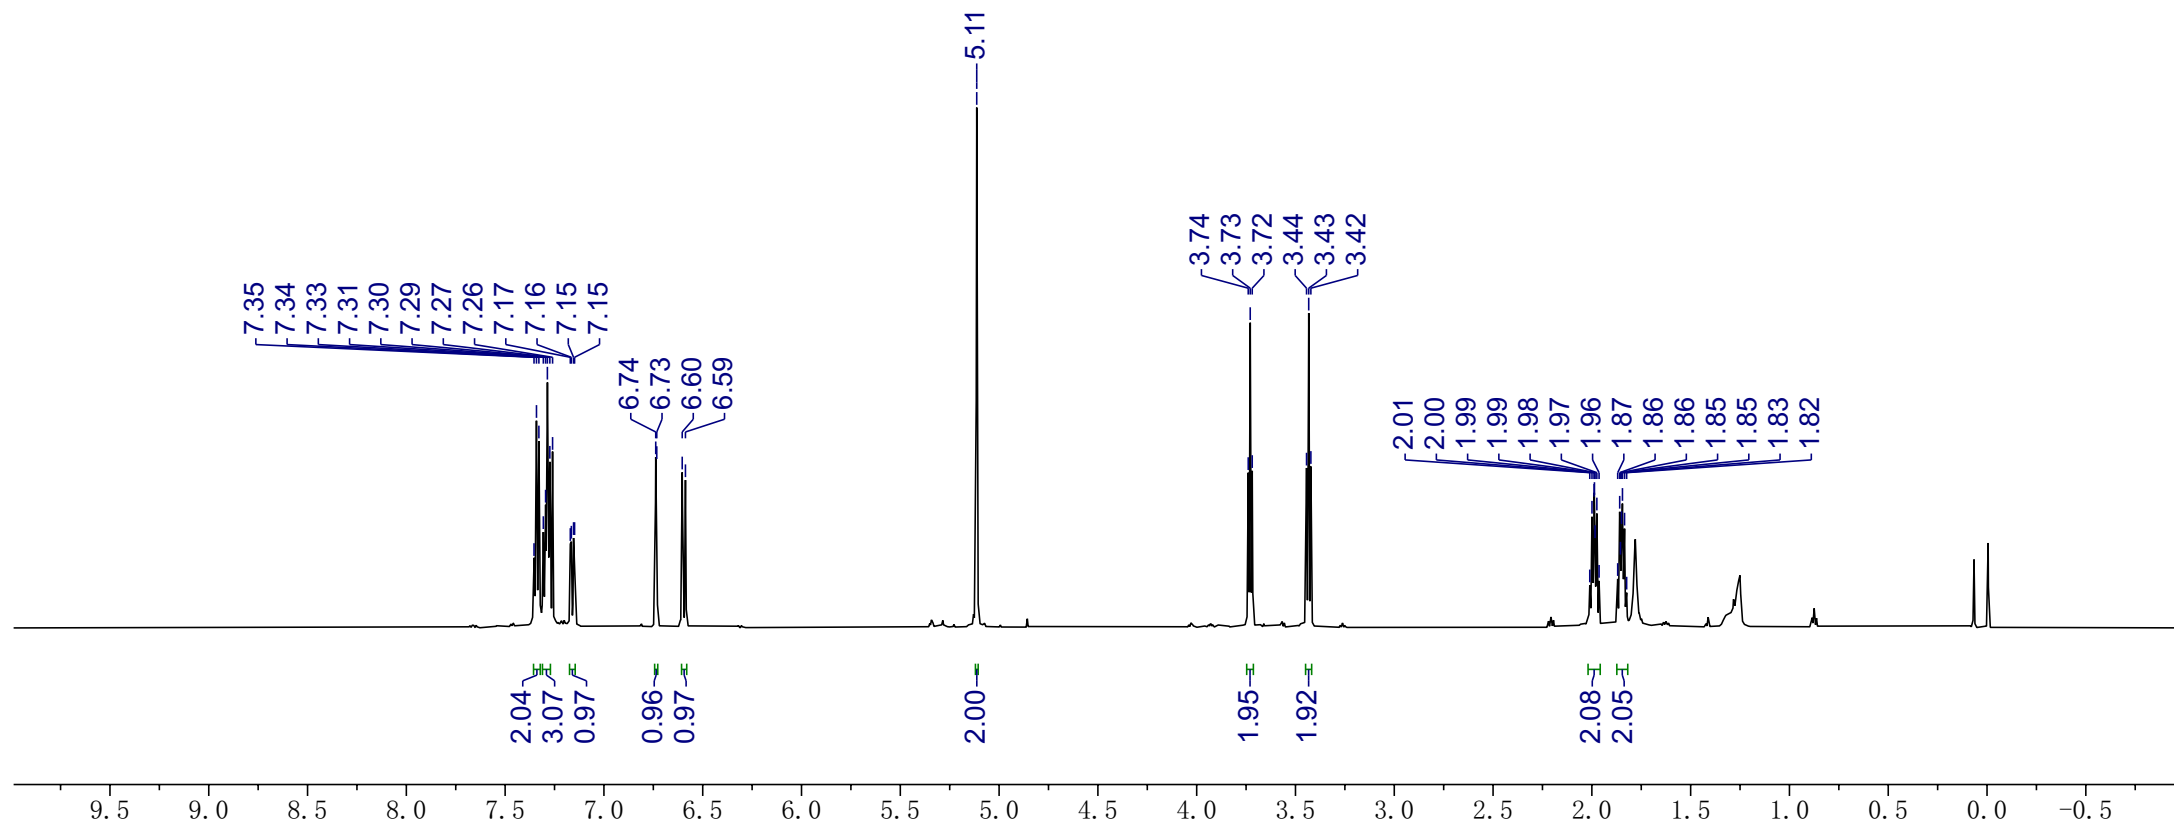



400 MHz, CDCl<sub>3</sub>

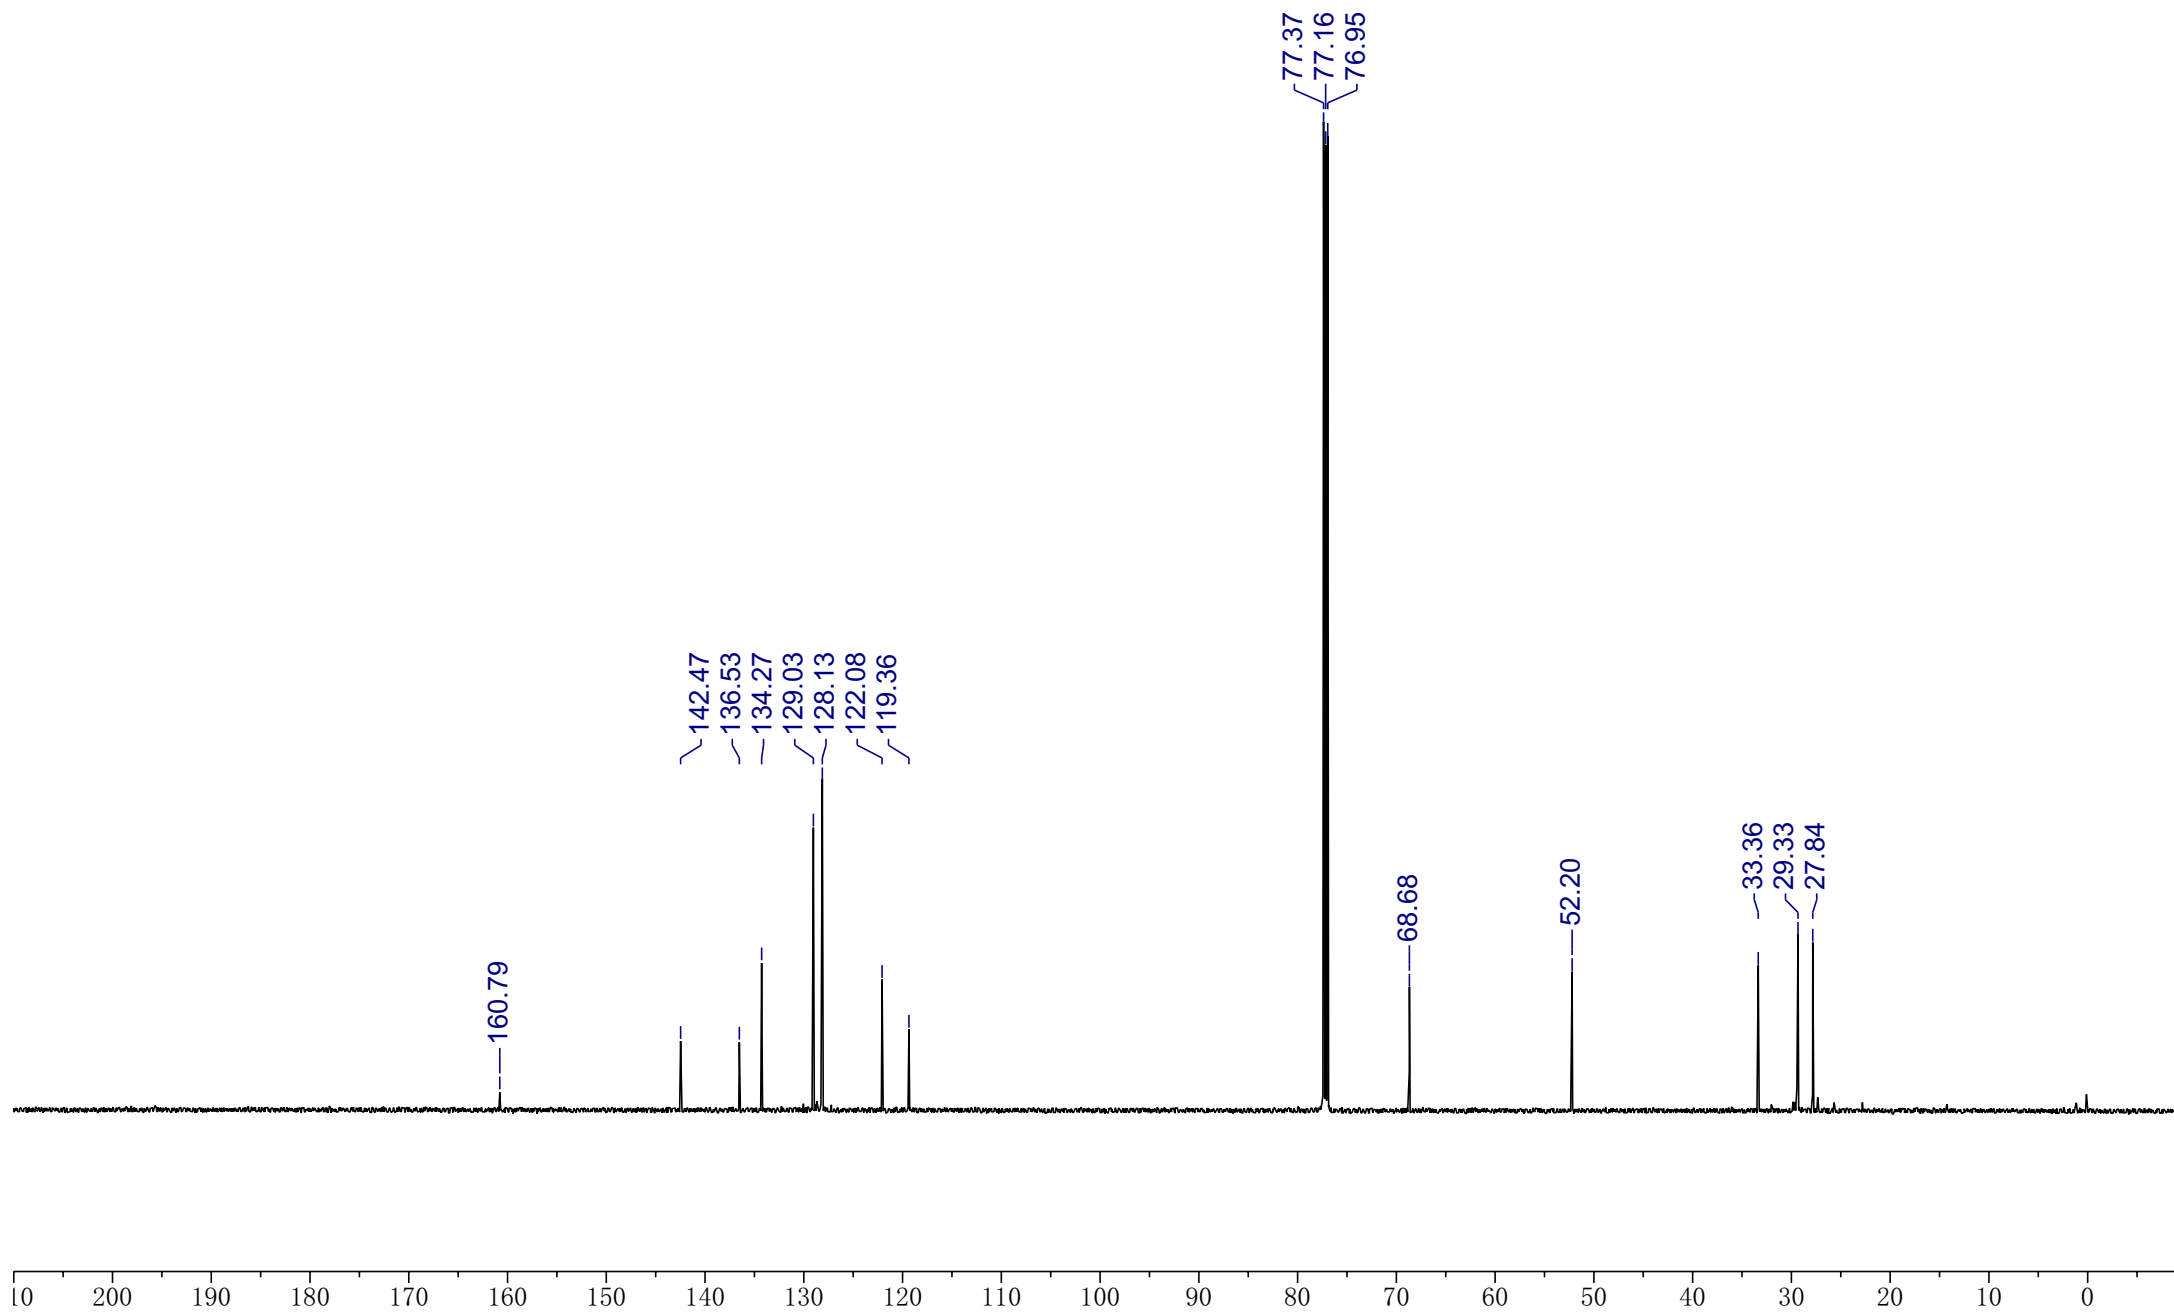

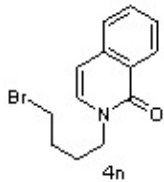

400 MHz, CDCl<sub>3</sub>

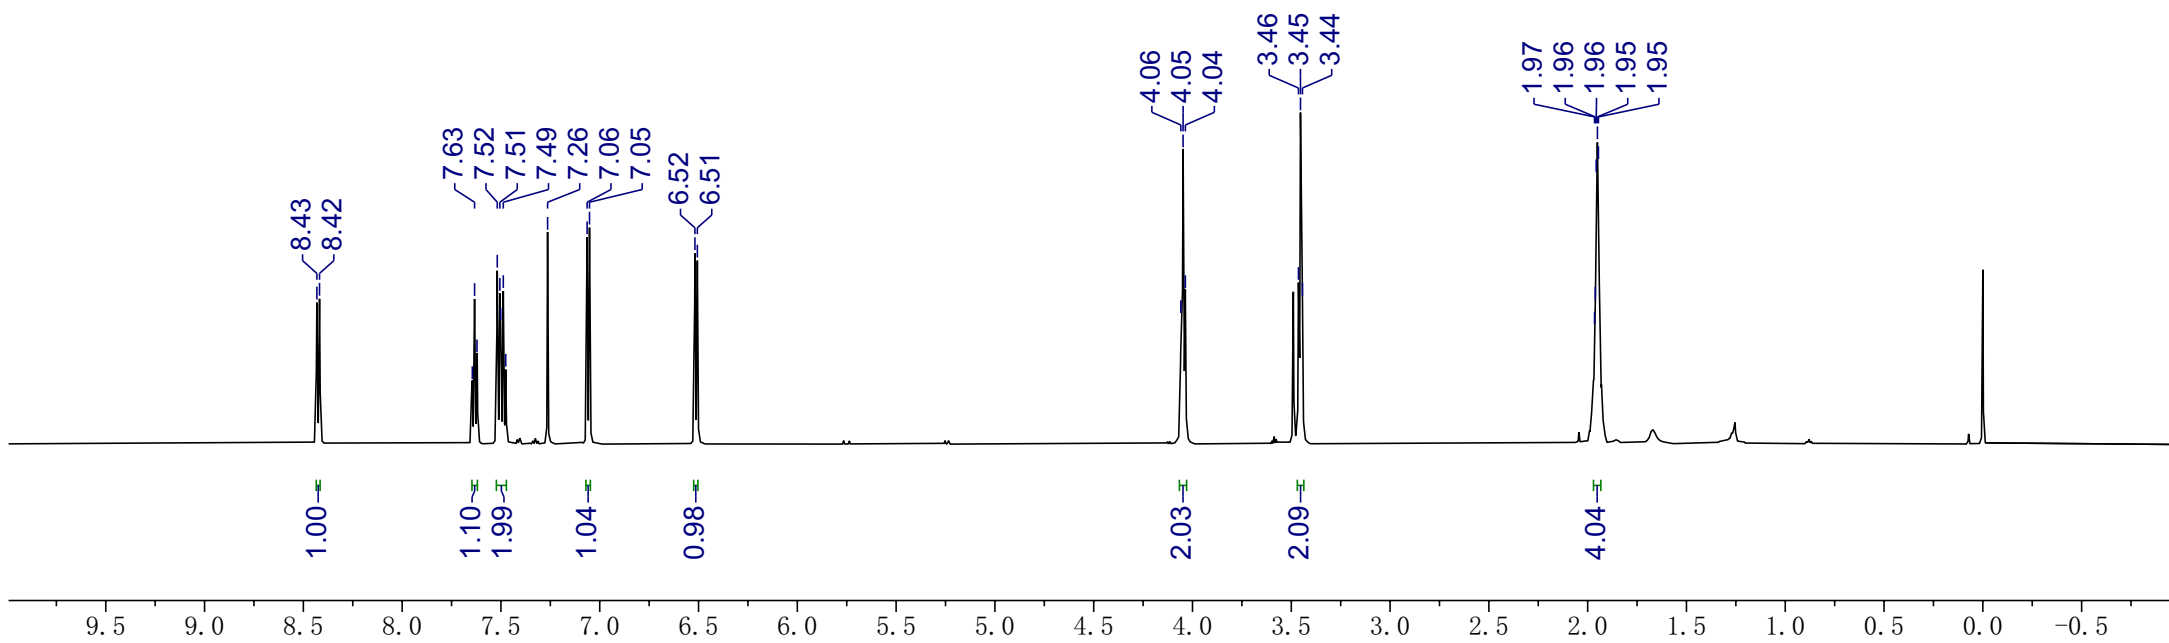

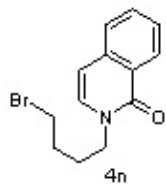

400 MHz, CDCl<sub>3</sub>

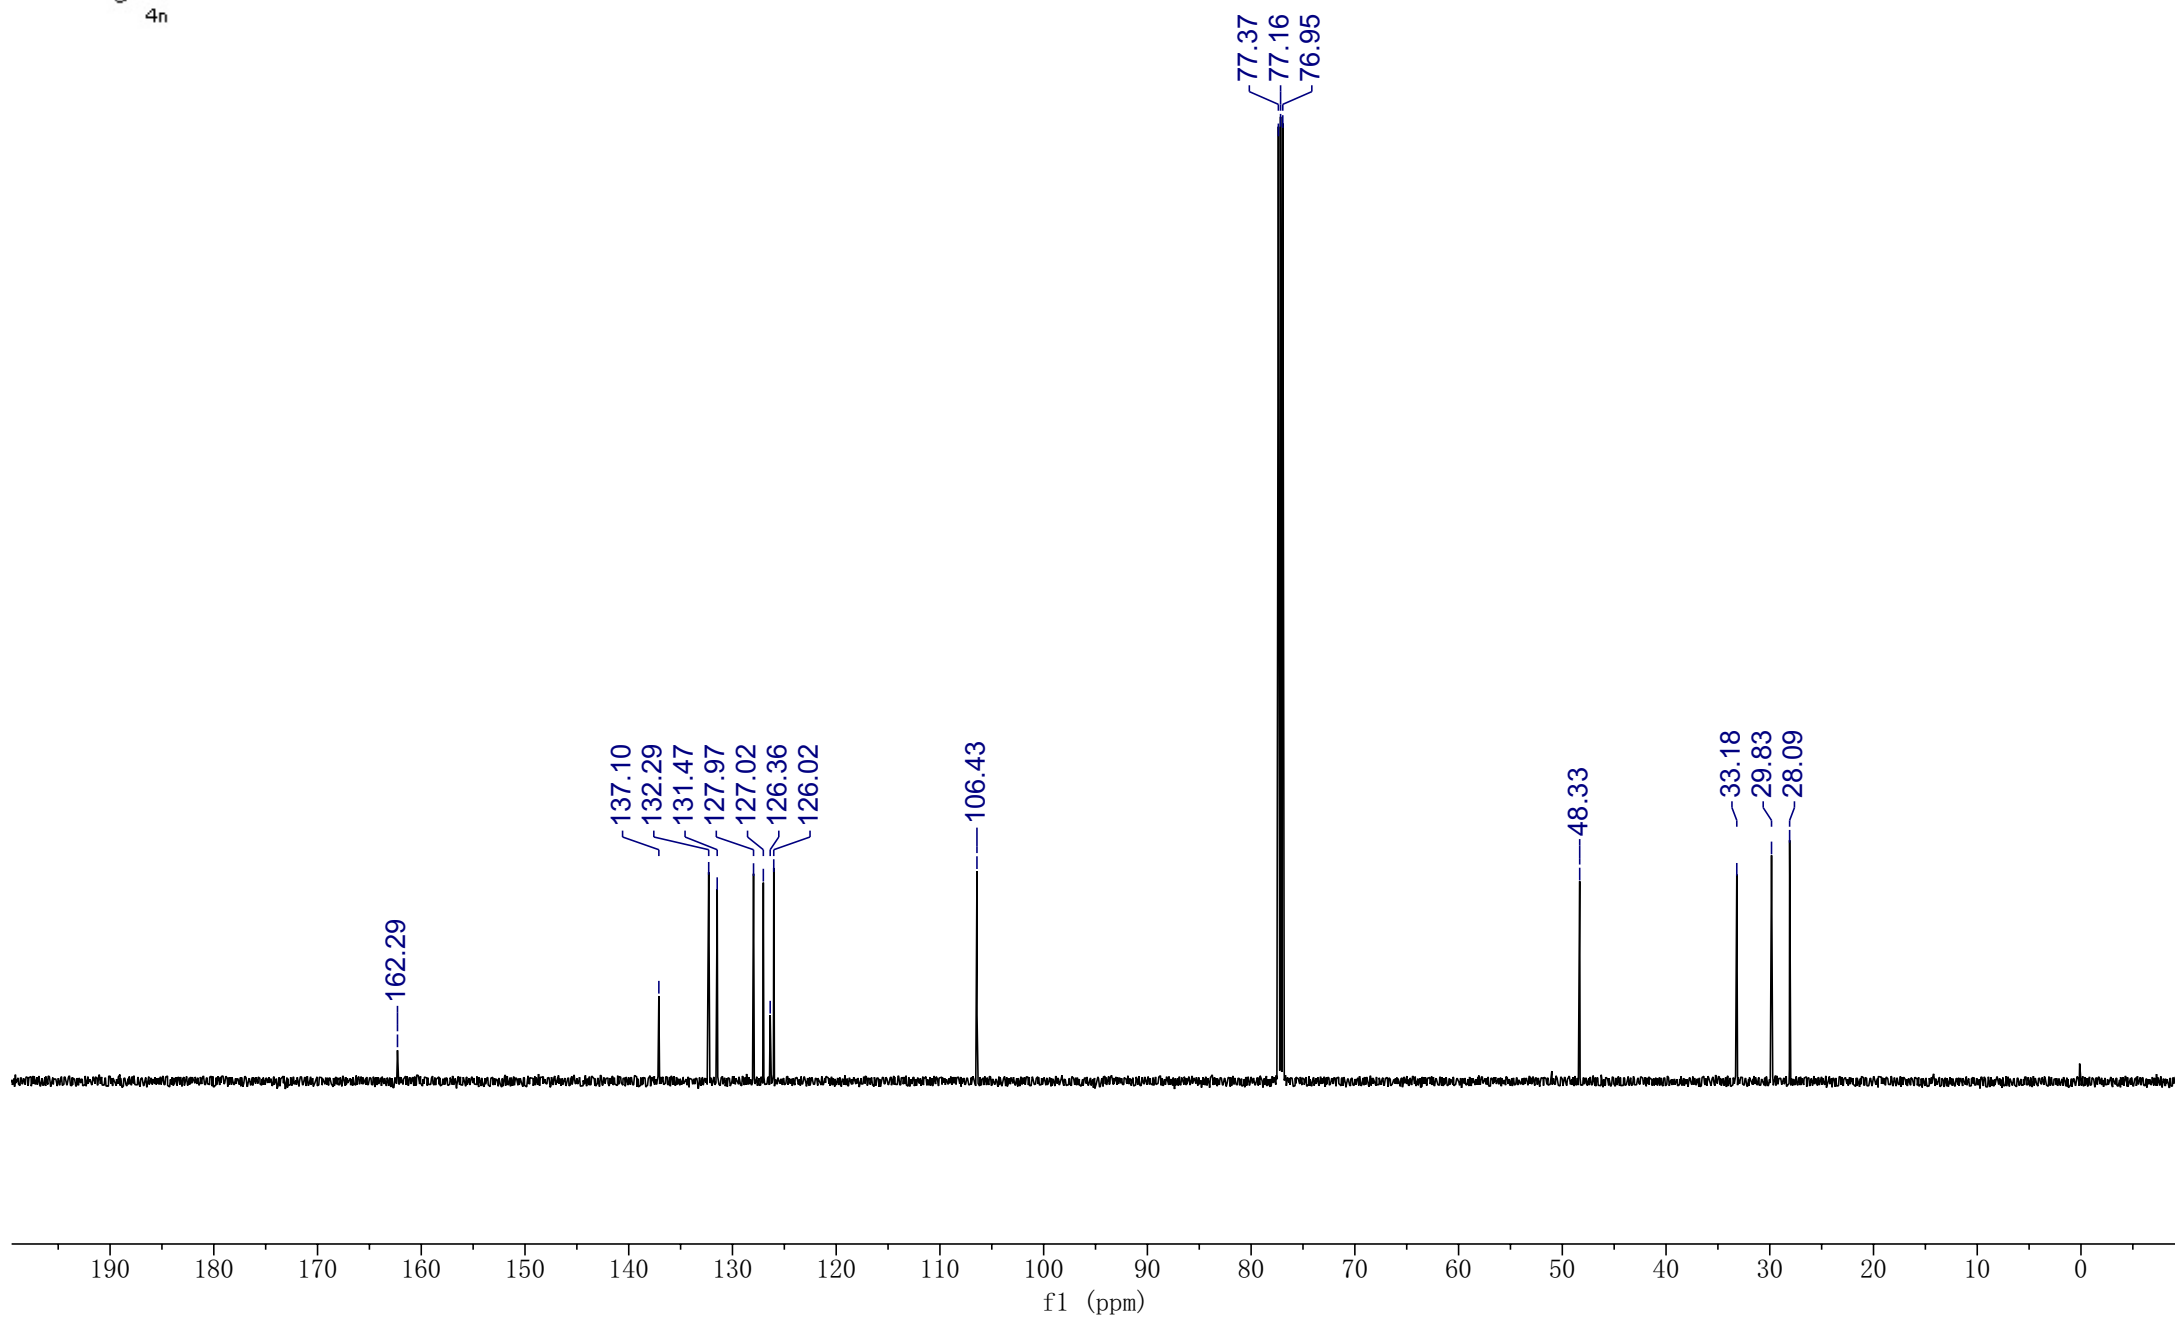

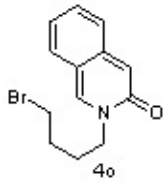

400 MHz, CDCl<sub>3</sub>

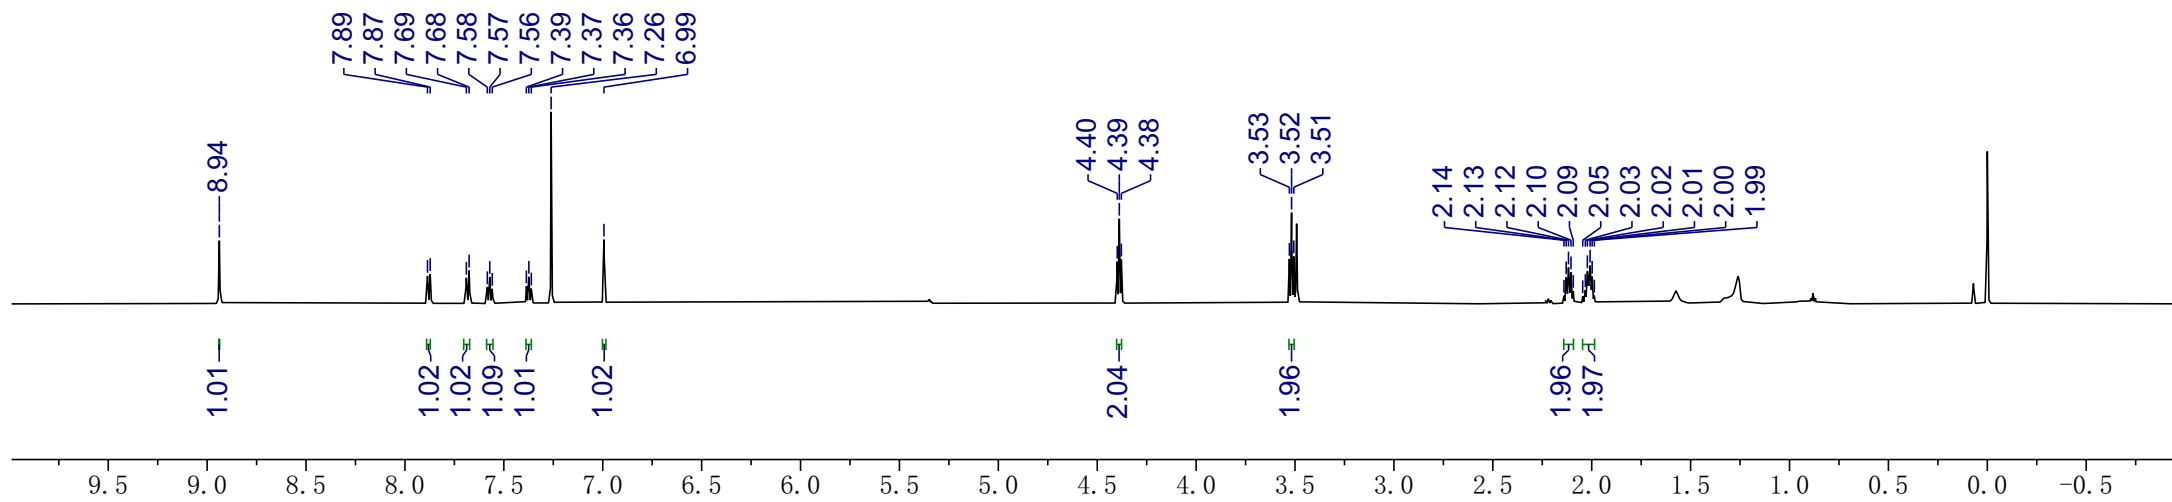



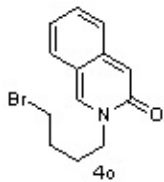

400 MHz, CDCl<sub>3</sub>

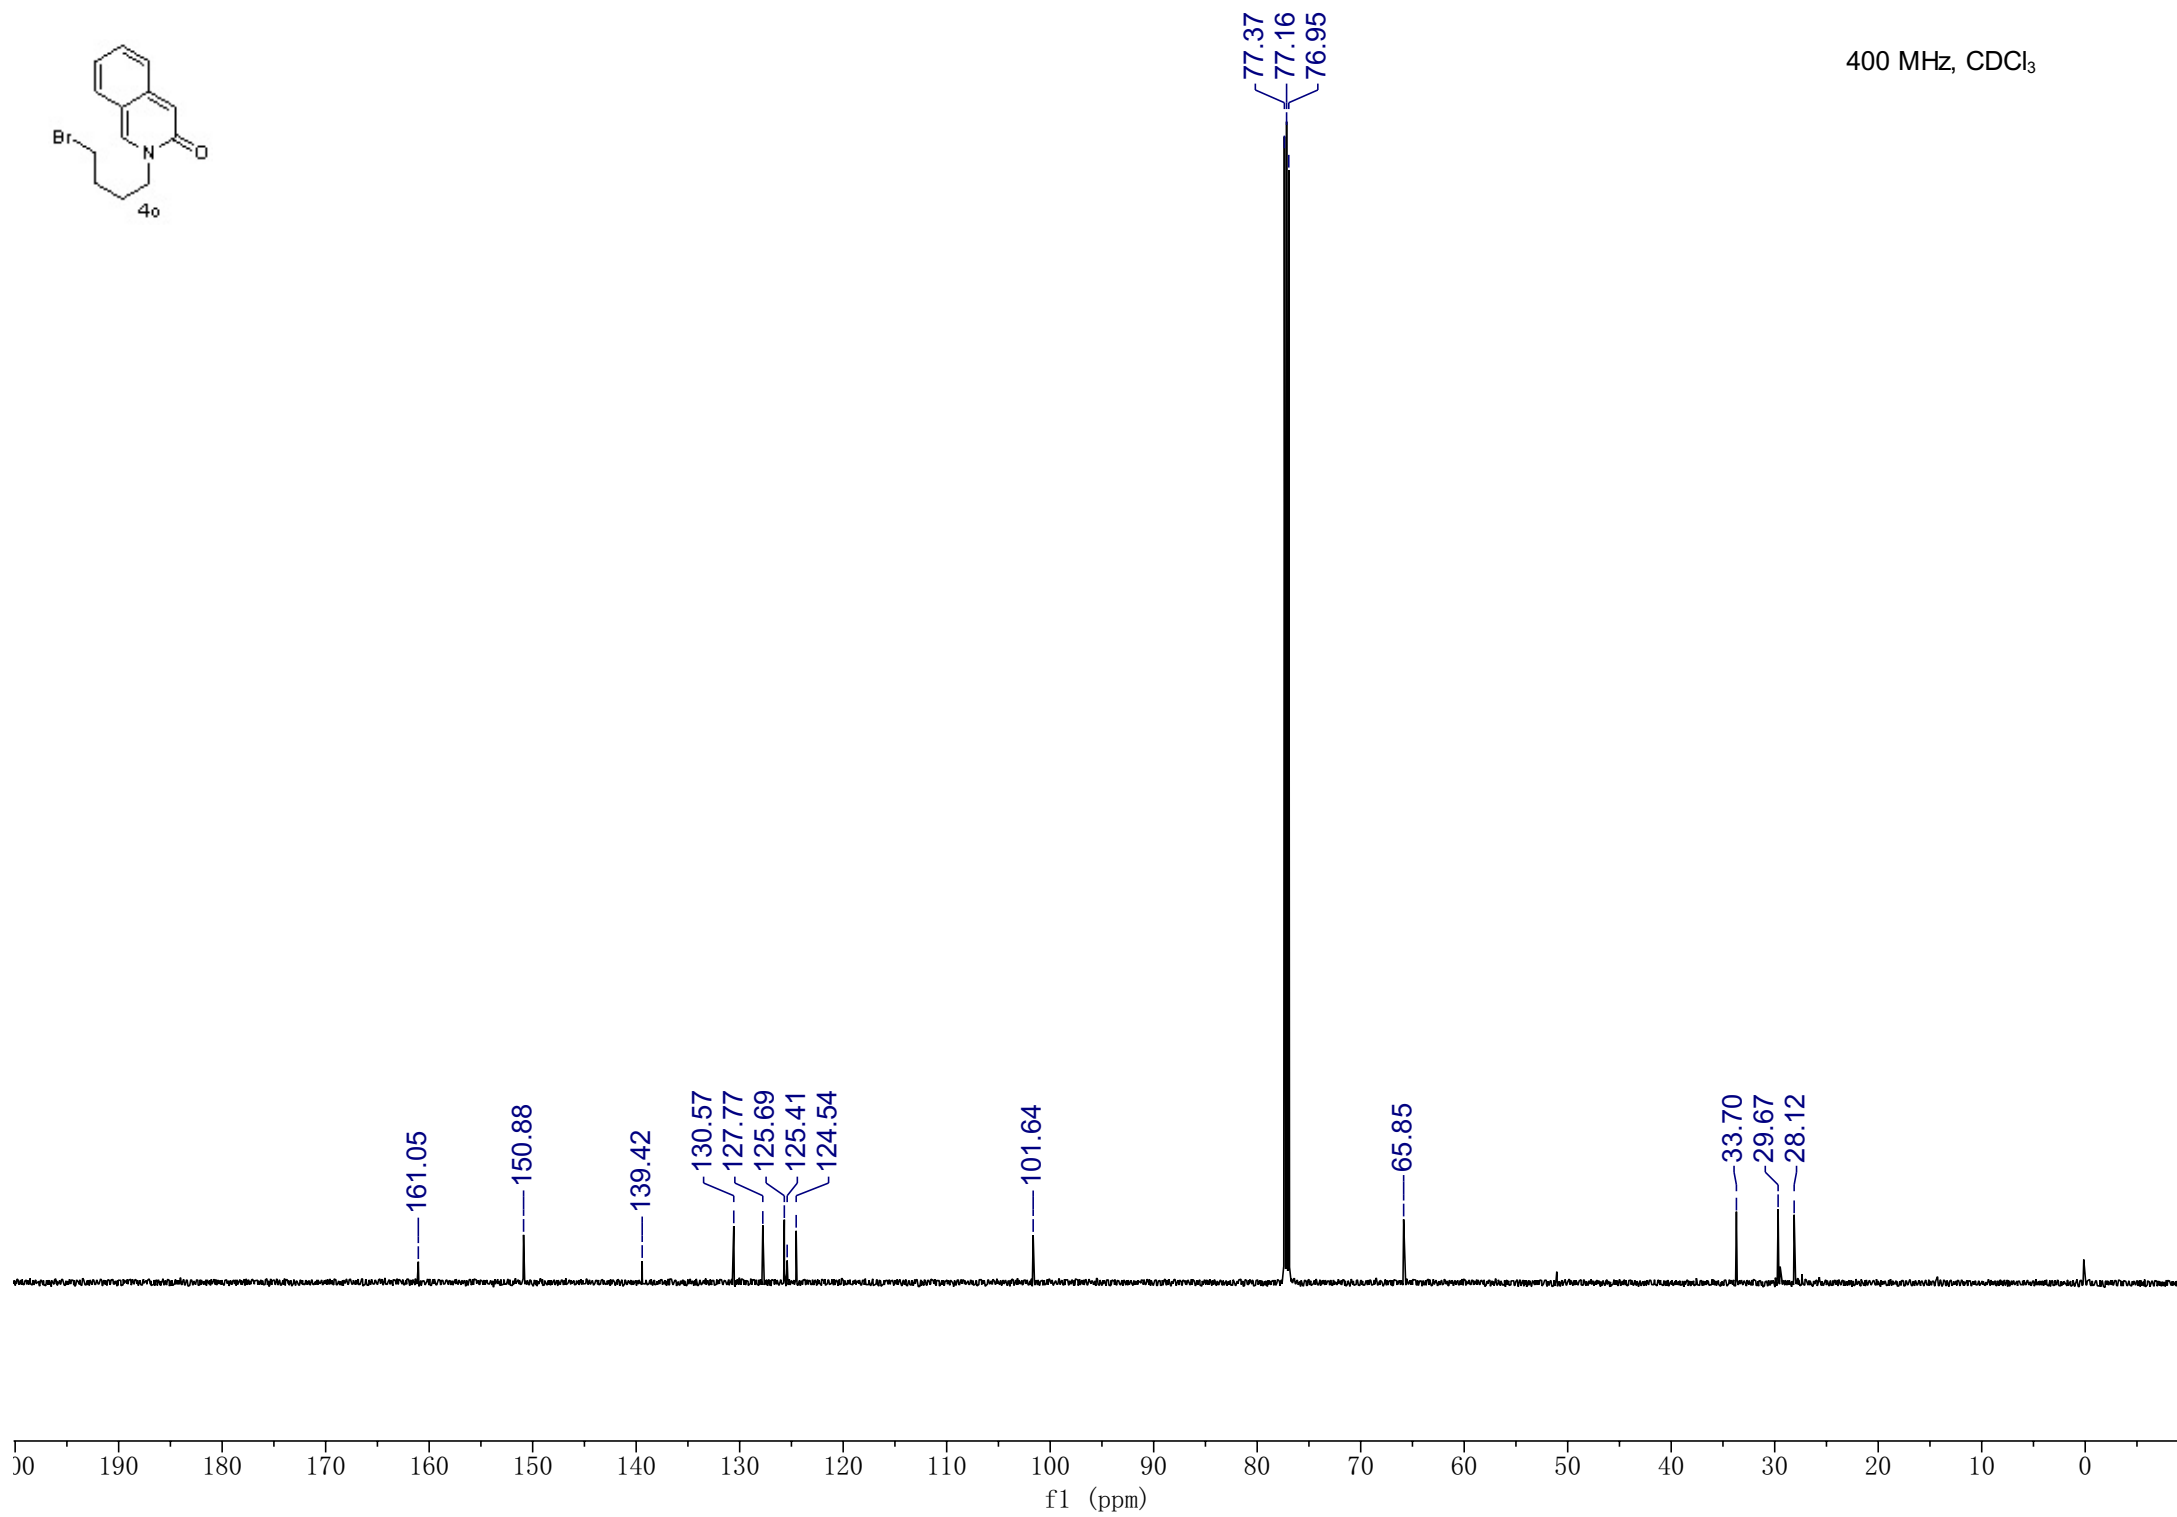

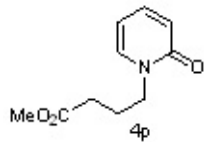

400 MHz, CDCl<sub>3</sub>

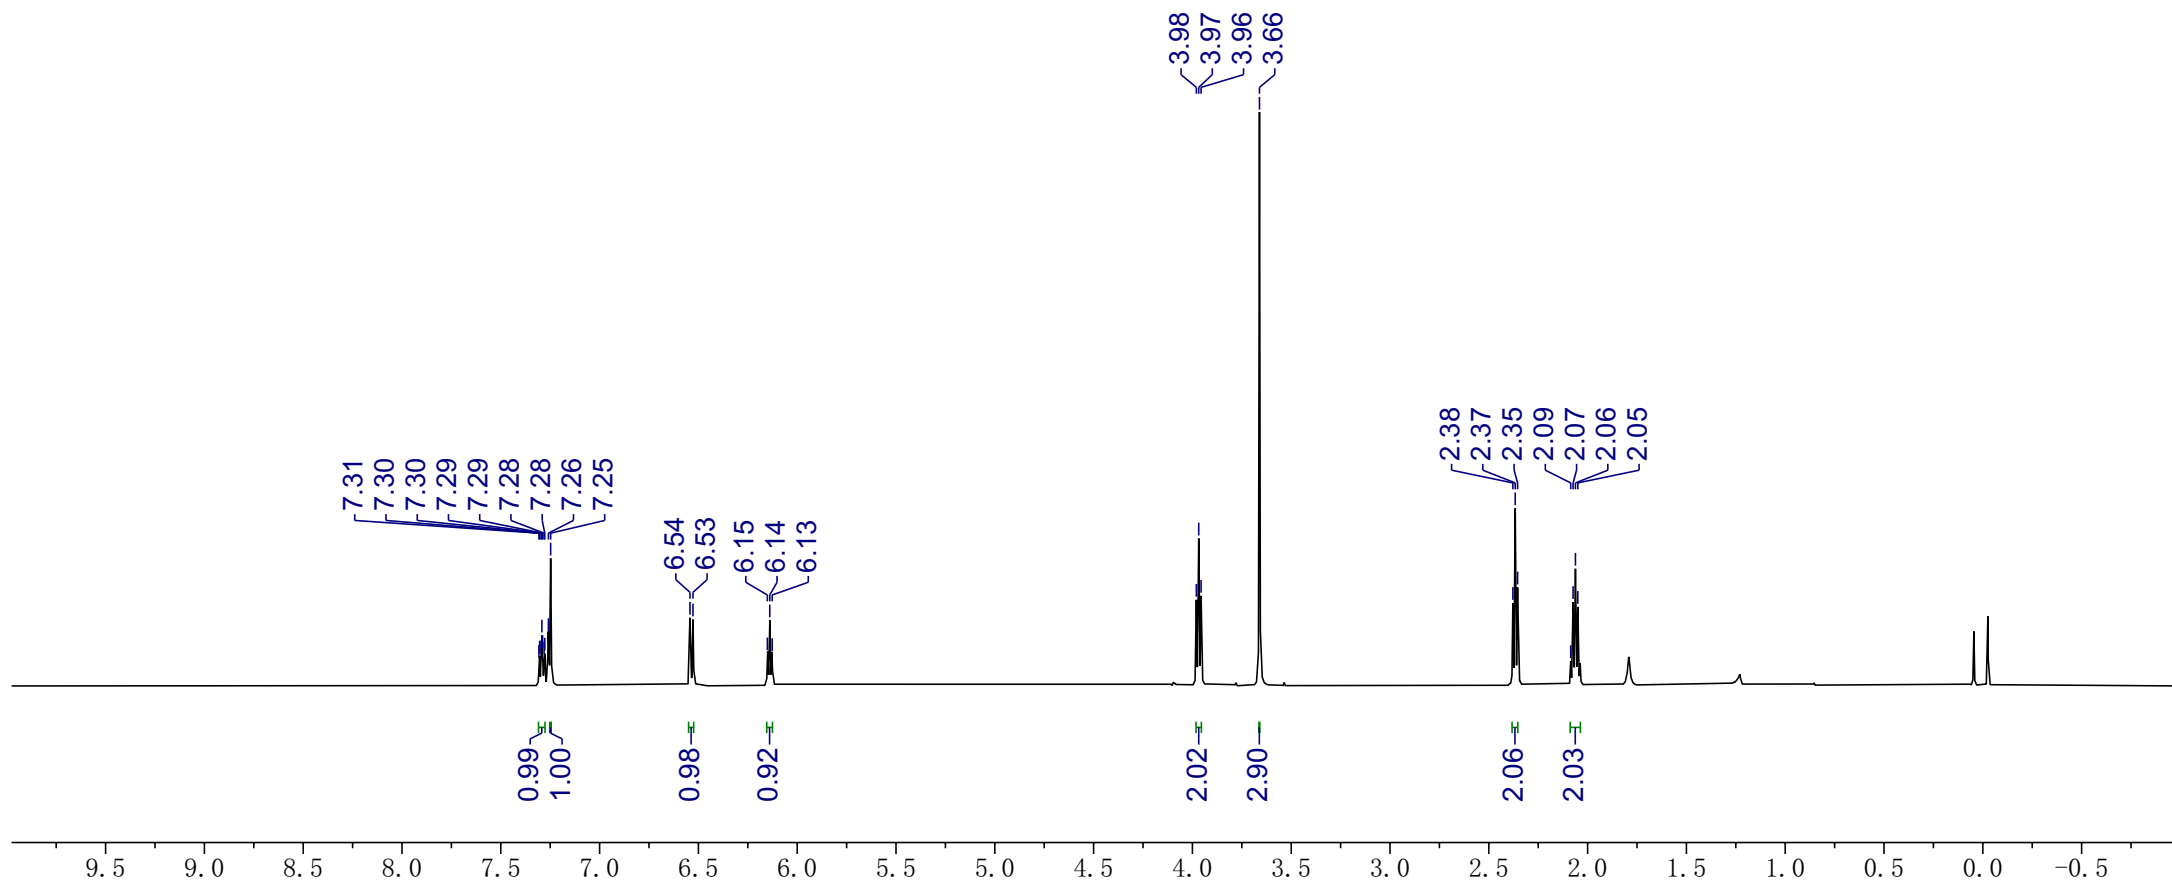



400 MHz, CDCl<sub>3</sub>

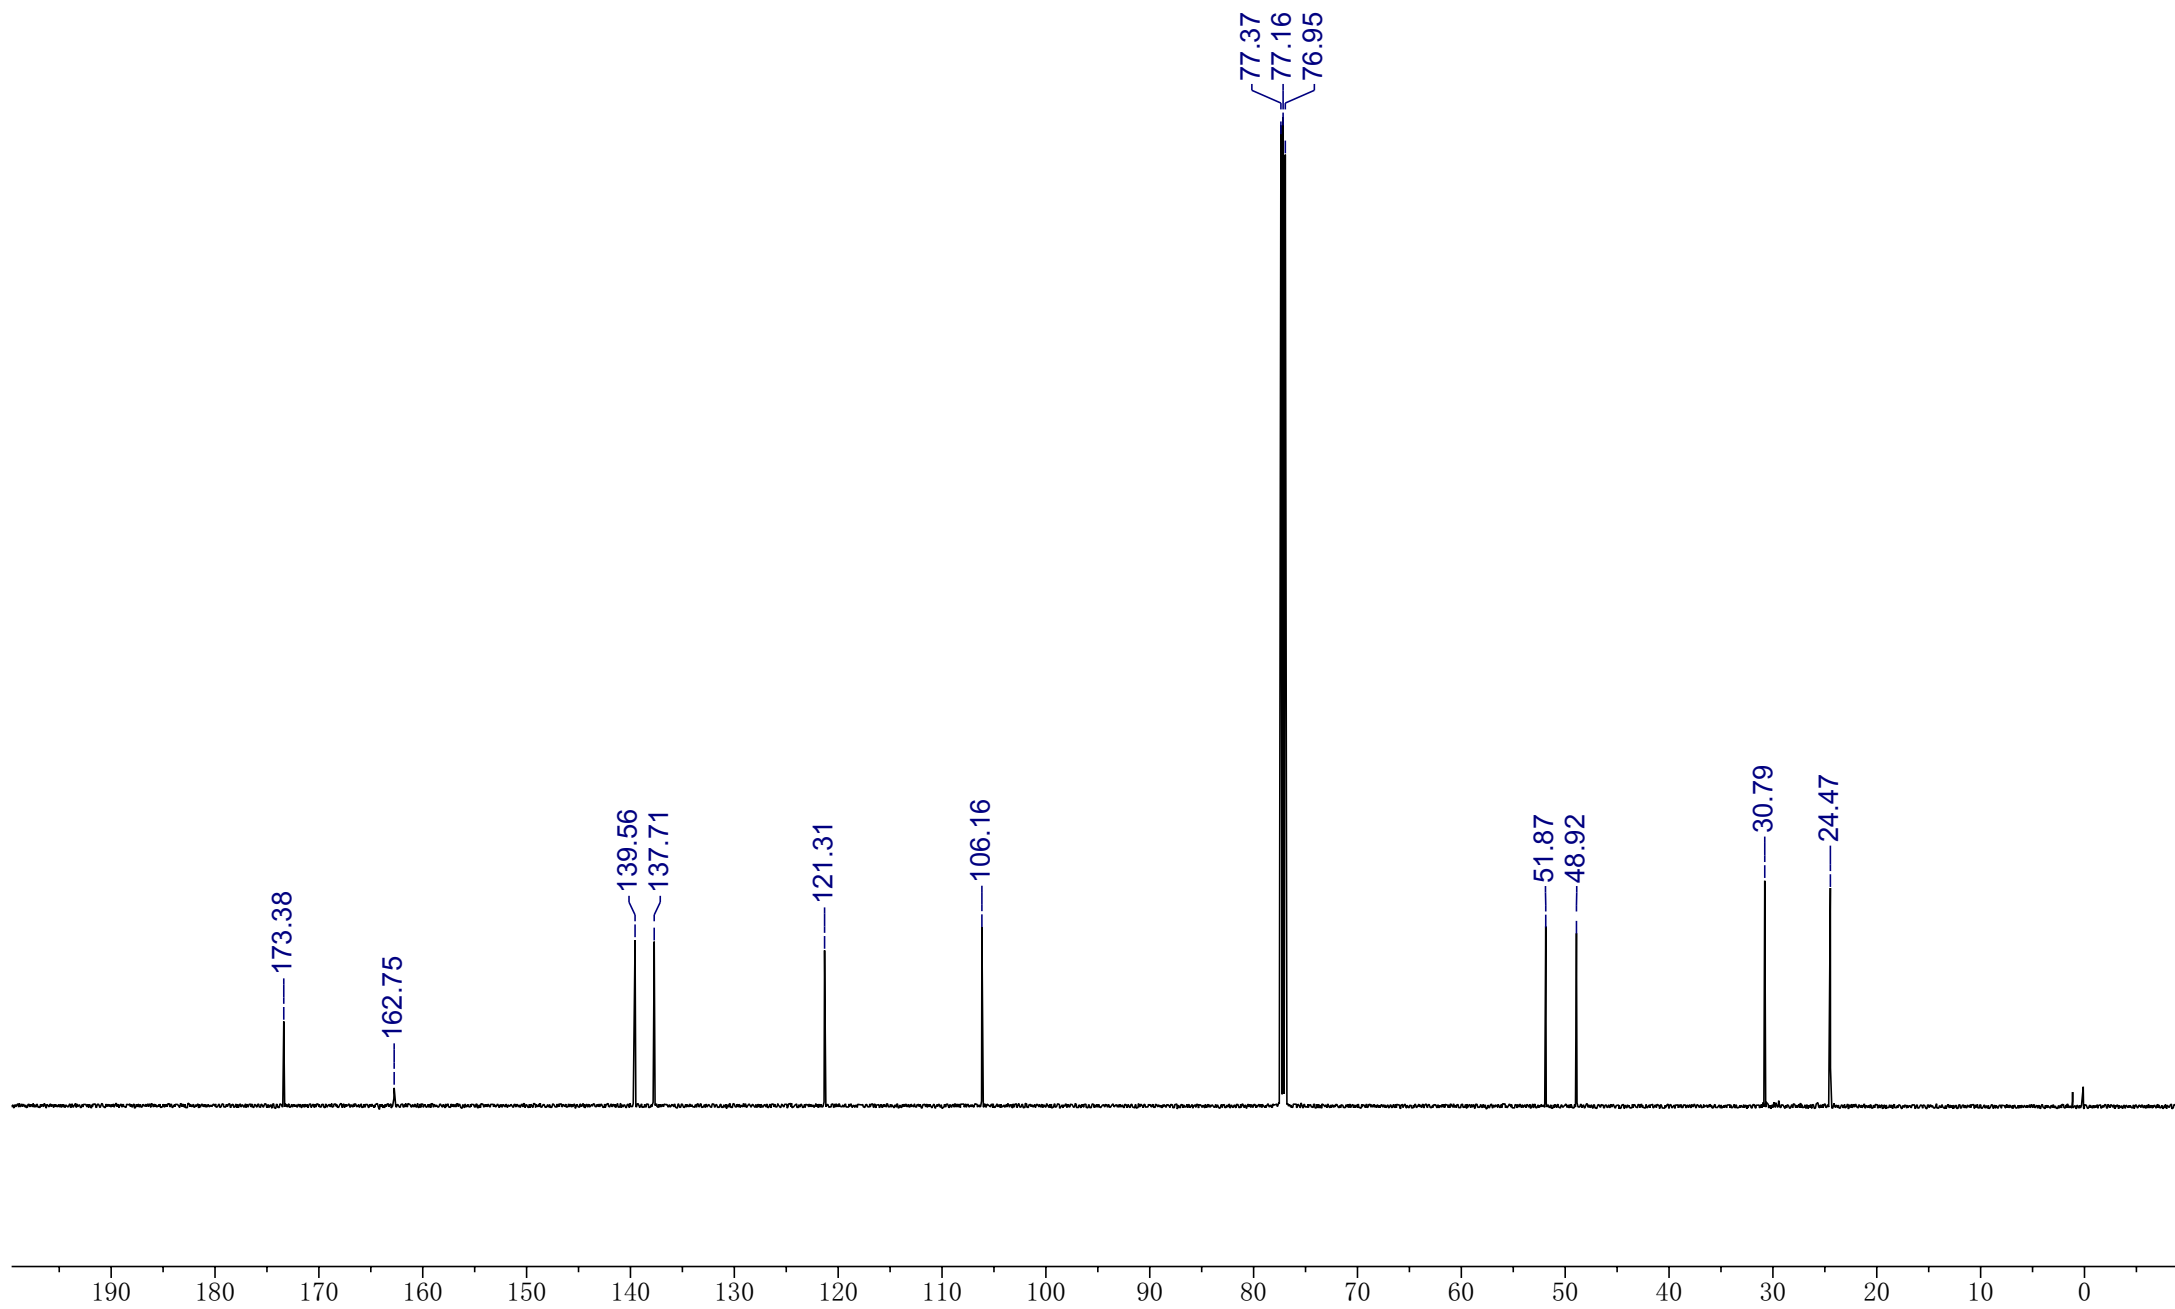

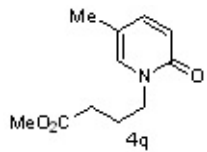

400 MHz, CDCl<sub>3</sub>

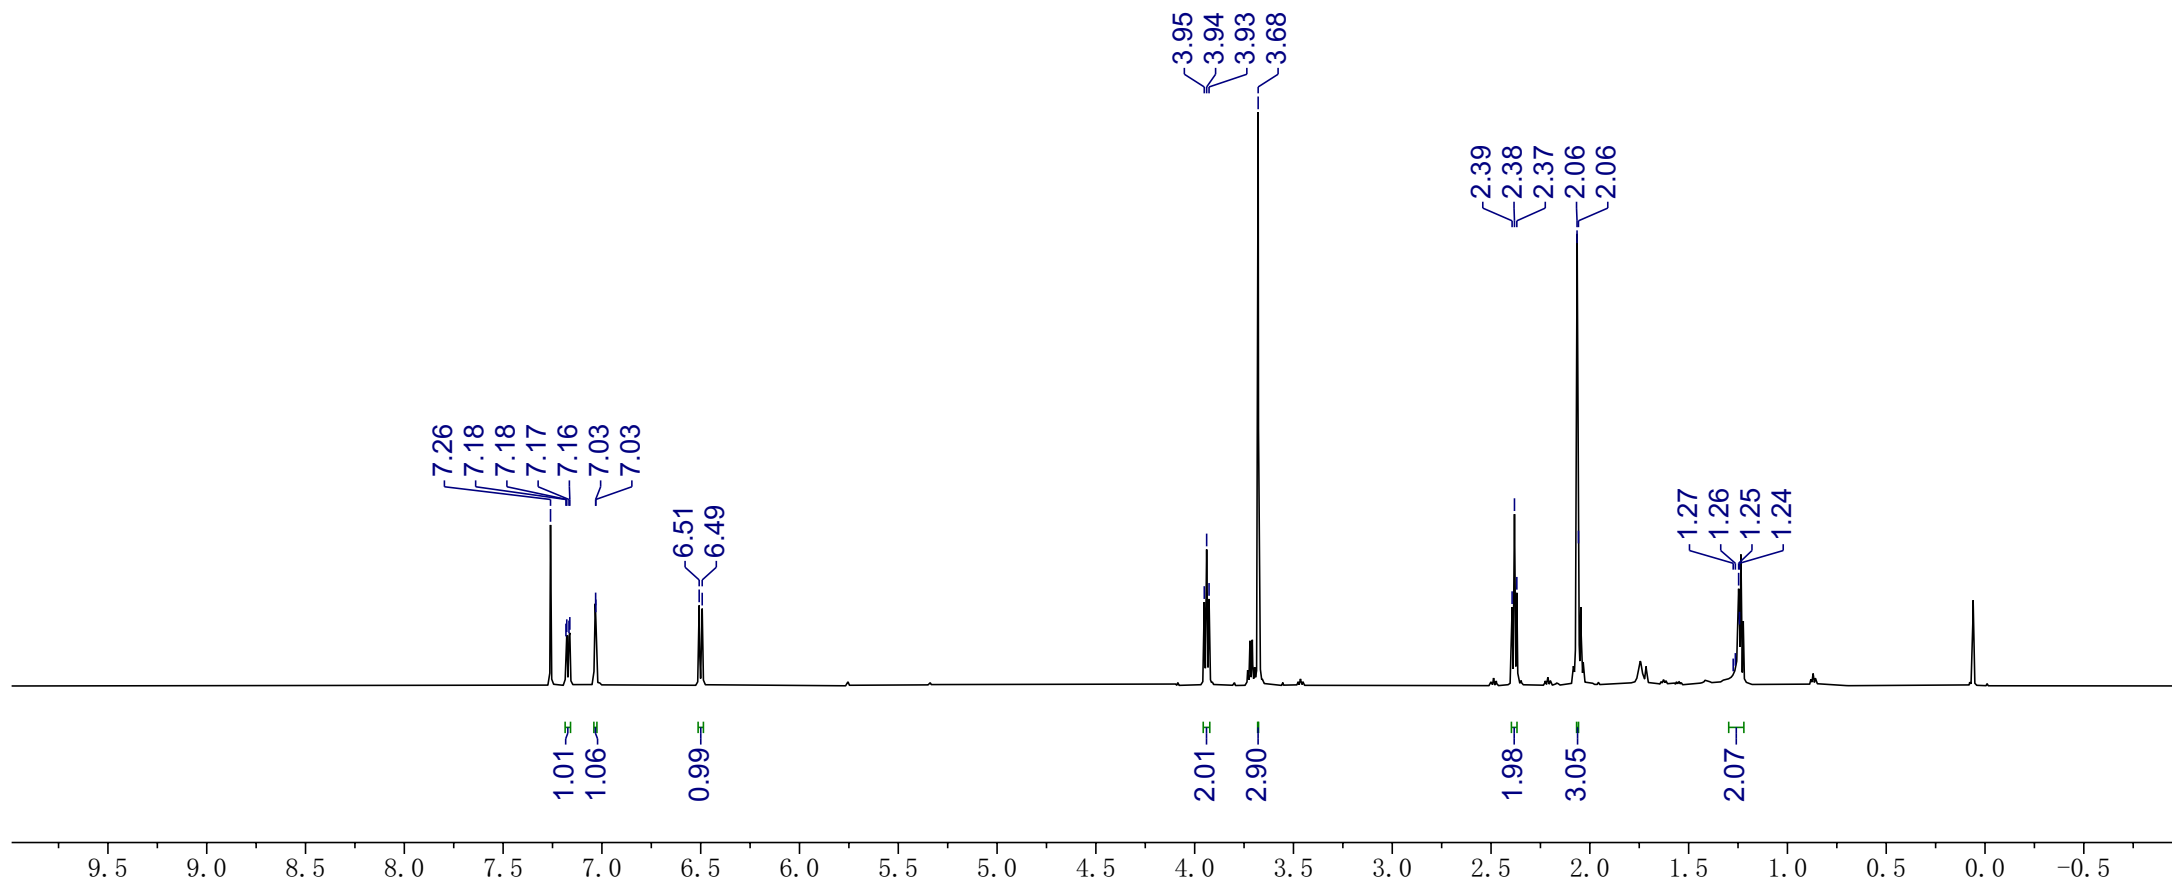

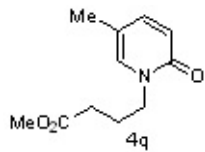

400 MHz, CDCl<sub>3</sub>

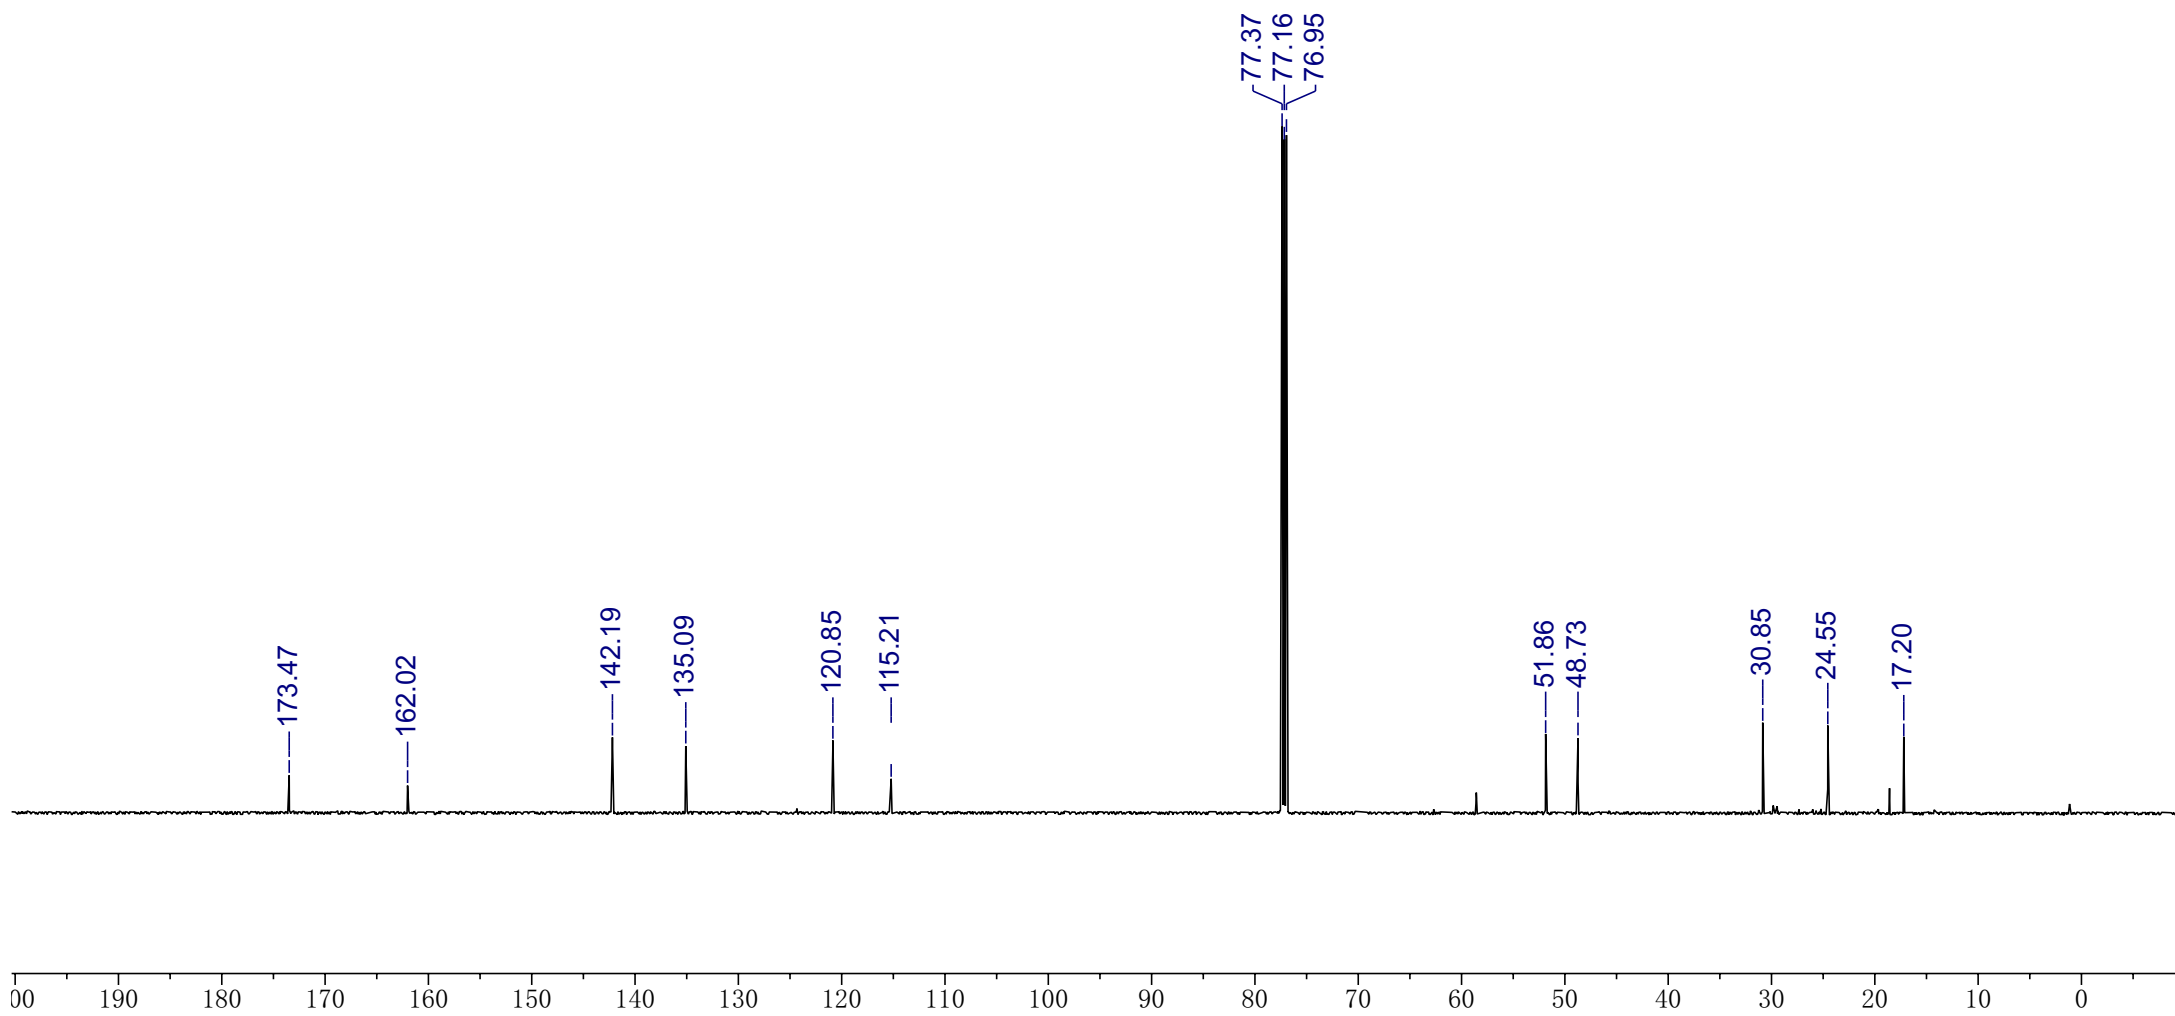

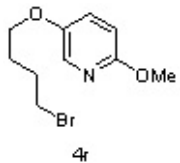

400 MHz, CDCl<sub>3</sub>

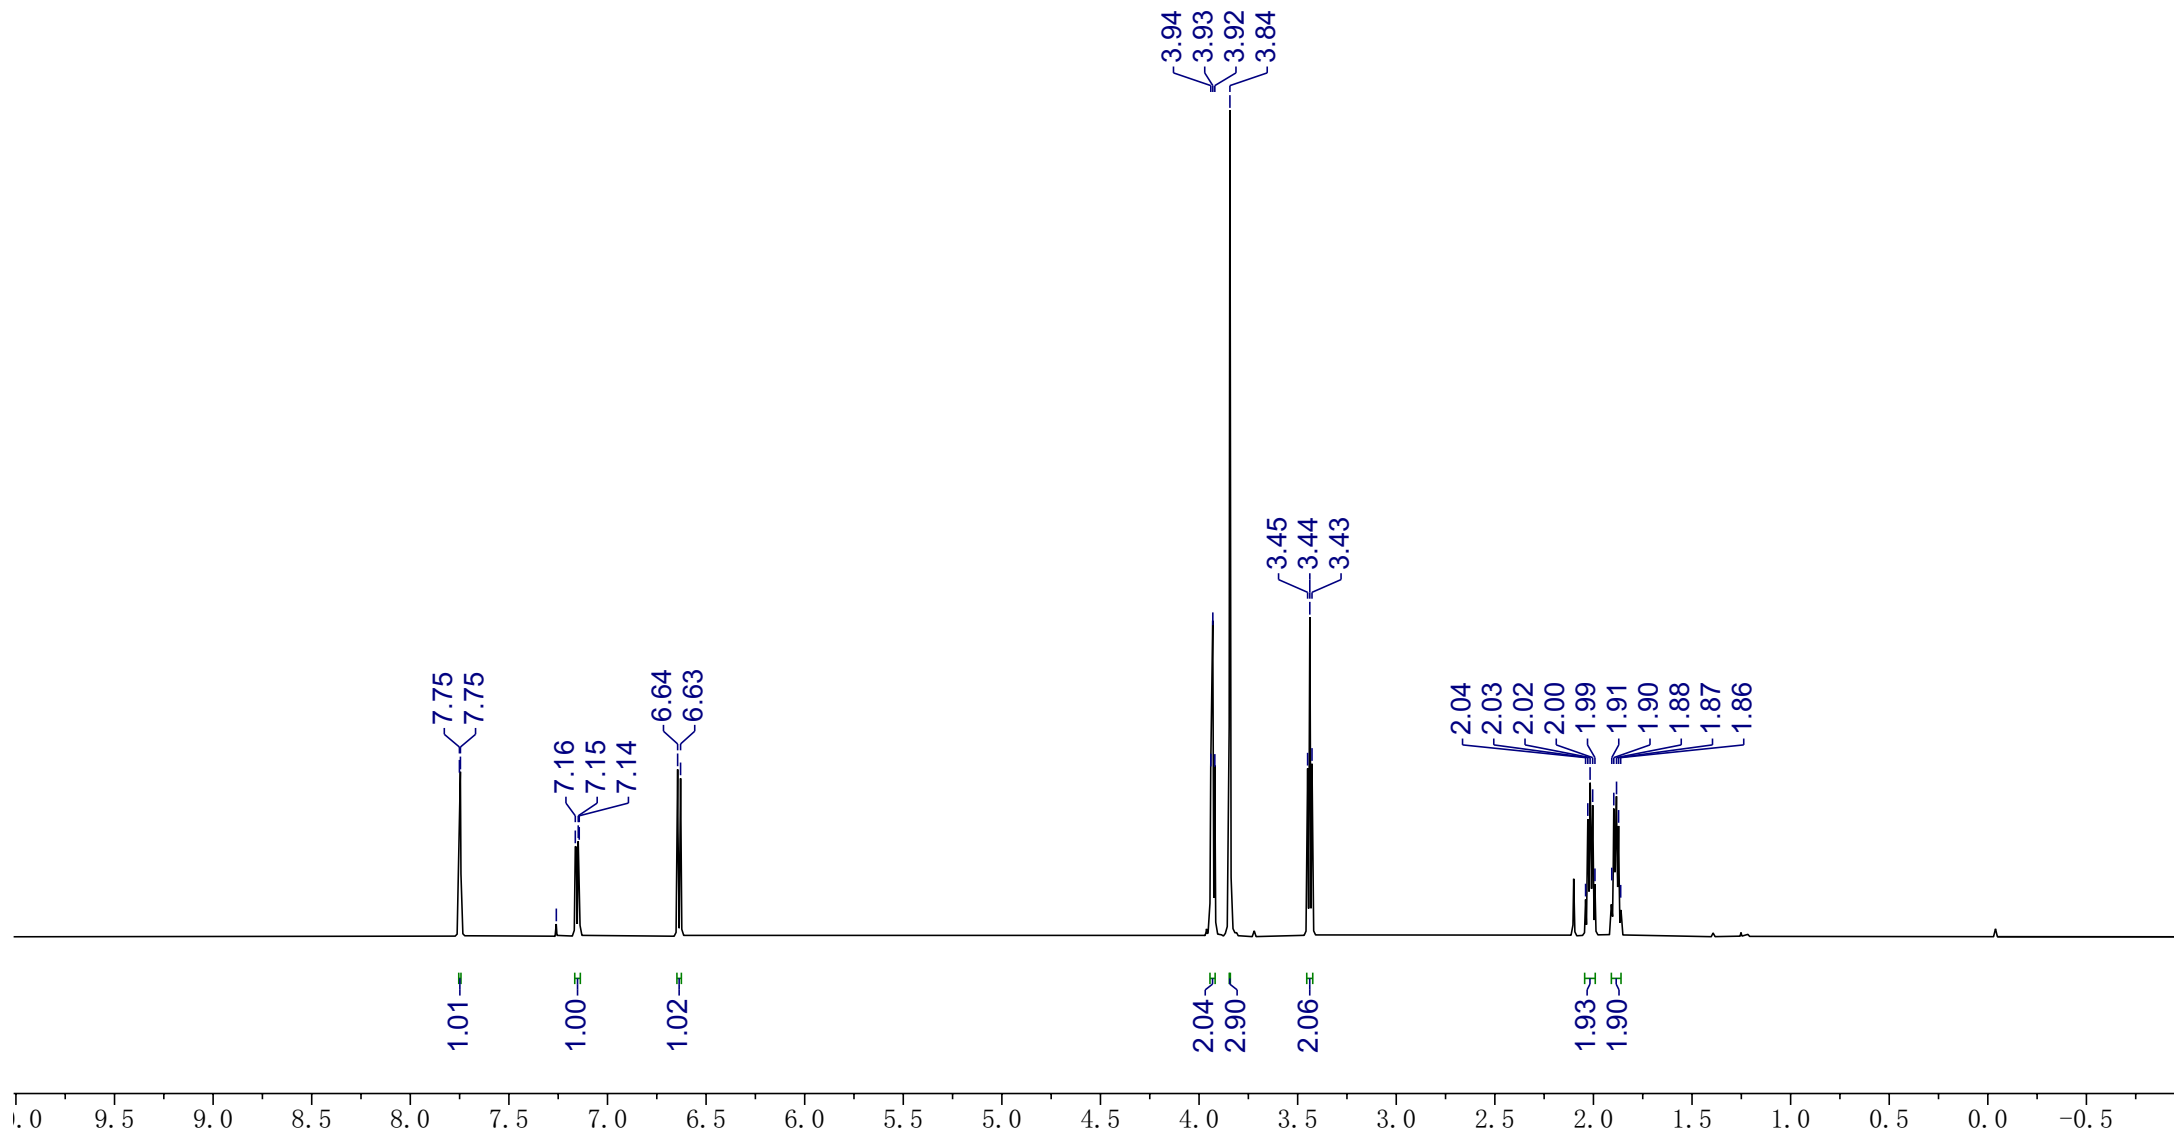

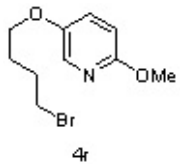

400 MHz, CDCl<sub>3</sub>

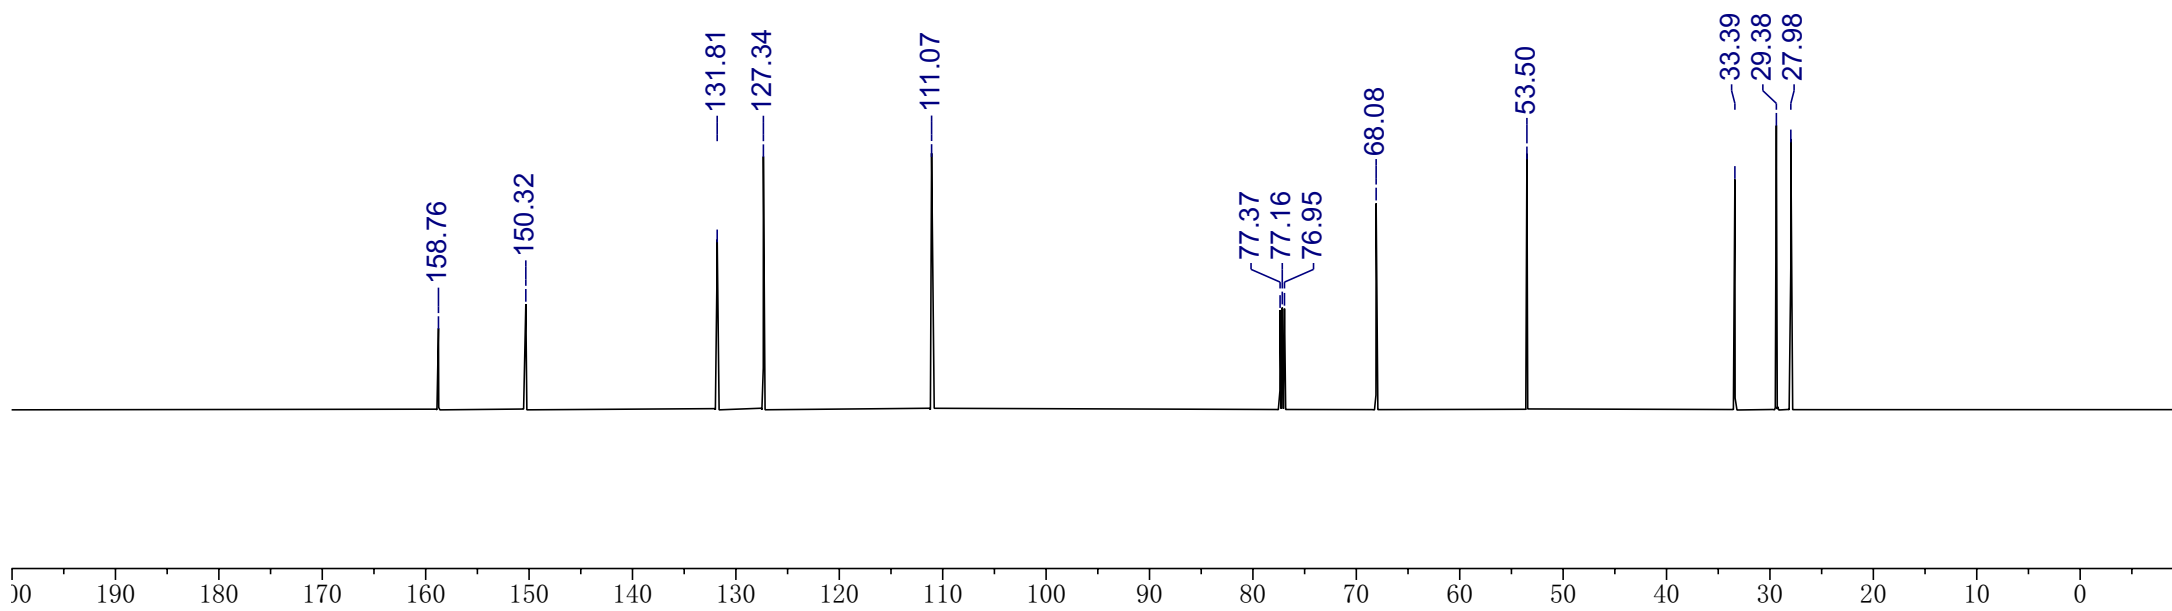

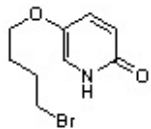

4s

400 MHz, CDCl<sub>3</sub>

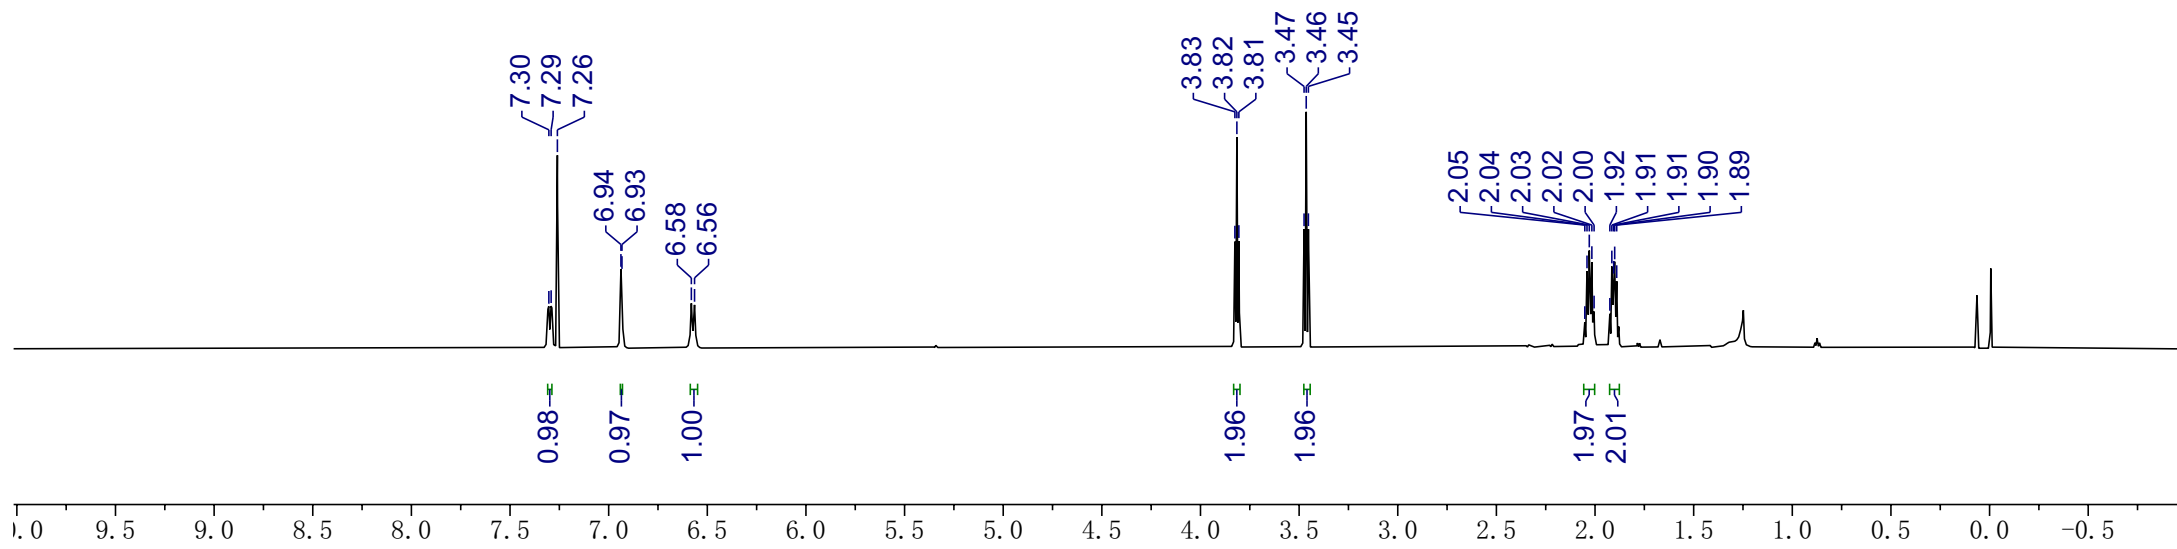





4s

400 MHz, CDCl<sub>3</sub>

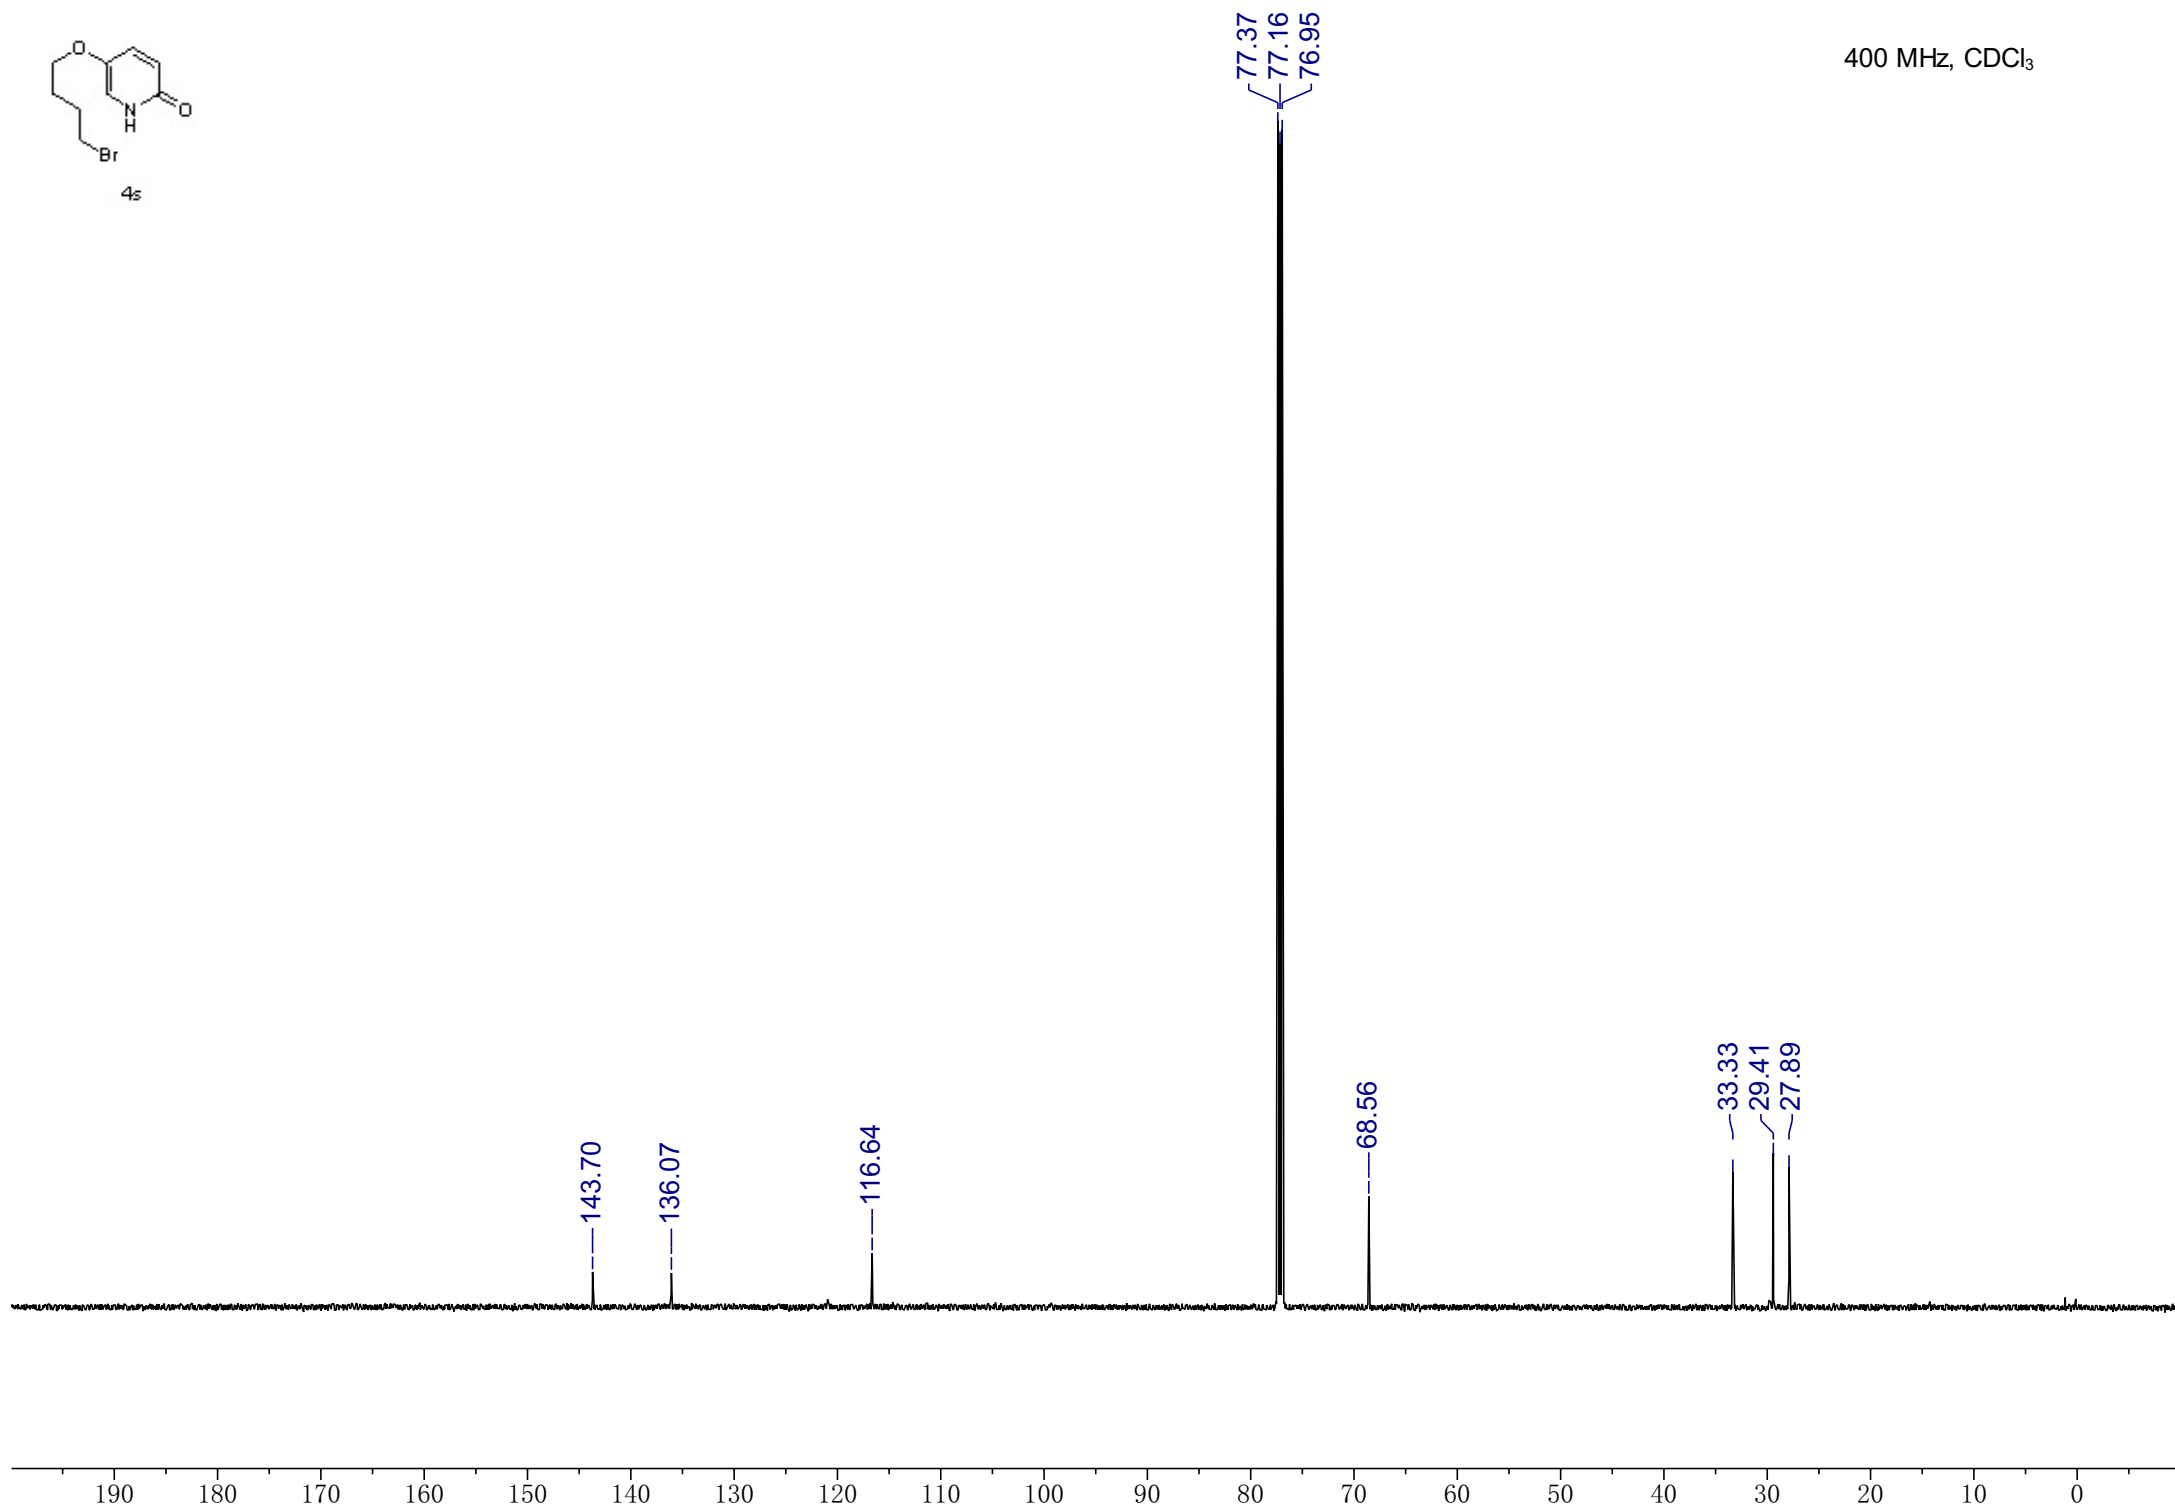

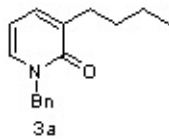

400 MHz, CDCl<sub>3</sub>

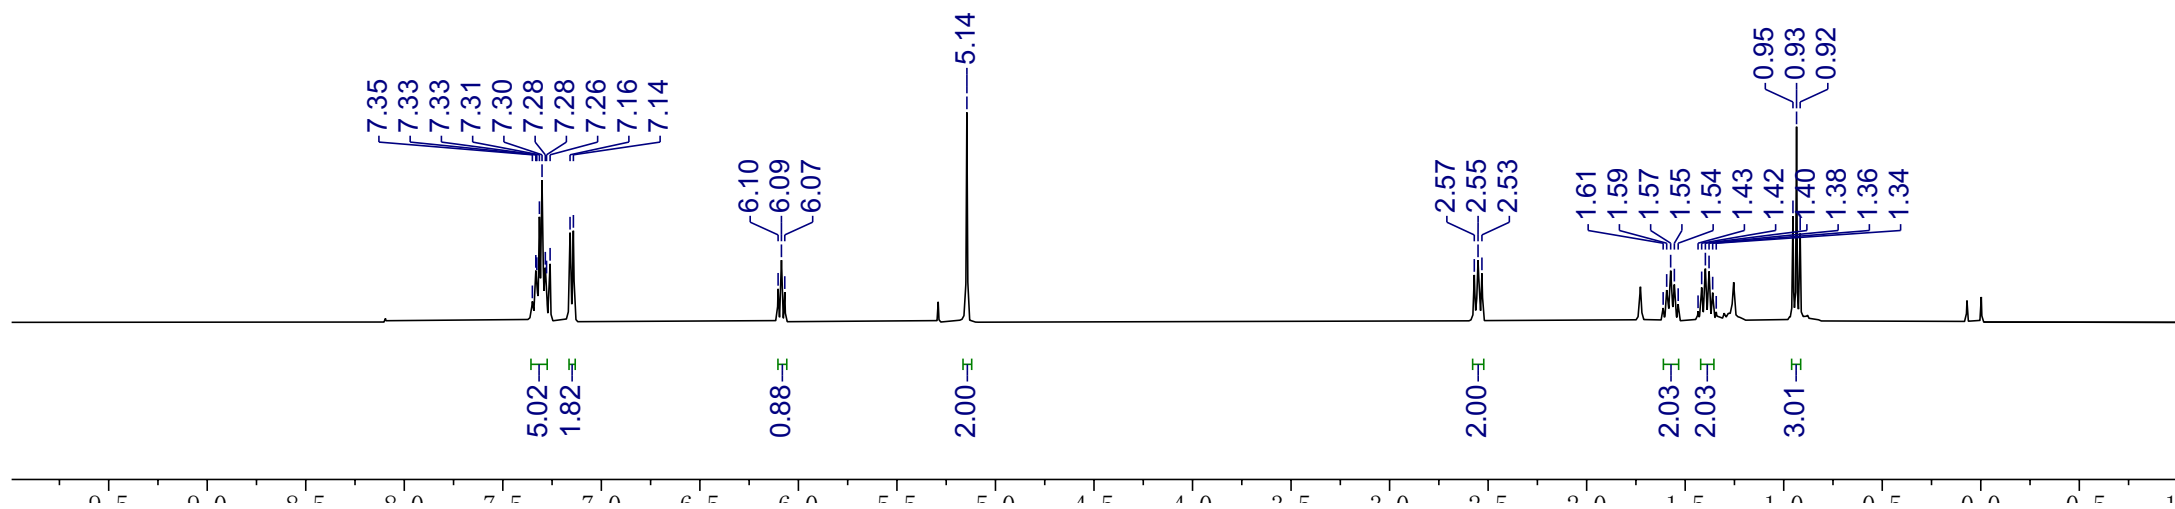

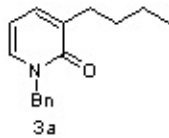

400 MHz, CDCl<sub>3</sub>

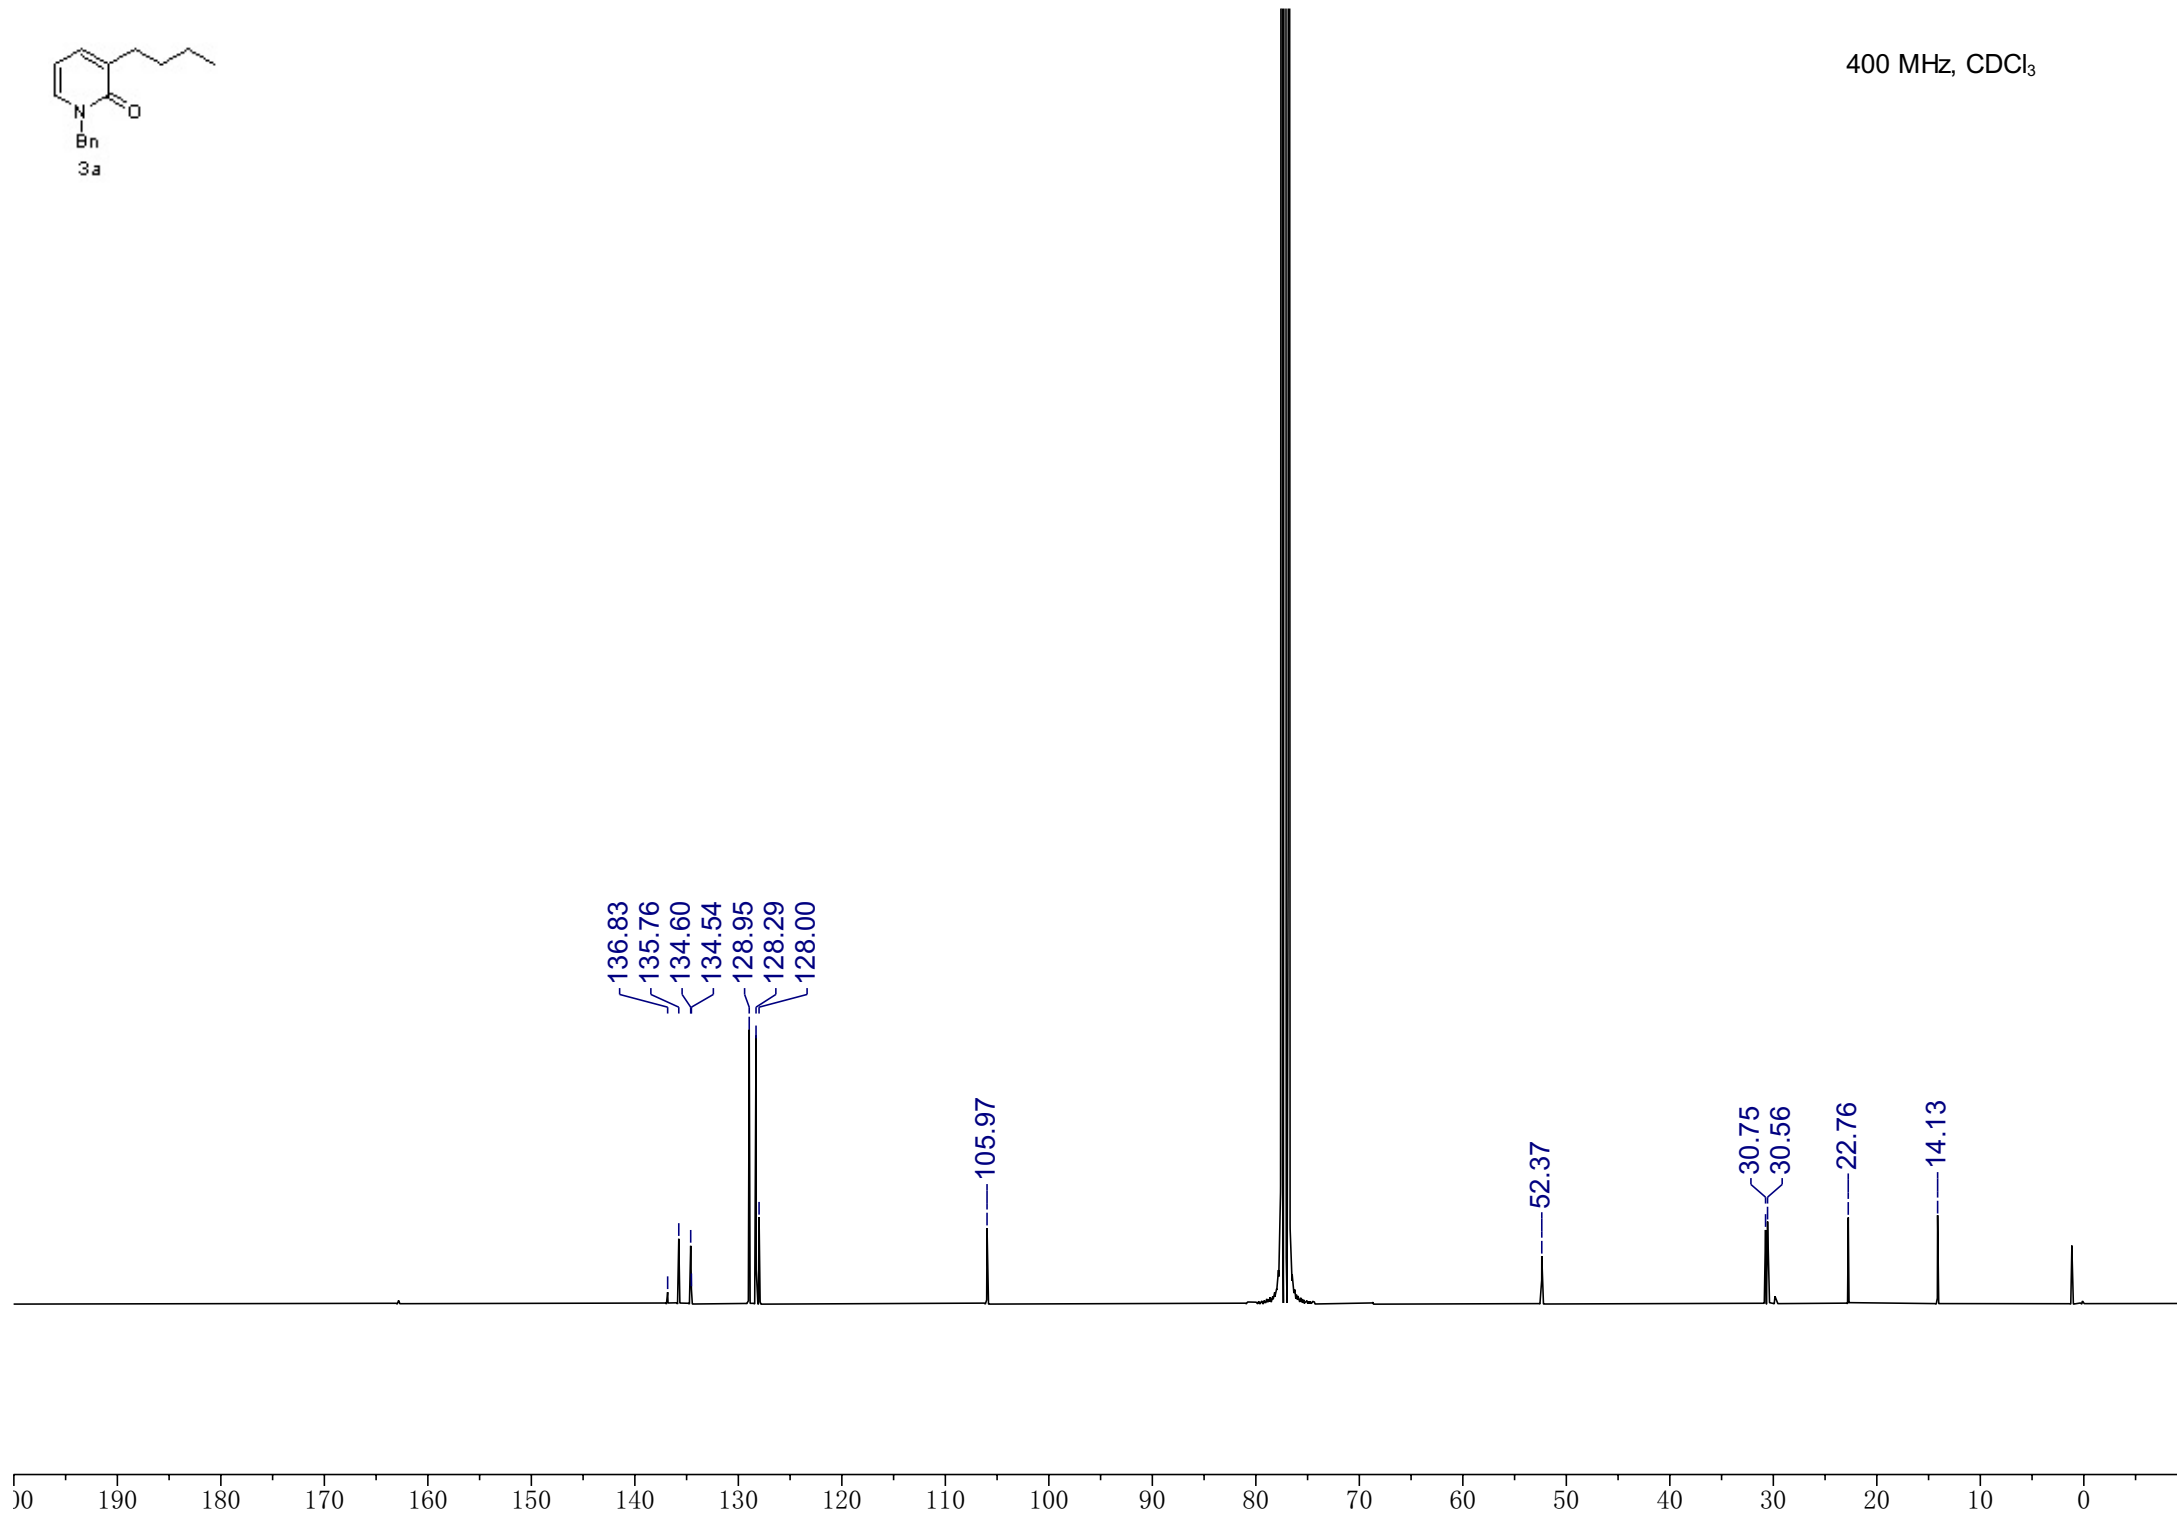

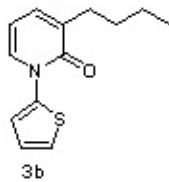

400 MHz, CDCl<sub>3</sub>

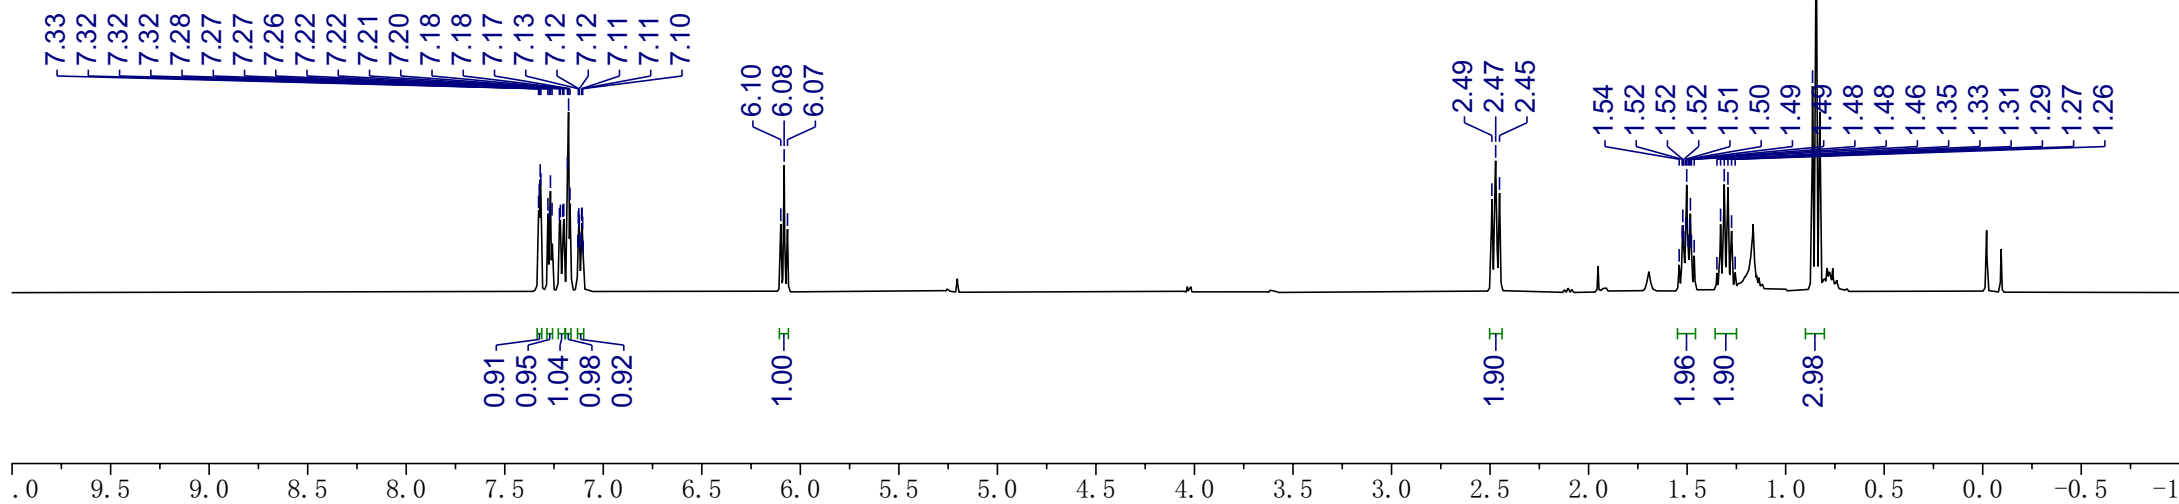

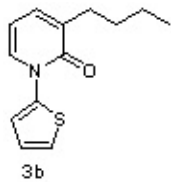

400 MHz, CDCl<sub>3</sub>

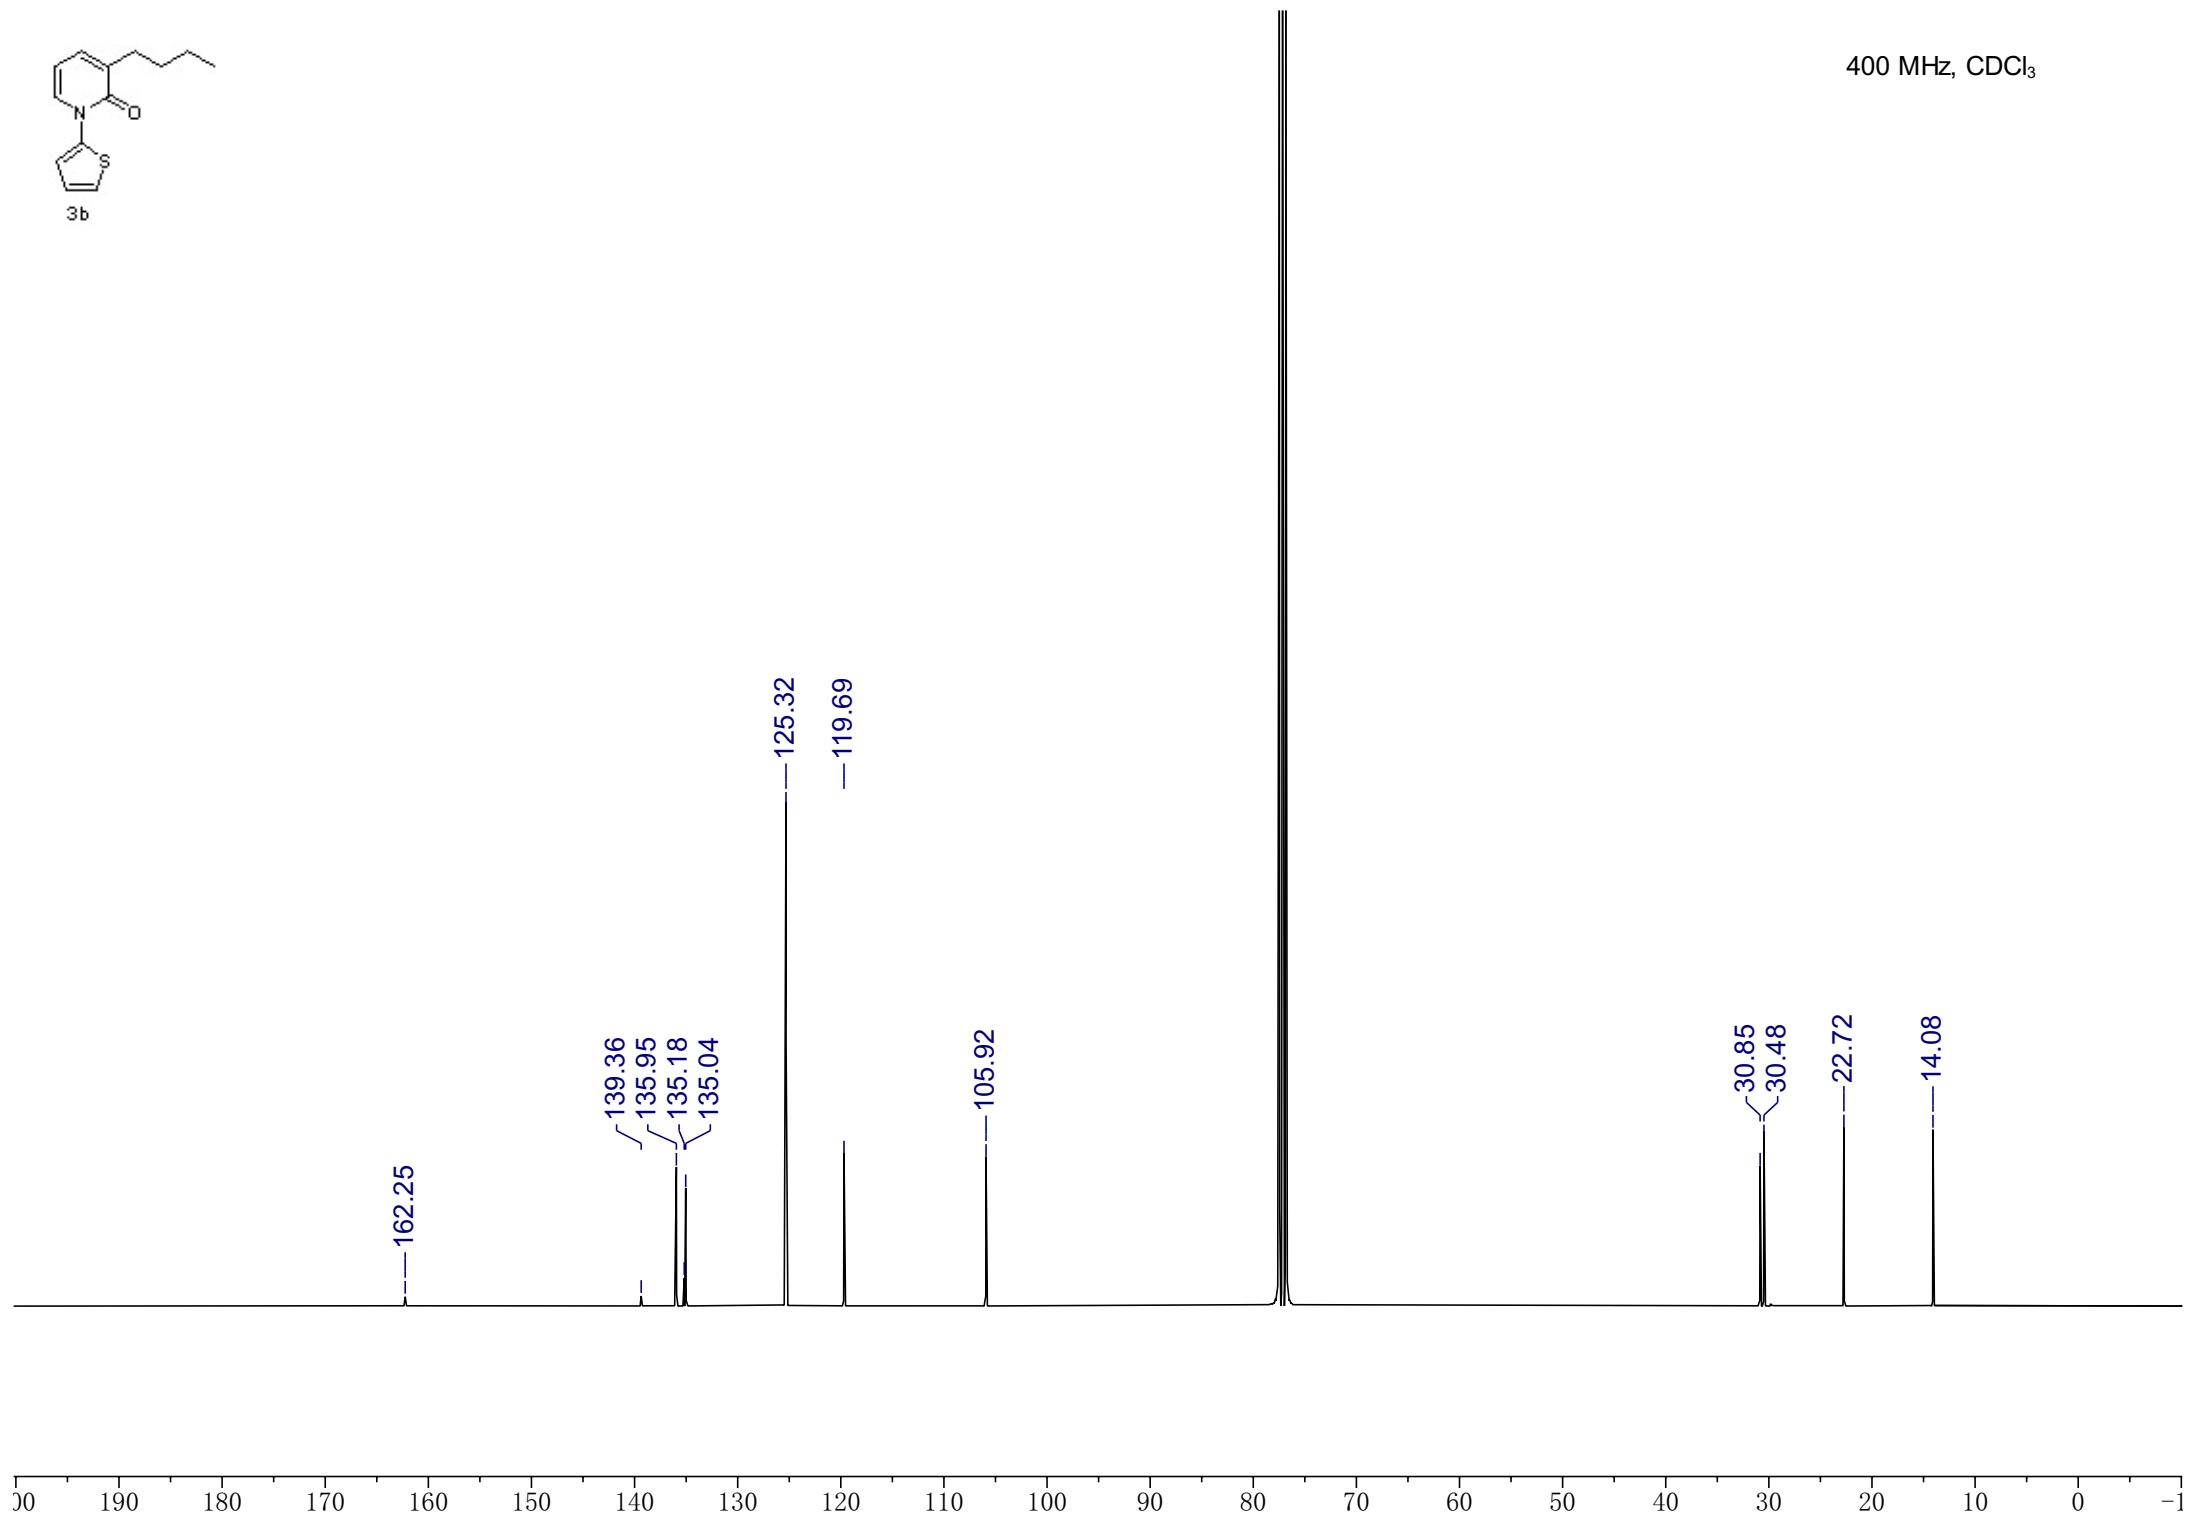

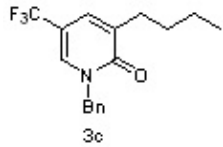

400 MHz, CDCl<sub>3</sub>

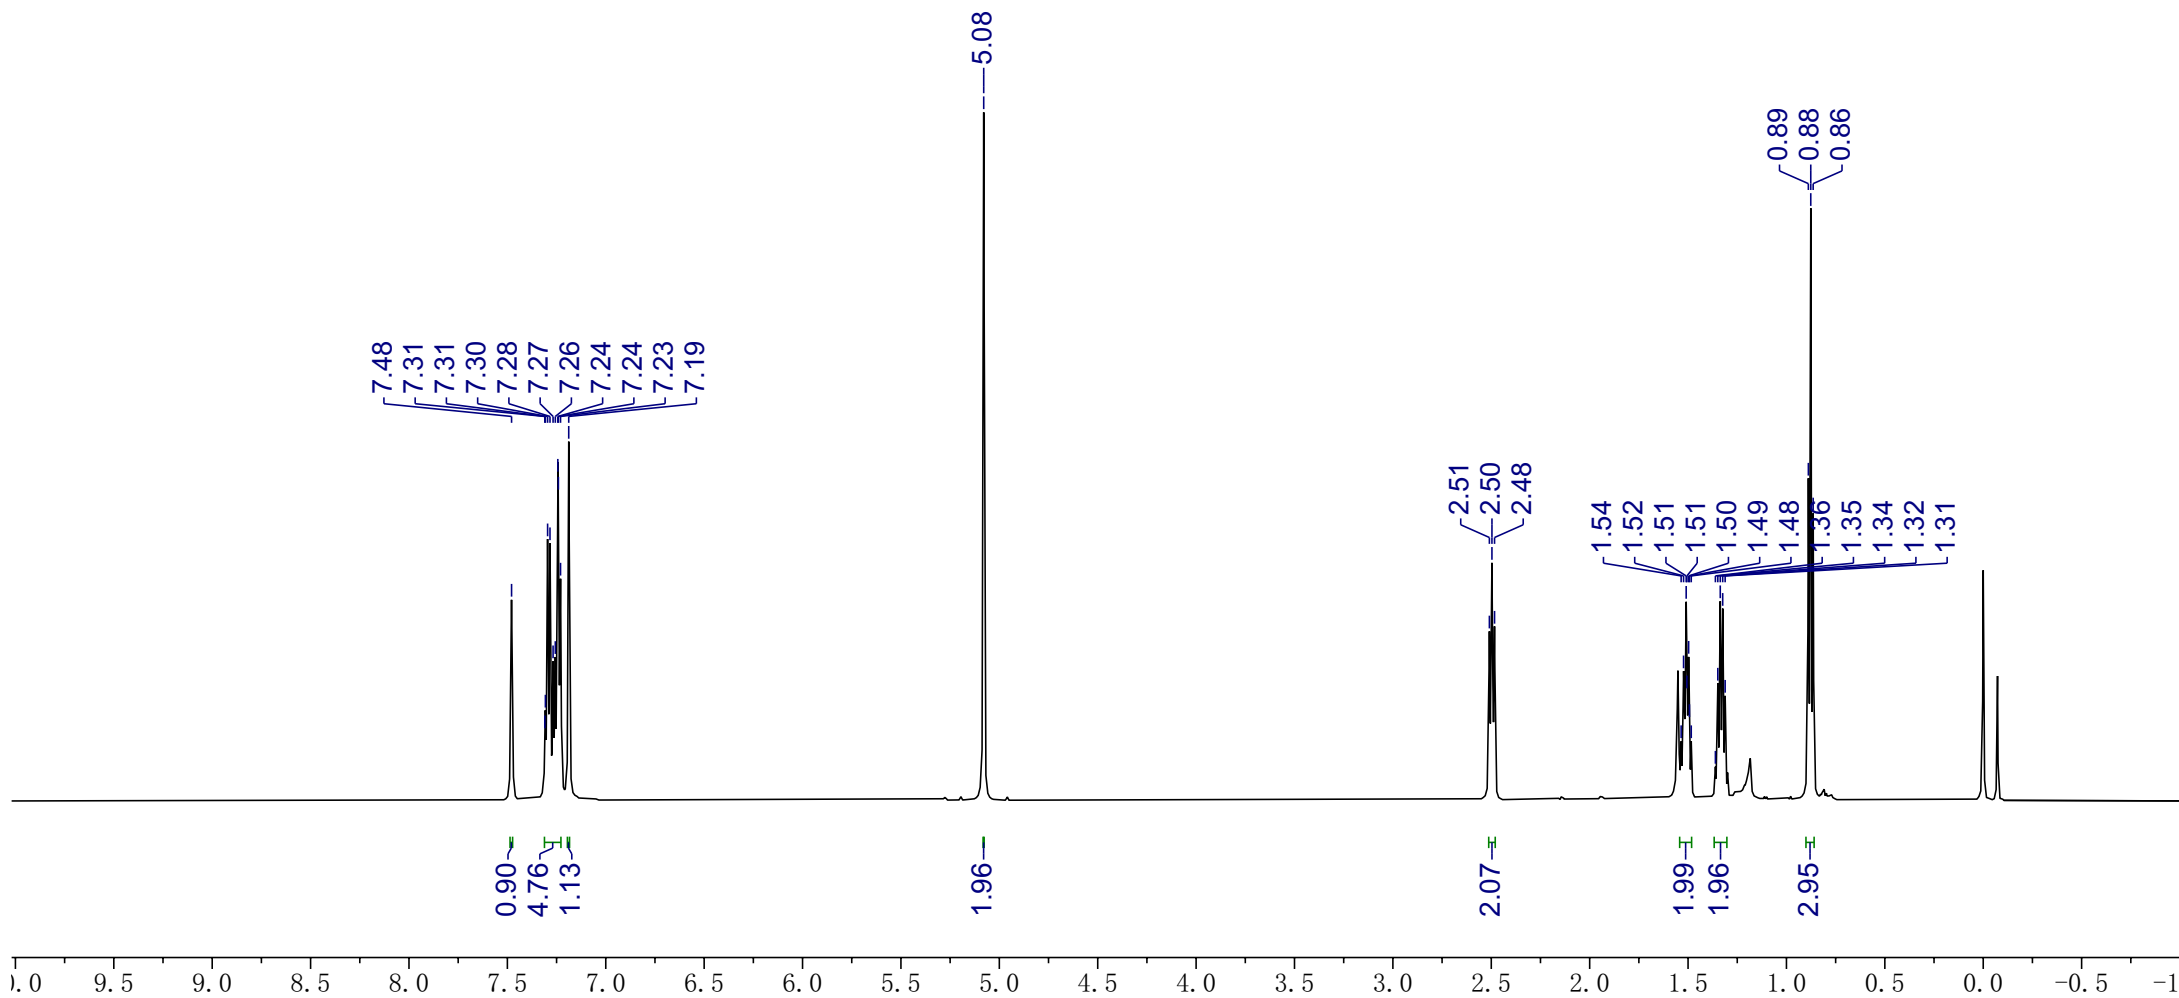

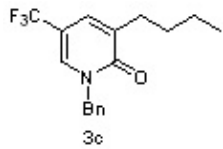

400 MHz, CDCl<sub>3</sub>

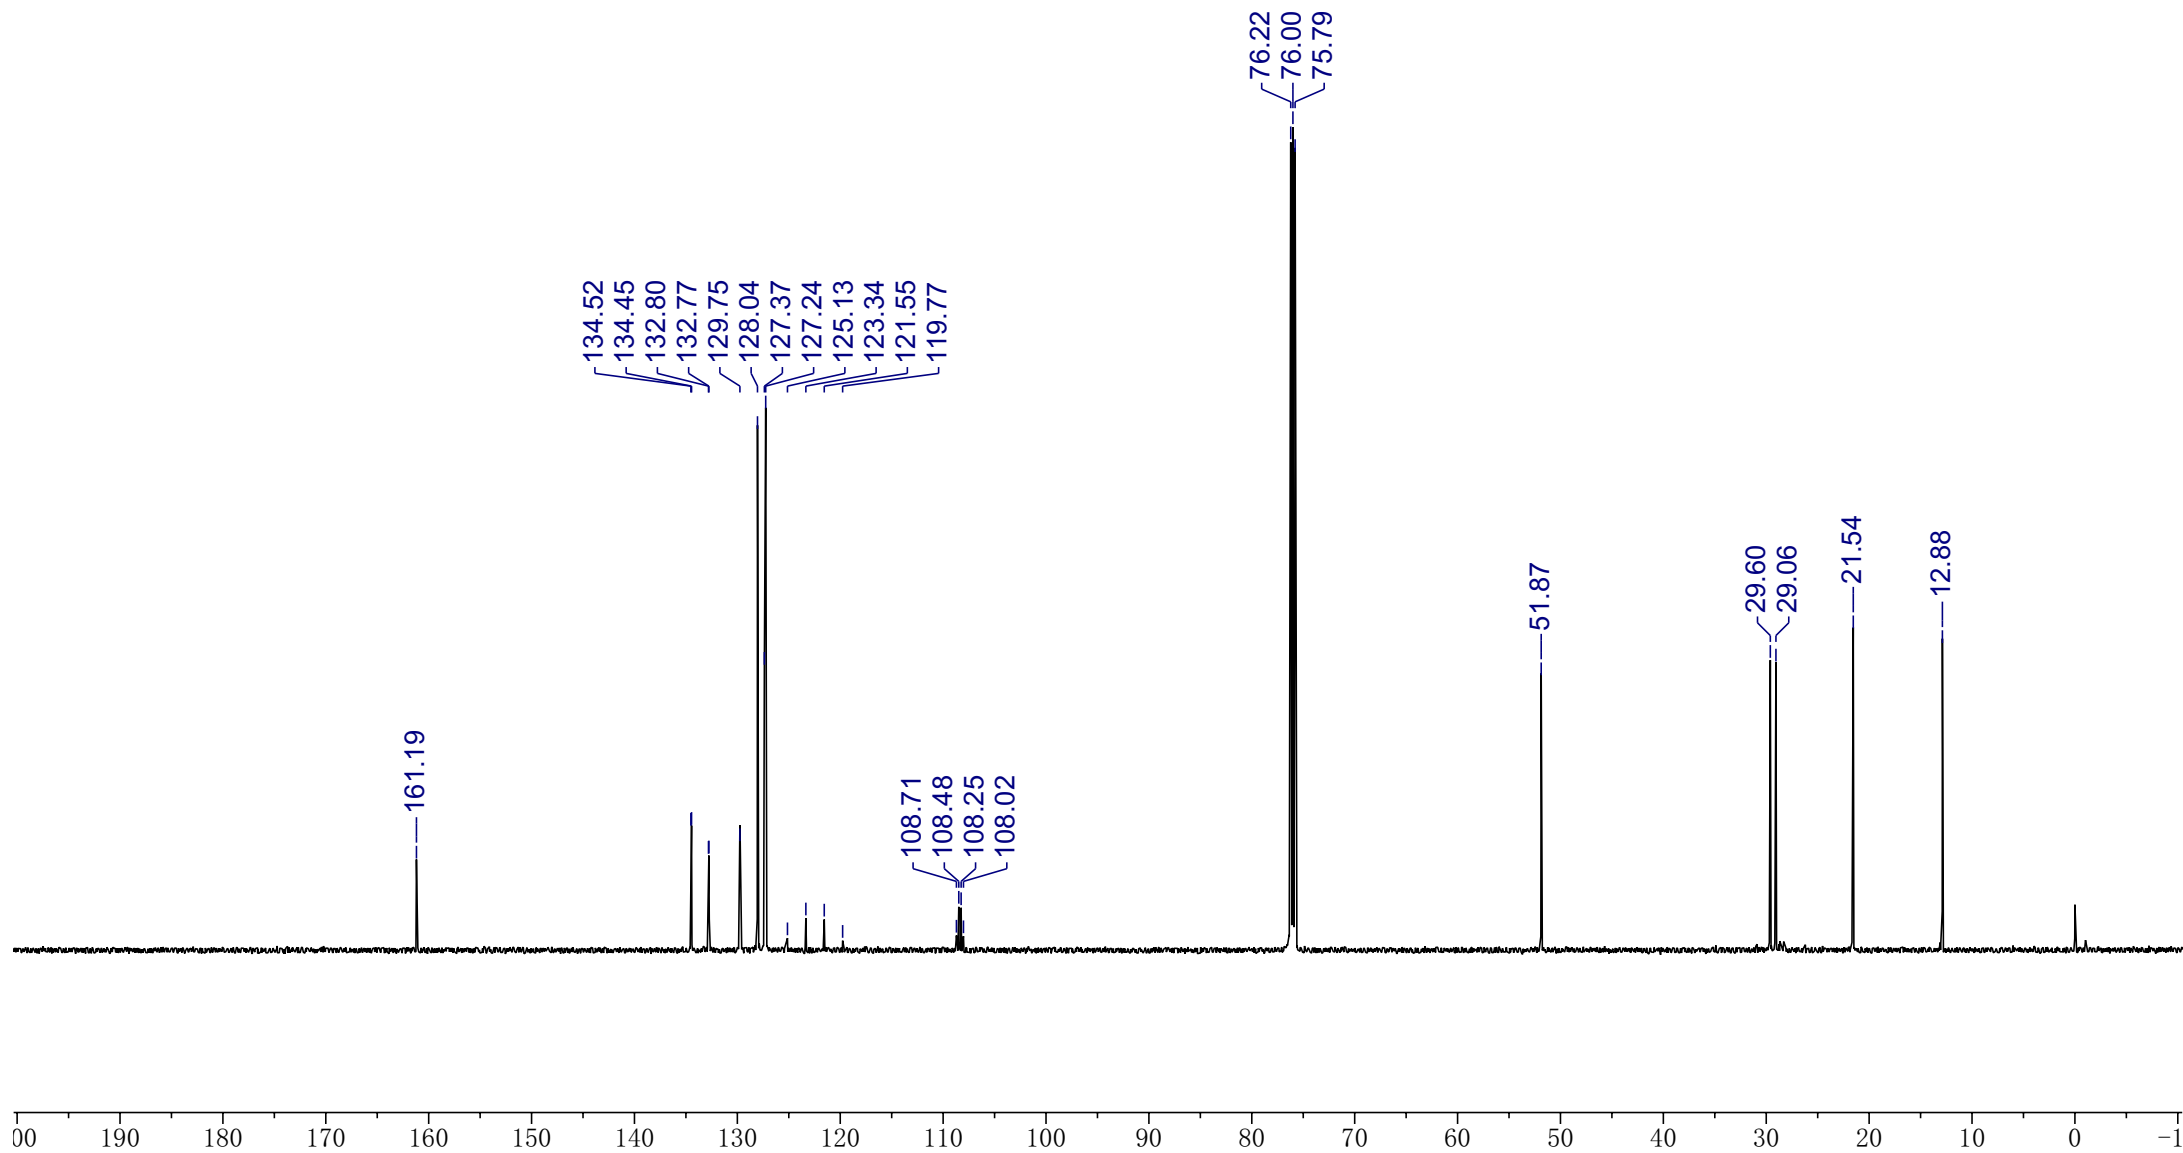



400 MHz, CDCl<sub>3</sub>

62.41

0 -10 -20 -30 -40 -50 -60 -70 -80 -90 -100 -110 -120 -130 -140 -150 -160 -170 -180 -190 -200 -210



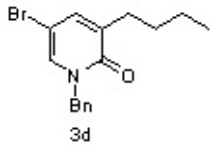

400 MHz, CDCl<sub>3</sub>

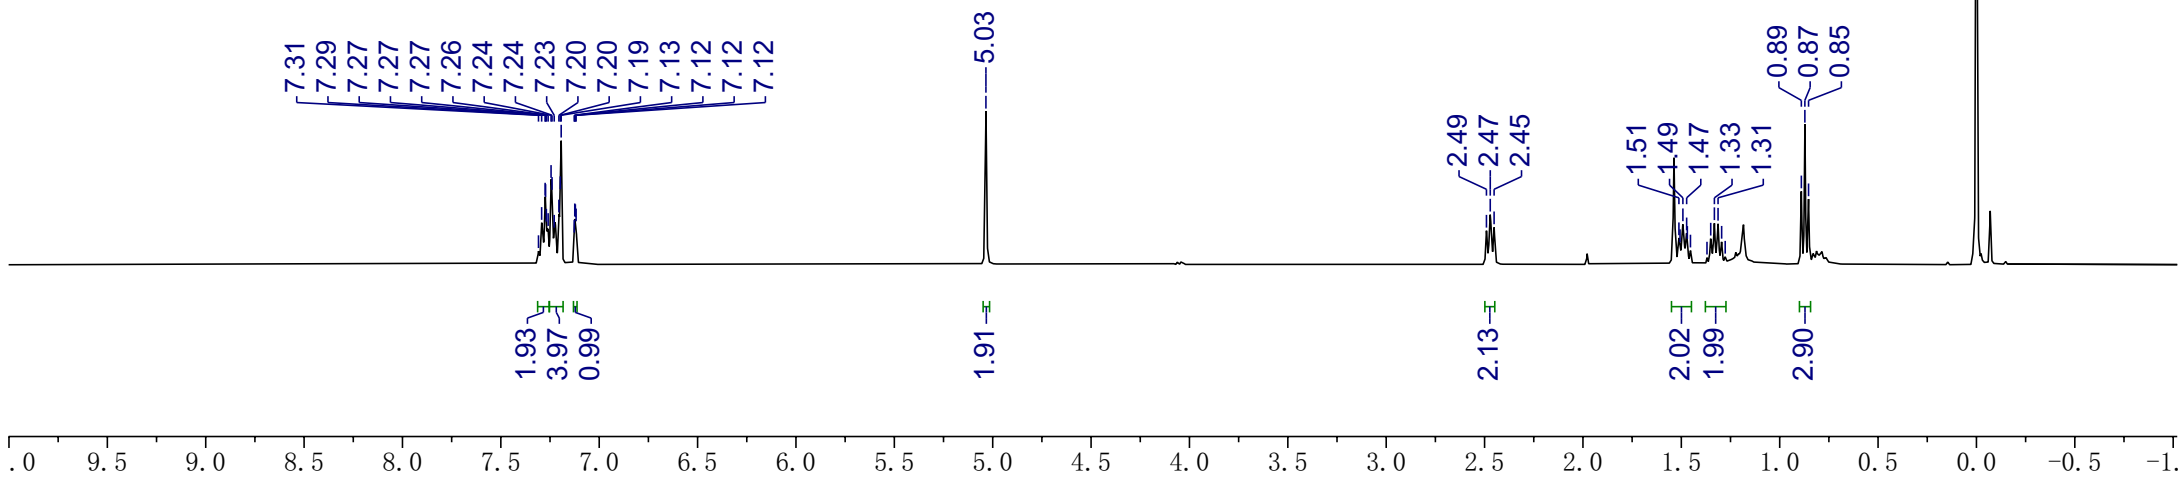

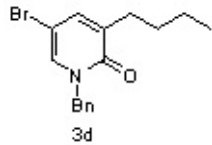

400 MHz, CDCl<sub>3</sub>

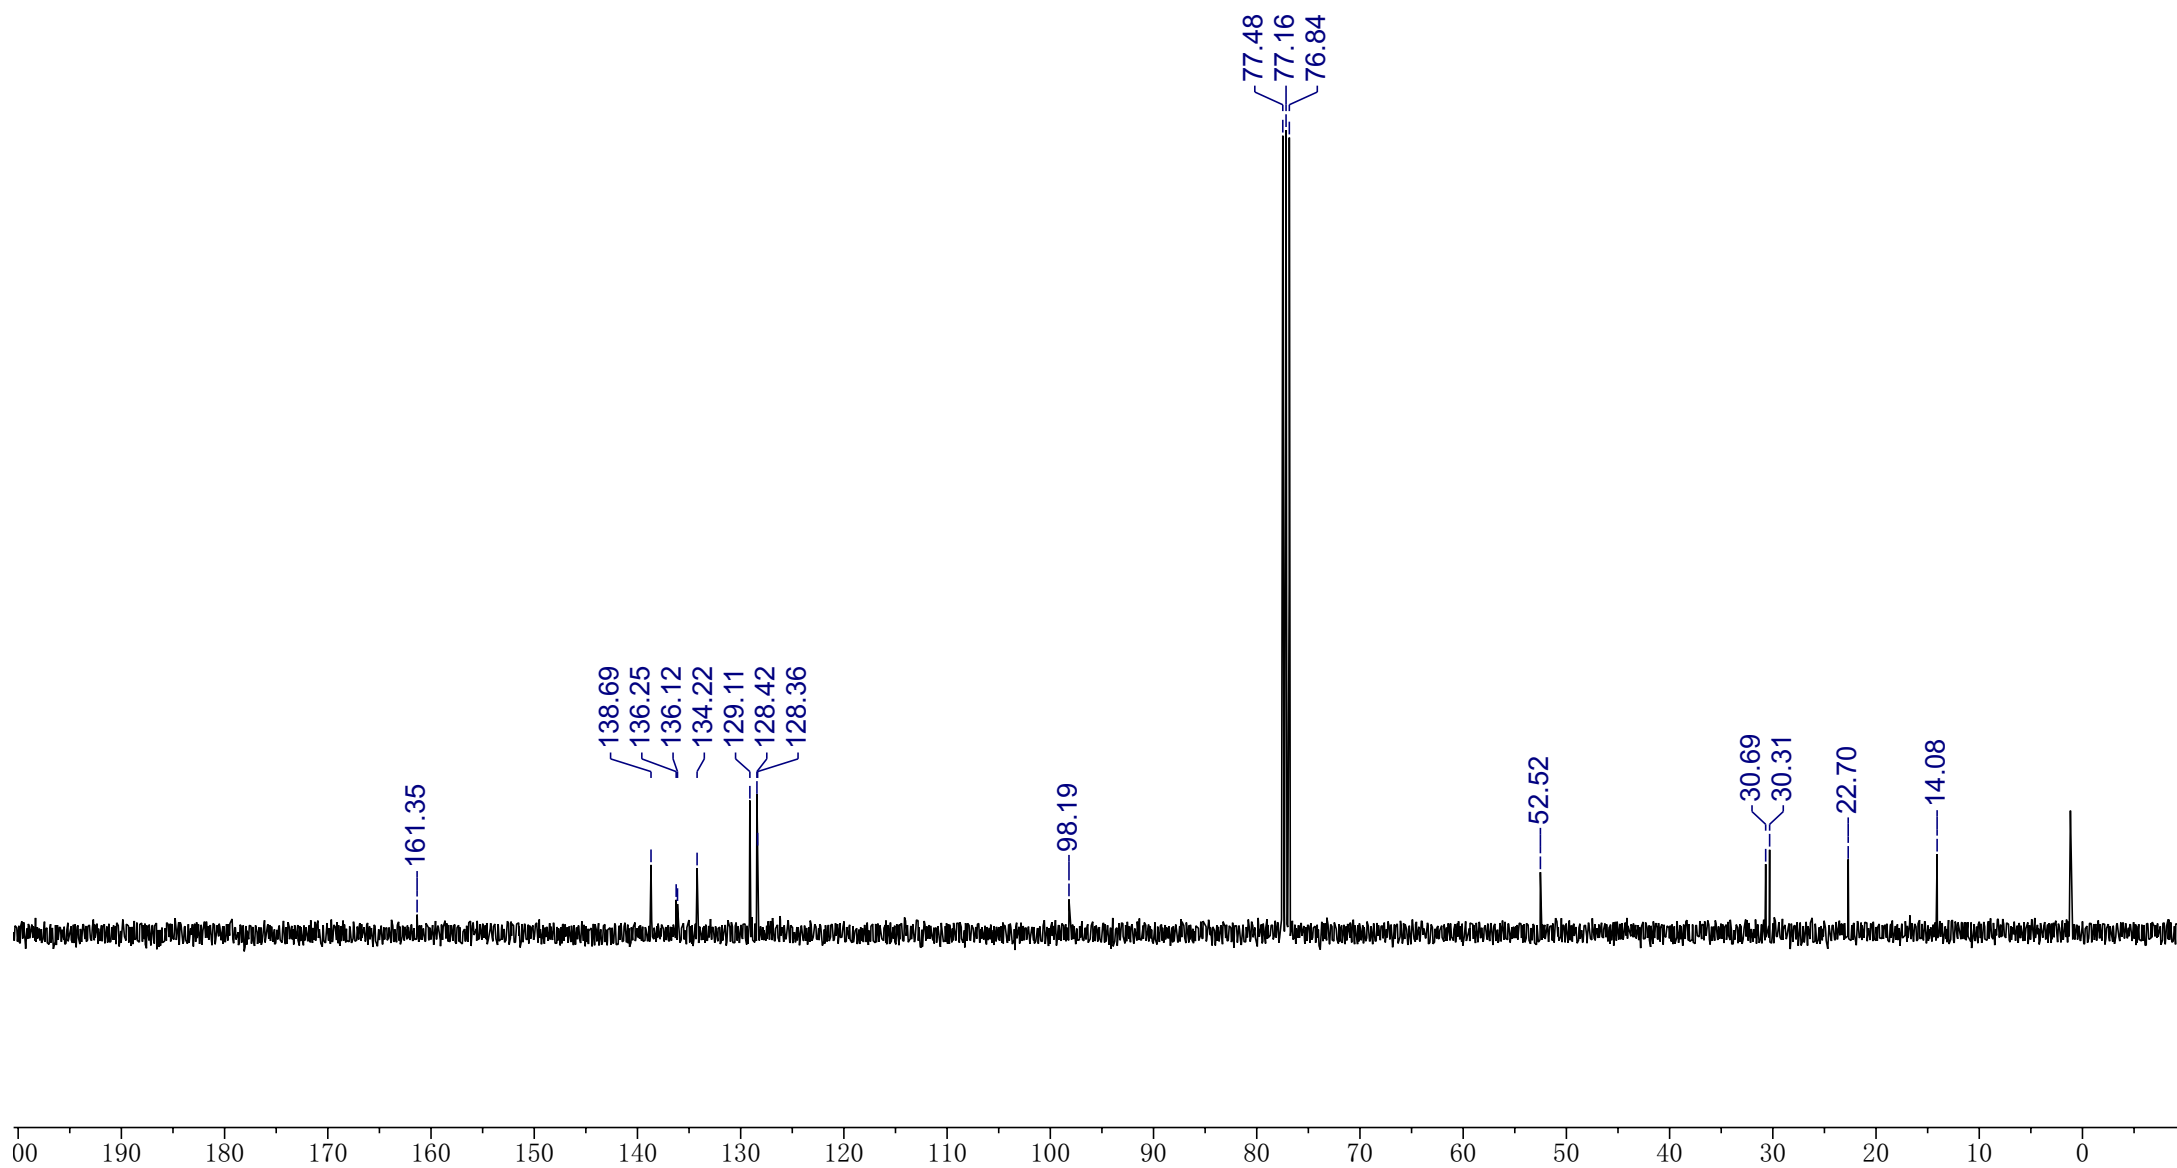

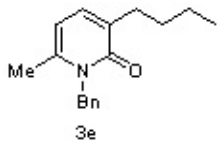

400 MHz, CDCl<sub>3</sub>

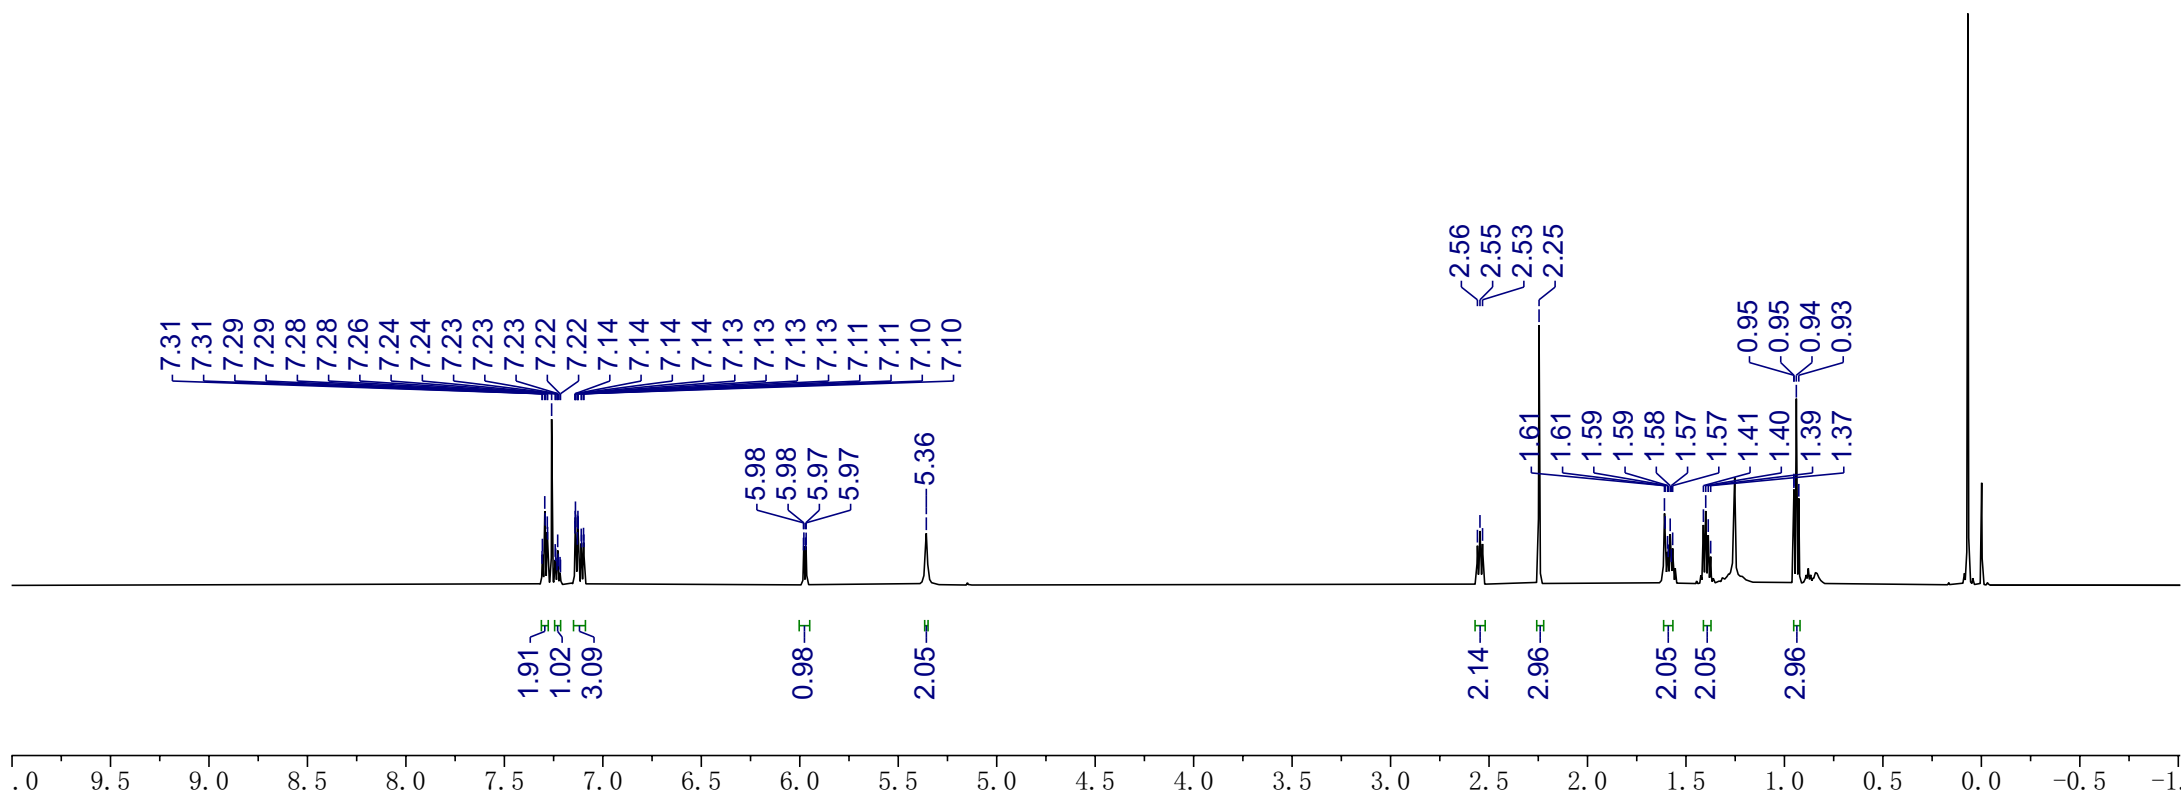

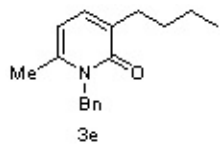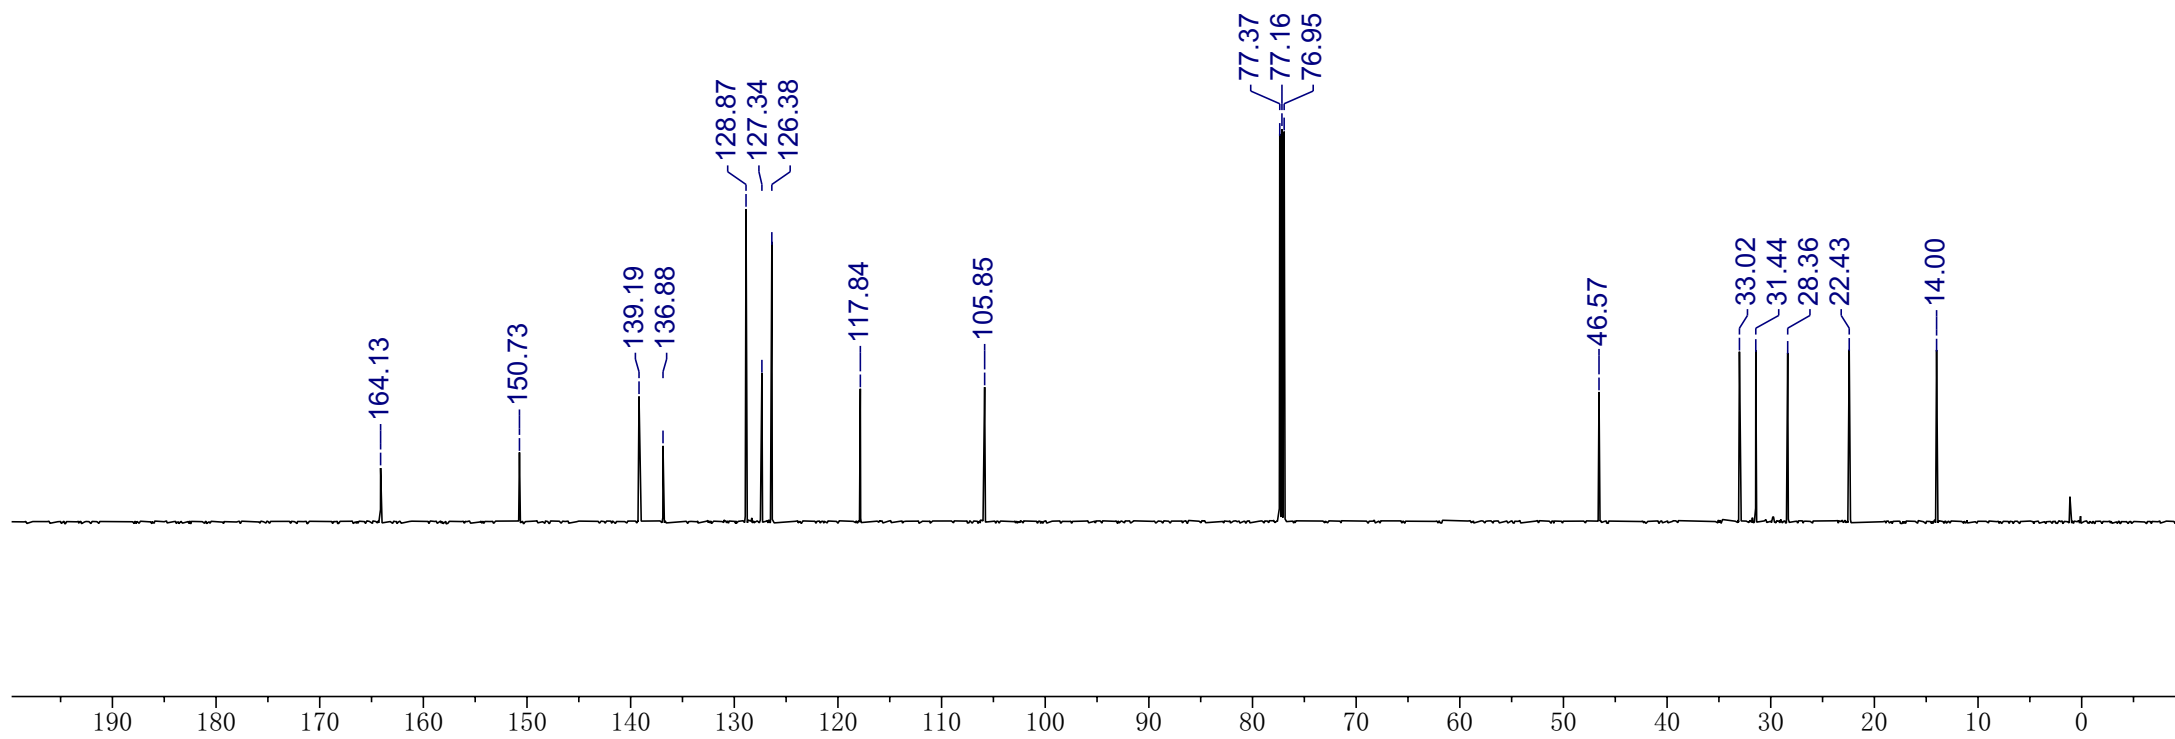

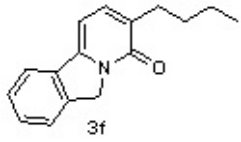

400 MHz, CDCl<sub>3</sub>

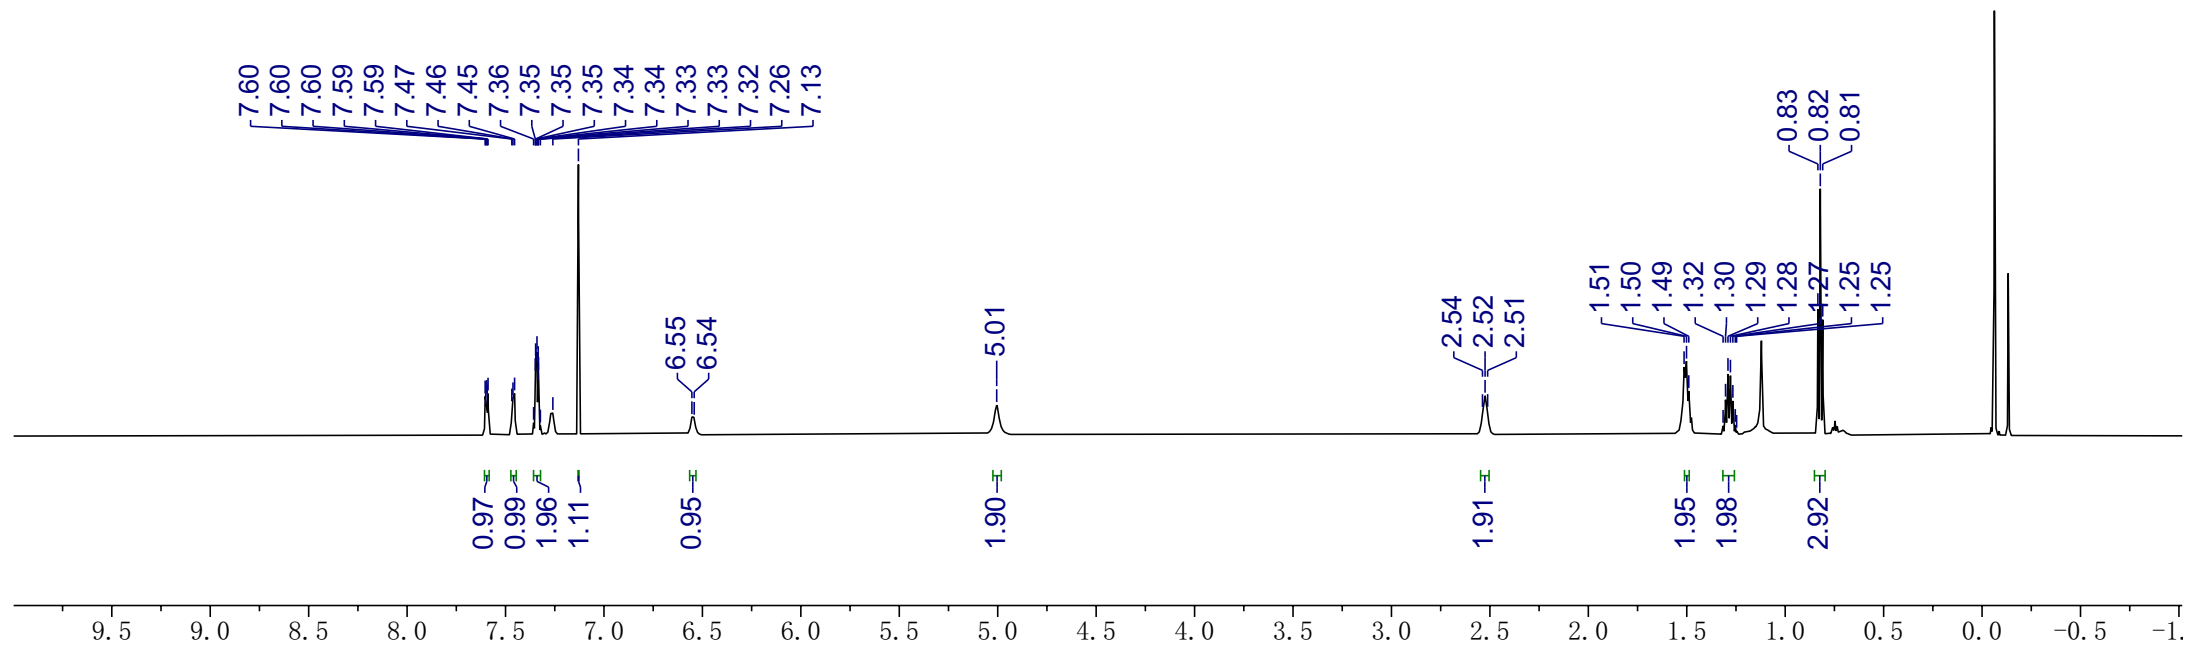

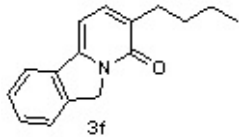

400 MHz, CDCl<sub>3</sub>

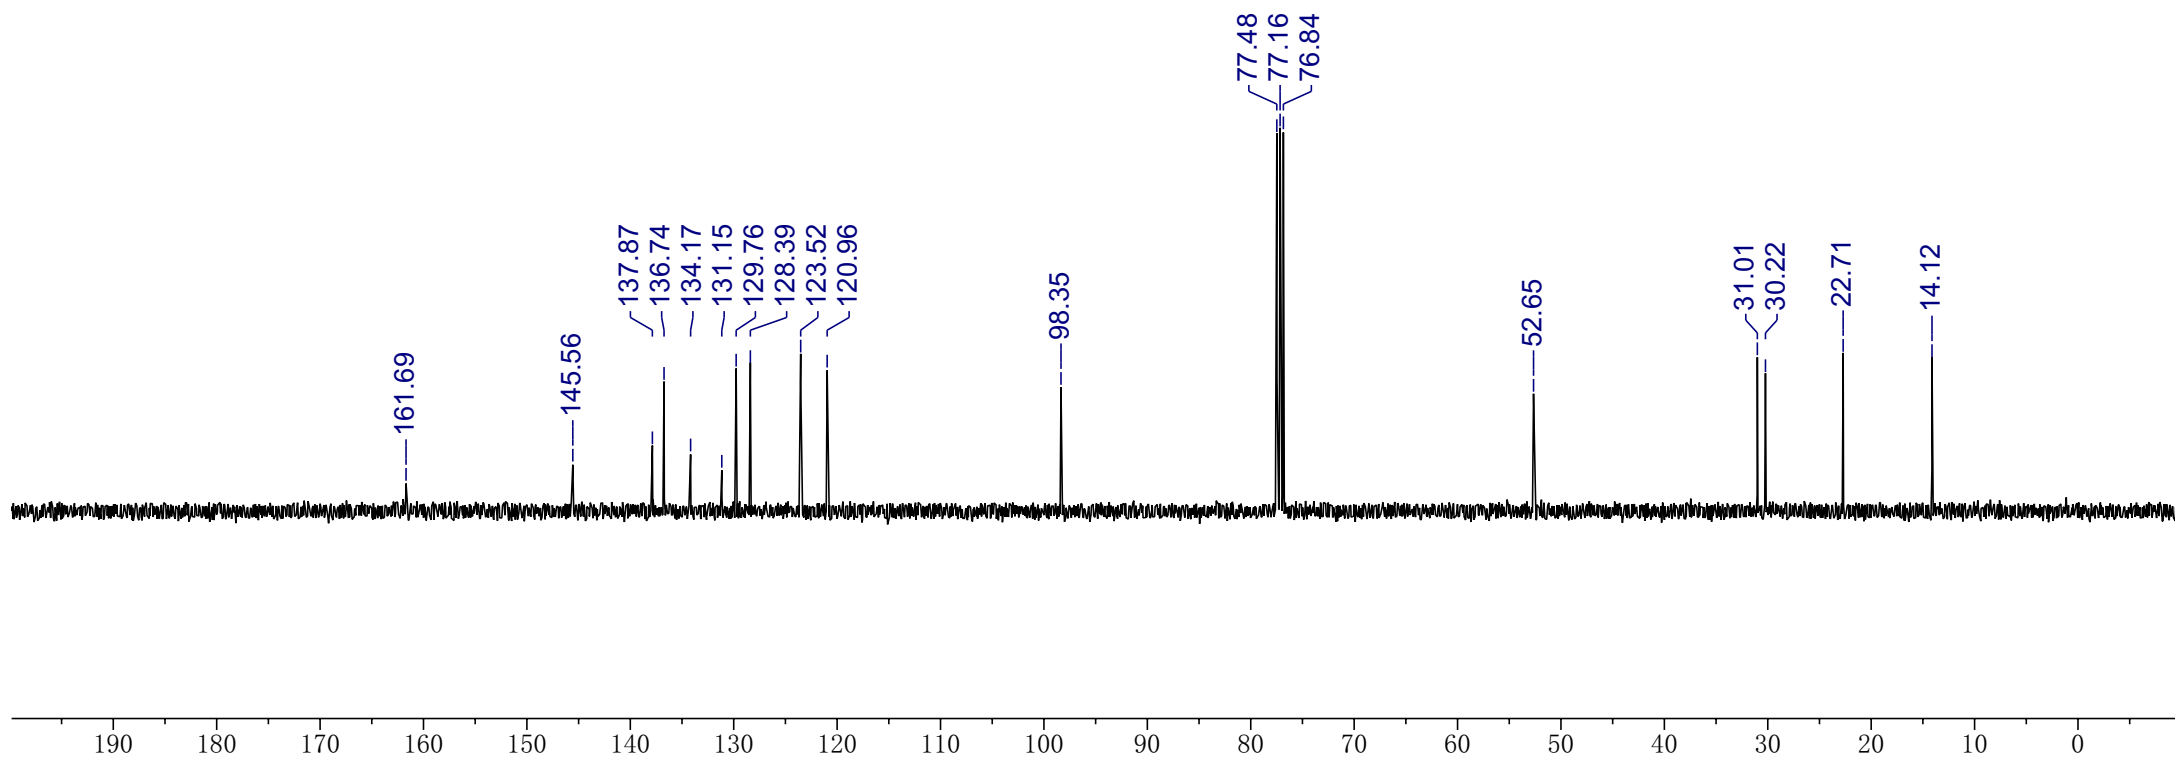

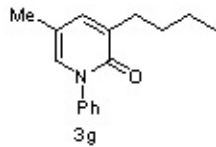

400 MHz, CDCl<sub>3</sub>

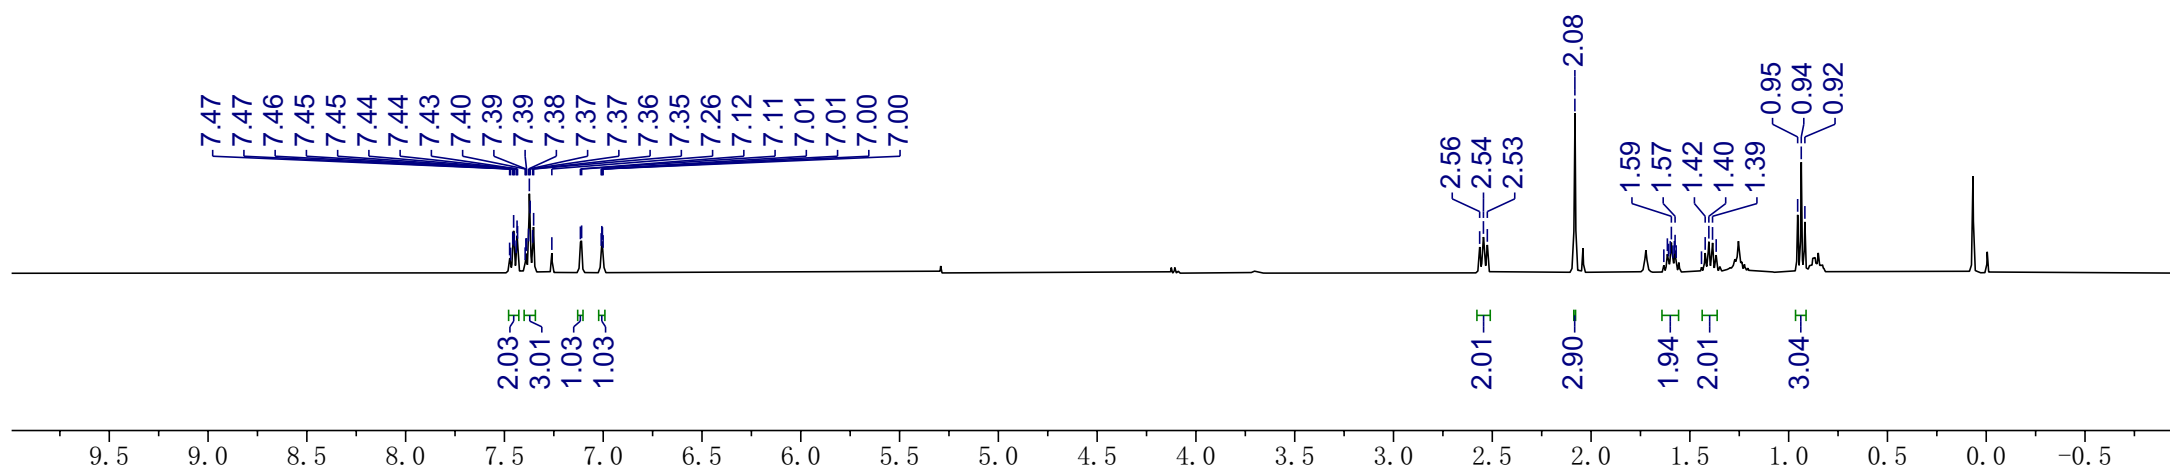

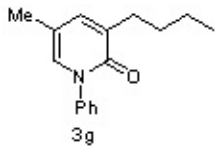

400 MHz, CDCl<sub>3</sub>

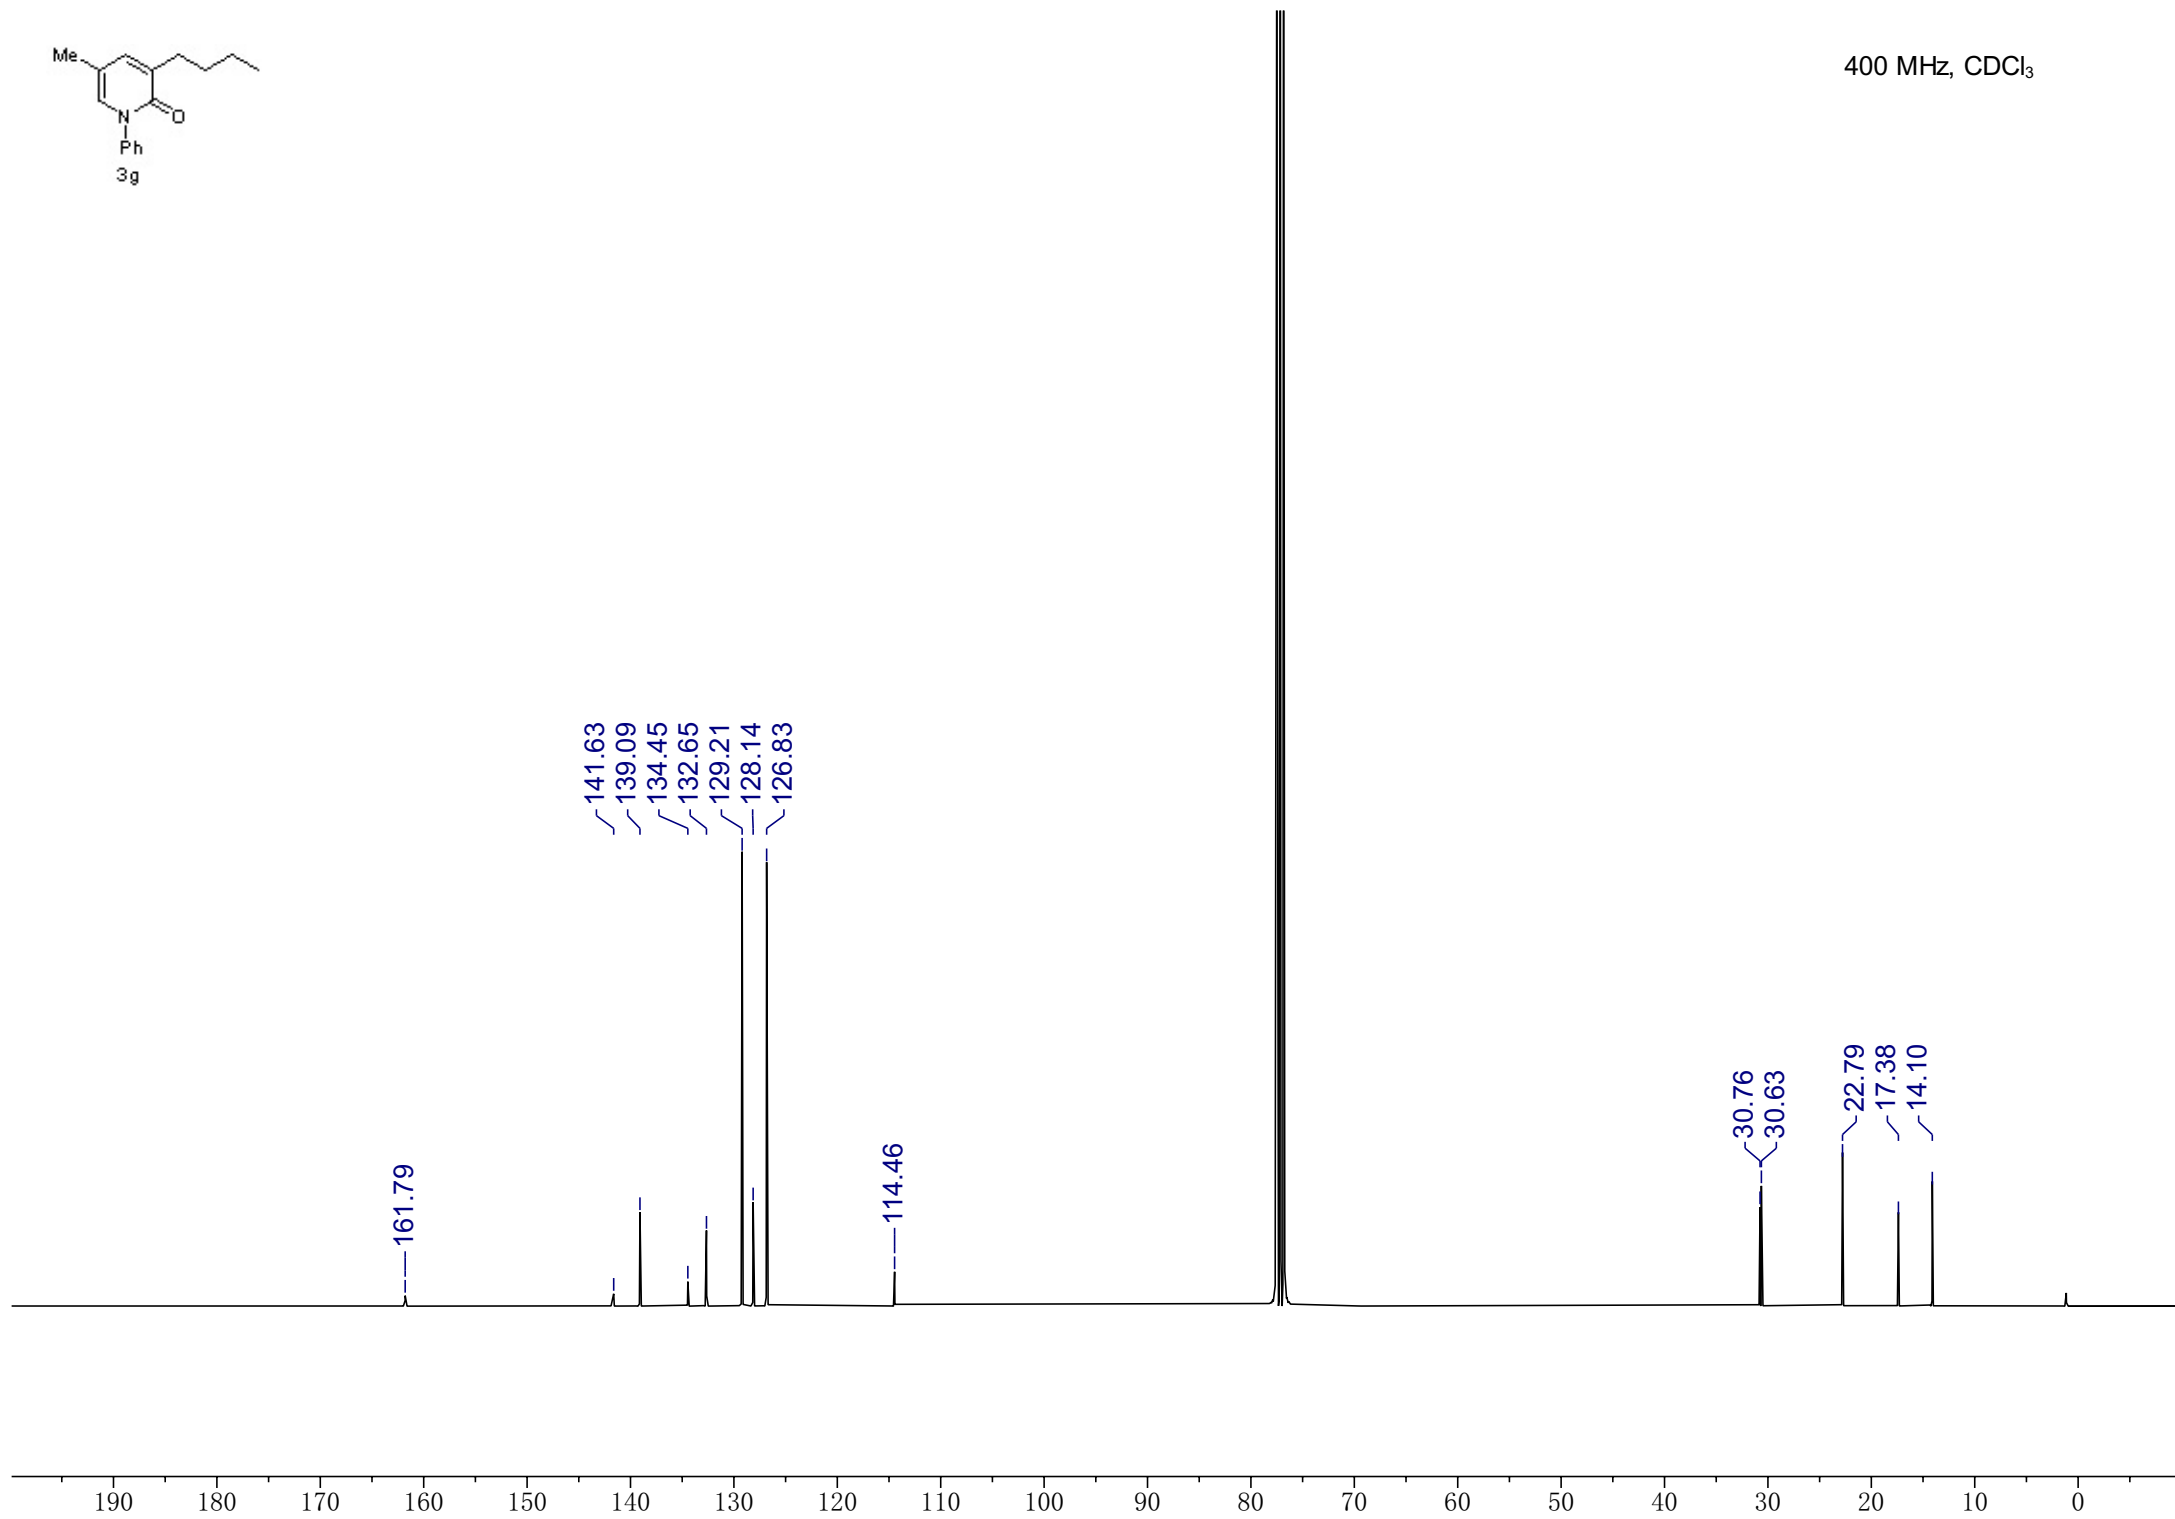



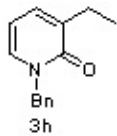

400 MHz, CDCl<sub>3</sub>

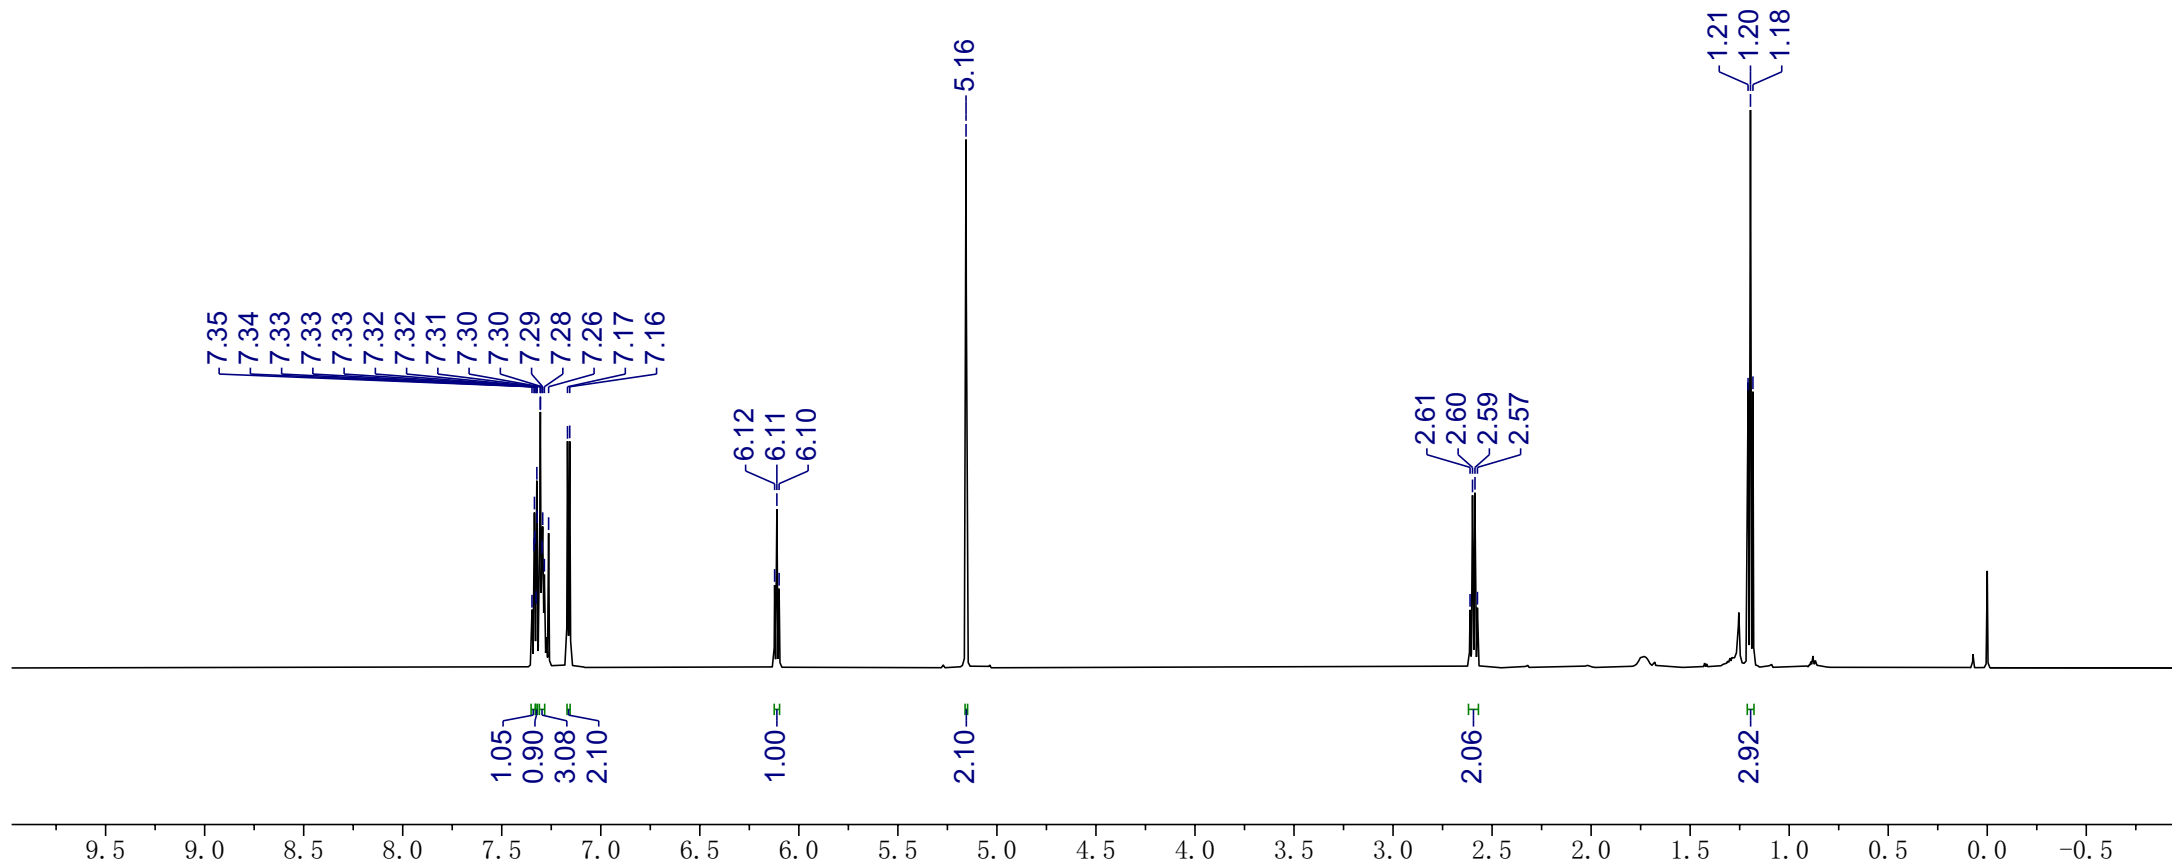

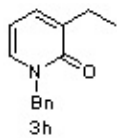

400 MHz, CDCl<sub>3</sub>

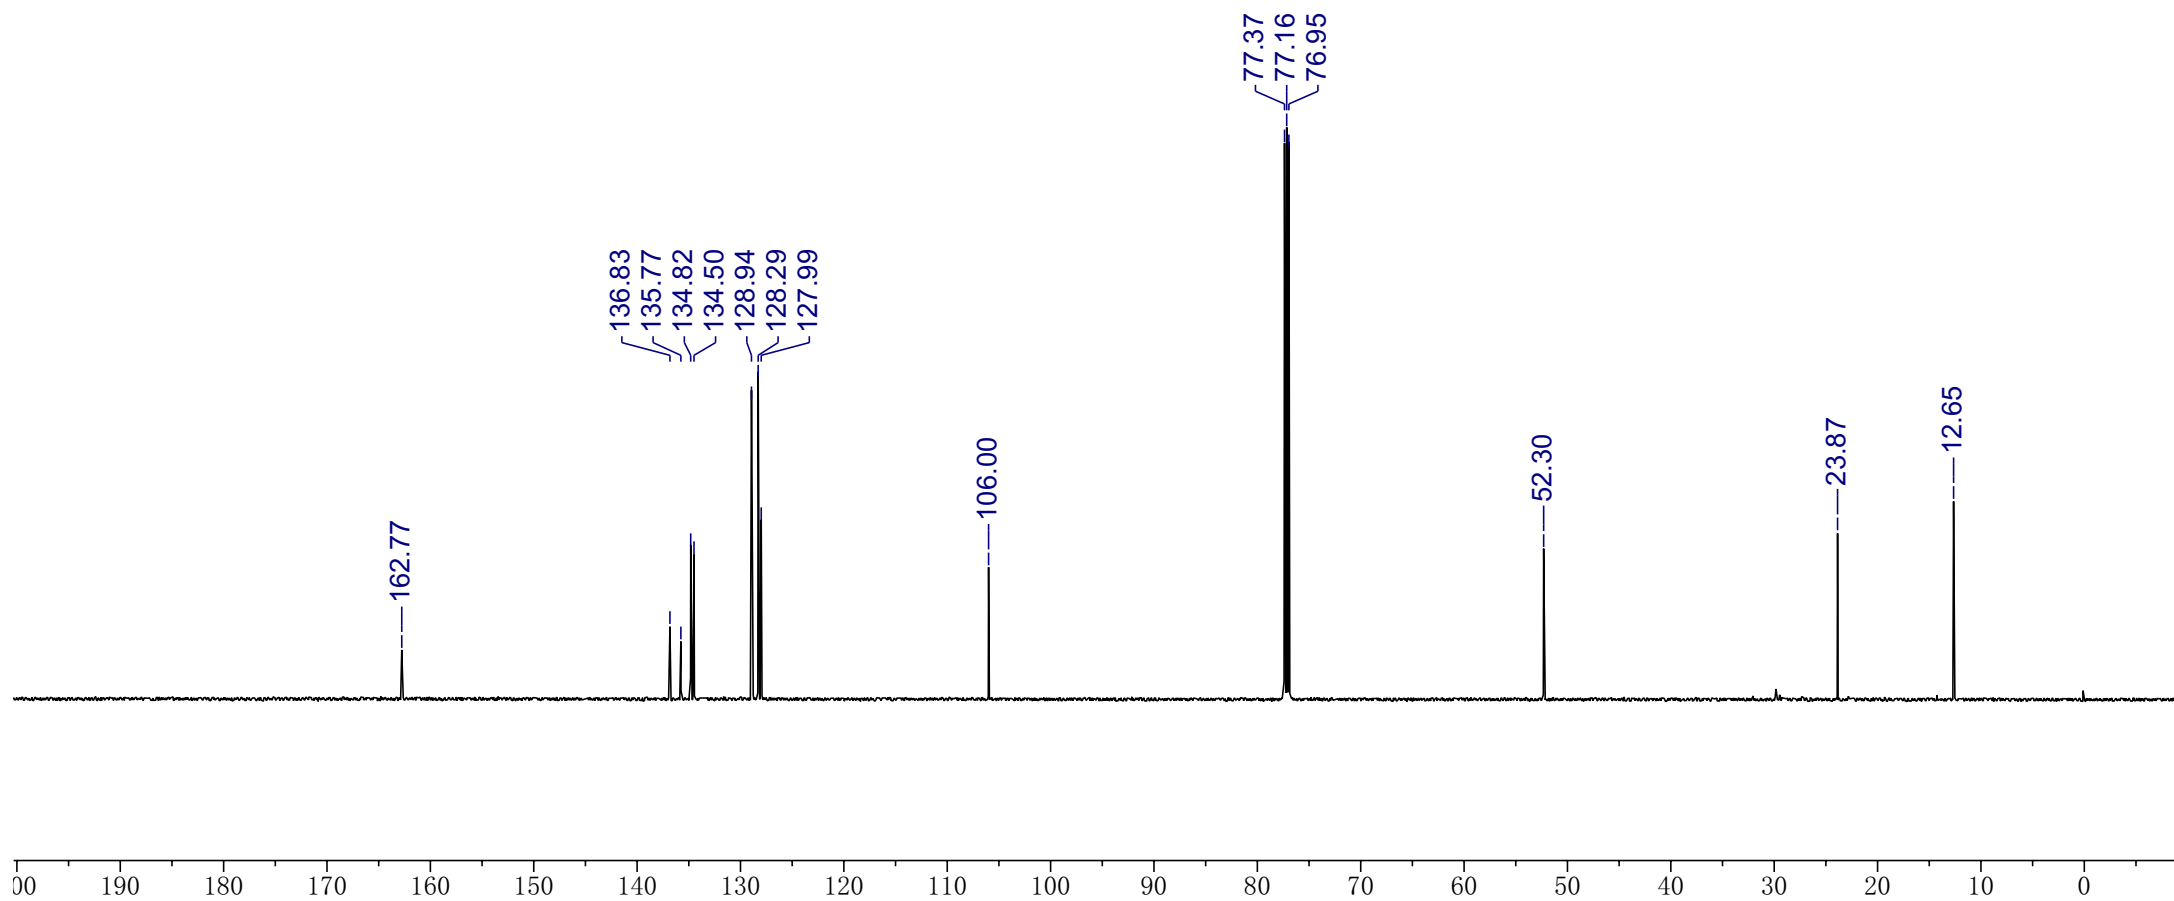

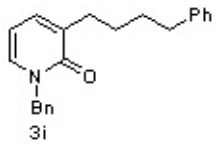

400 MHz, CDCl<sub>3</sub>

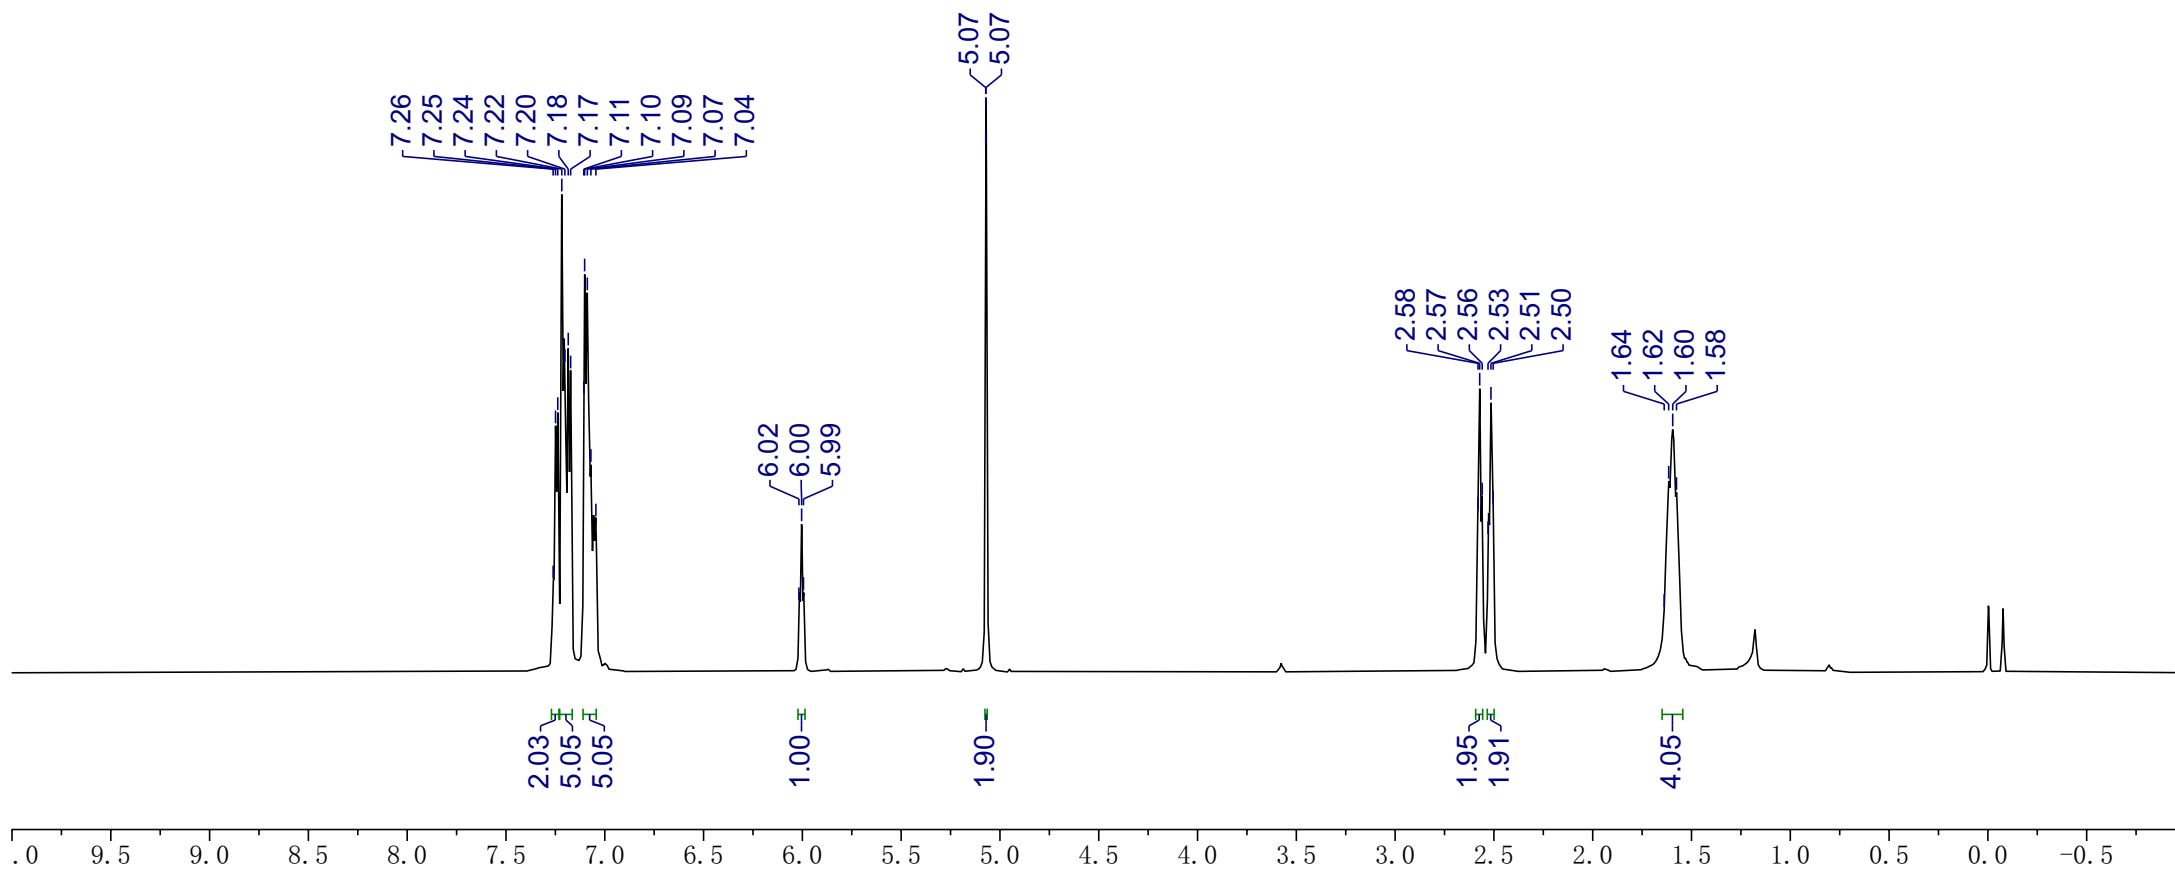

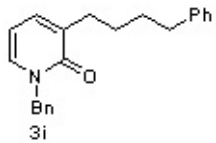

400 MHz, CDCl<sub>3</sub>

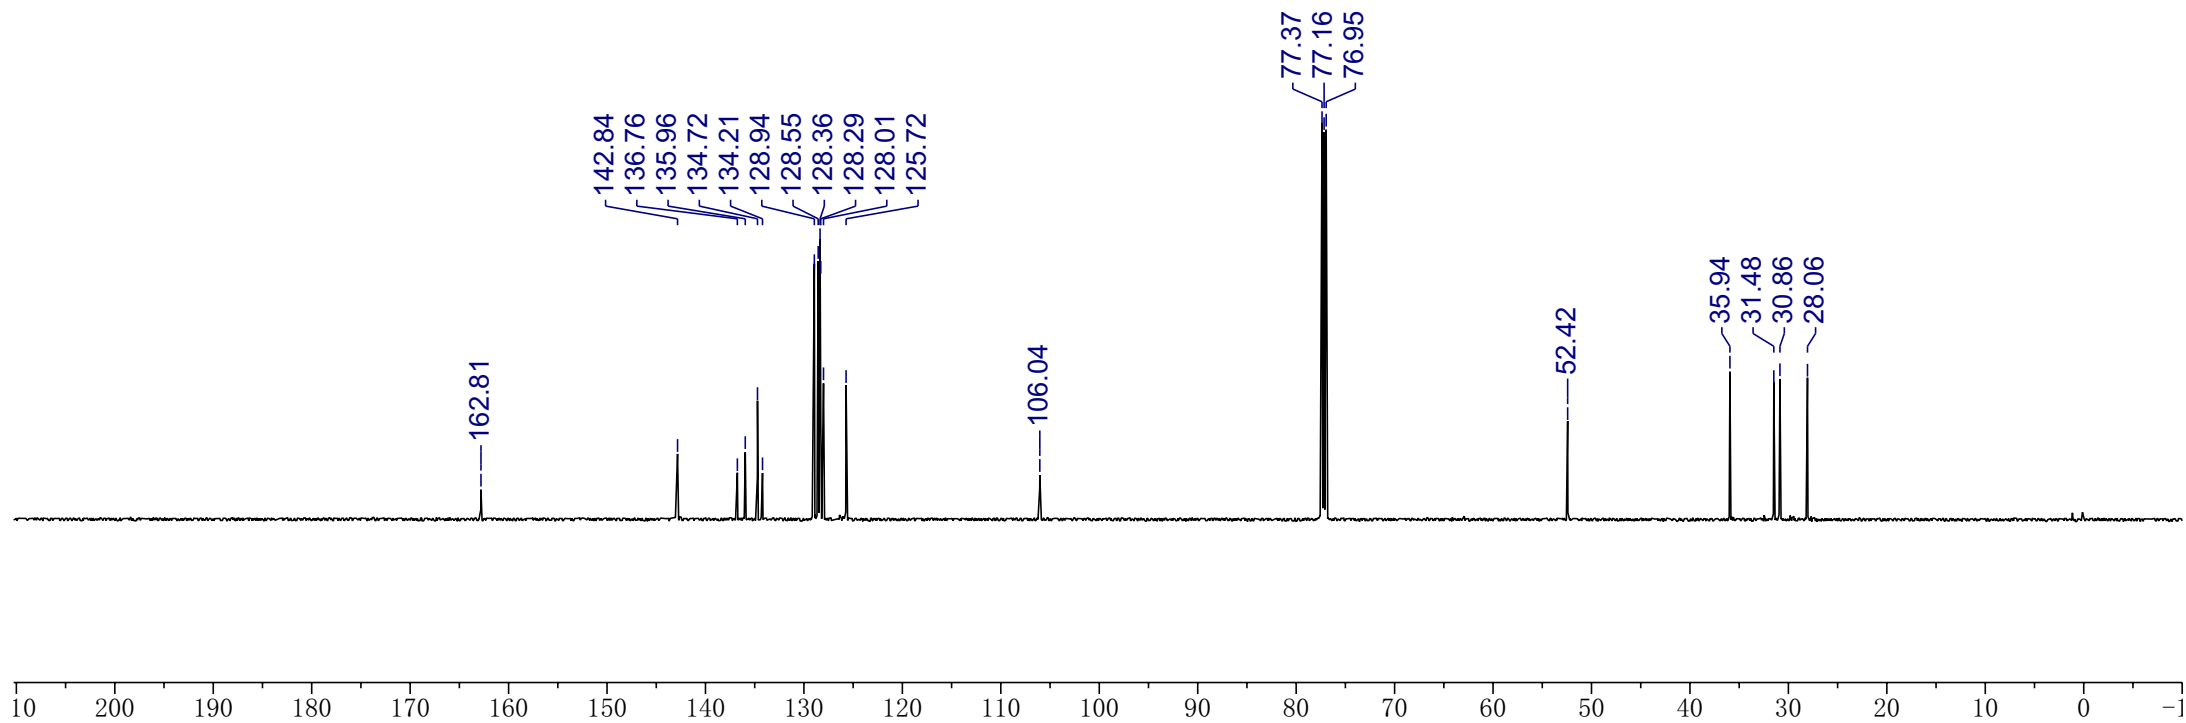

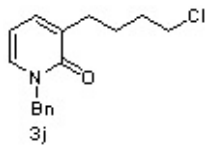

400 MHz, CDCl<sub>3</sub>

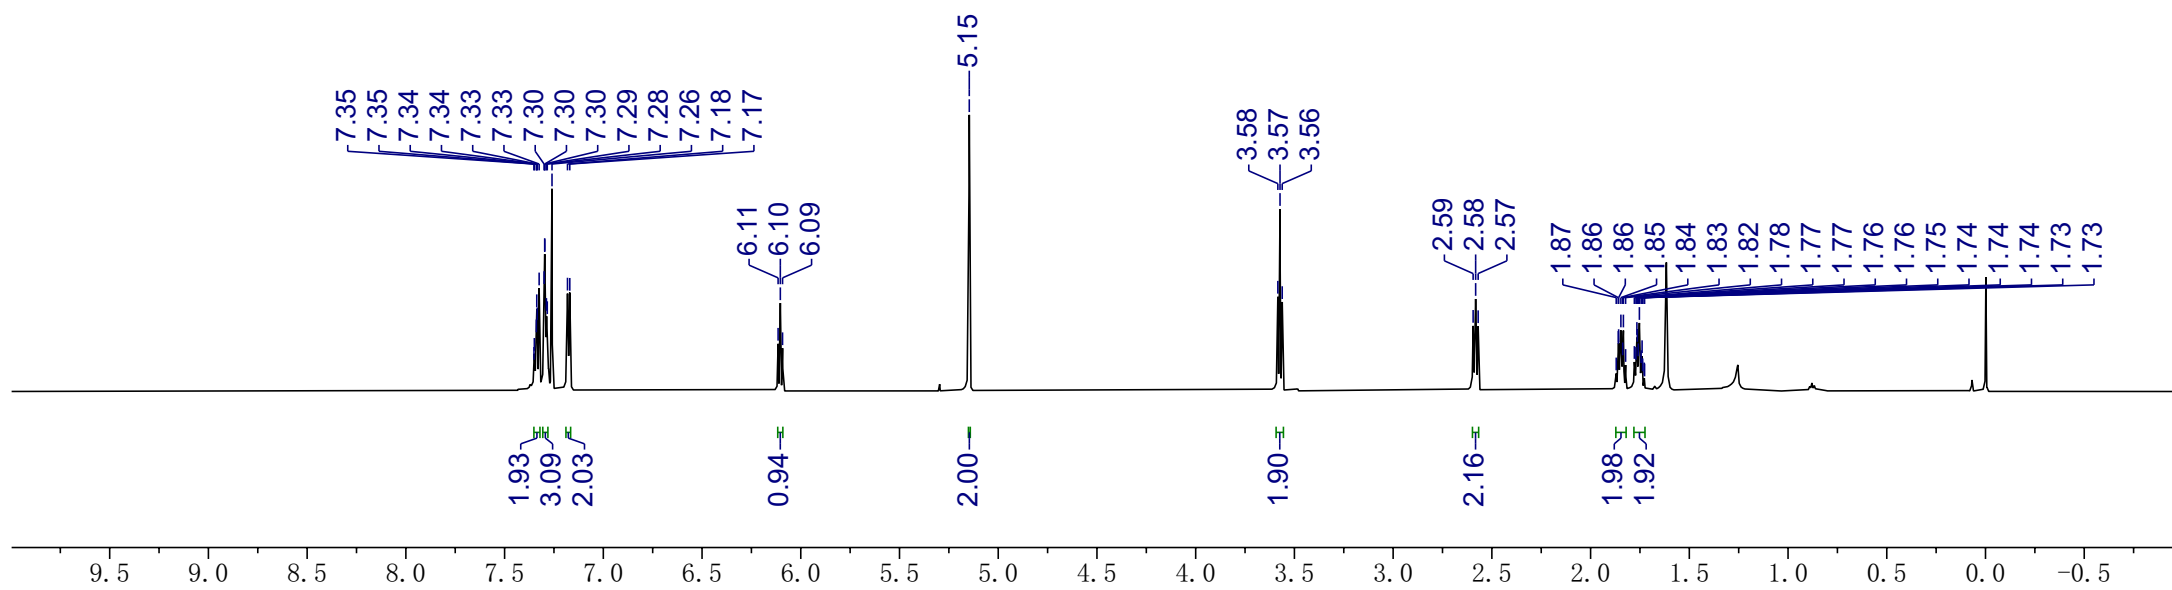



400 MHz, CDCl<sub>3</sub>

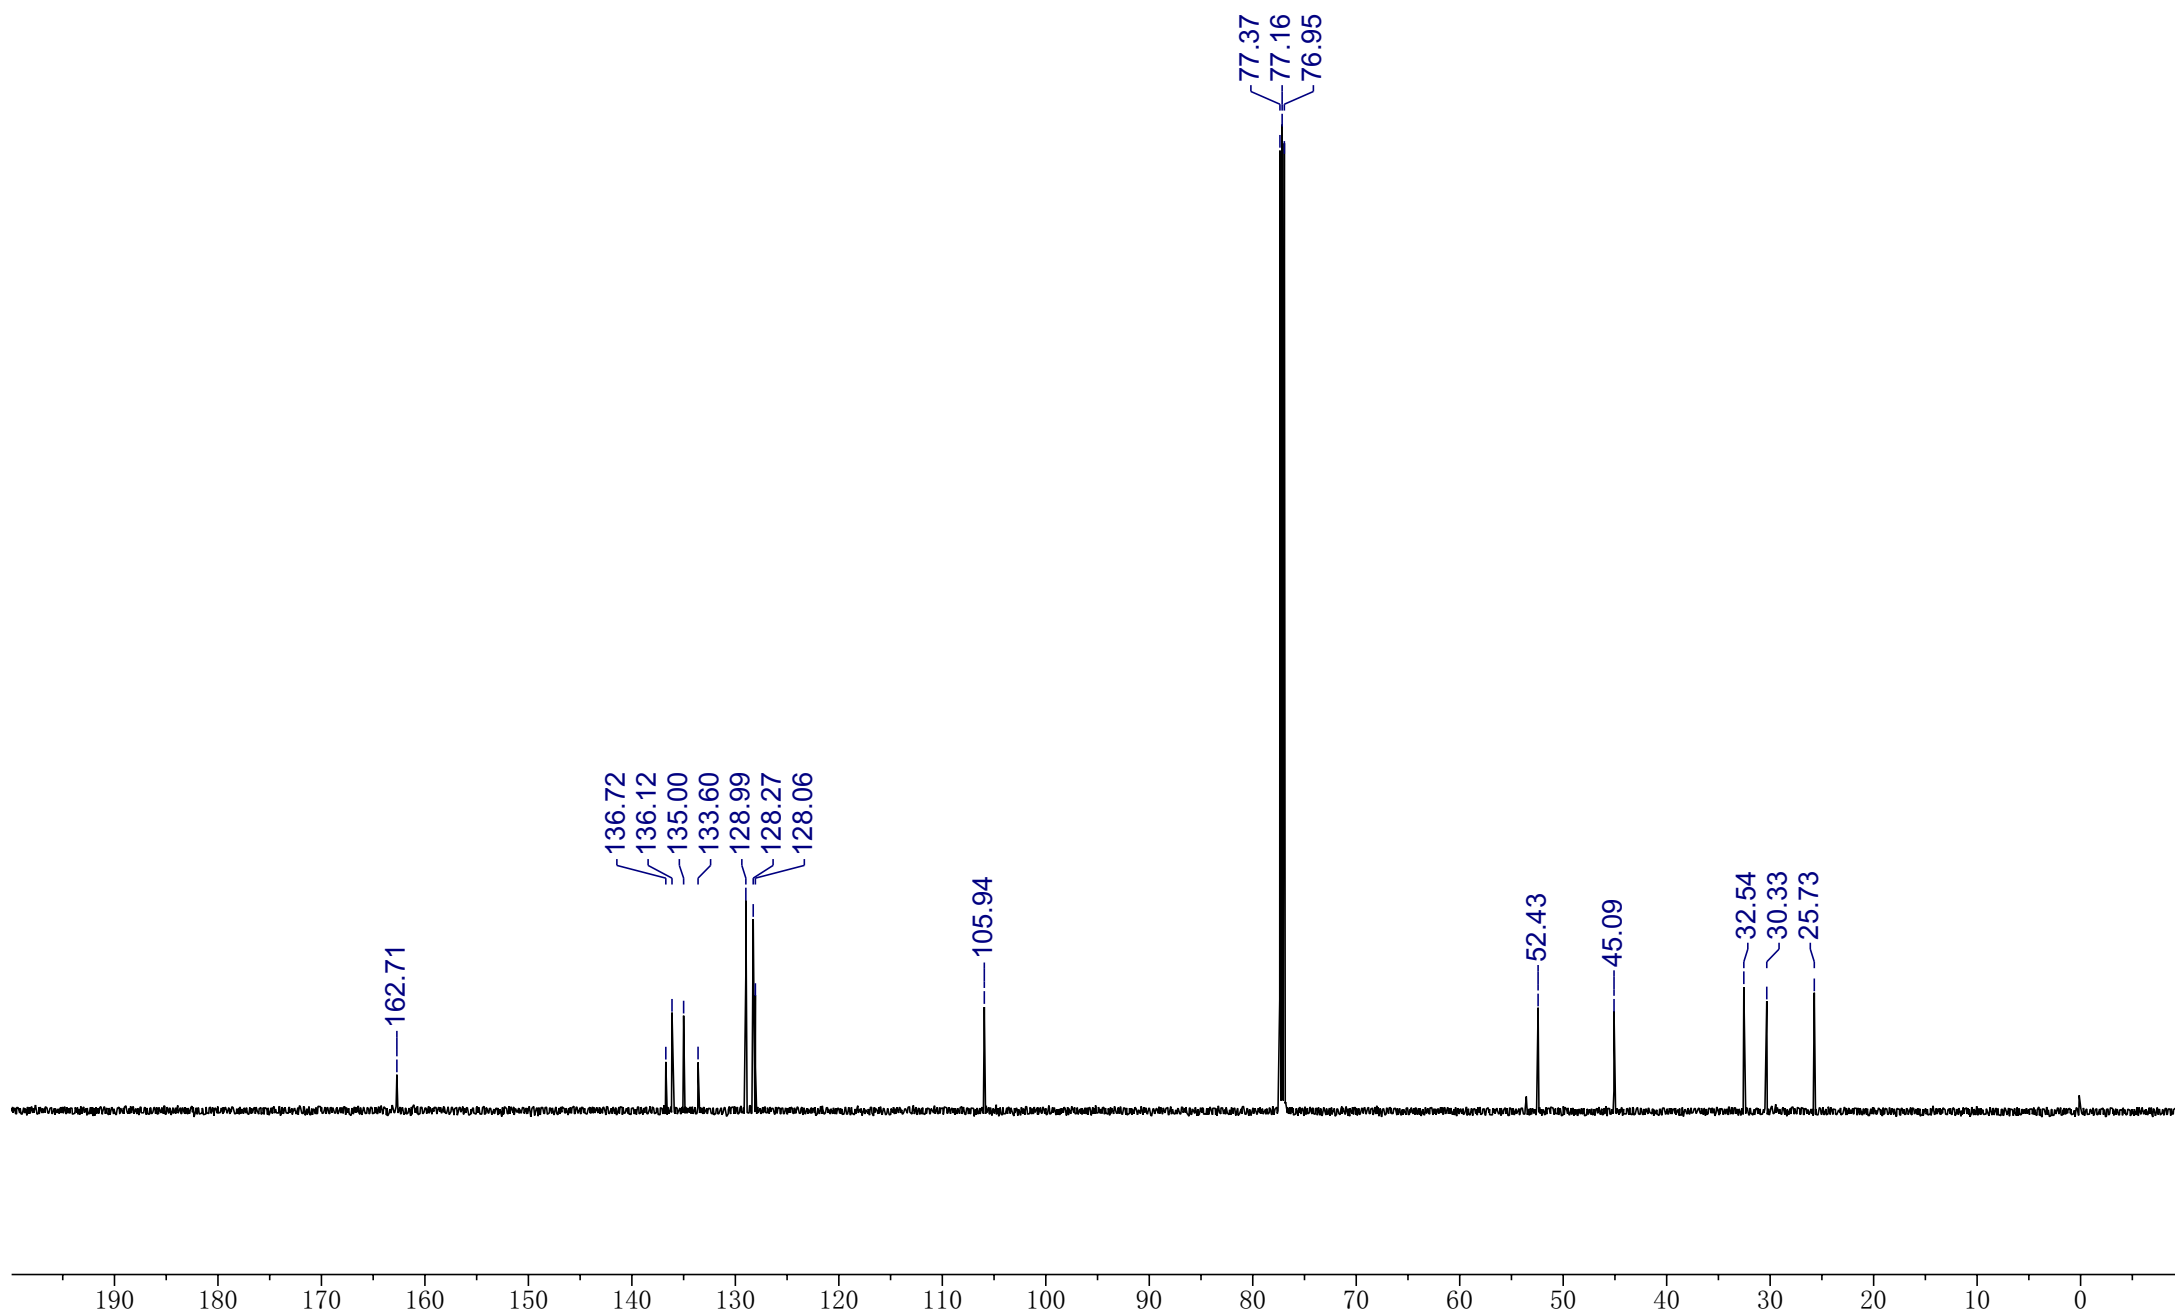

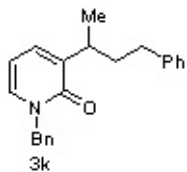

400 MHz, CDCl<sub>3</sub>

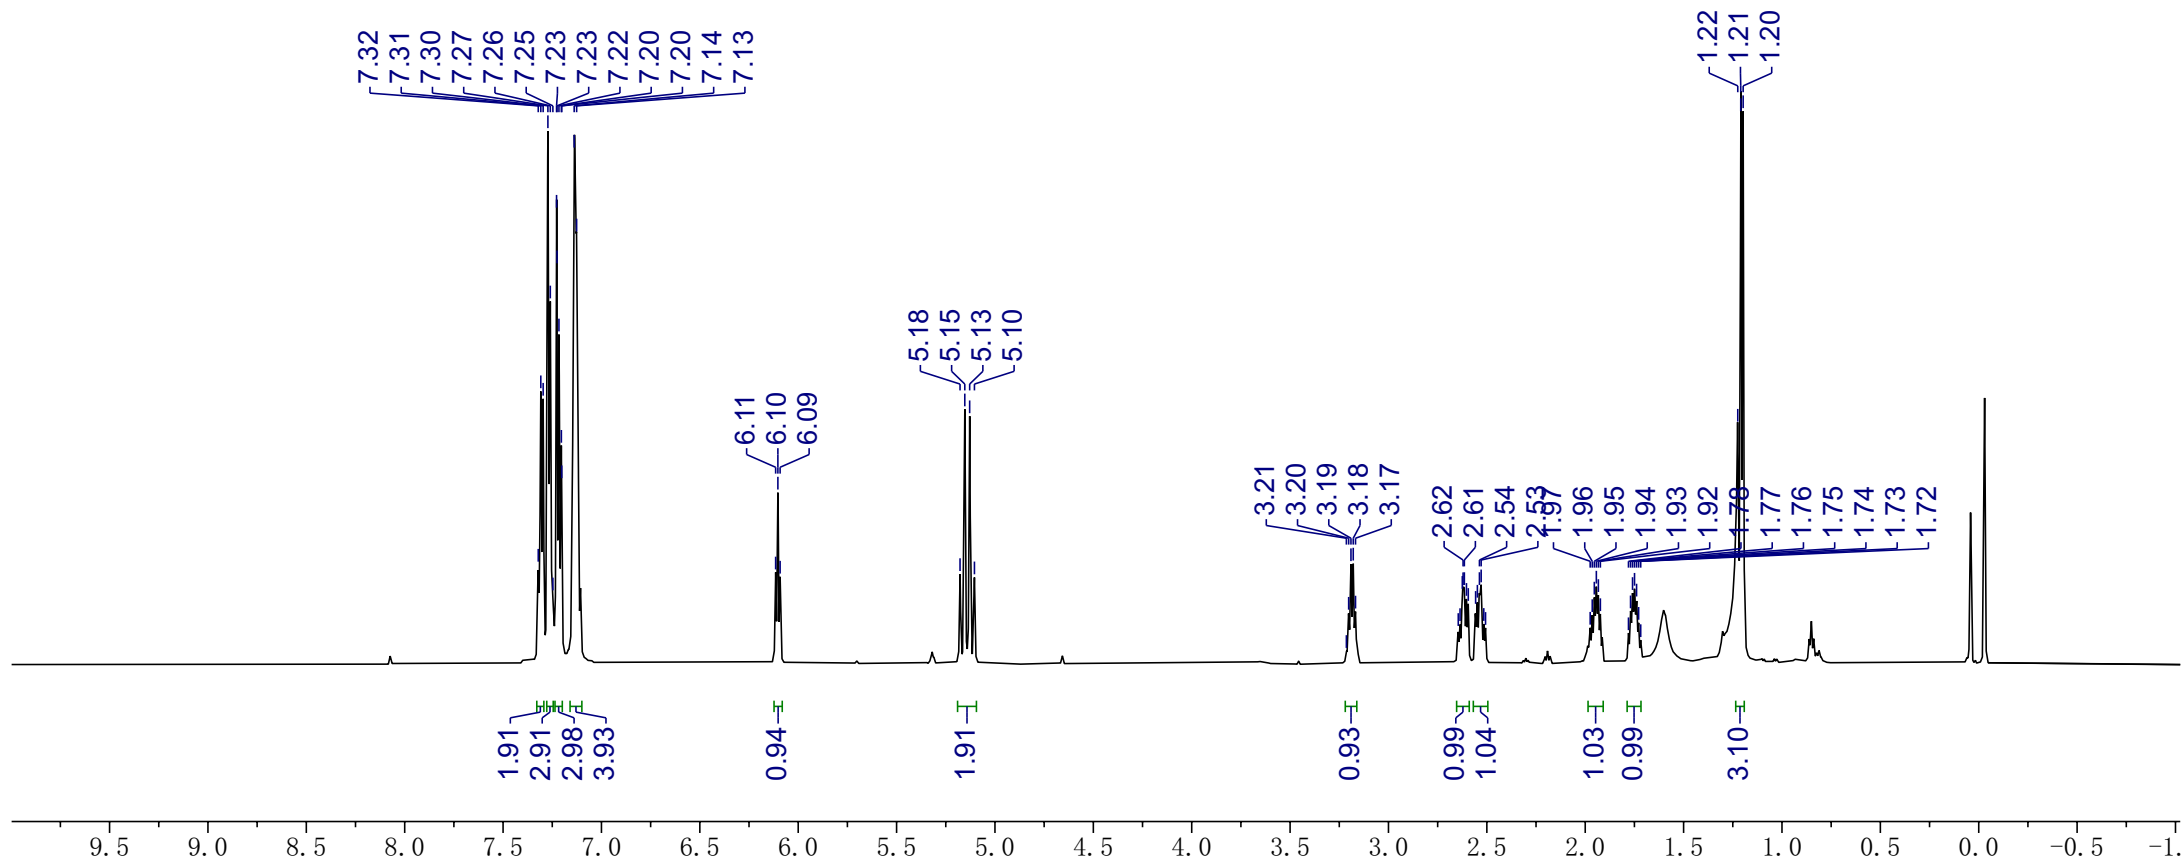



400 MHz, CDCl<sub>3</sub>

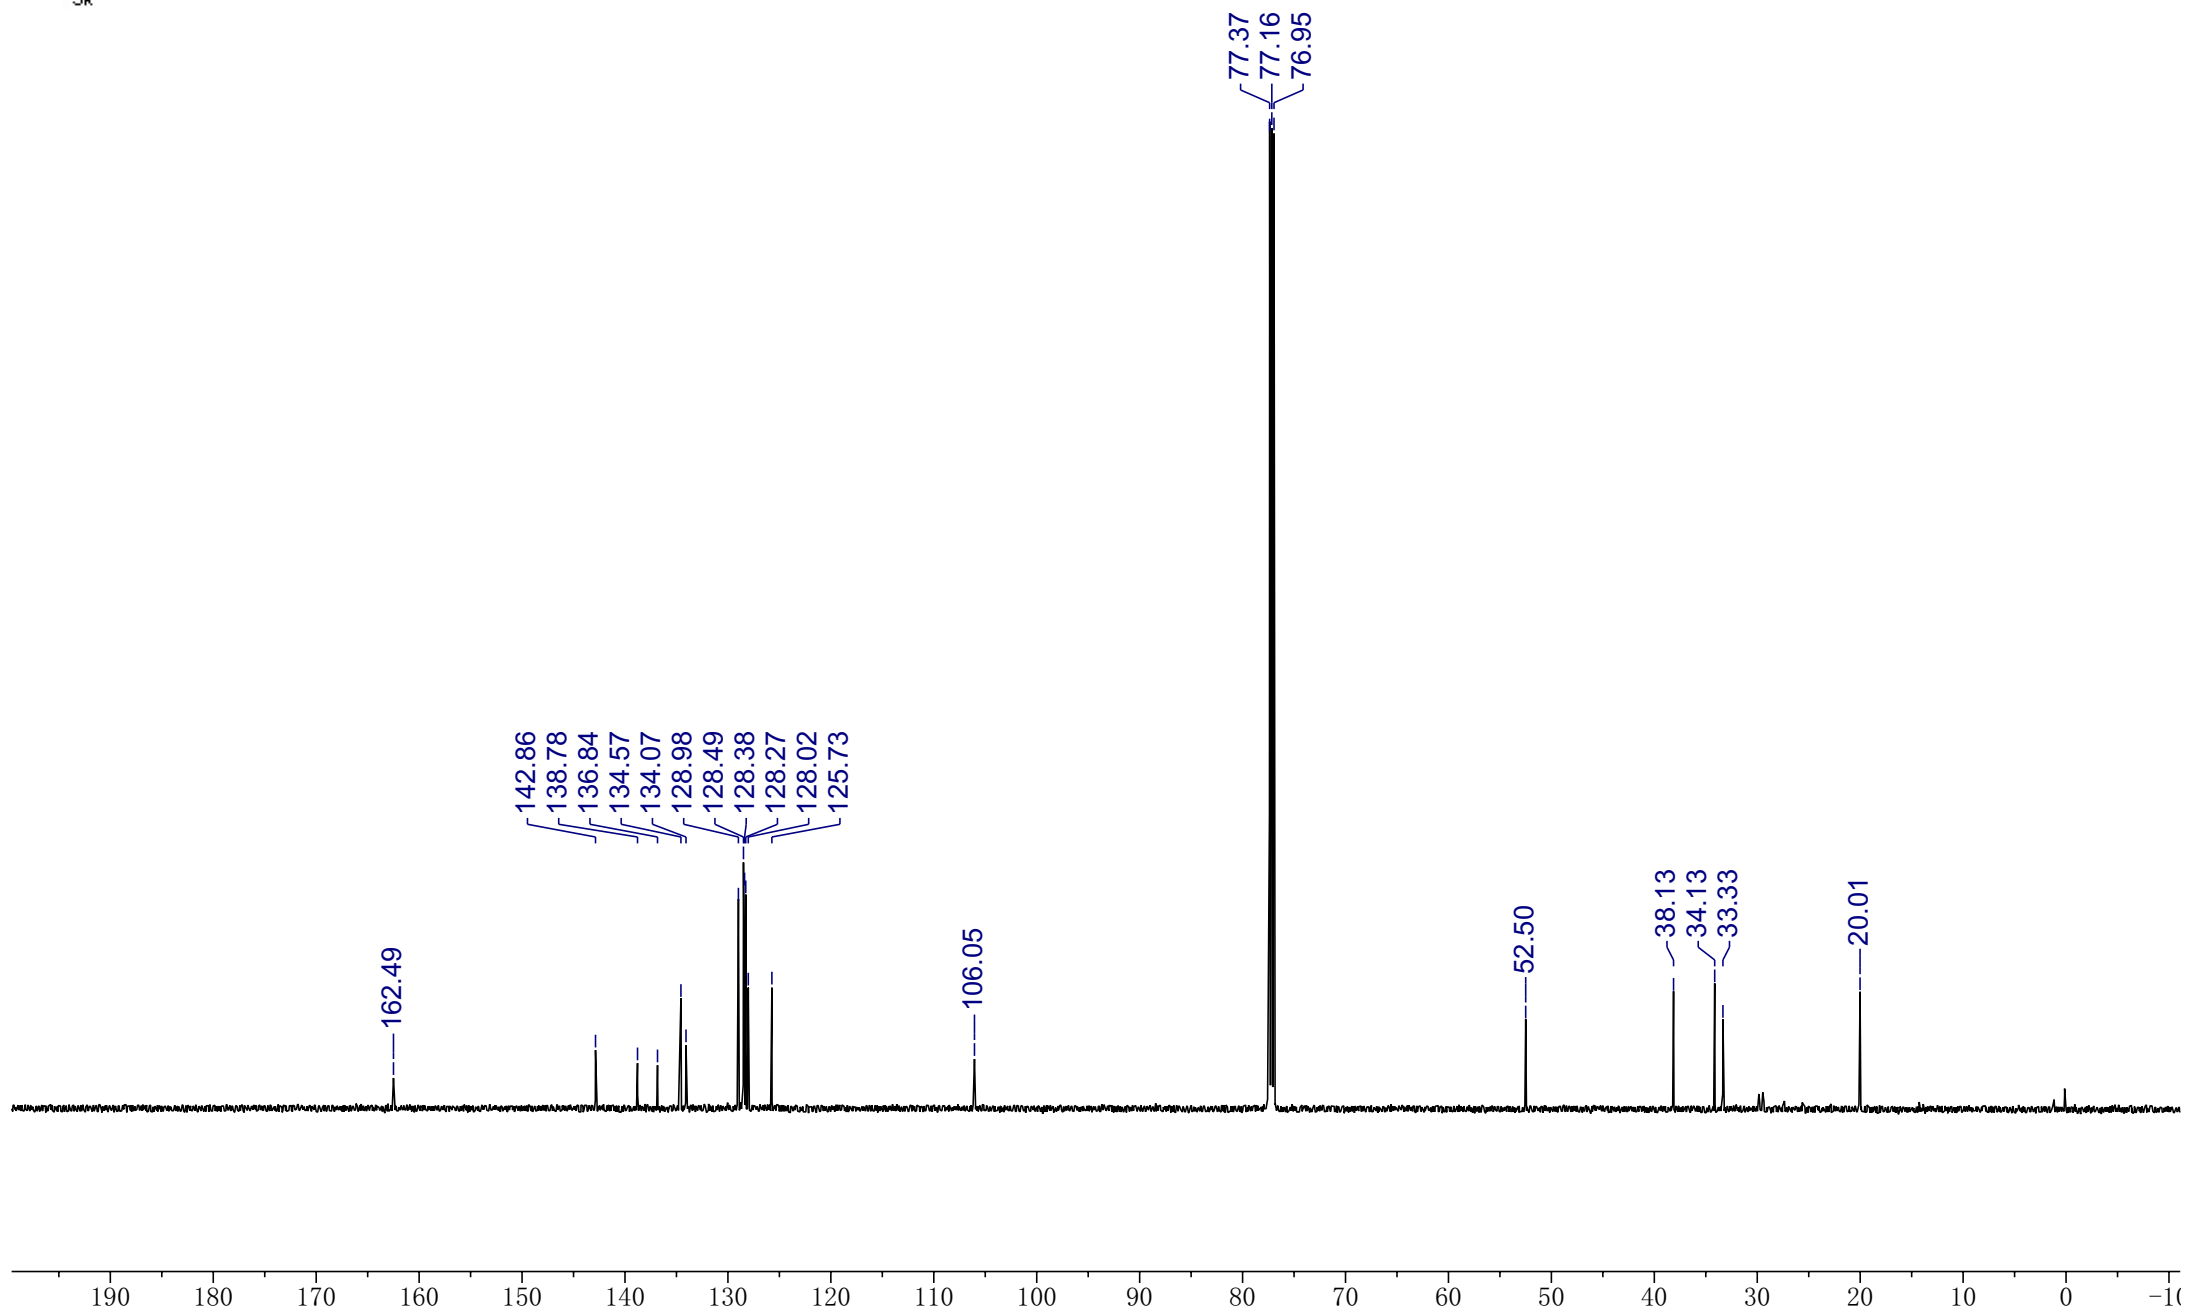



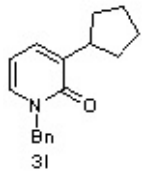

400 MHz, CDCl<sub>3</sub>

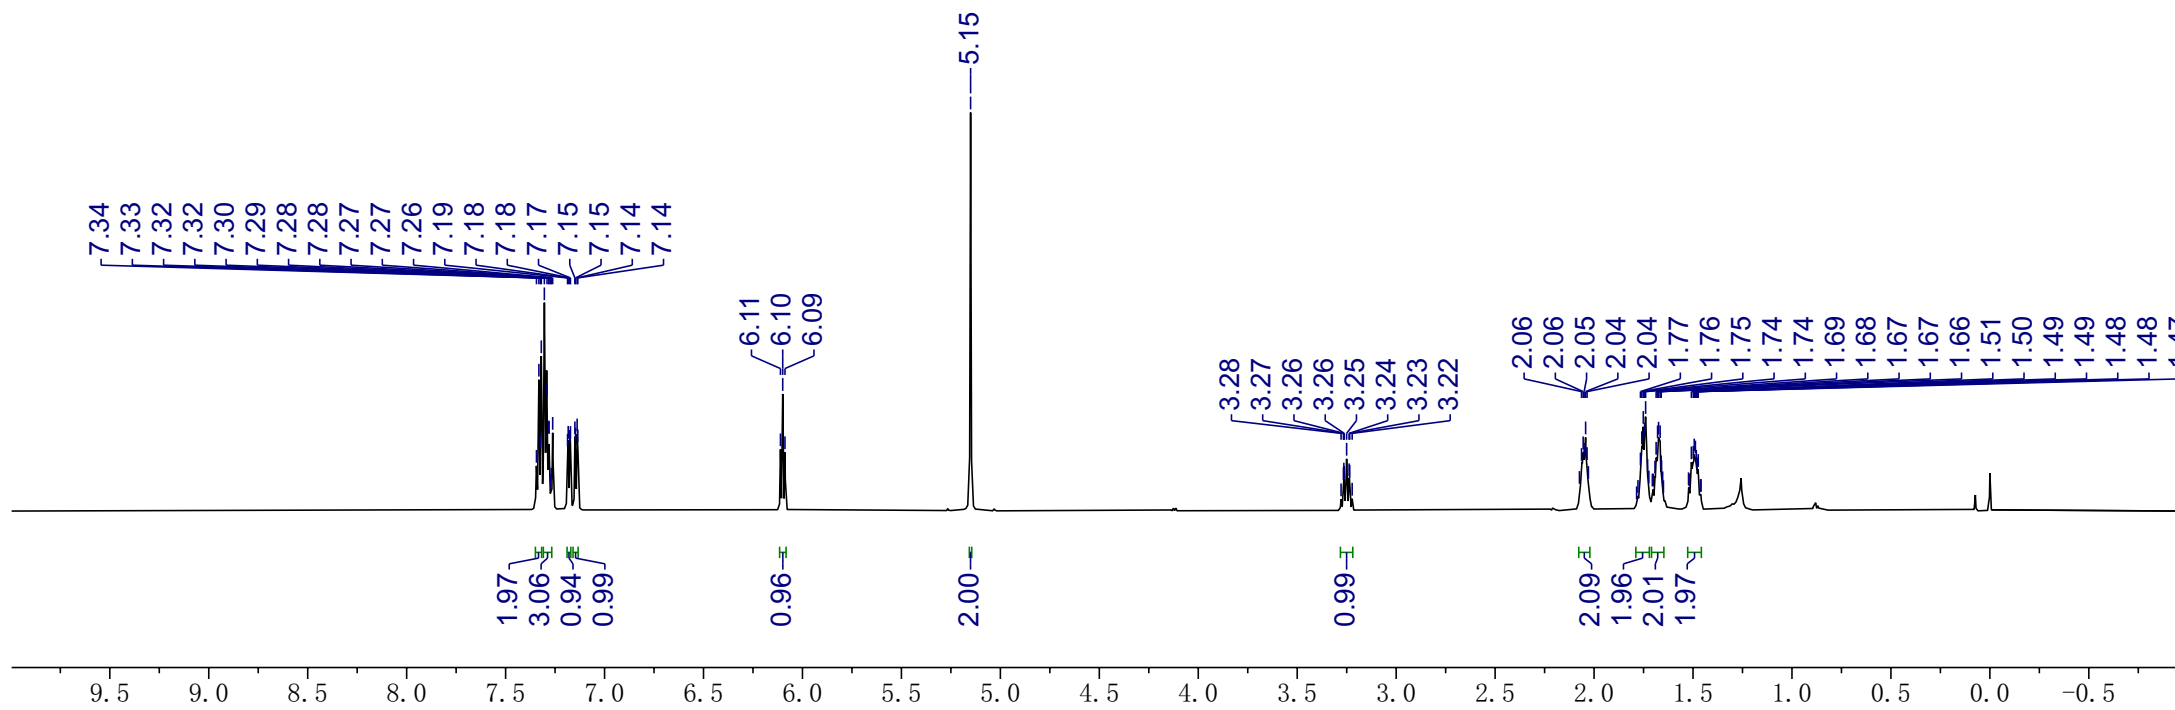



400 MHz, CDCl<sub>3</sub>

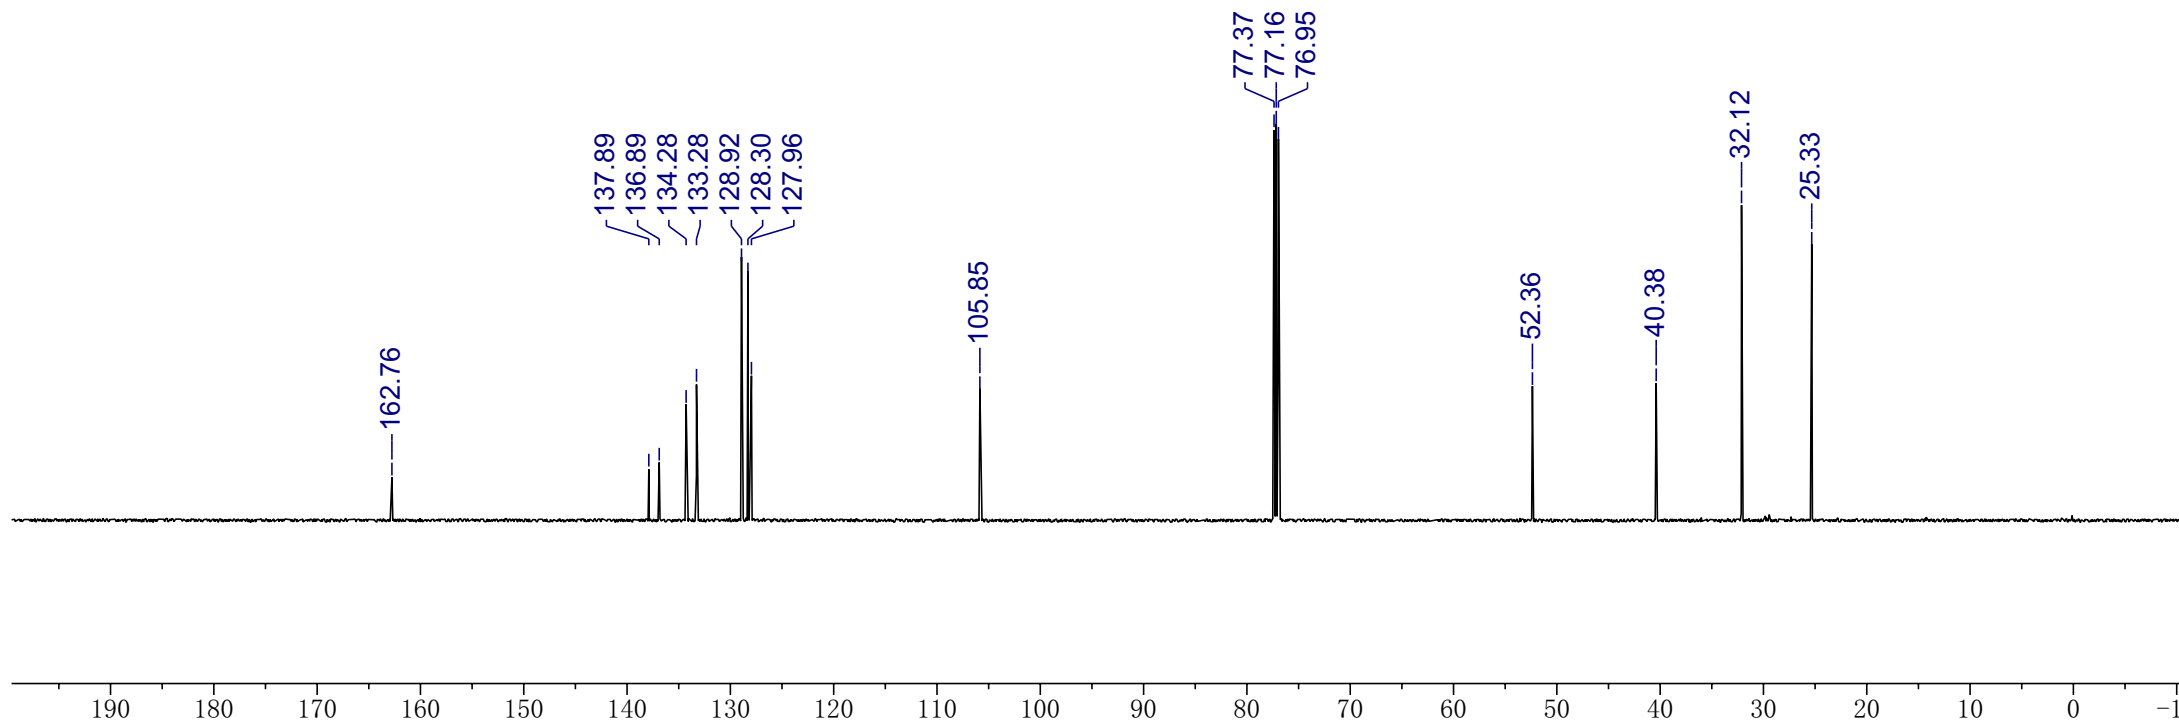

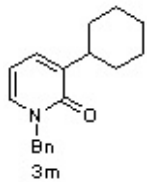

400 MHz, CDCl<sub>3</sub>

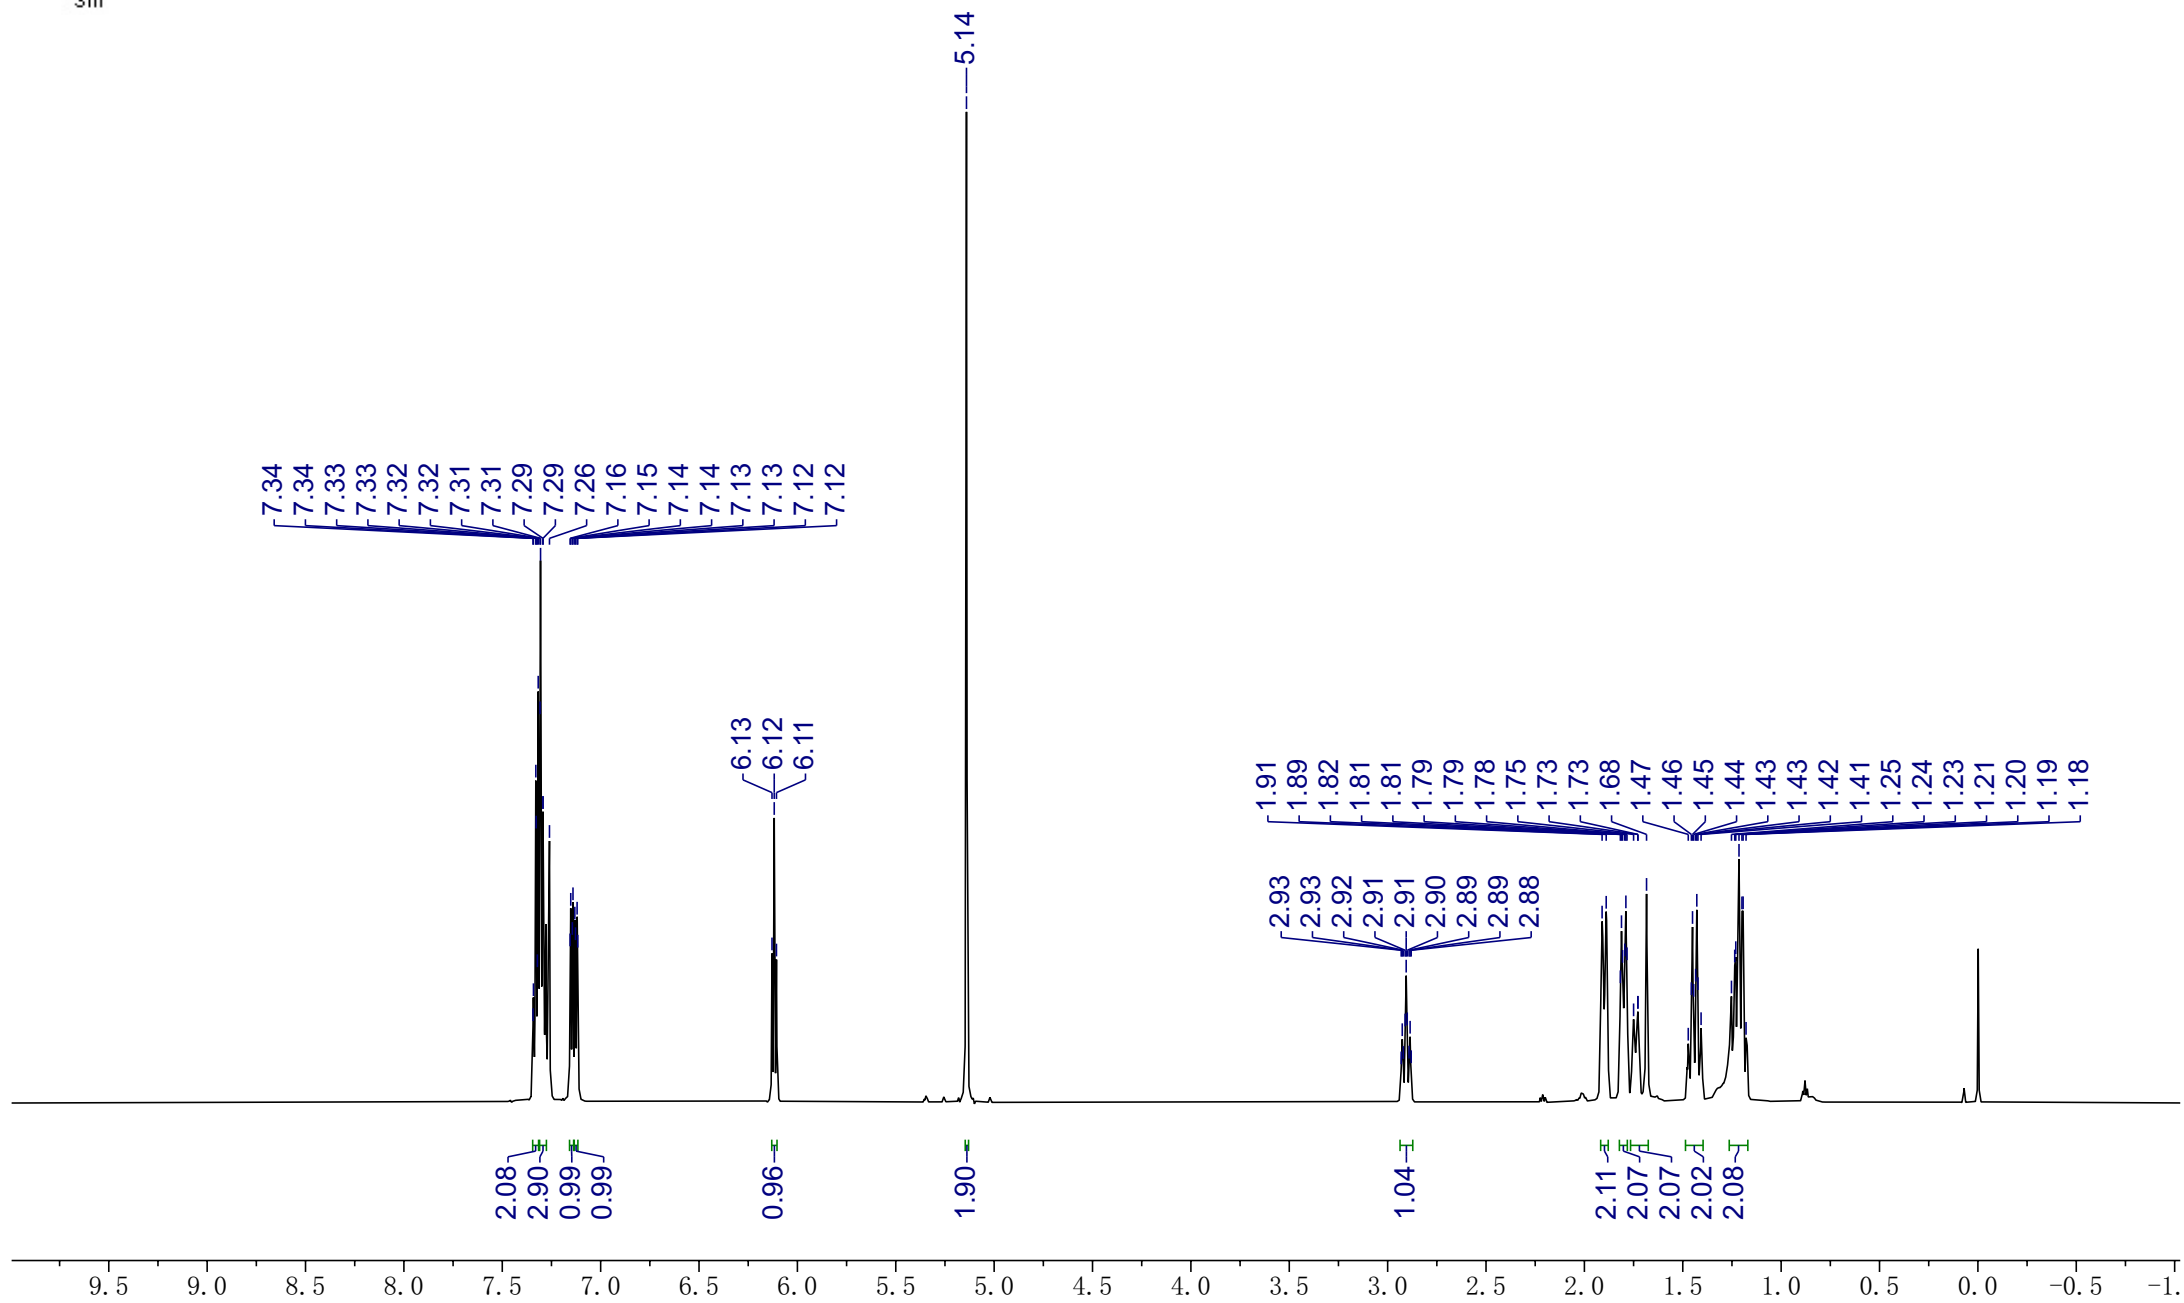



400 MHz, CDCl<sub>3</sub>

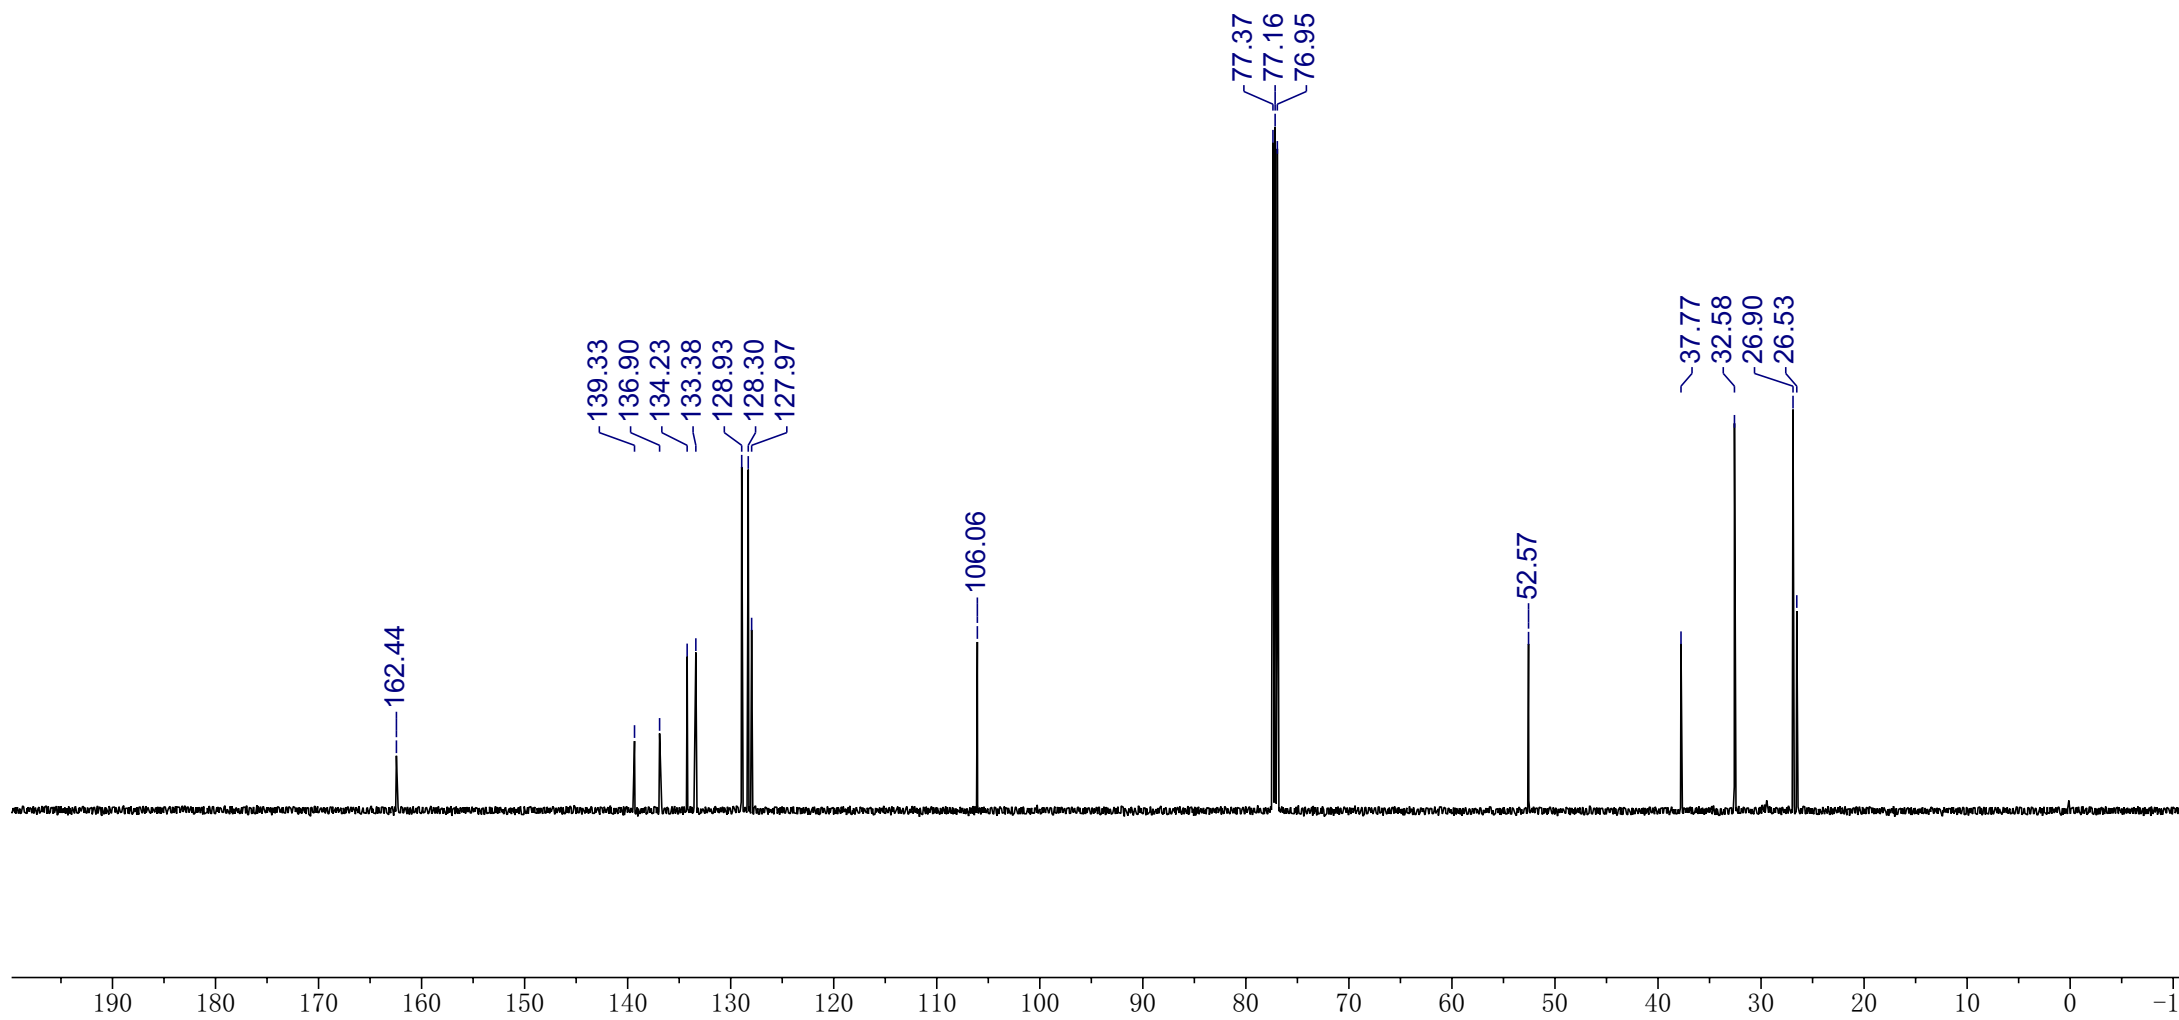

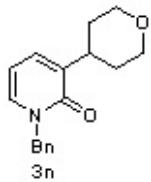

400 MHz, CDCl<sub>3</sub>

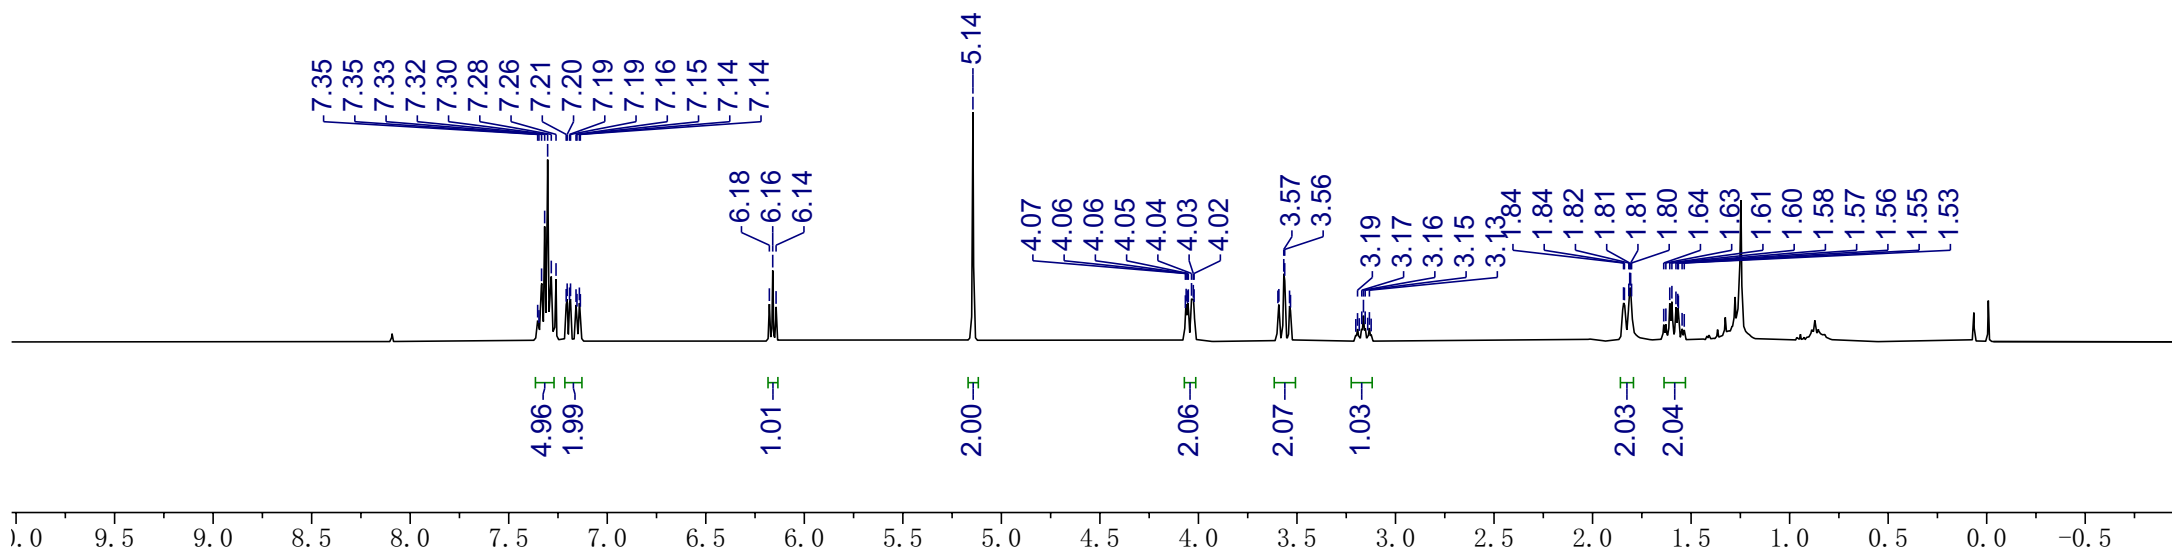



400 MHz, CDCl<sub>3</sub>

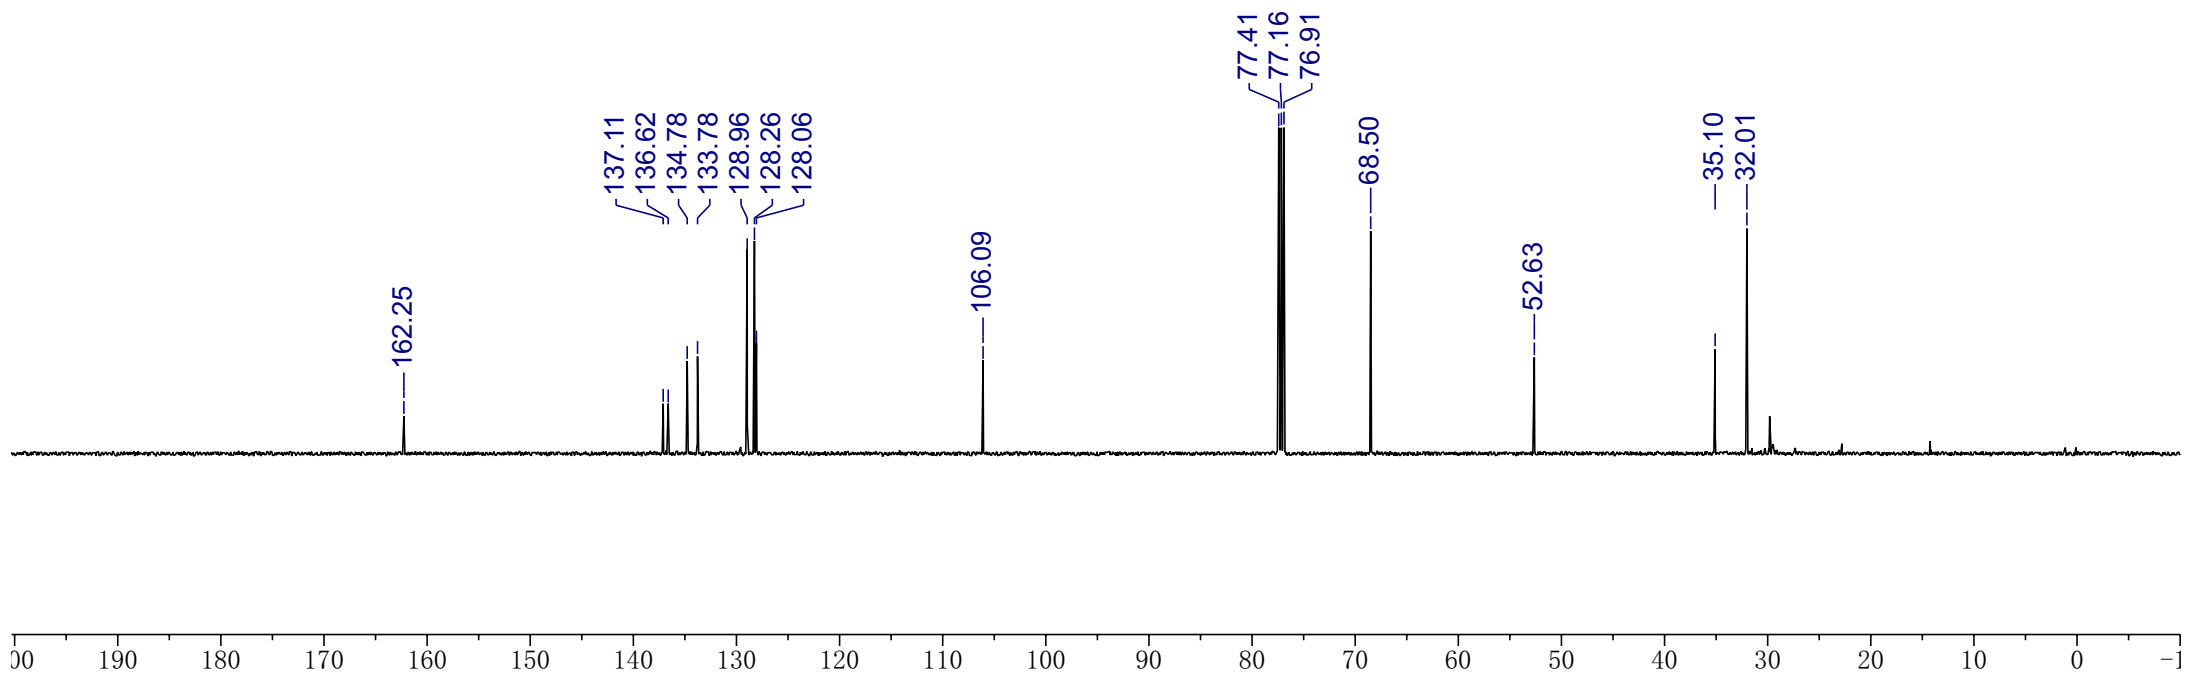

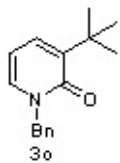

400 MHz, CDCl<sub>3</sub>

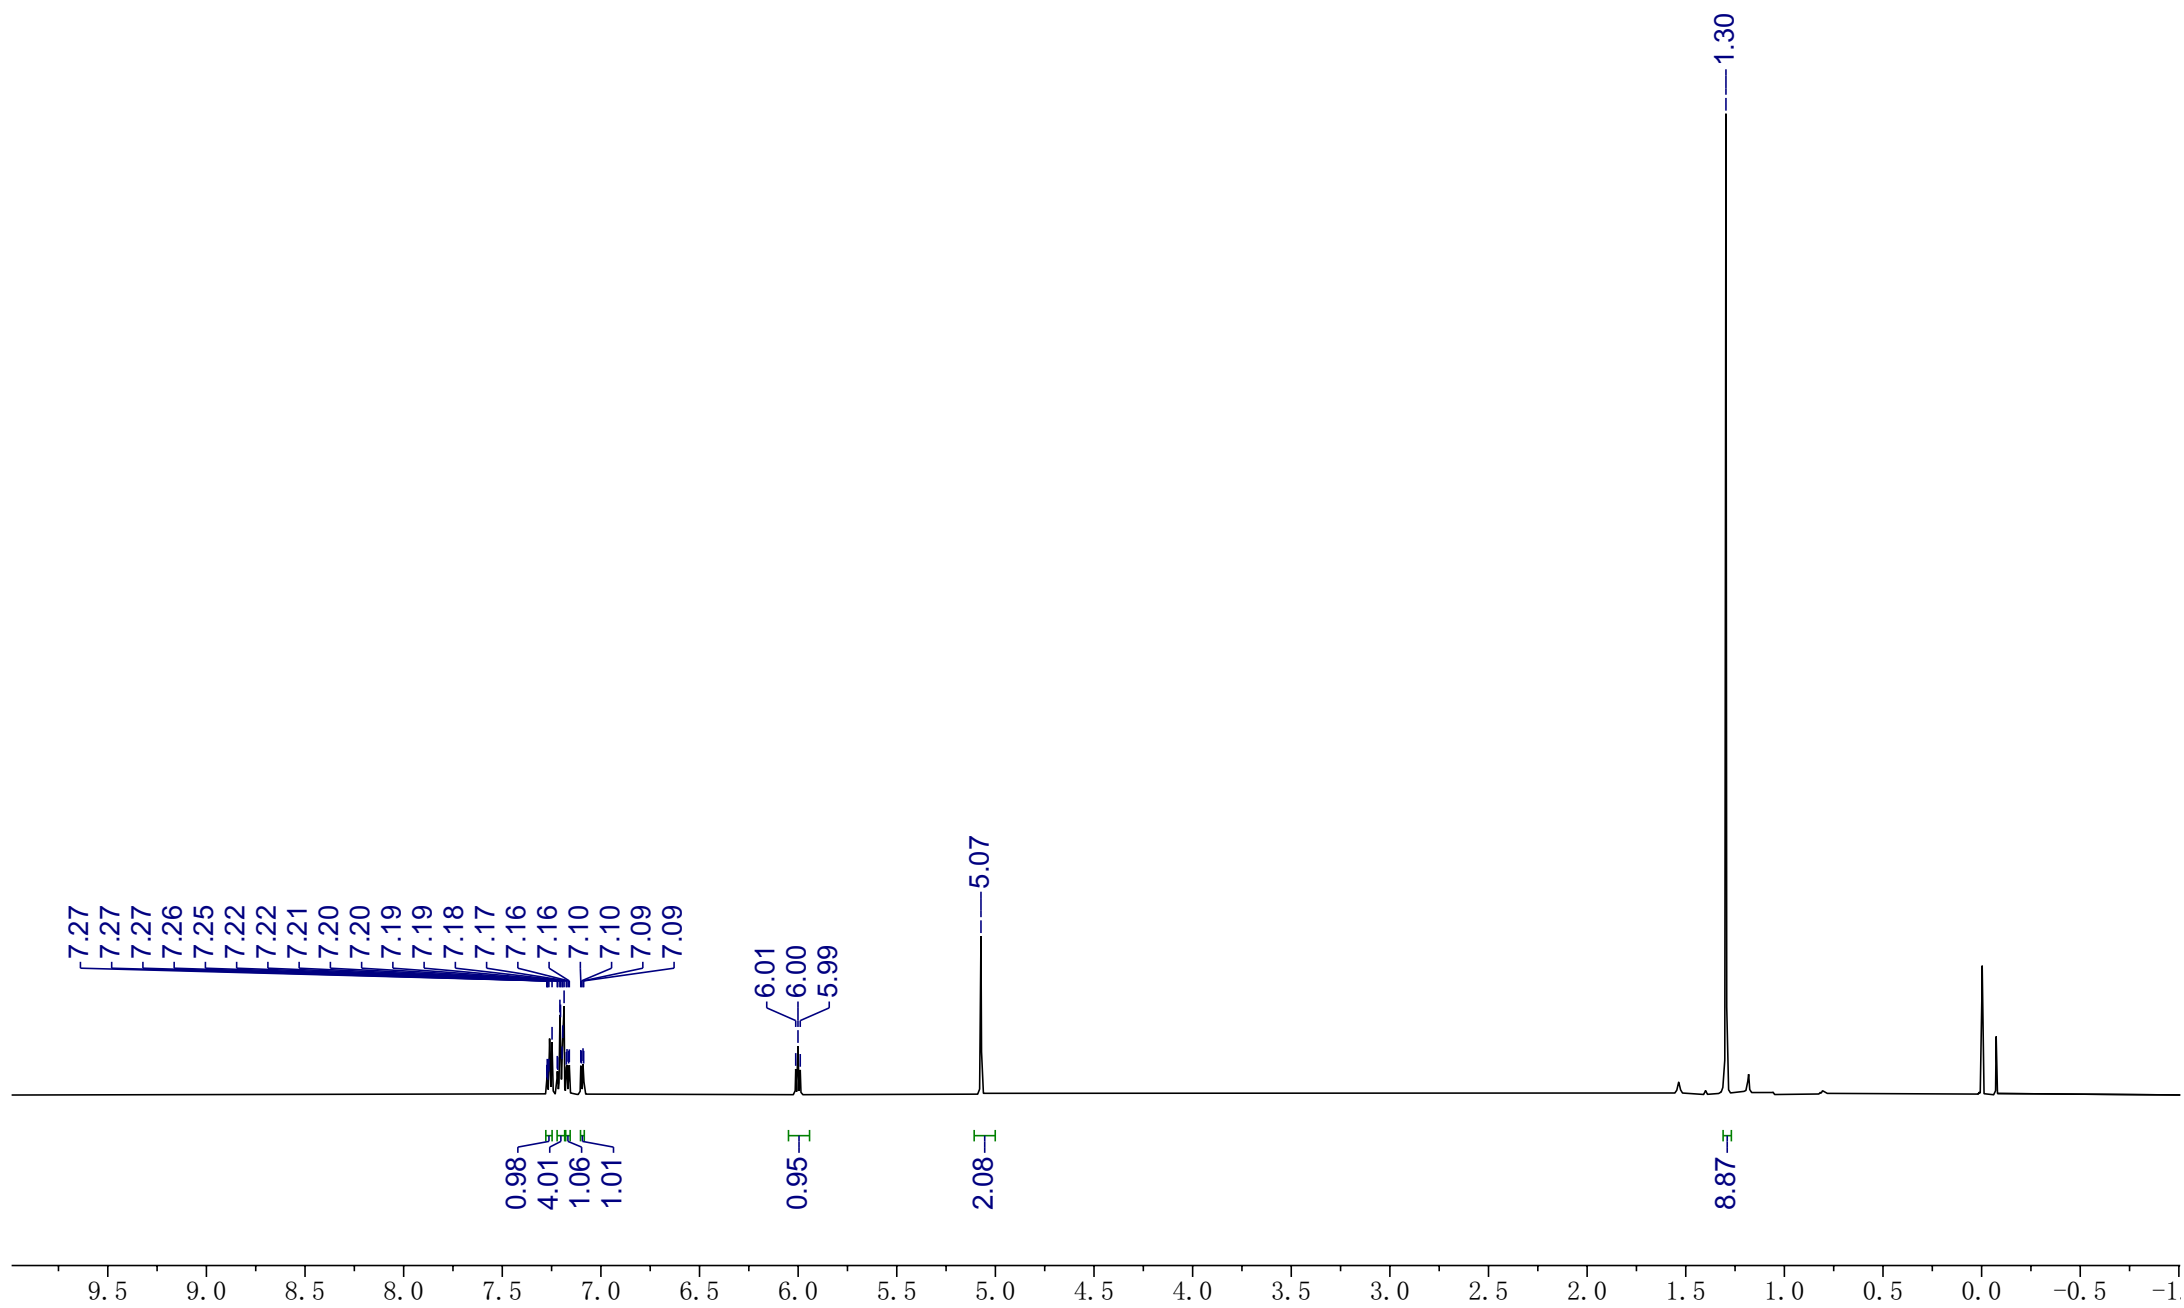



400 MHz, CDCl<sub>3</sub>

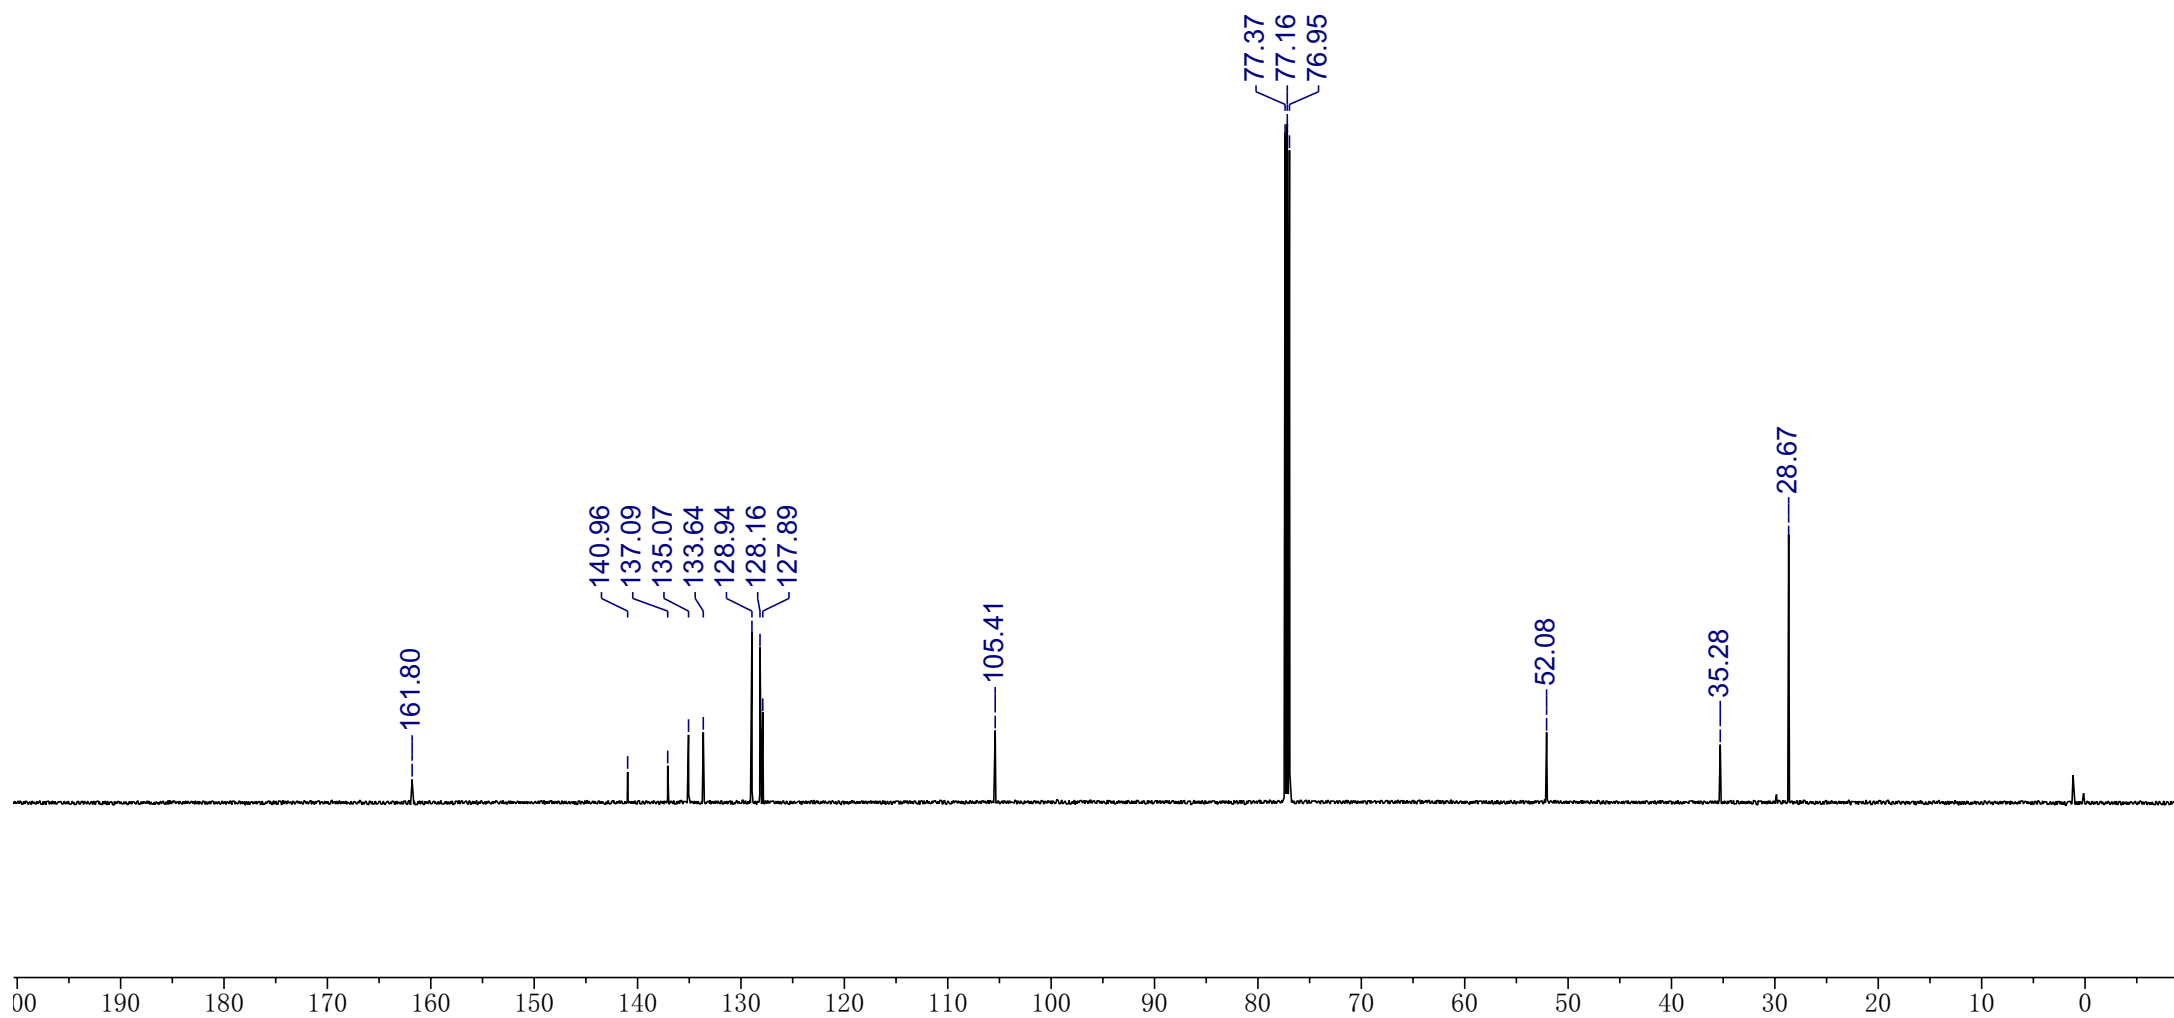



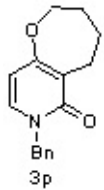

400 MHz, CDCl<sub>3</sub>

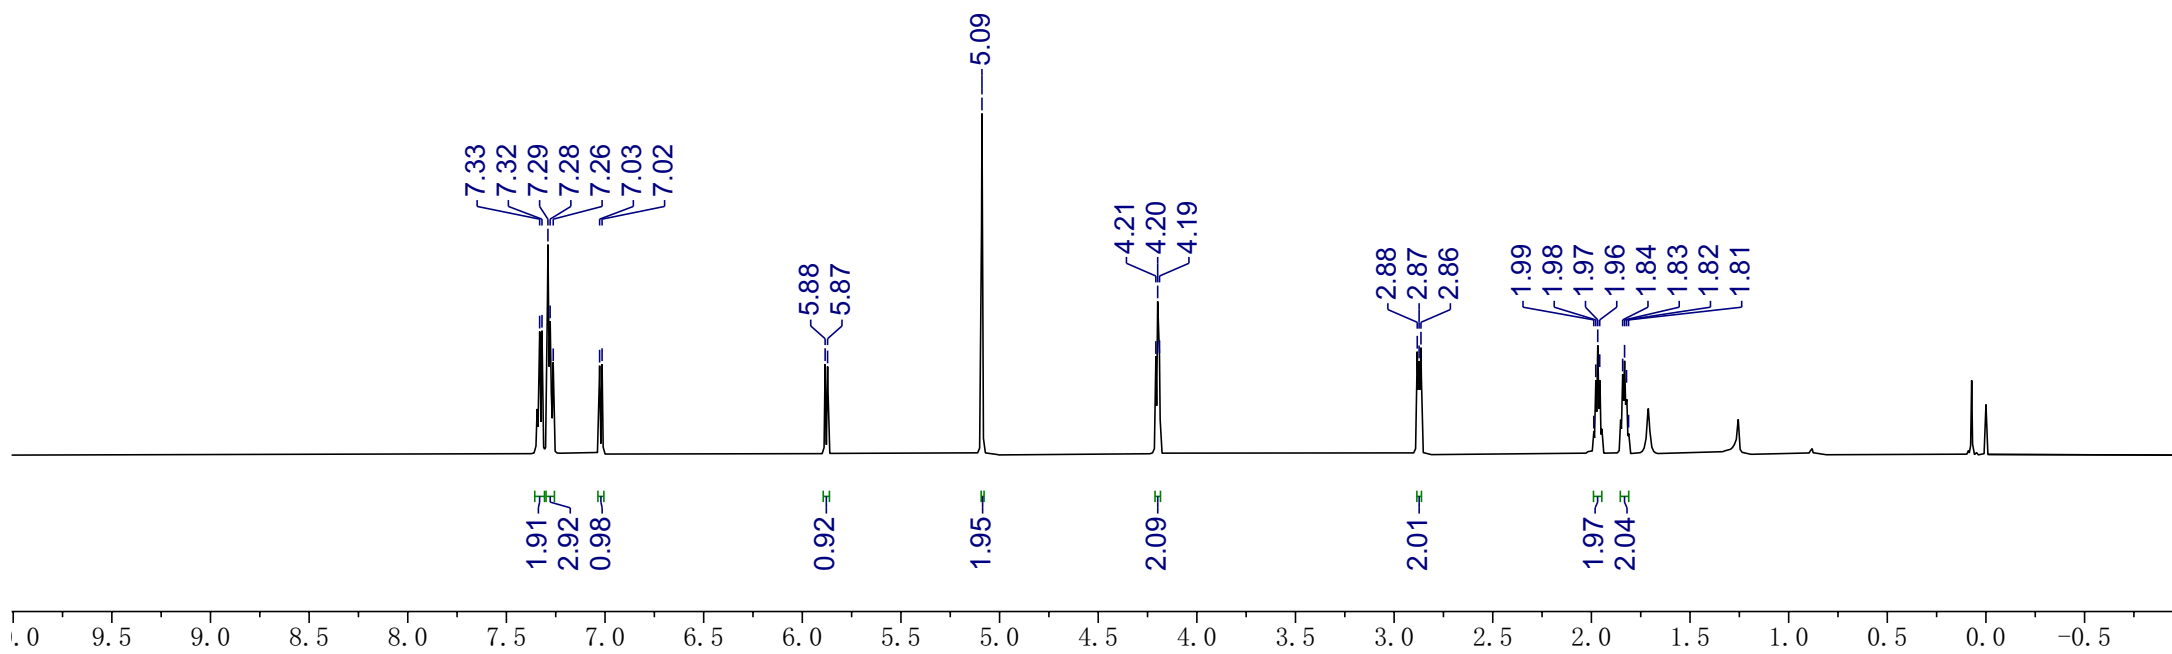

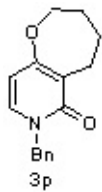

400 MHz, CDCl<sub>3</sub>

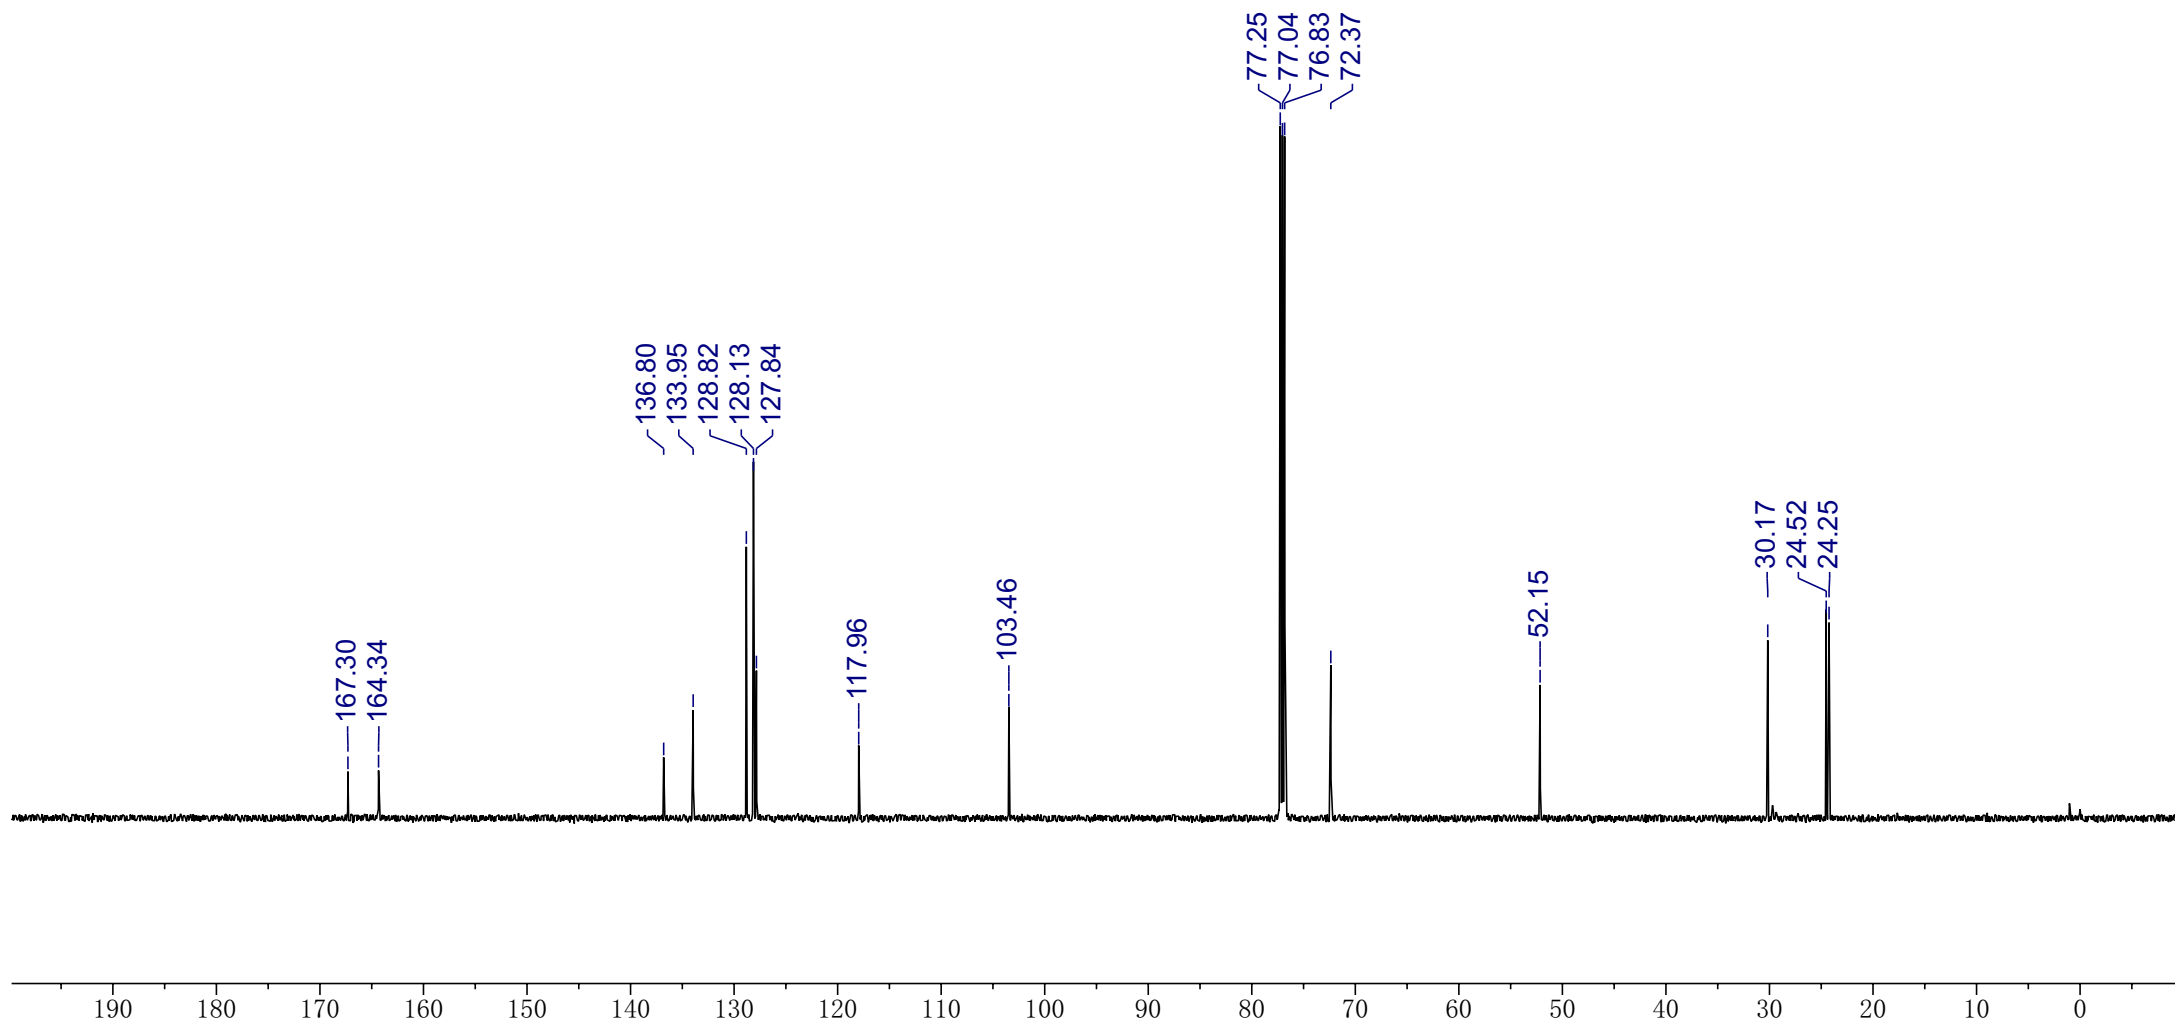

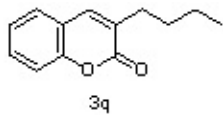

400 MHz, CDCl<sub>3</sub>

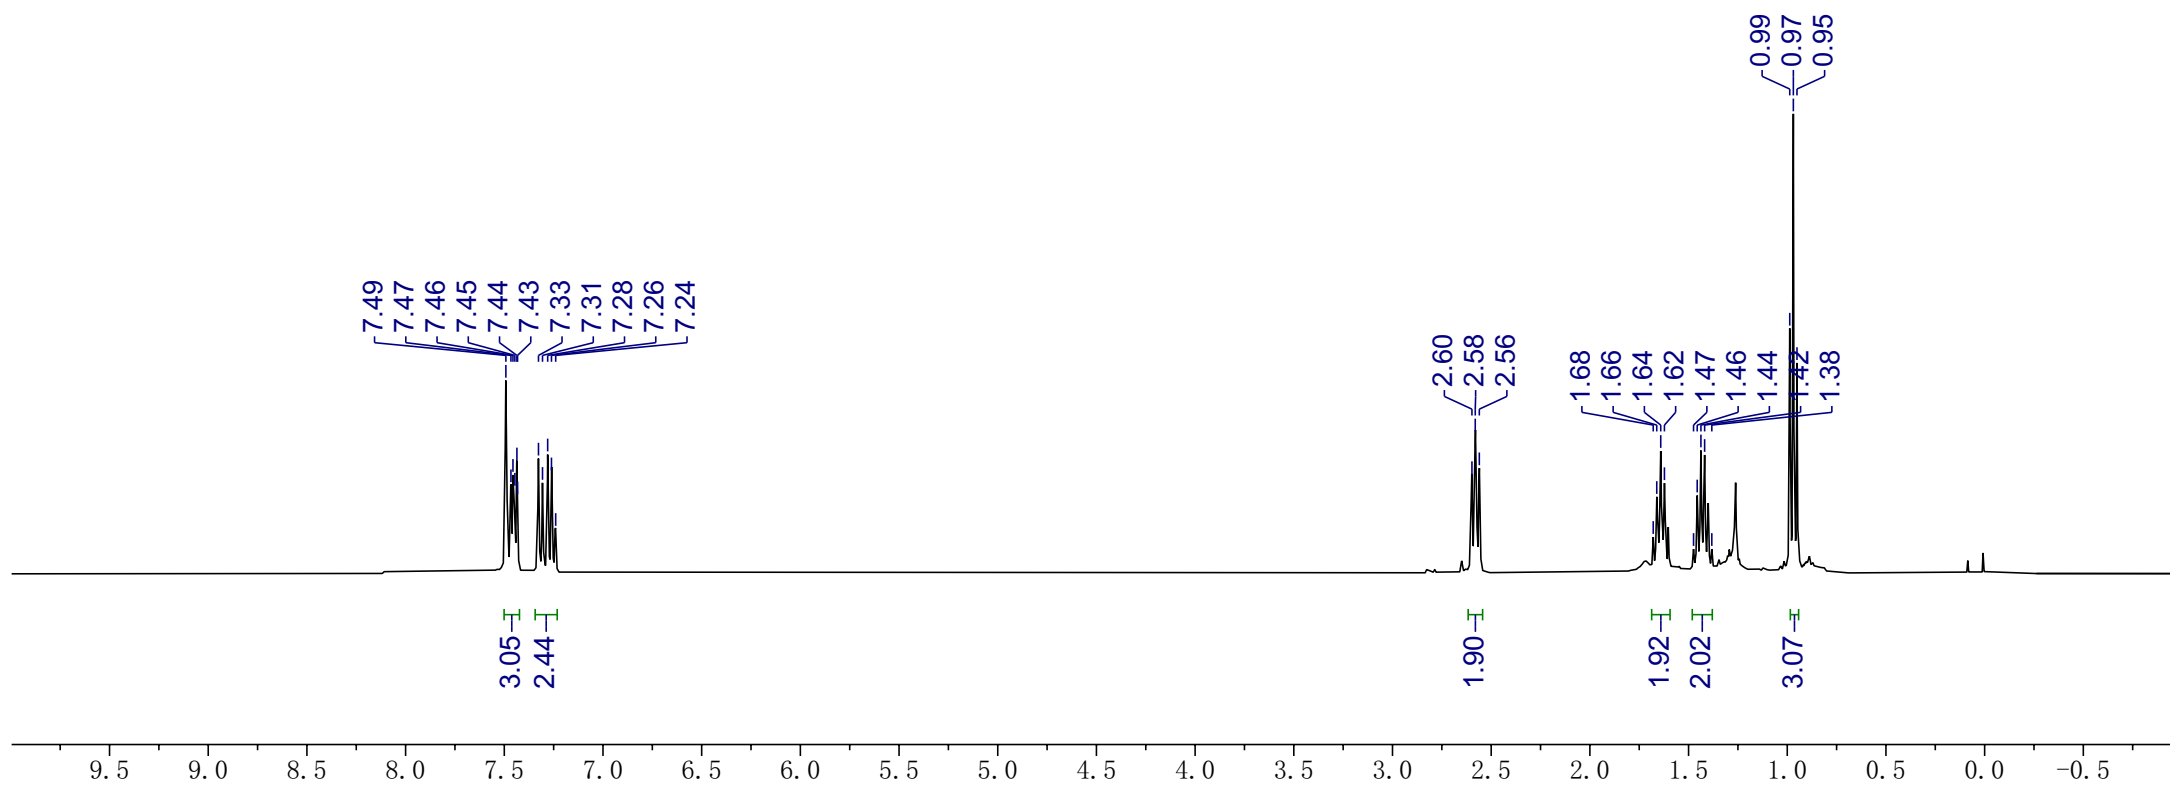

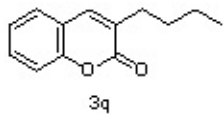

400 MHz, CDCl<sub>3</sub>

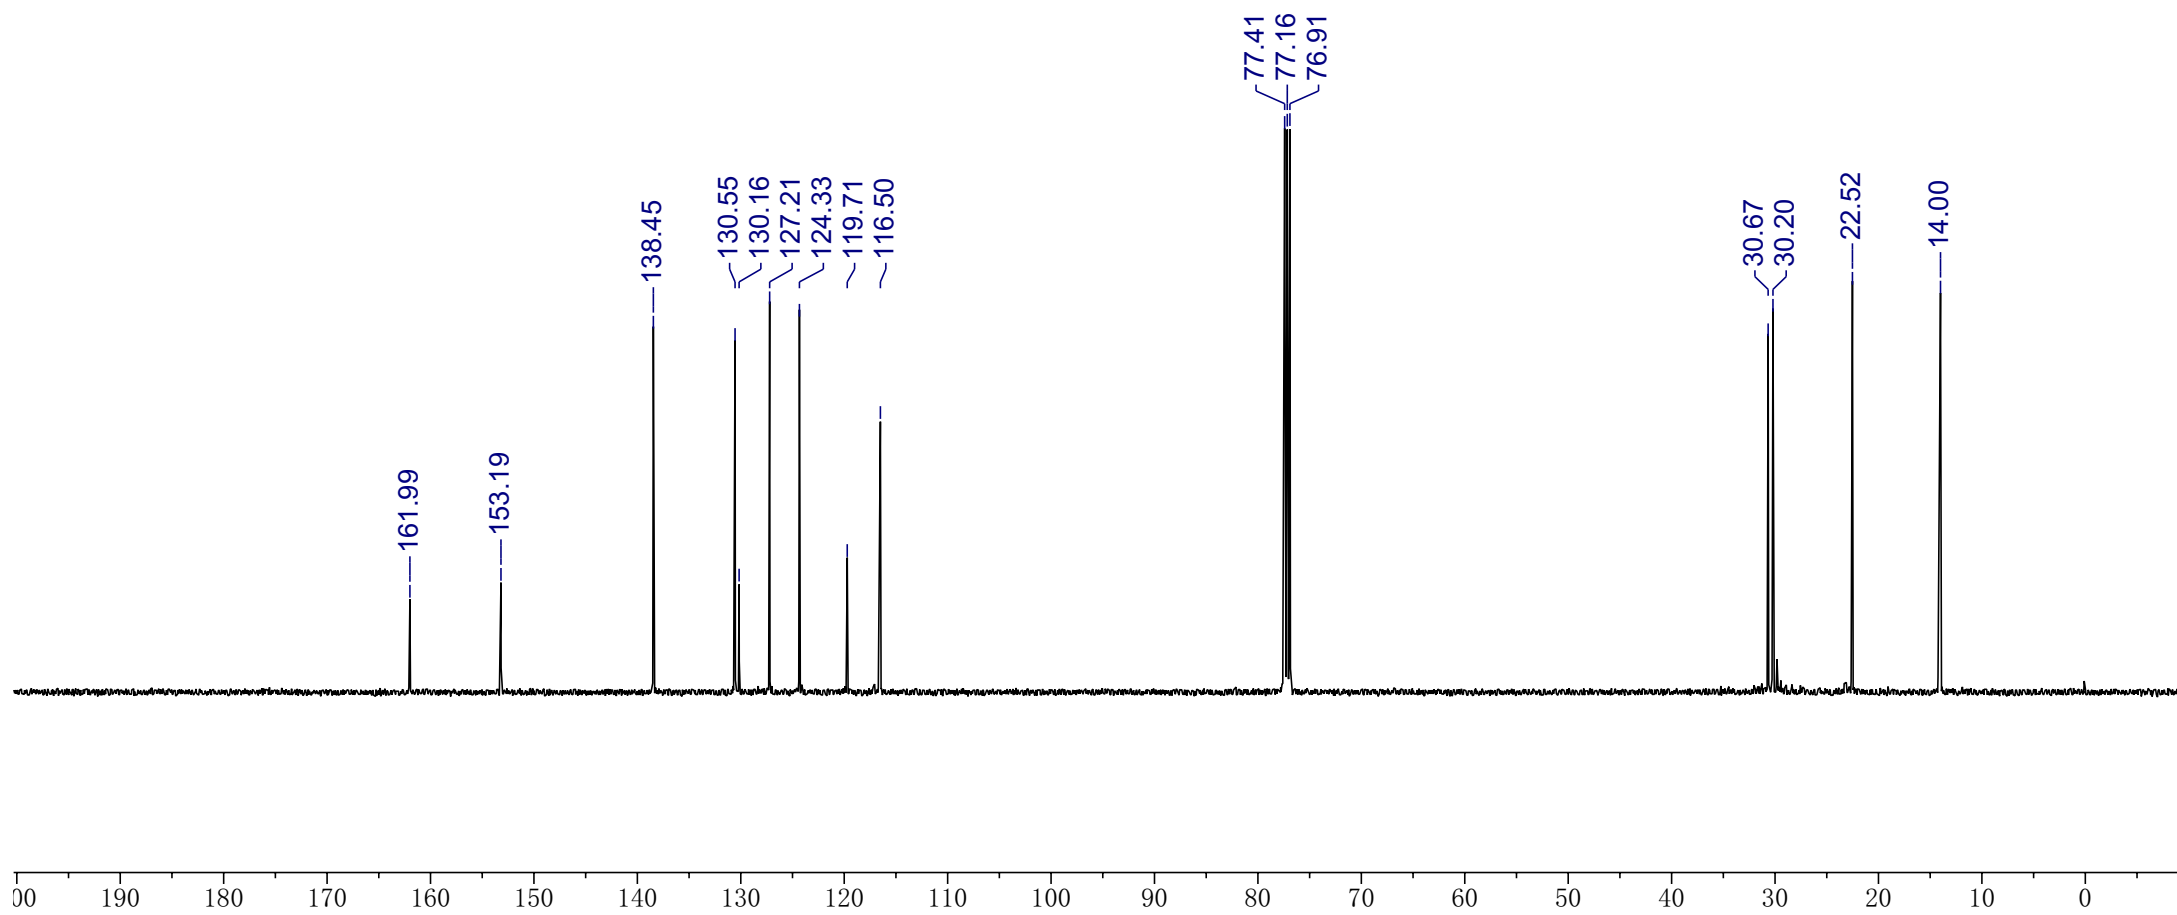

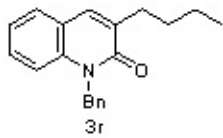

400 MHz, CDCl<sub>3</sub>

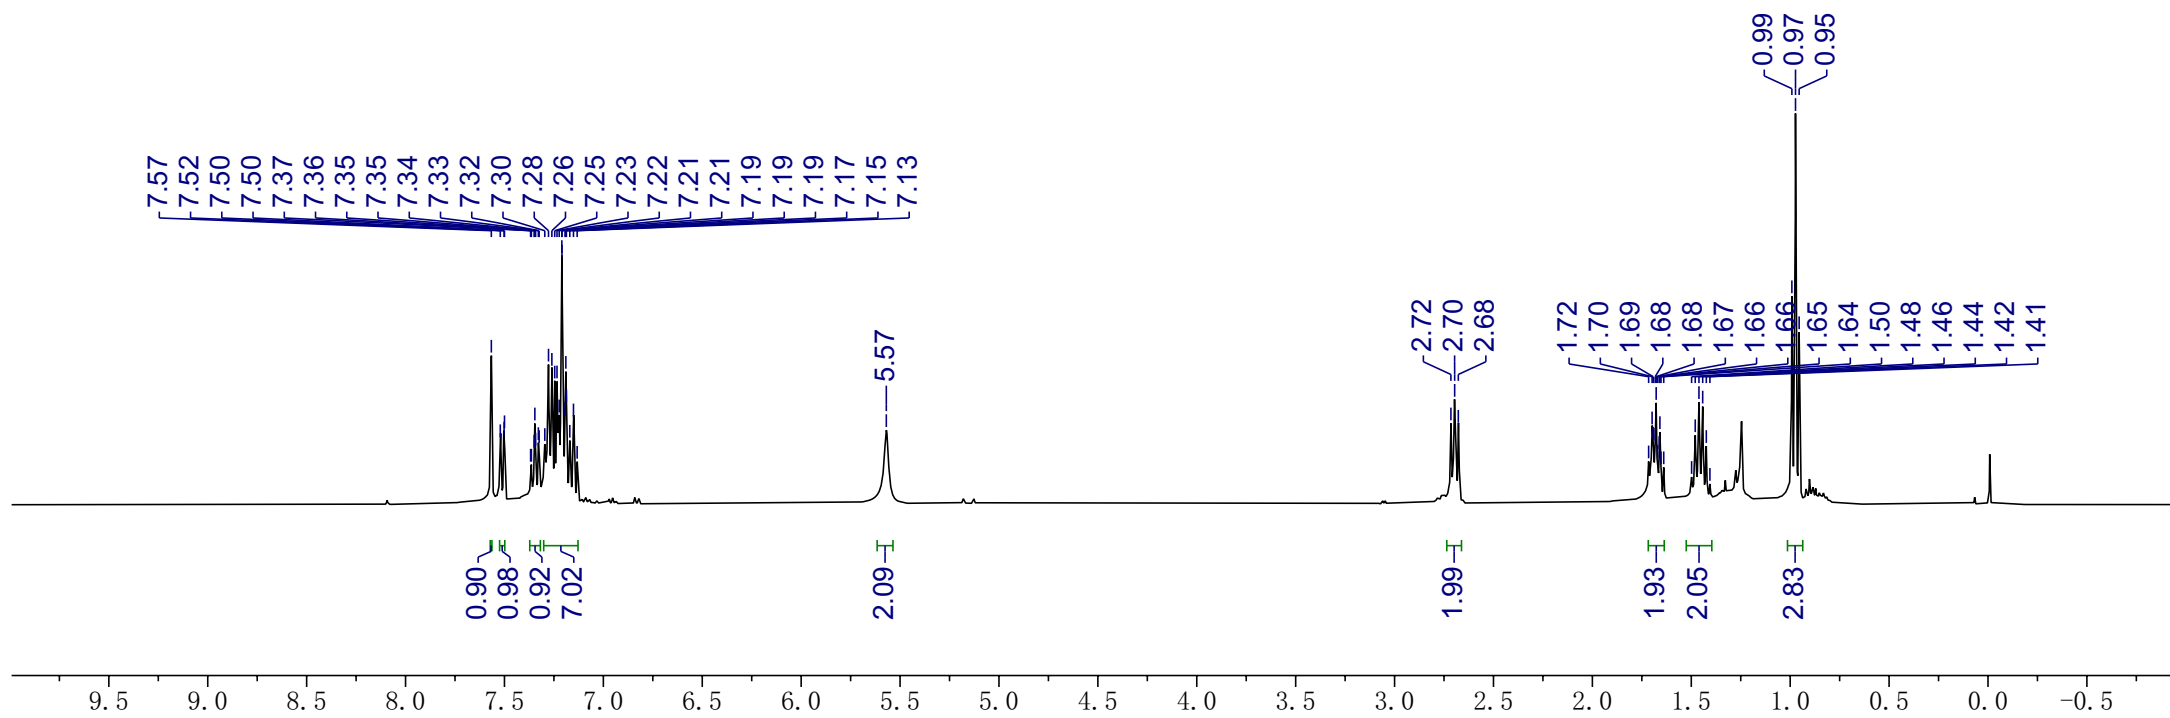



400 MHz, CDCl<sub>3</sub>

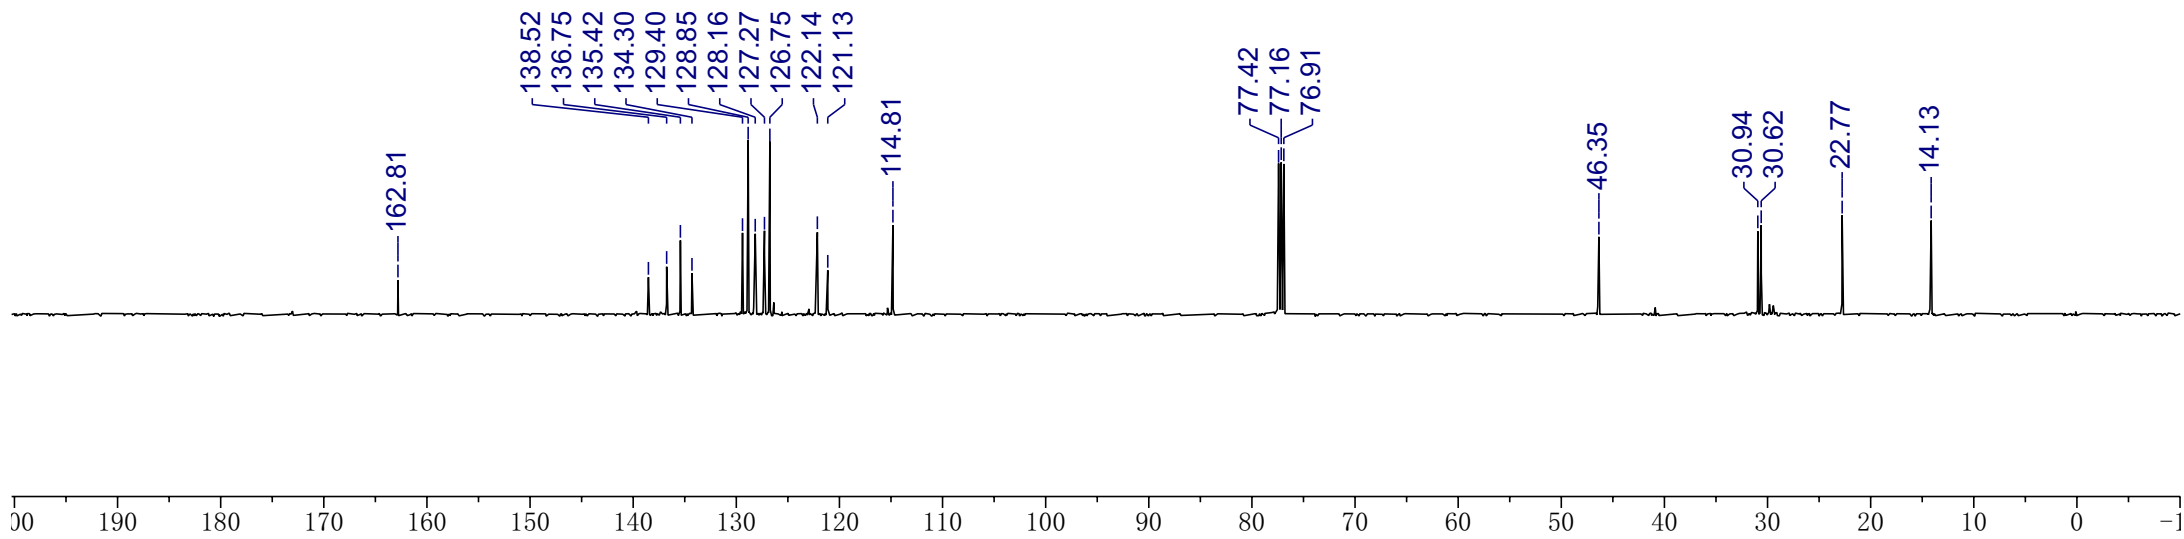

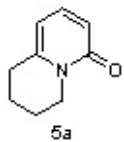

400 MHz, CDCl<sub>3</sub>

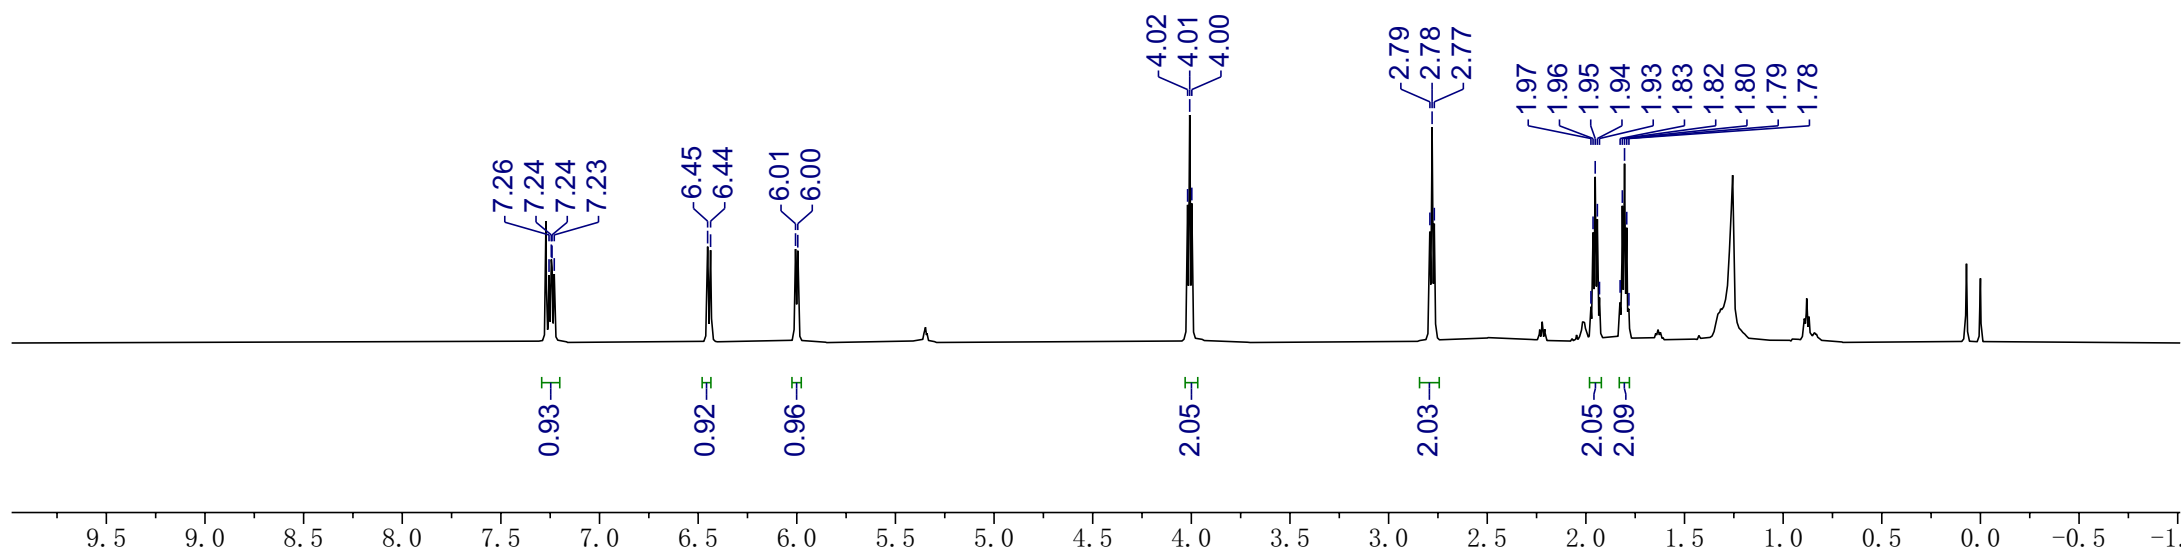

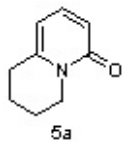

400 MHz, CDCl<sub>3</sub>

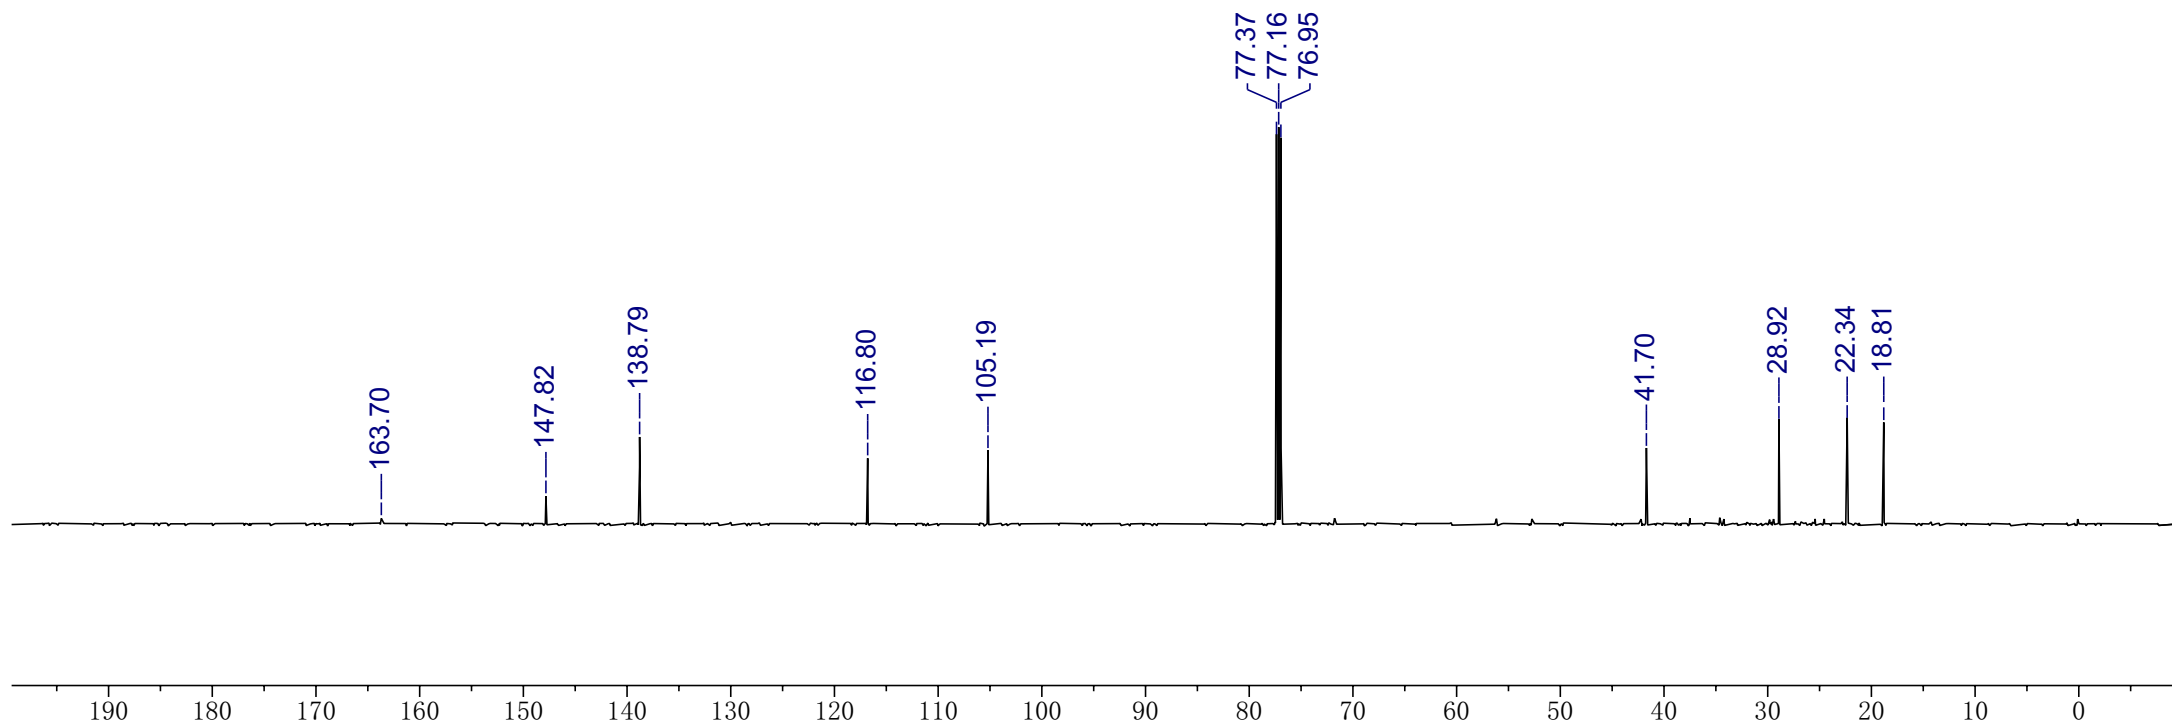



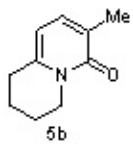

400 MHz, CDCl<sub>3</sub>

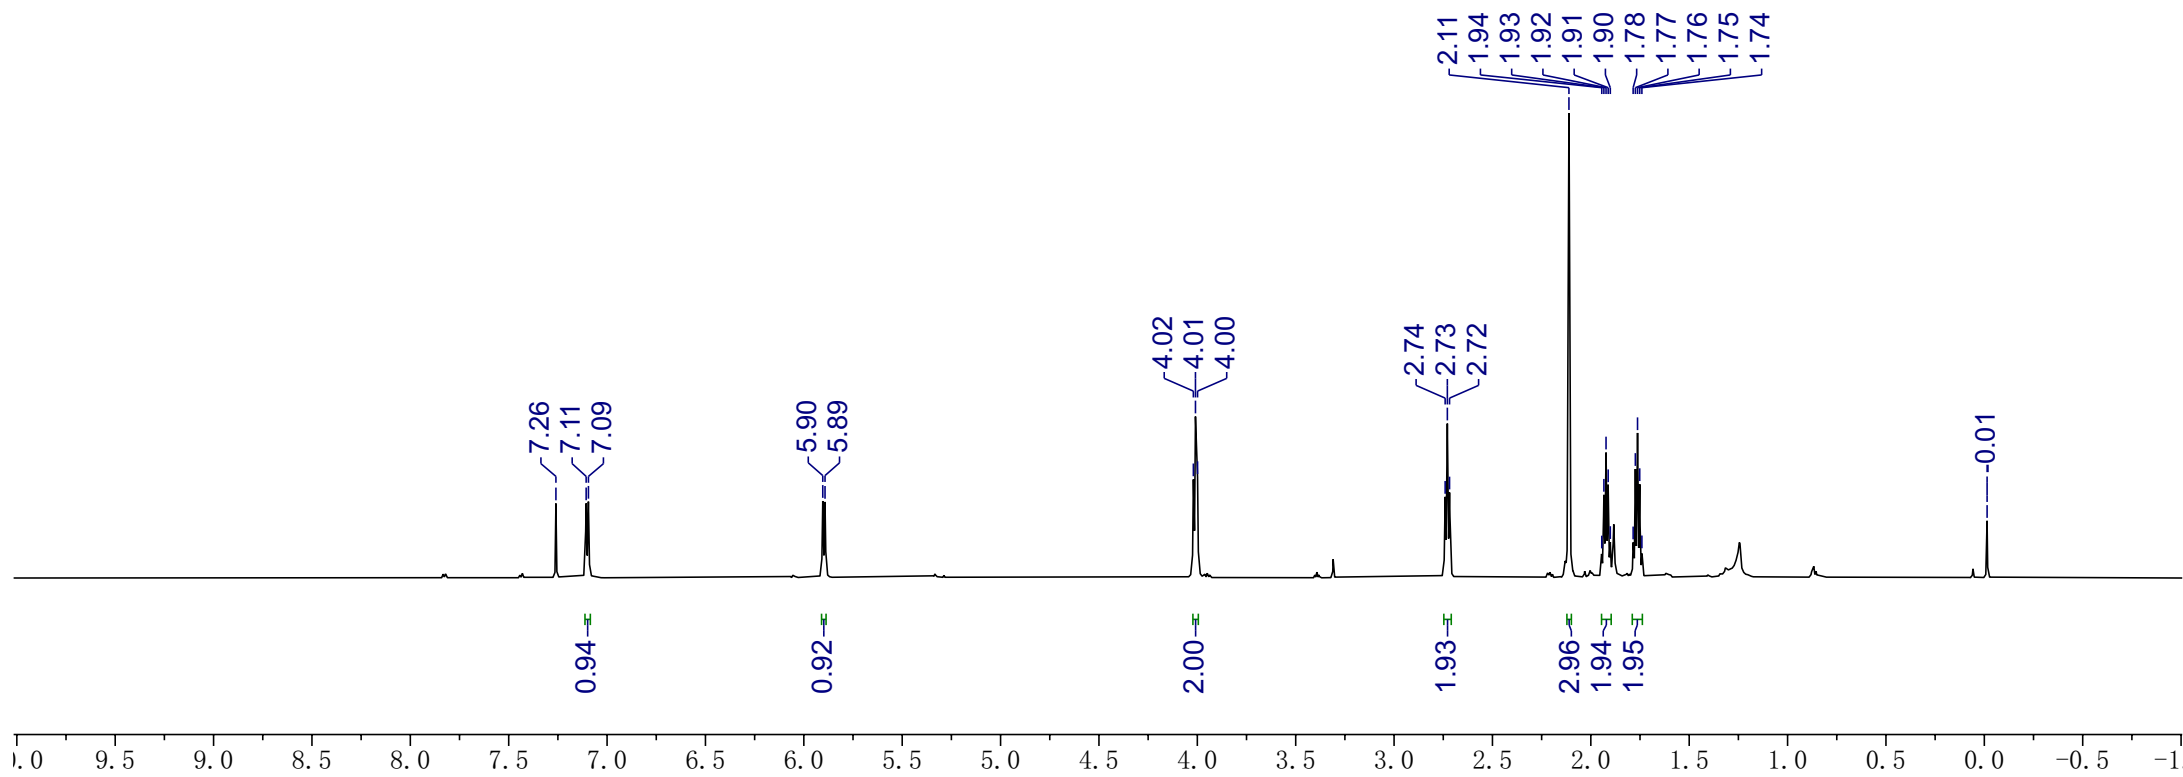

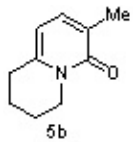

400 MHz, CDCl<sub>3</sub>

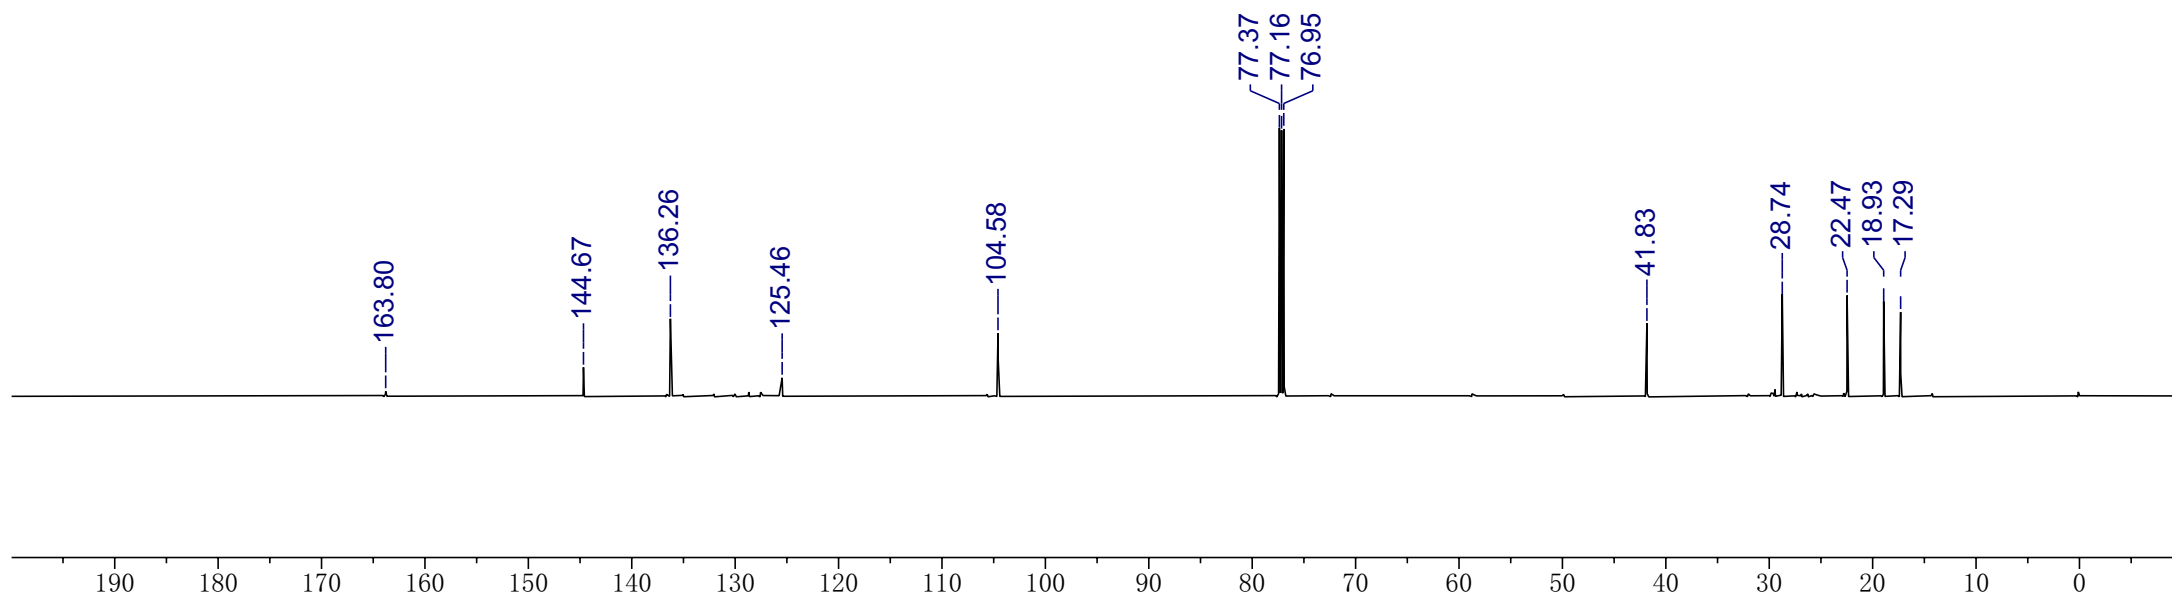

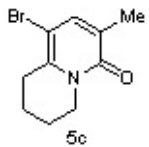

400 MHz, CDCl<sub>3</sub>

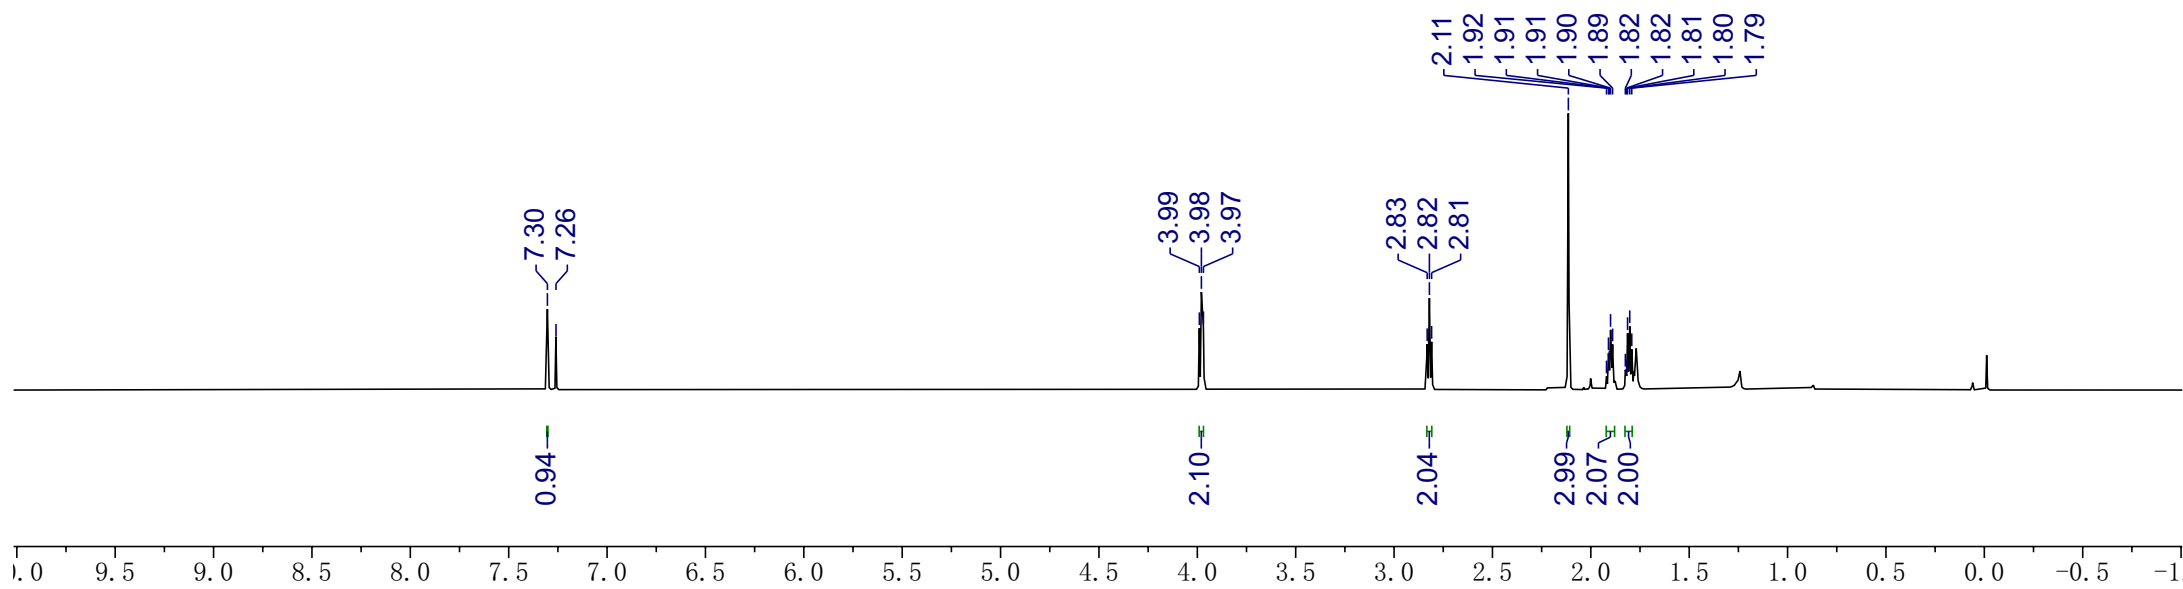

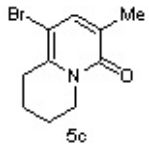

400 MHz, CDCl<sub>3</sub>

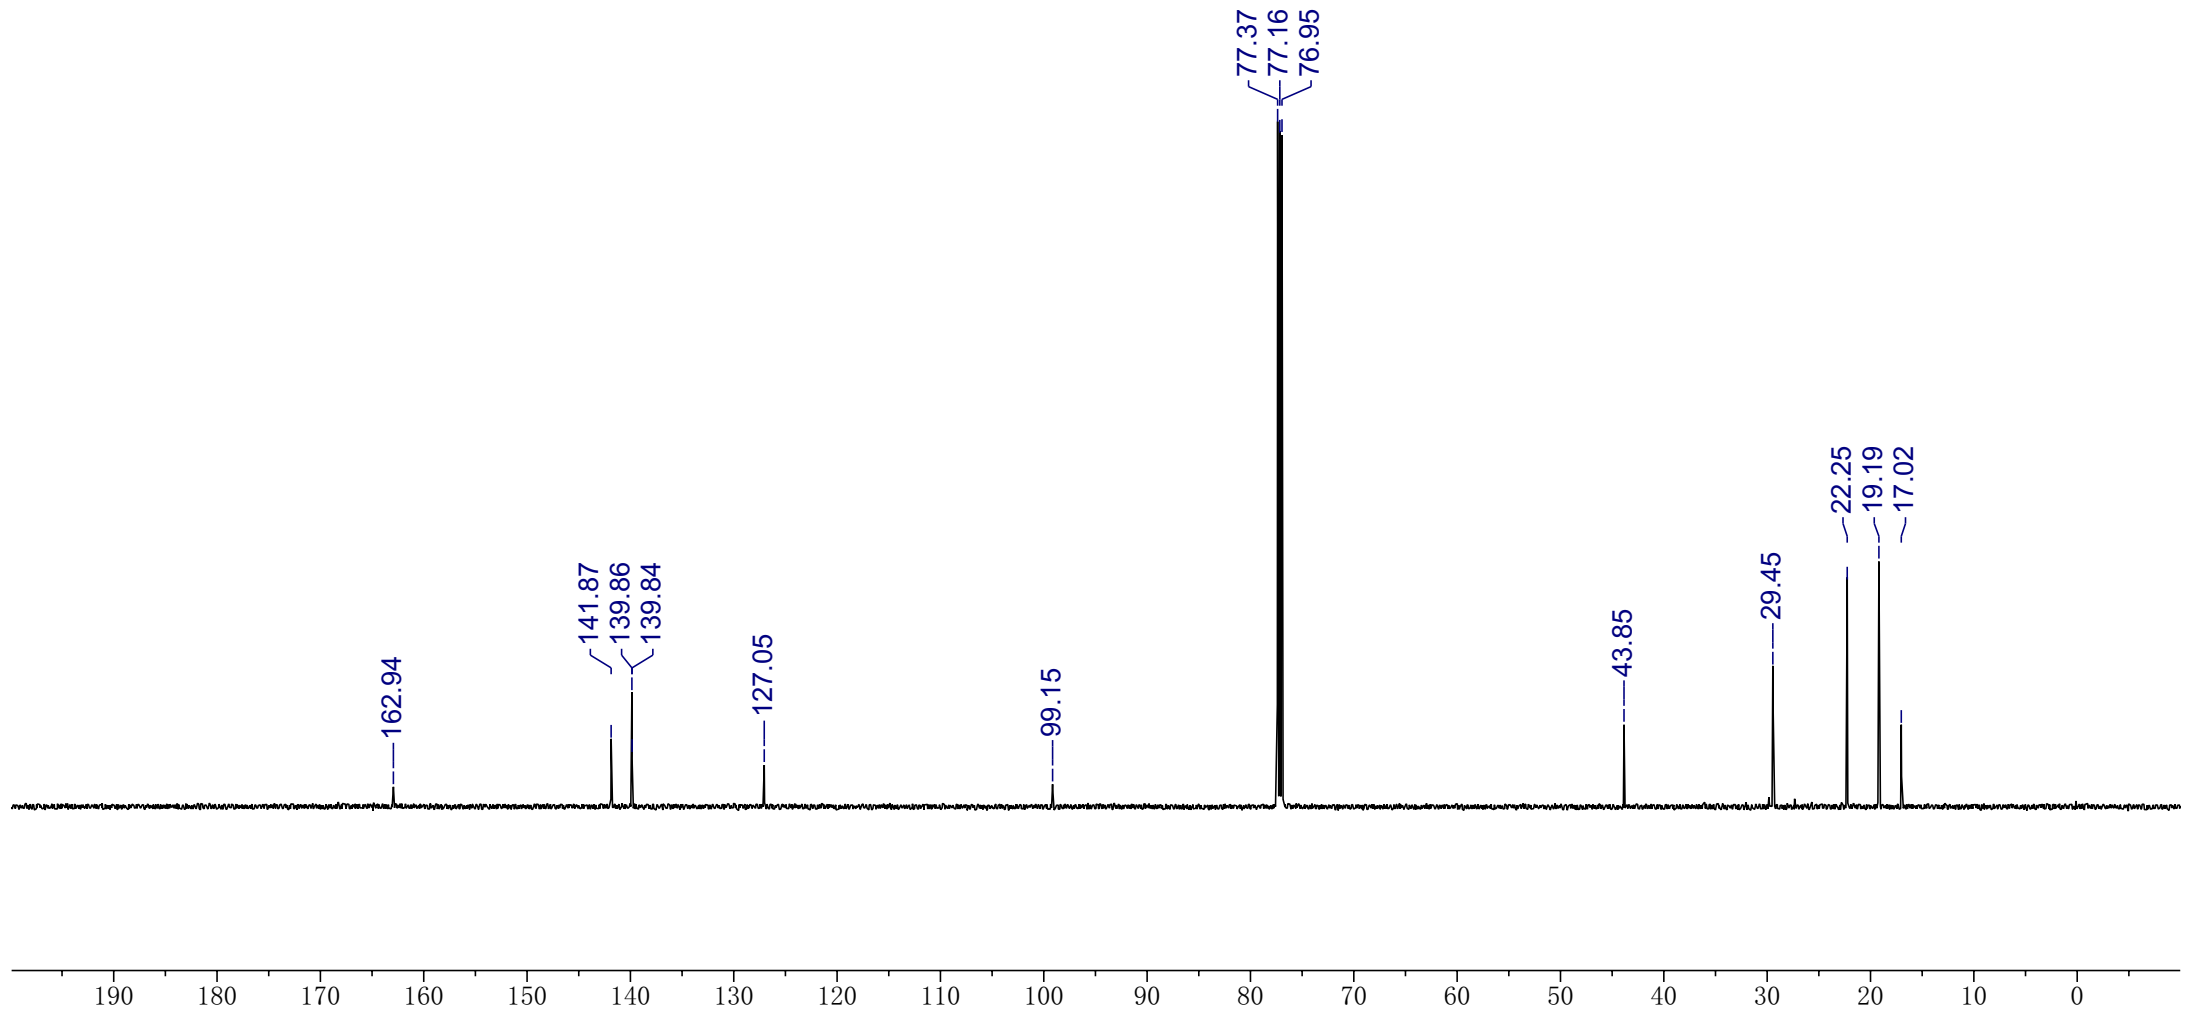

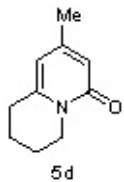

400 MHz, CDCl<sub>3</sub>

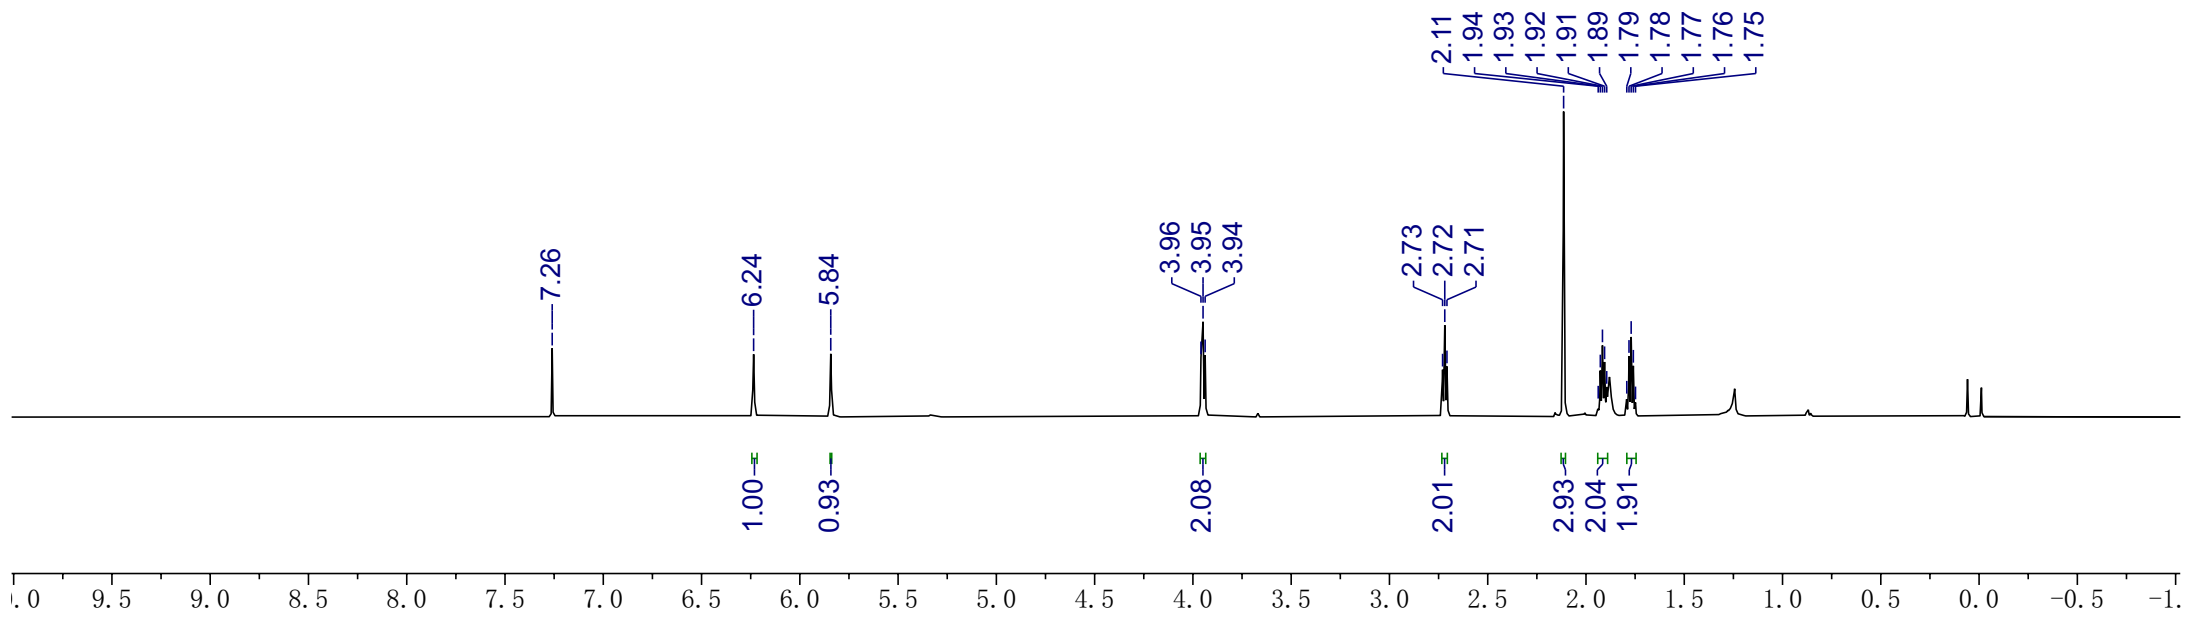

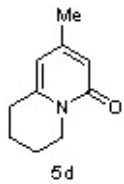

400 MHz, CDCl<sub>3</sub>

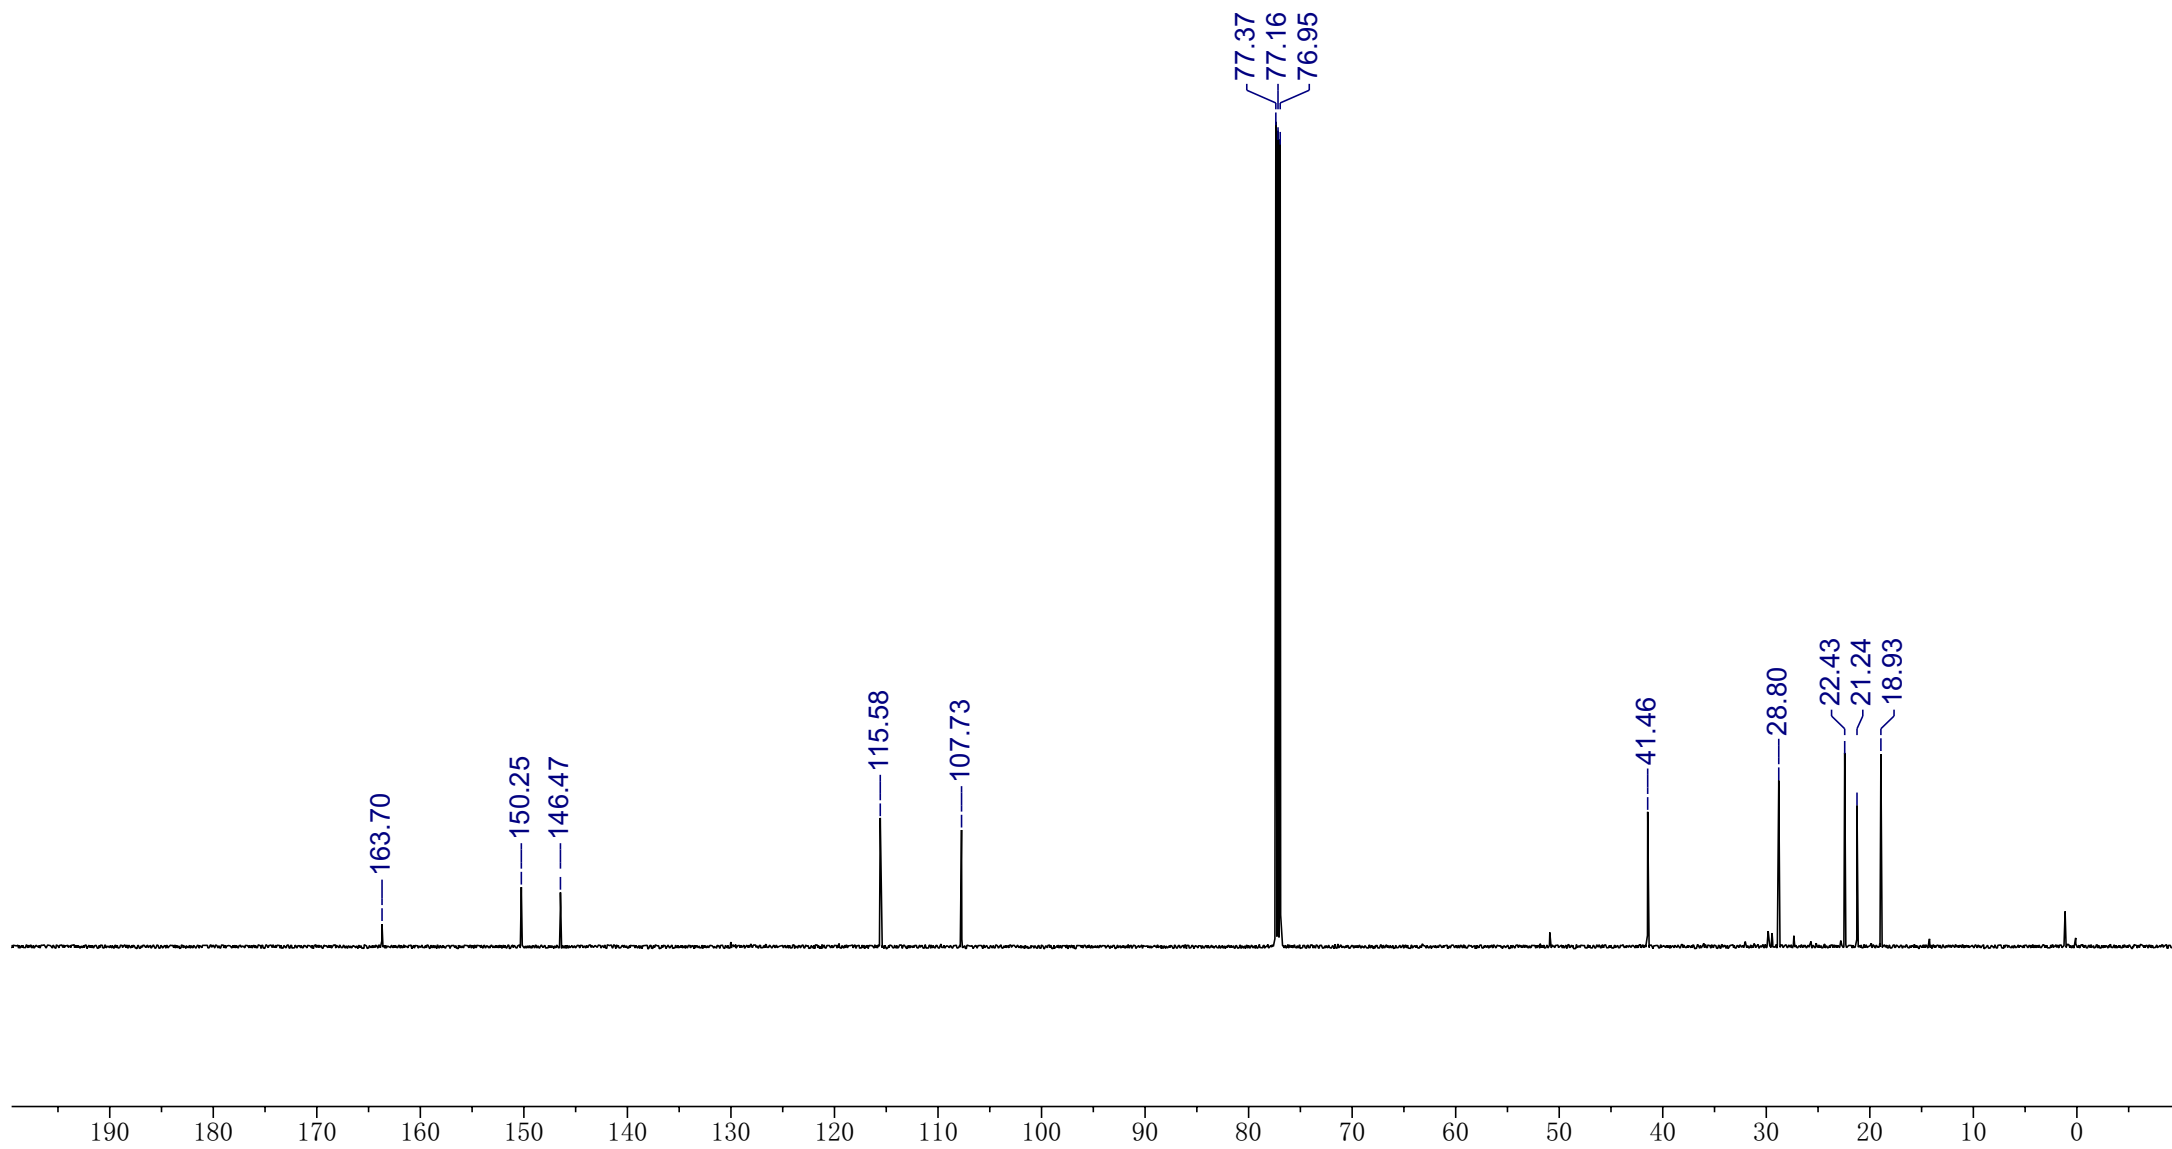

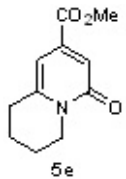

400 MHz, CDCl<sub>3</sub>

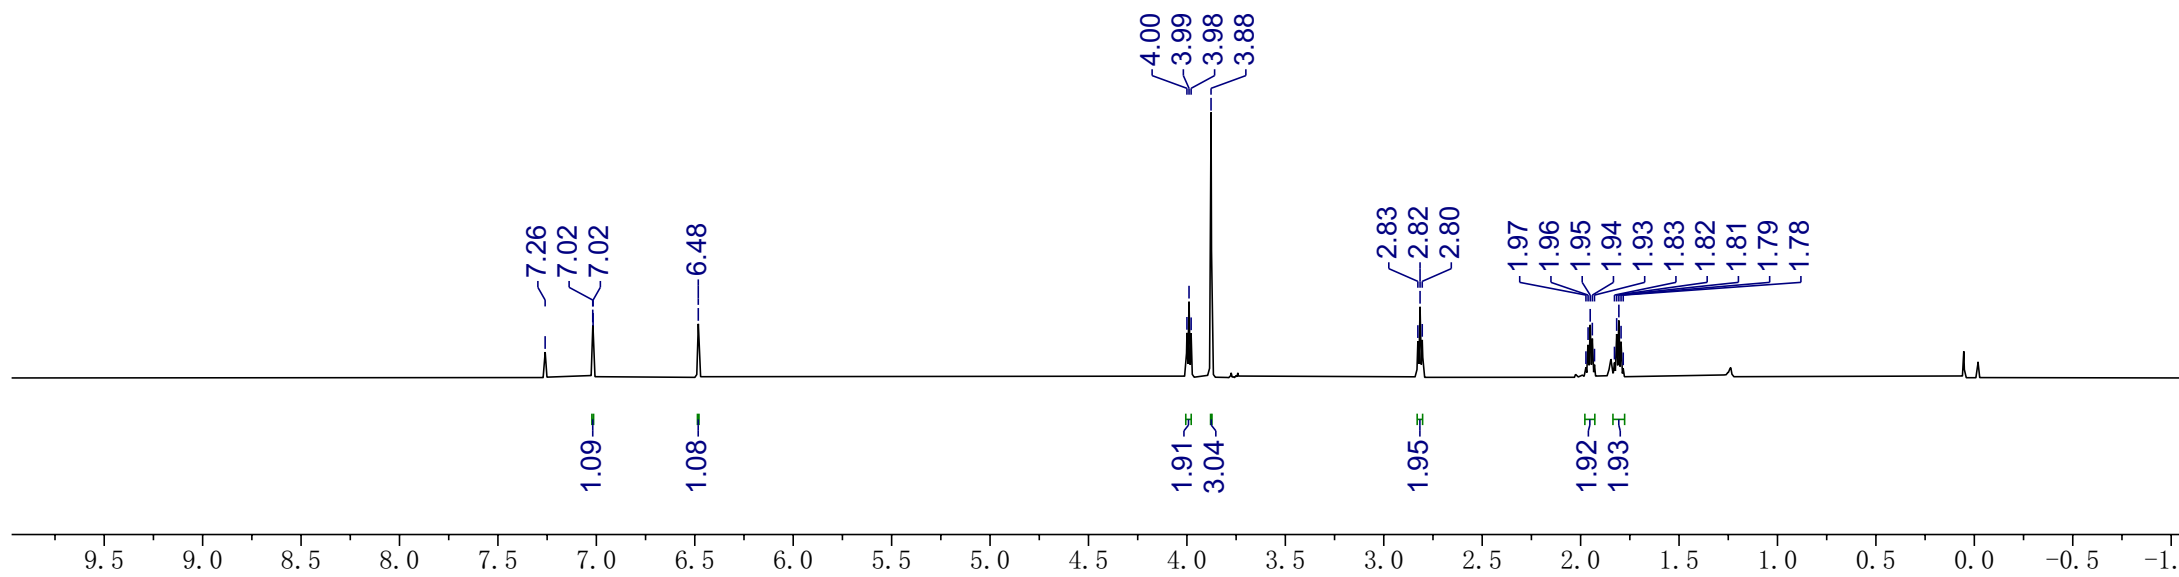

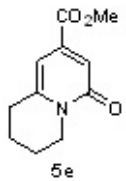

400 MHz, CDCl<sub>3</sub>

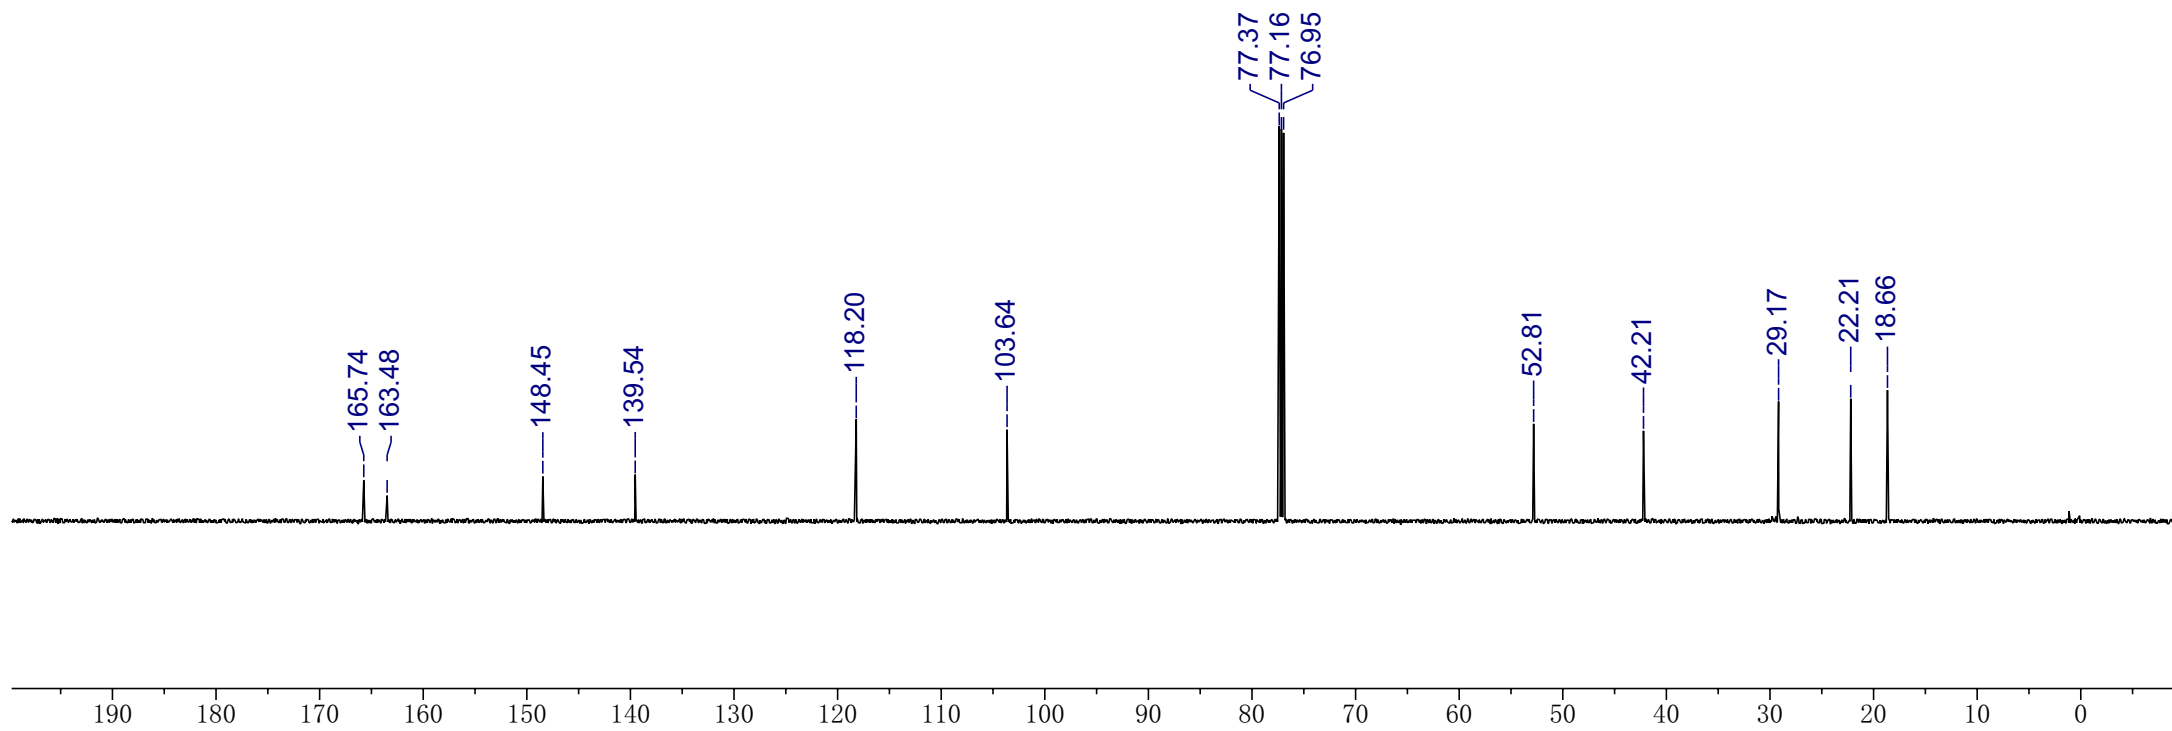



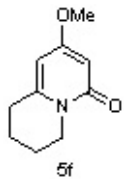

400 MHz, CDCl<sub>3</sub>

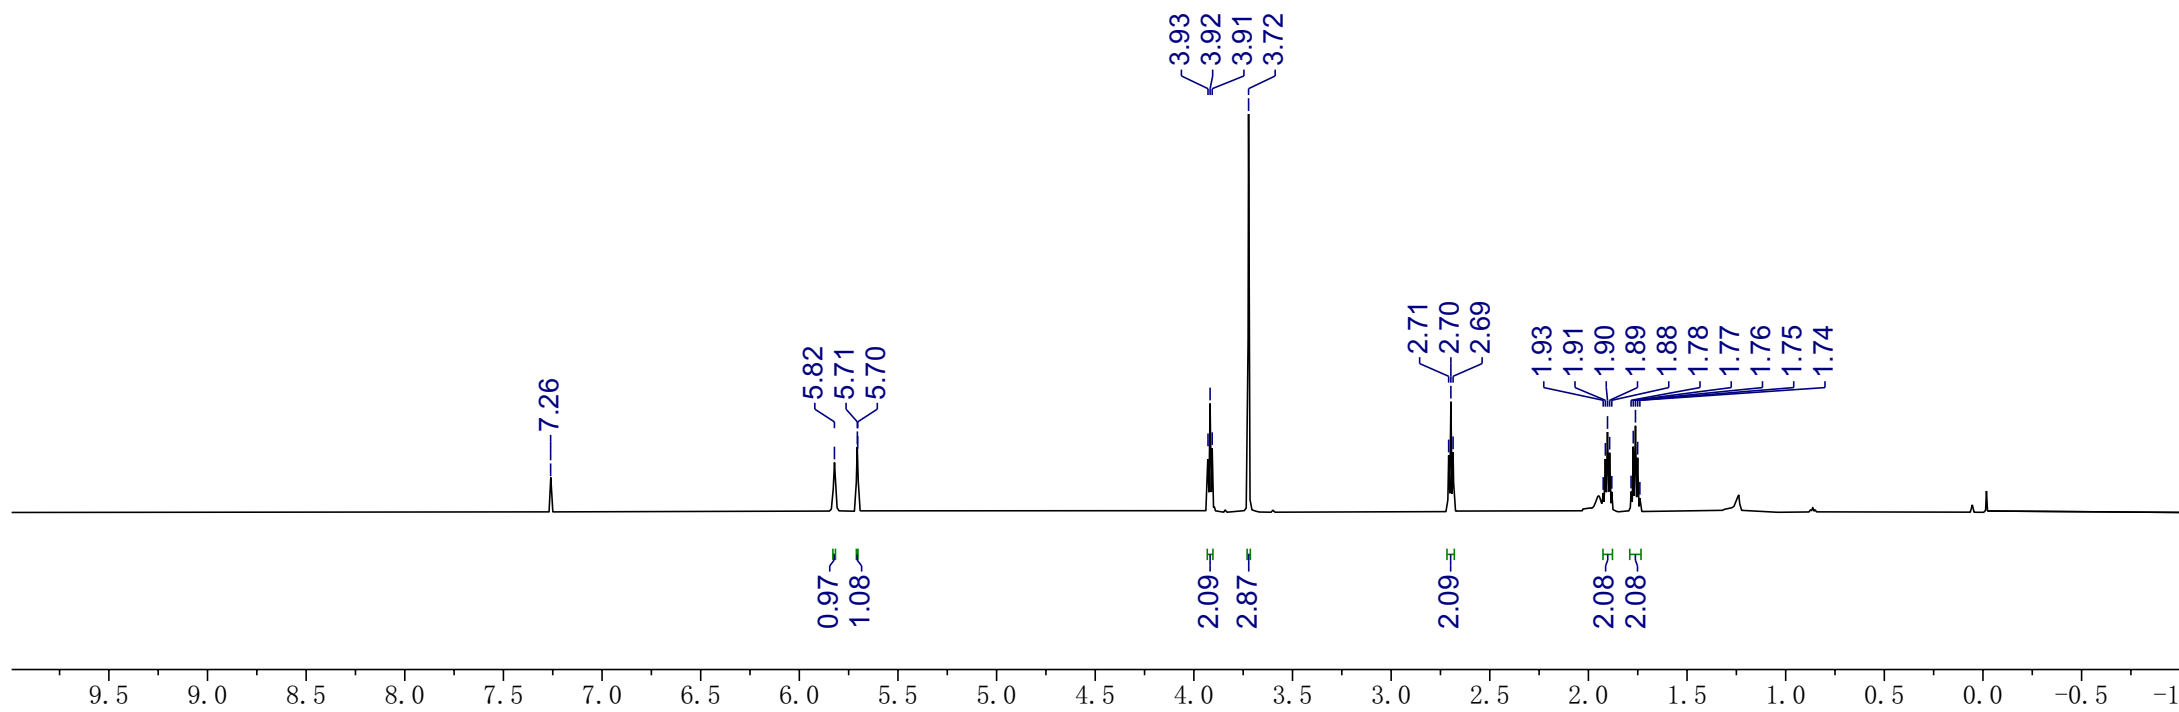



400 MHz, CDCl<sub>3</sub>

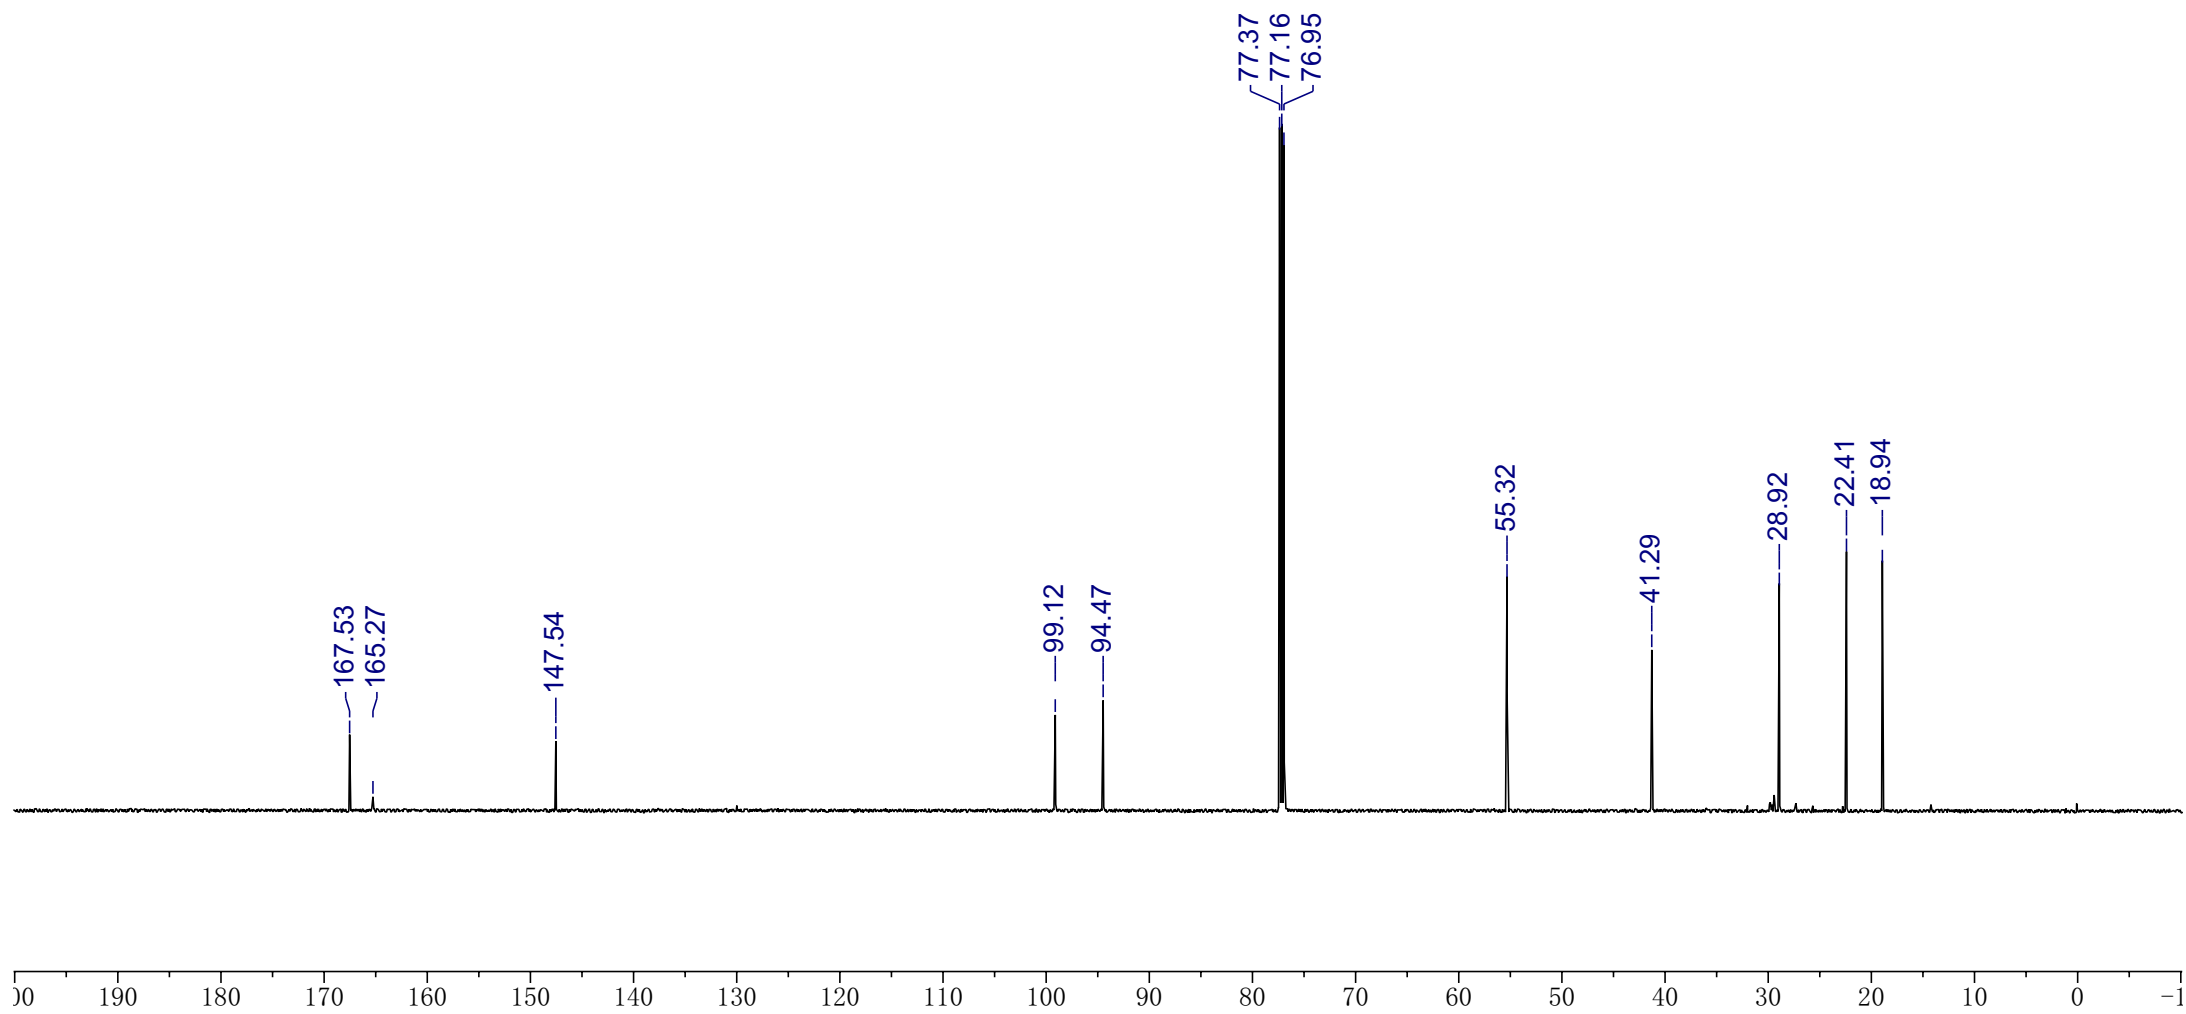

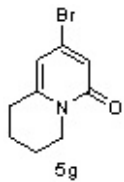

400 MHz, CDCl<sub>3</sub>

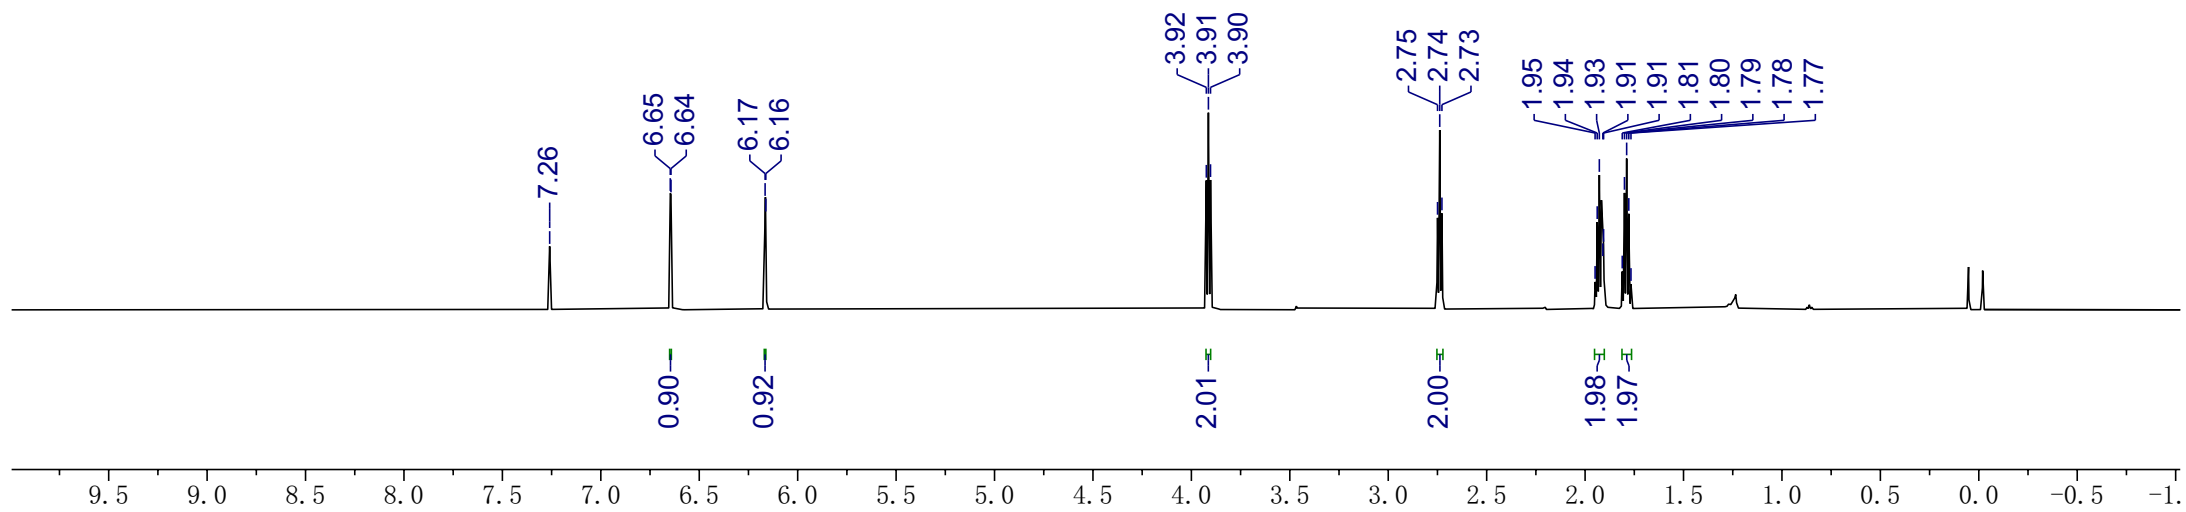



400 MHz, CDCl<sub>3</sub>

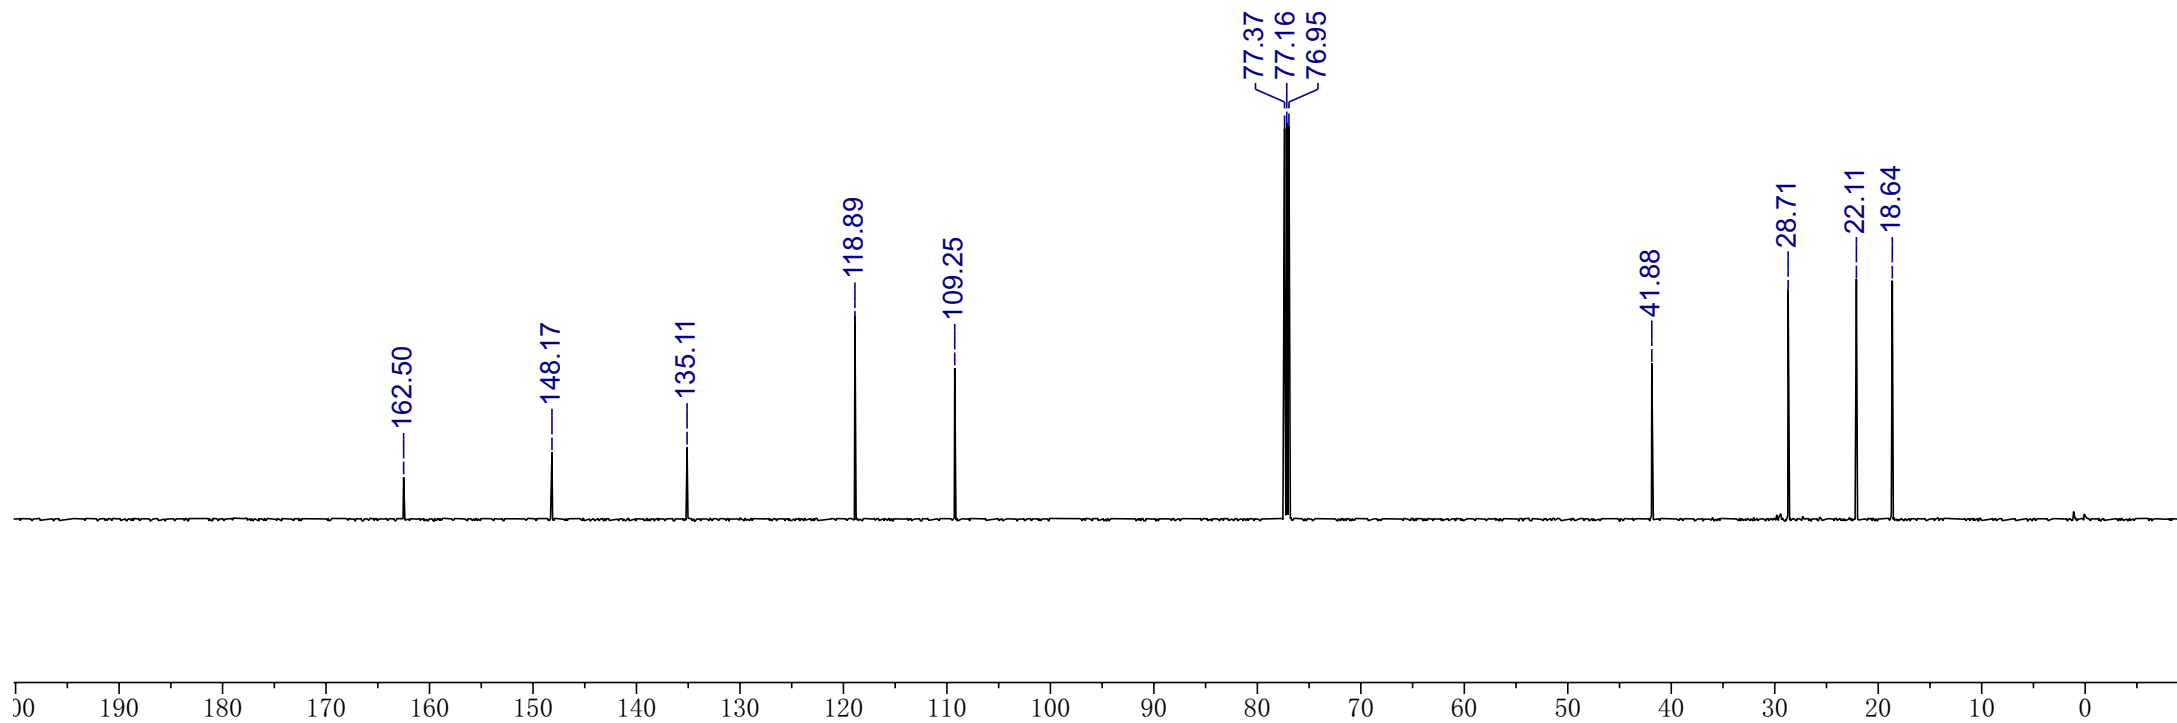

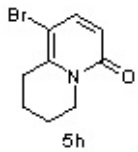

400 MHz, CDCl<sub>3</sub>

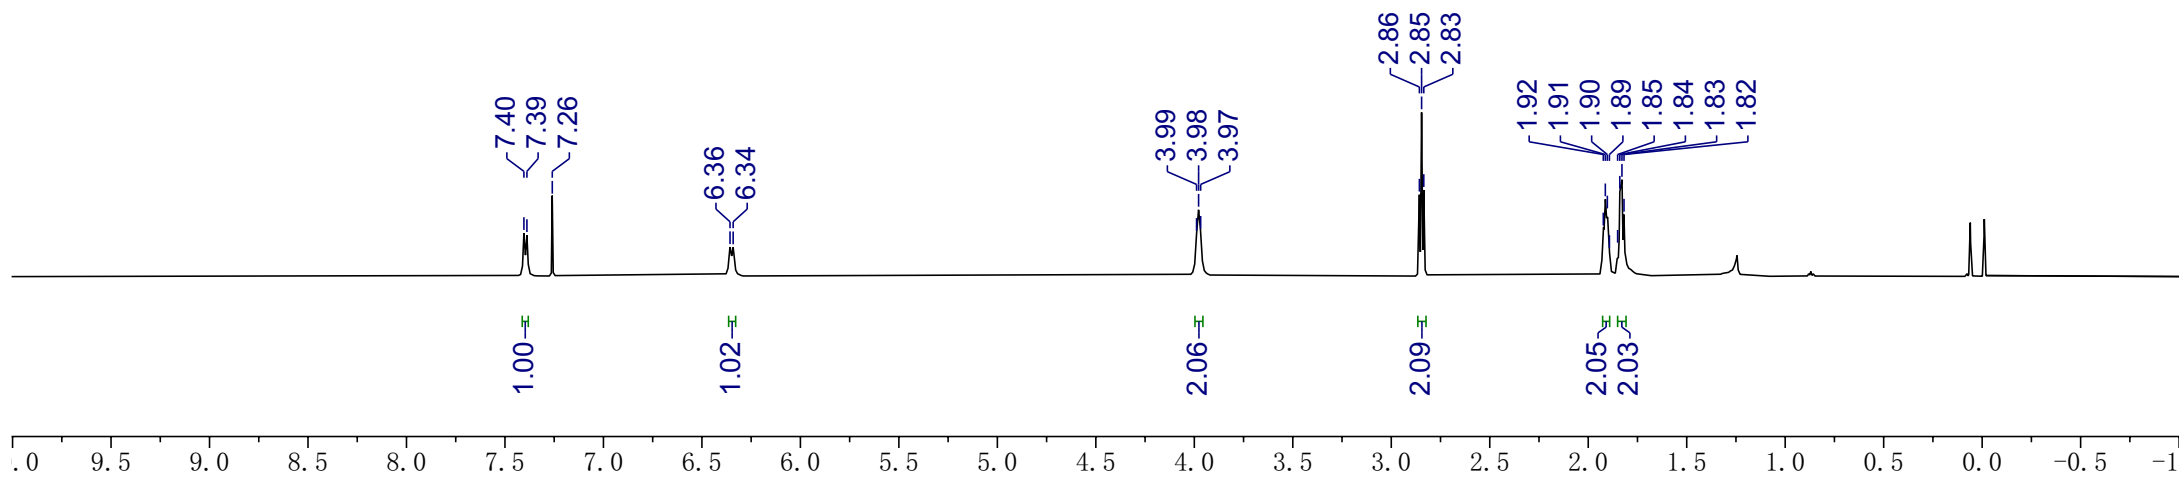

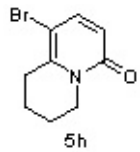

400 MHz, CDCl<sub>3</sub>

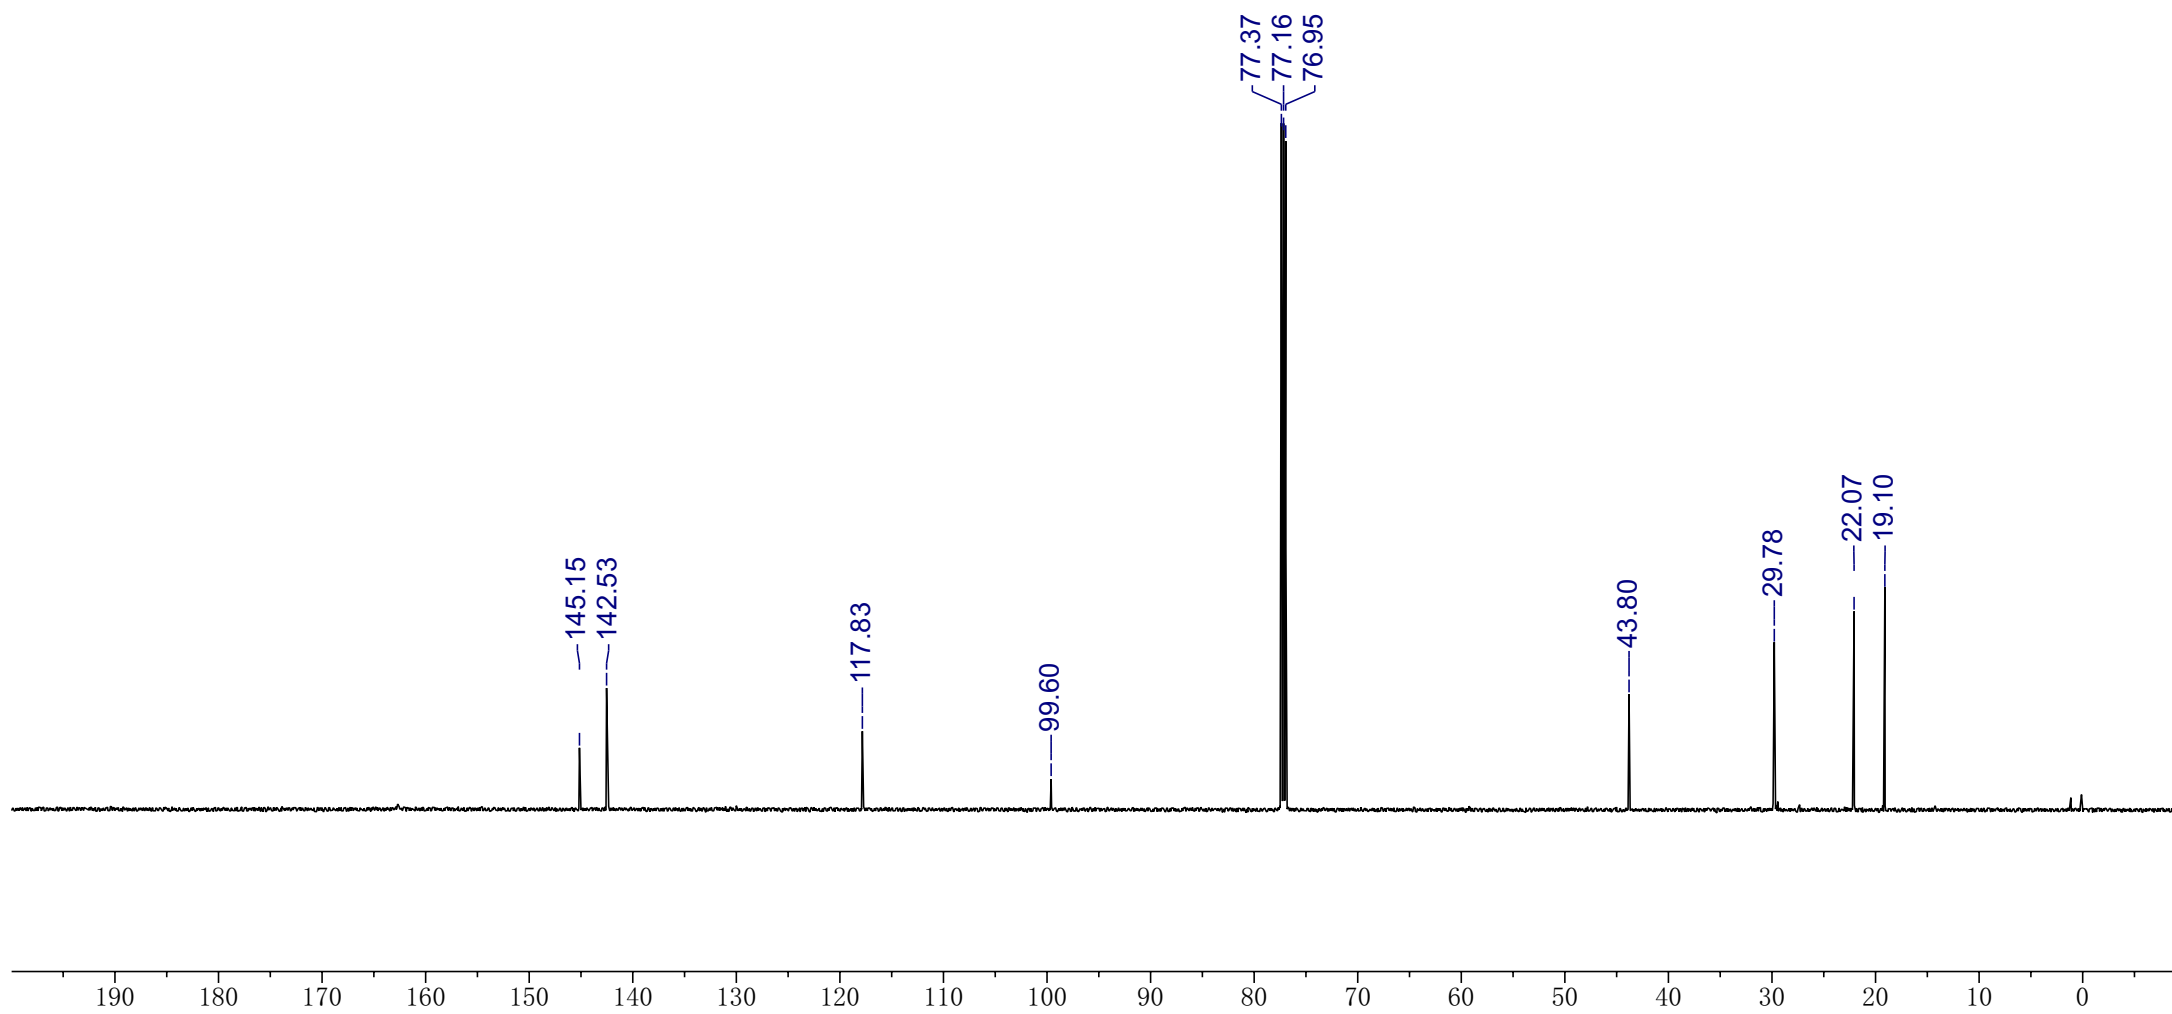

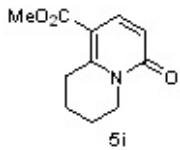

400 MHz, CDCl<sub>3</sub>

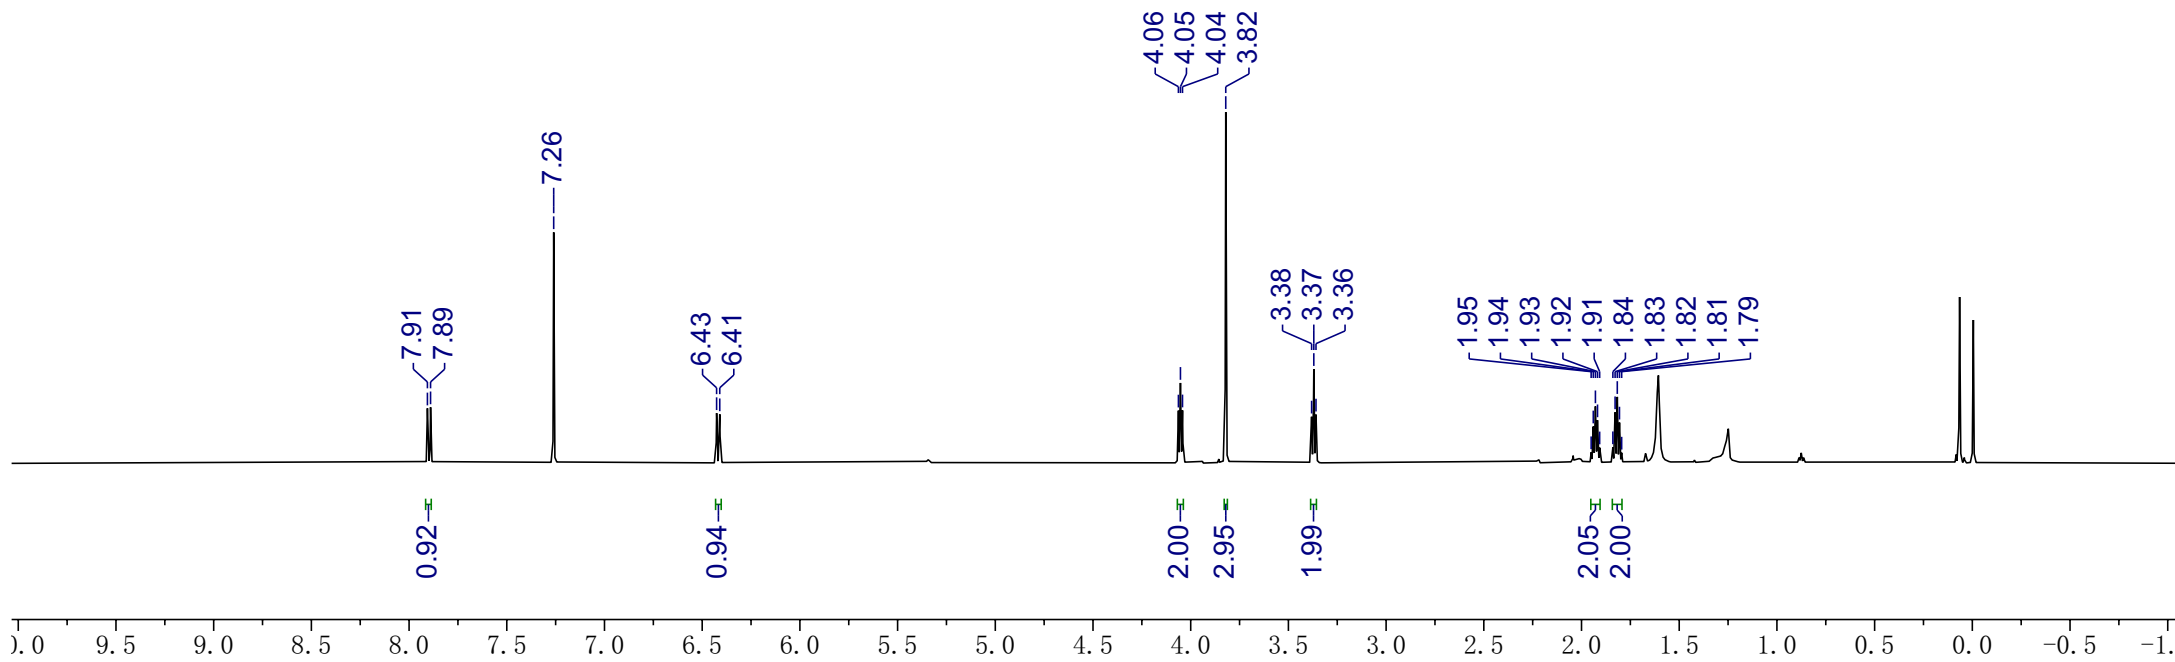

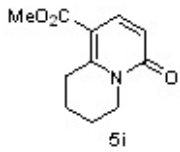

400 MHz, CDCl<sub>3</sub>

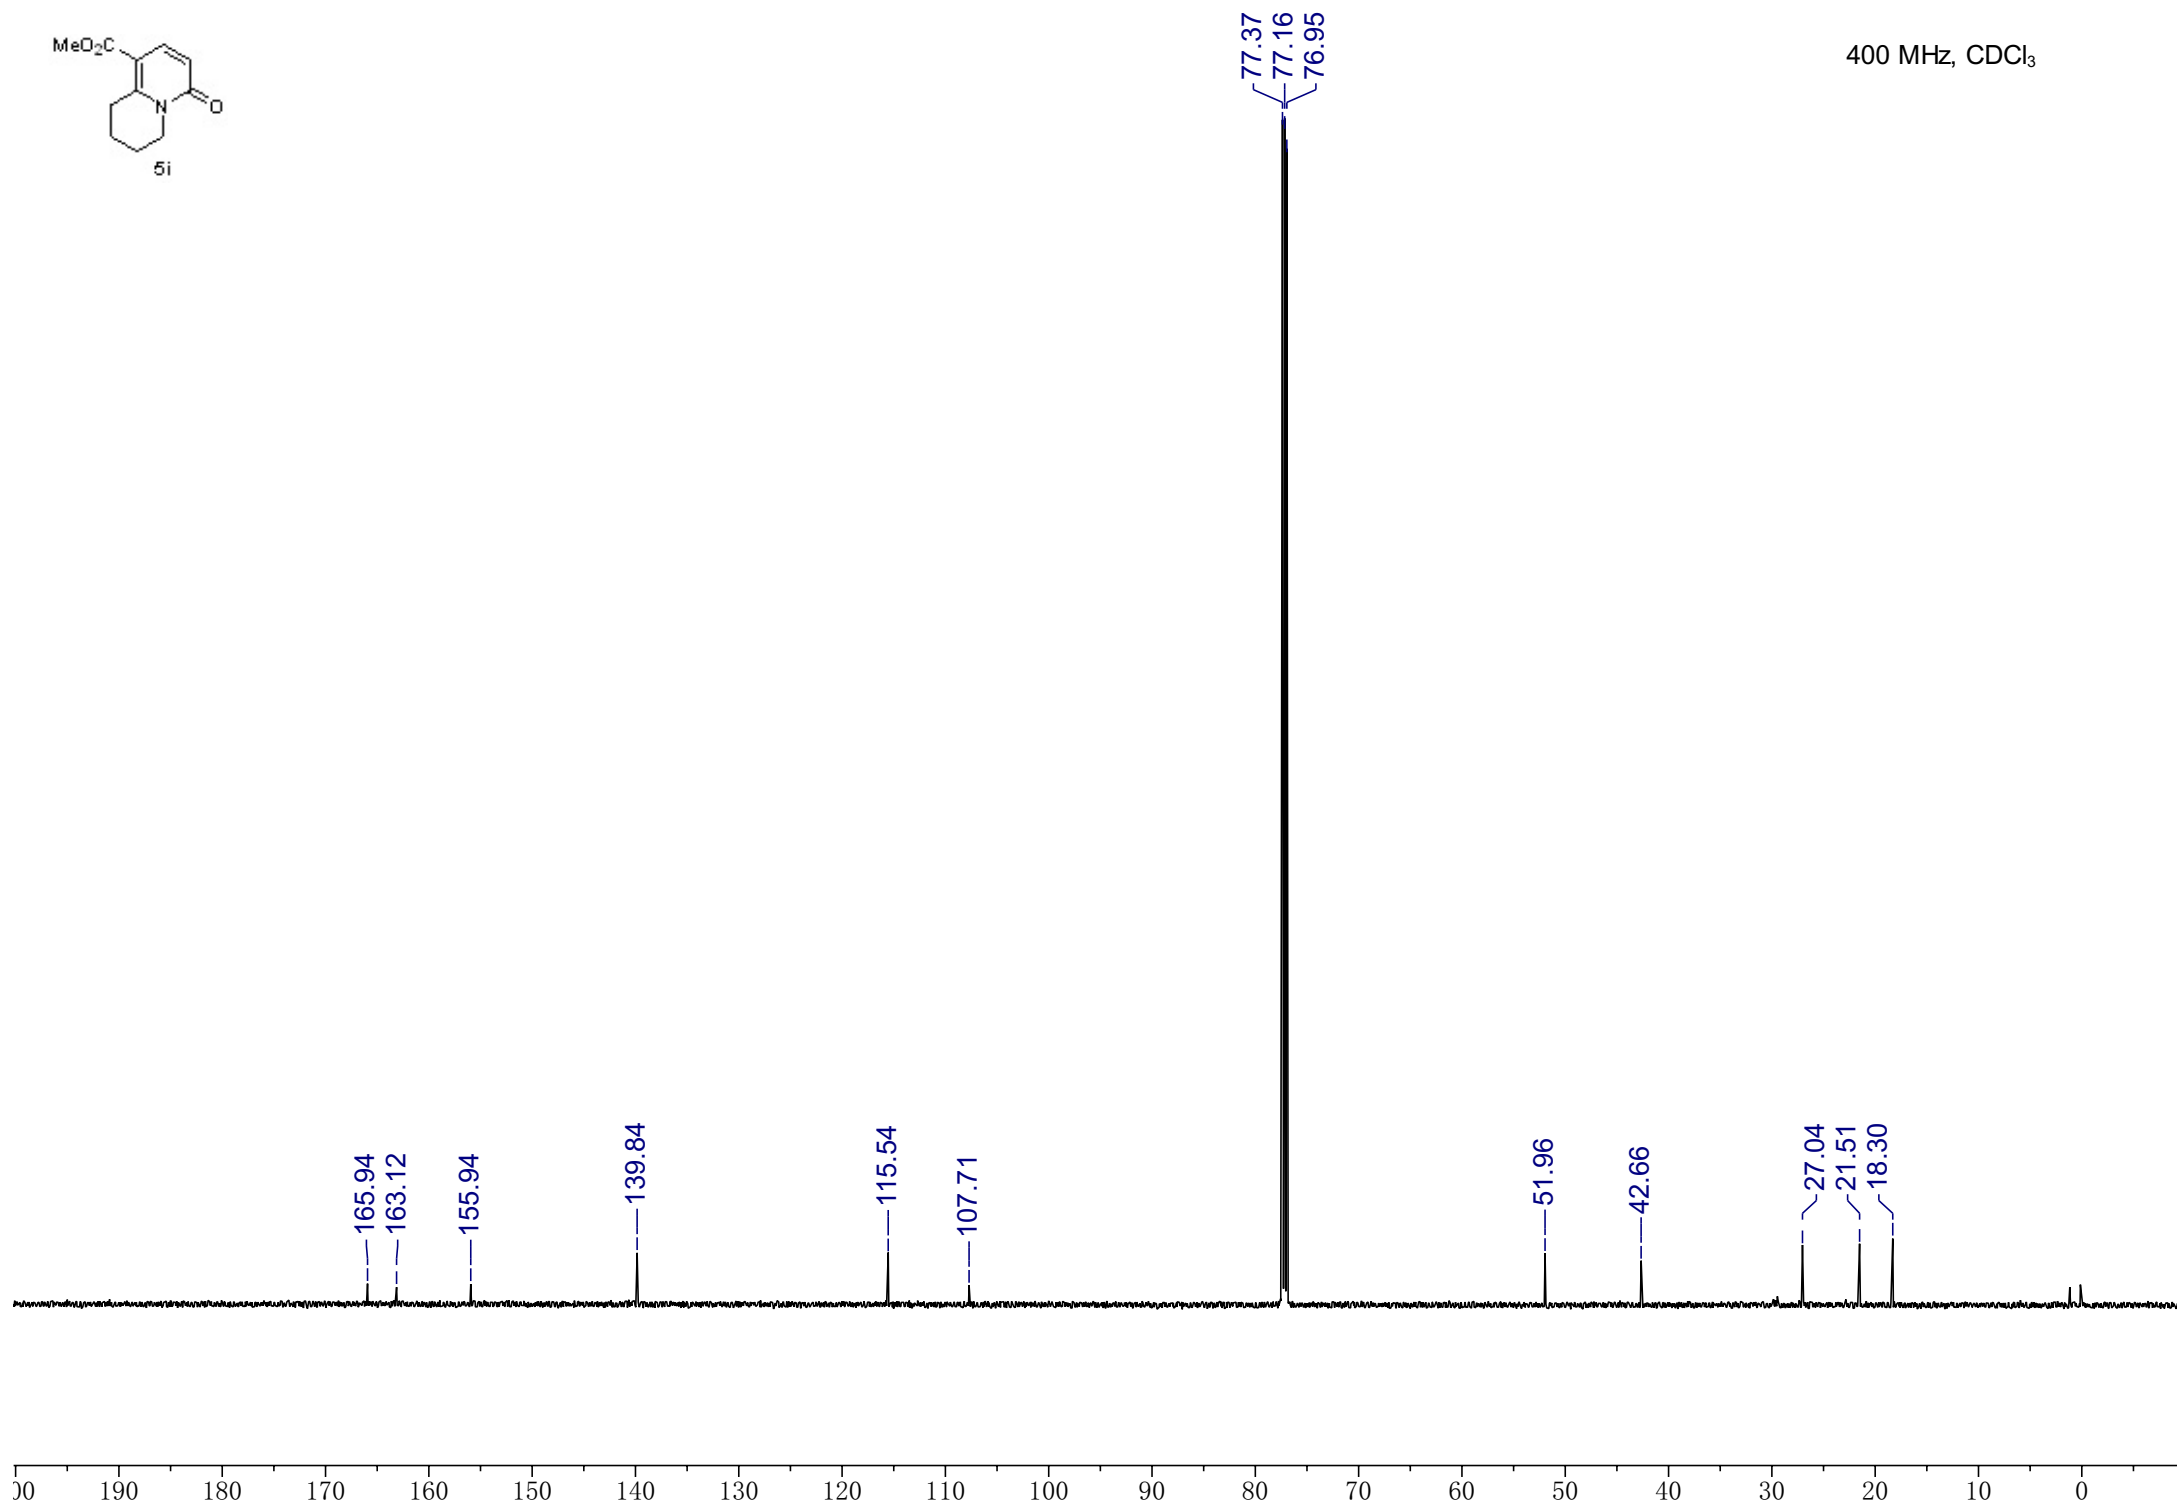



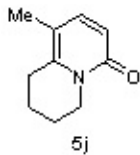

400 MHz, CDCl<sub>3</sub>

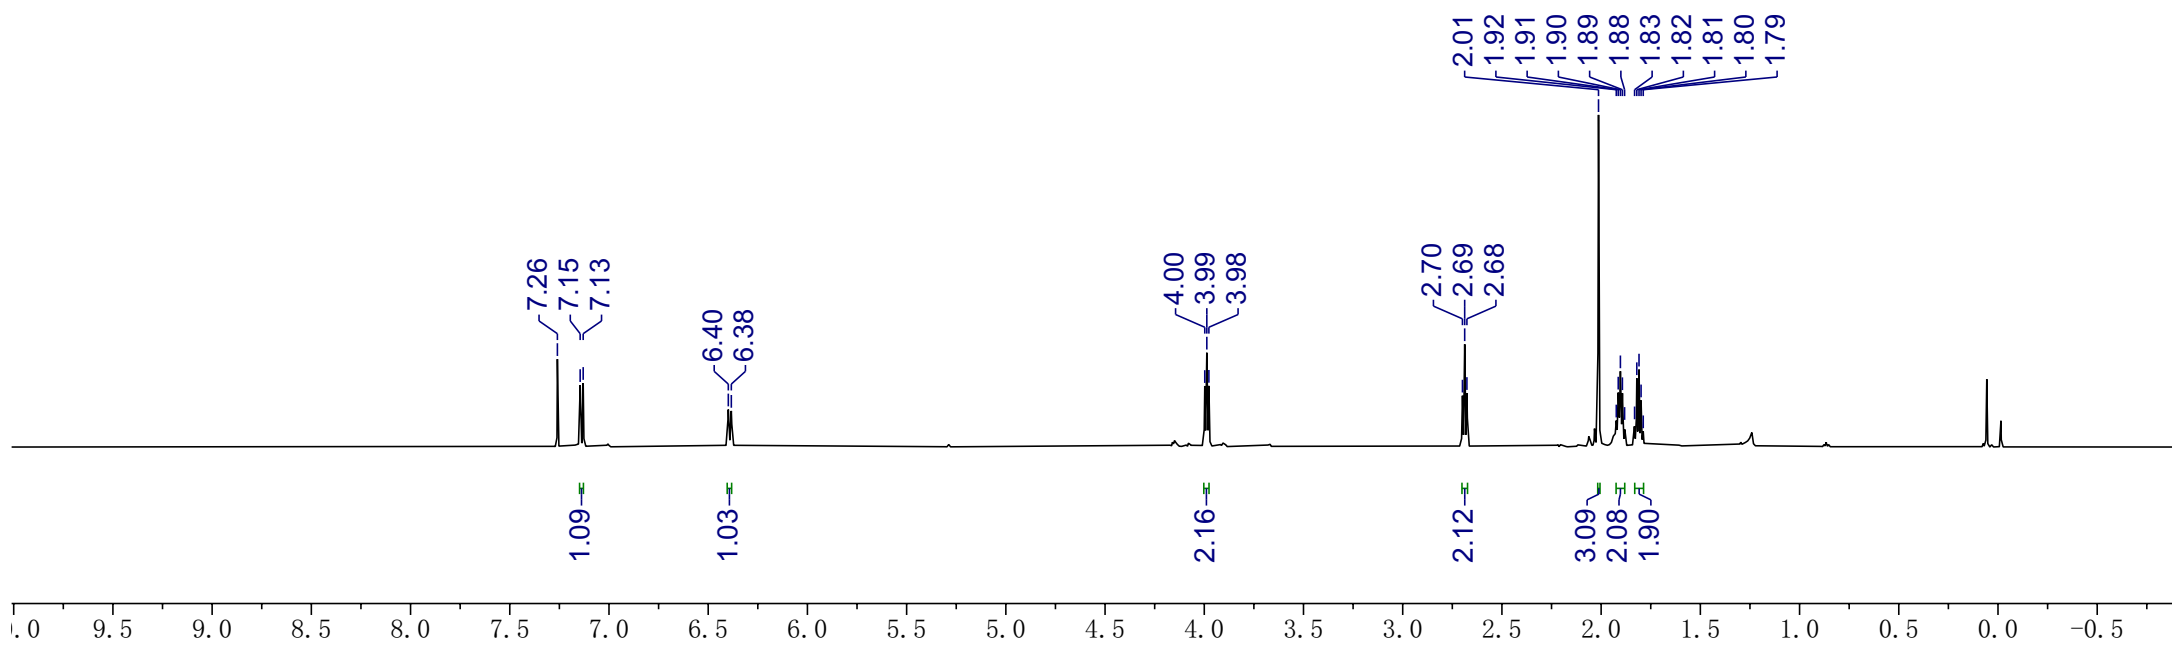

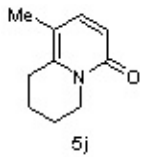

400 MHz, CDCl<sub>3</sub>

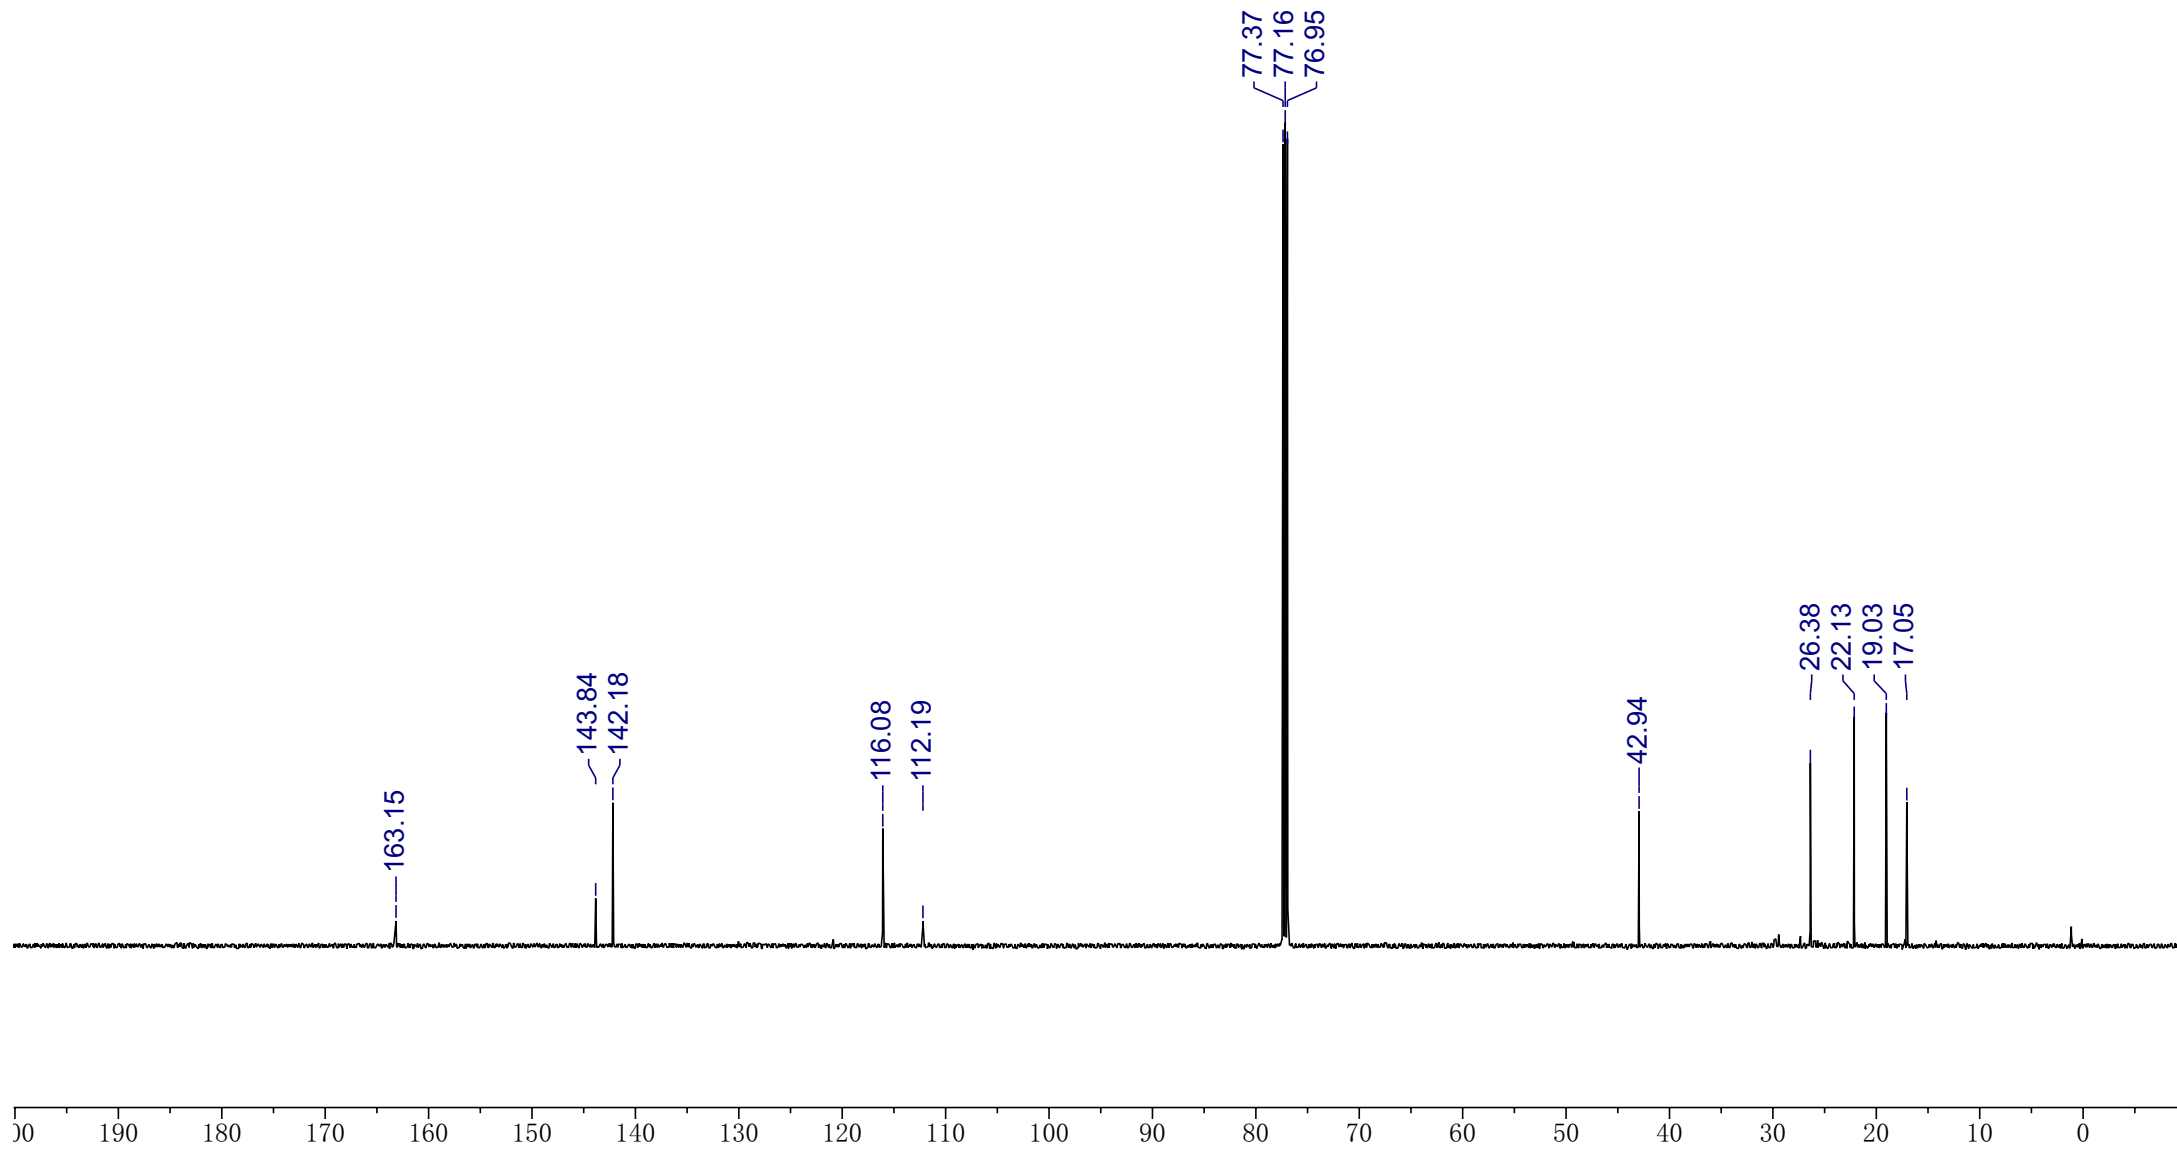

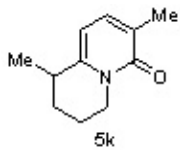

400 MHz, CDCl<sub>3</sub>

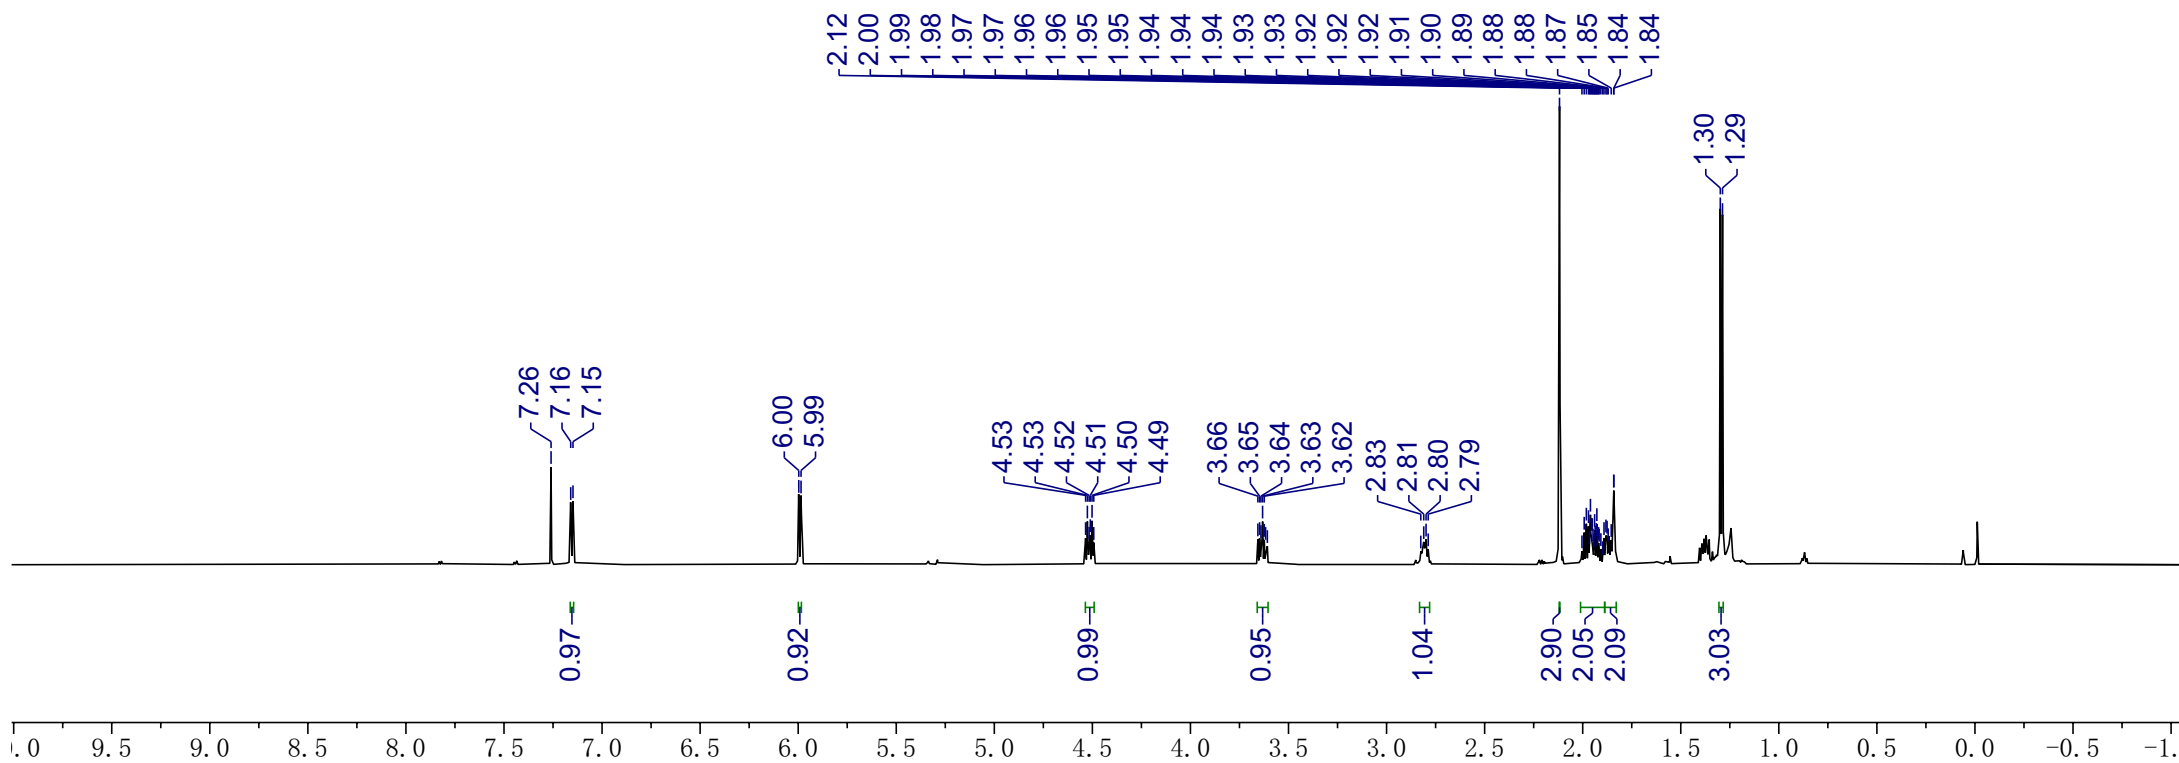

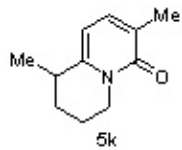

400 MHz, CDCl<sub>3</sub>

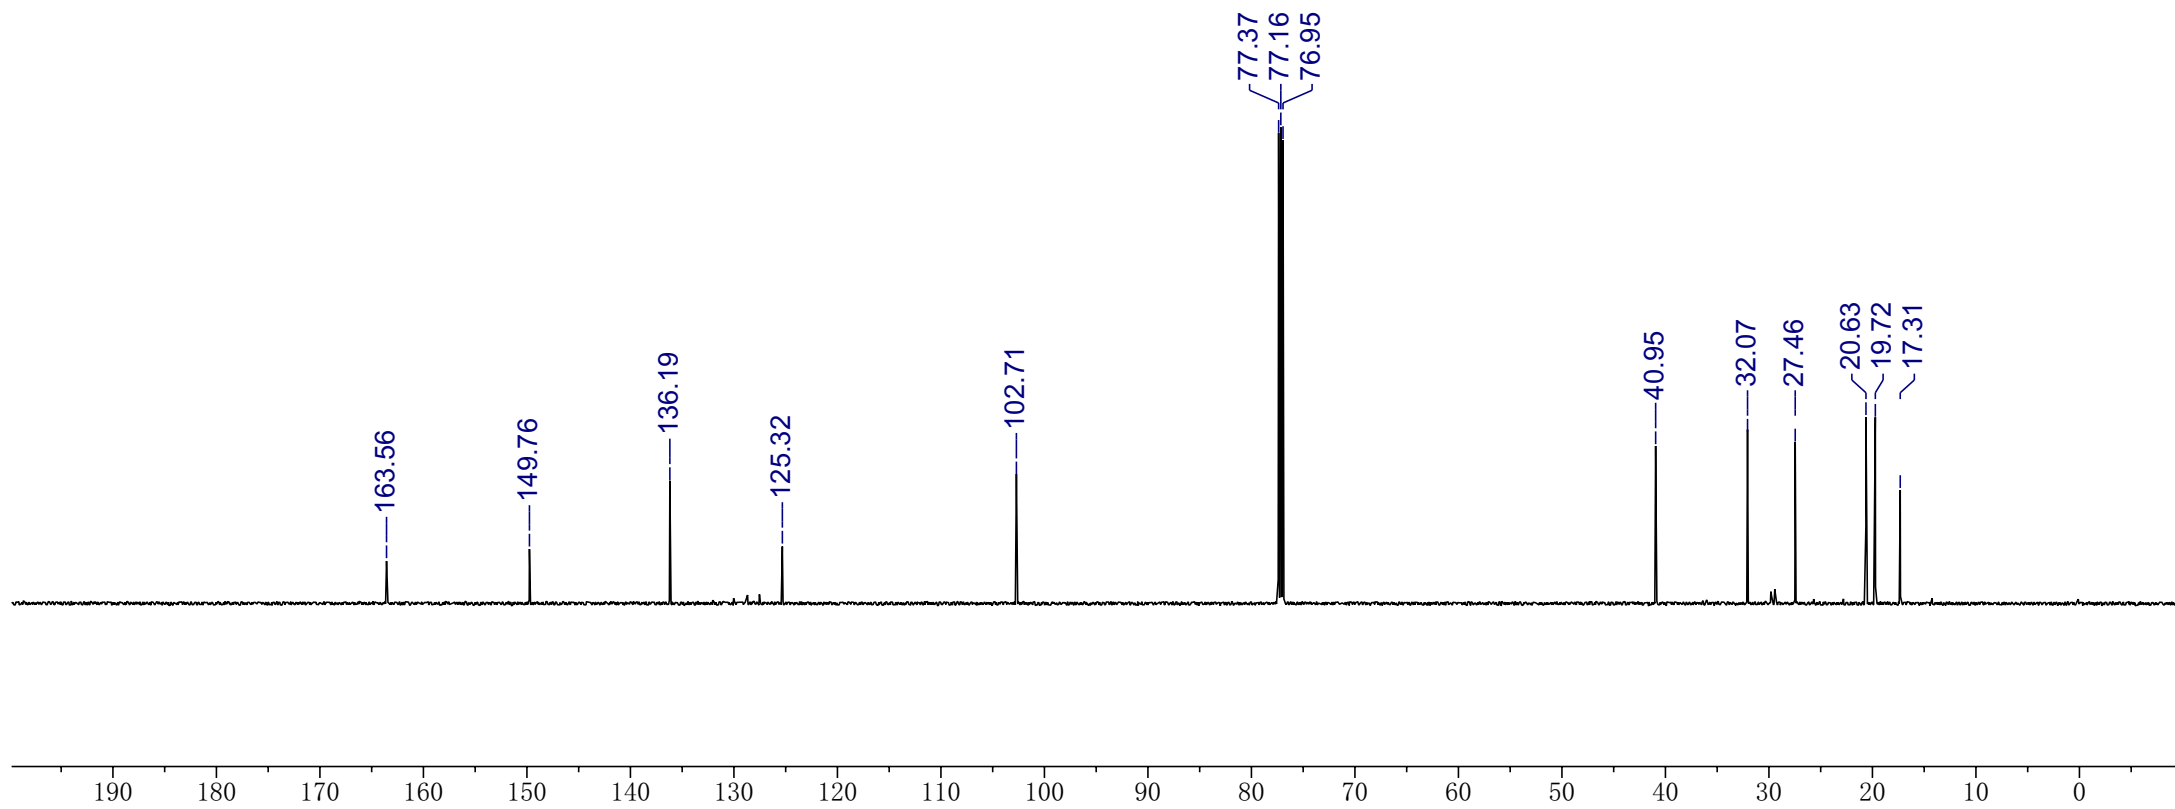

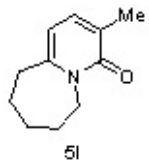

400 MHz, CDCl<sub>3</sub>

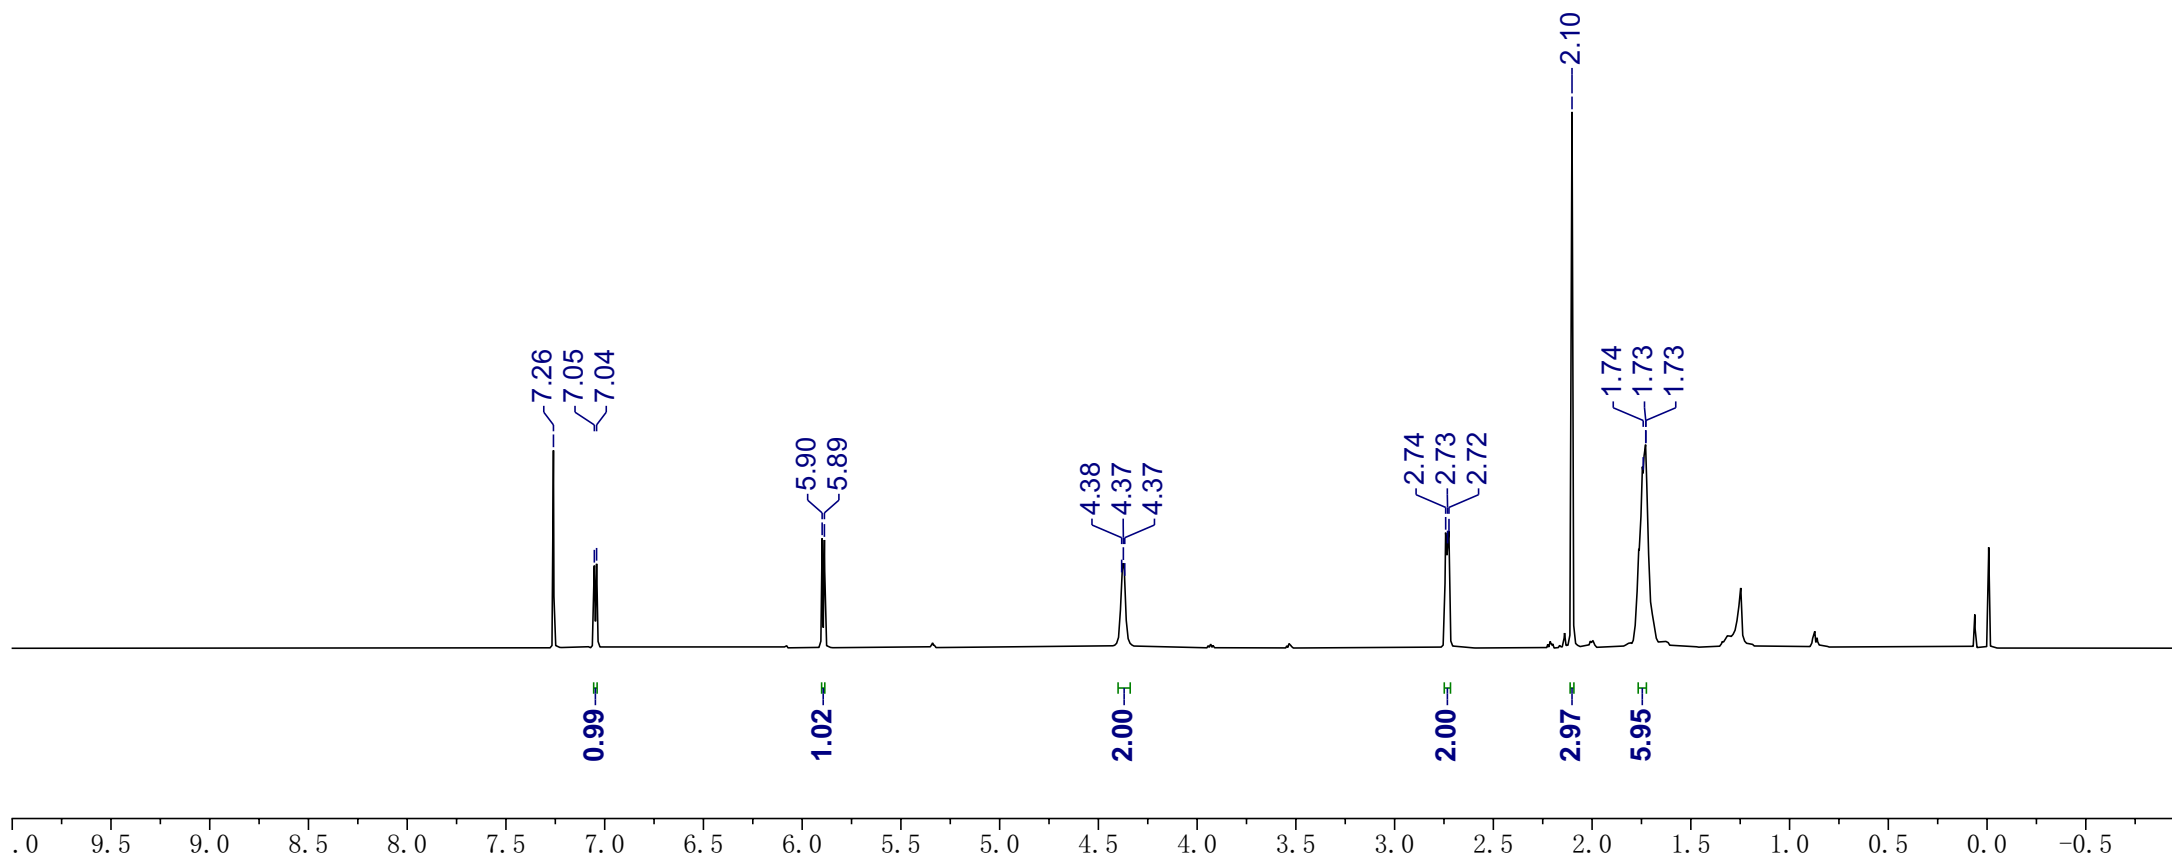

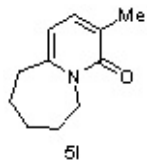

400 MHz, CDCl<sub>3</sub>

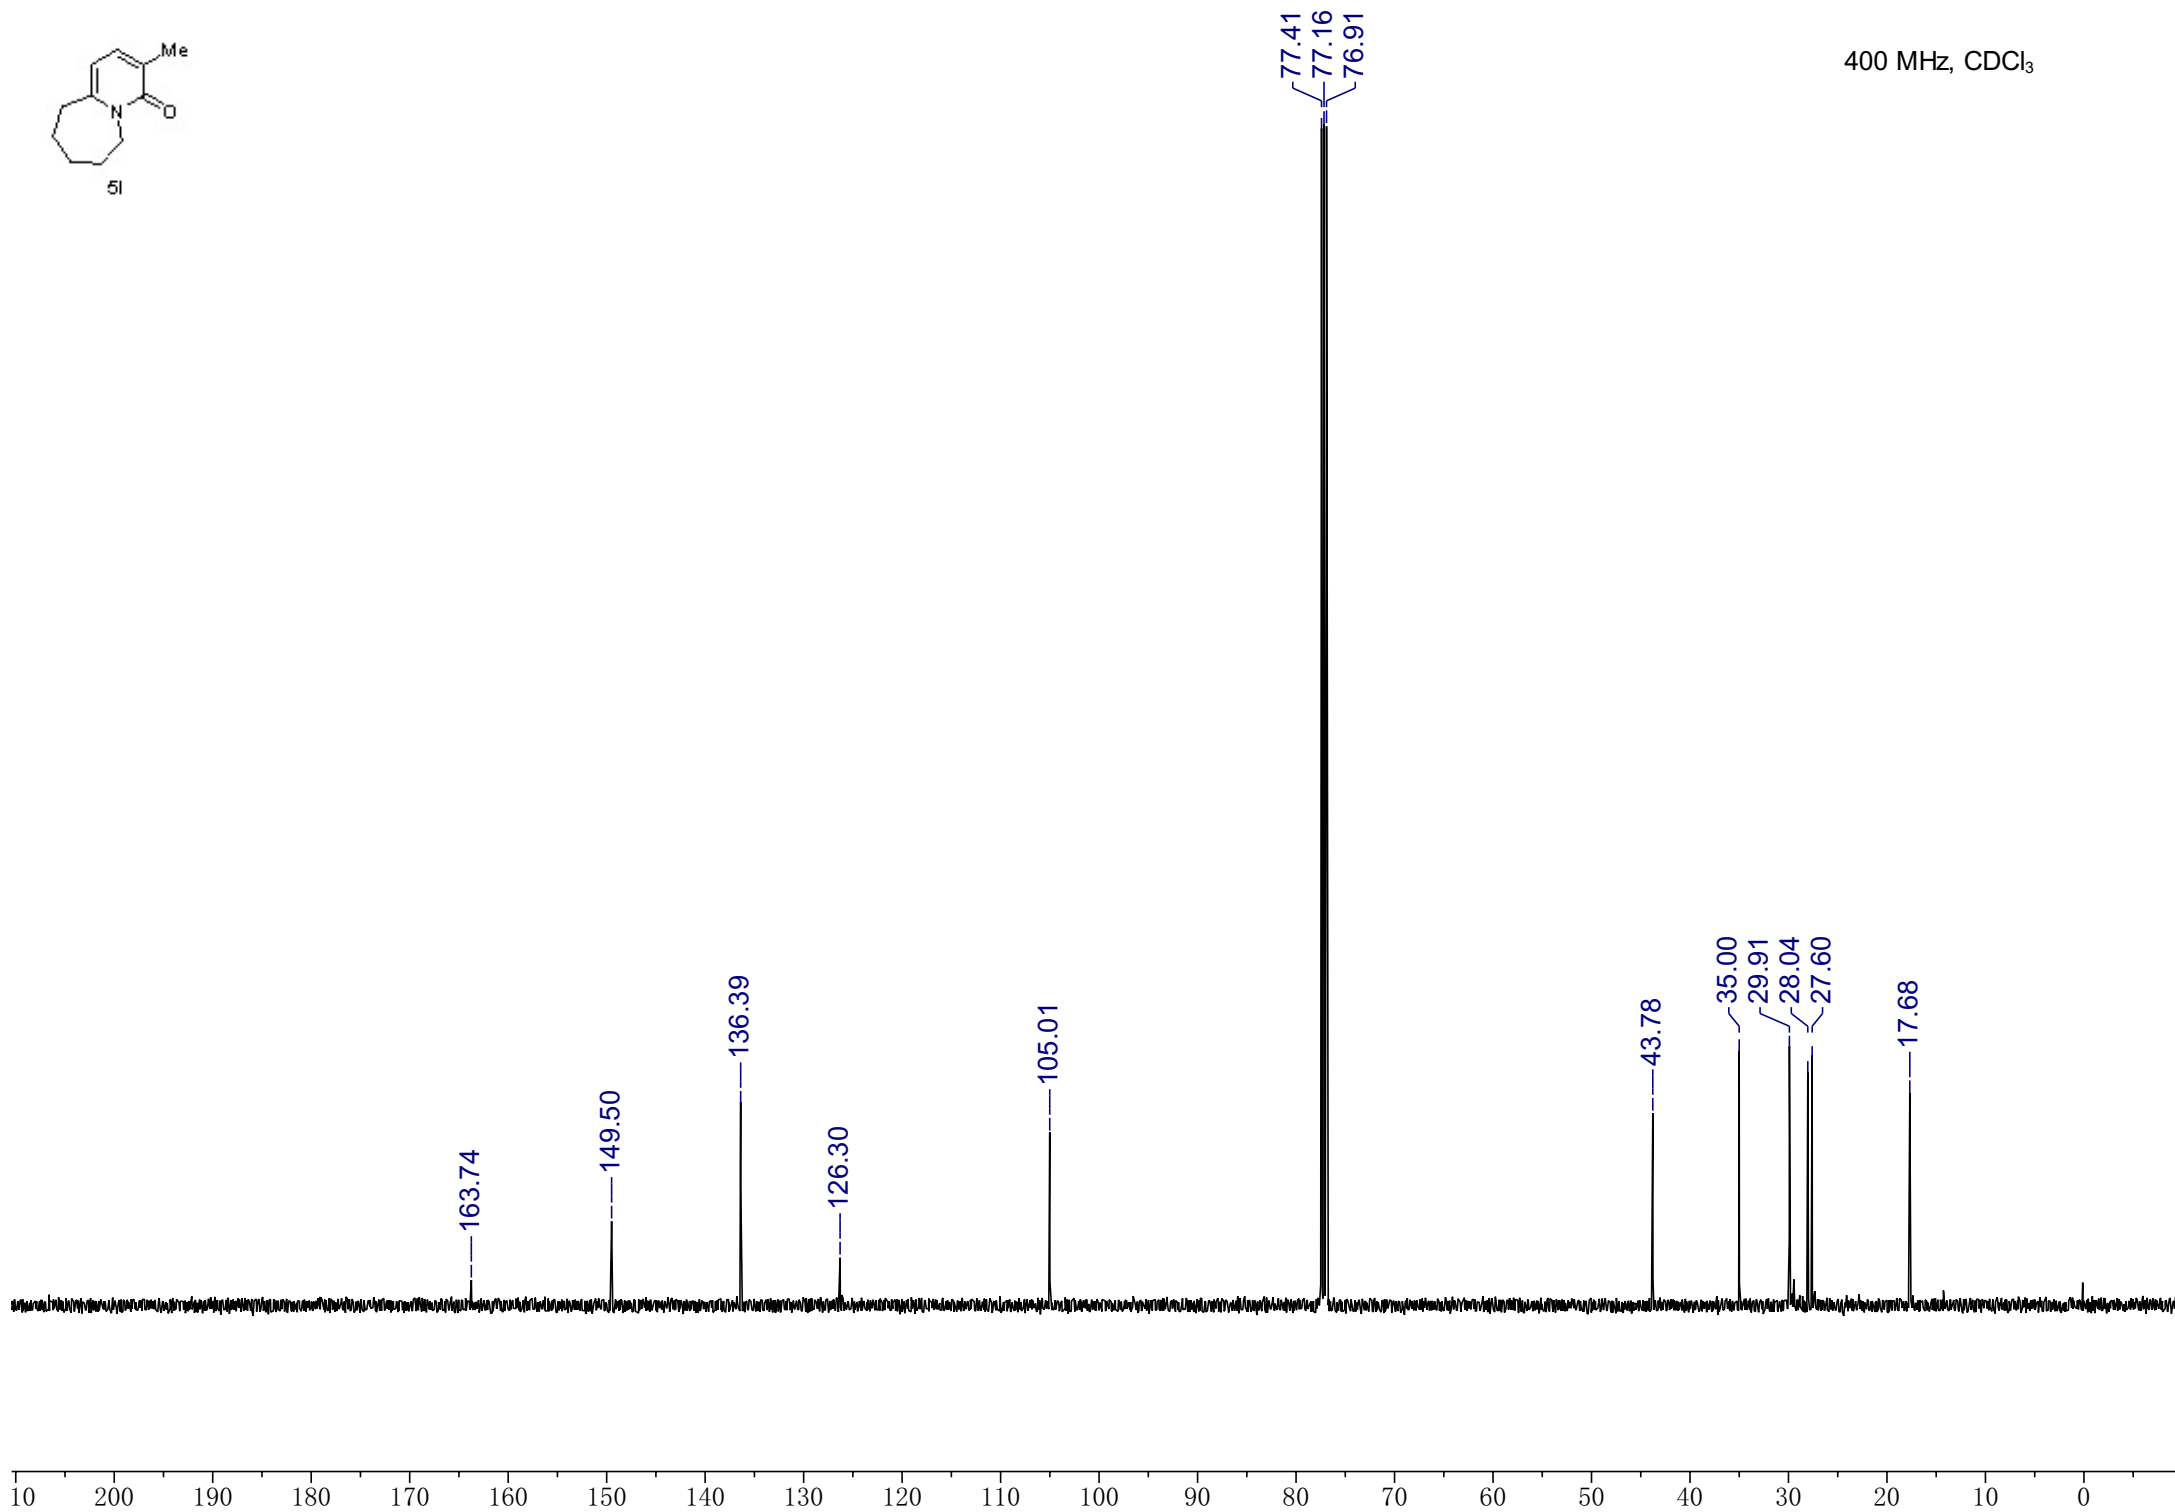

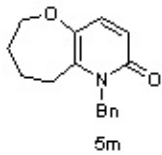

400 MHz, CDCl<sub>3</sub>

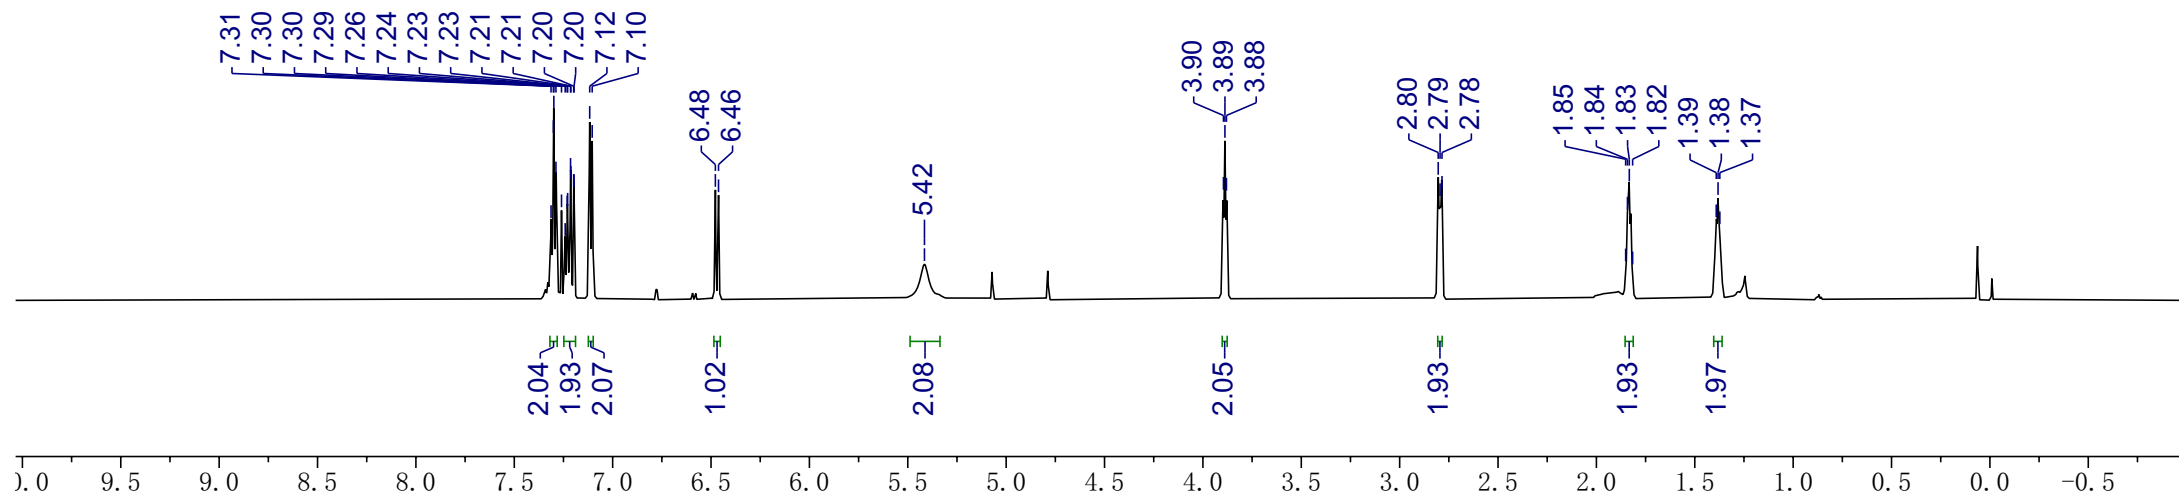



400 MHz, CDCl<sub>3</sub>

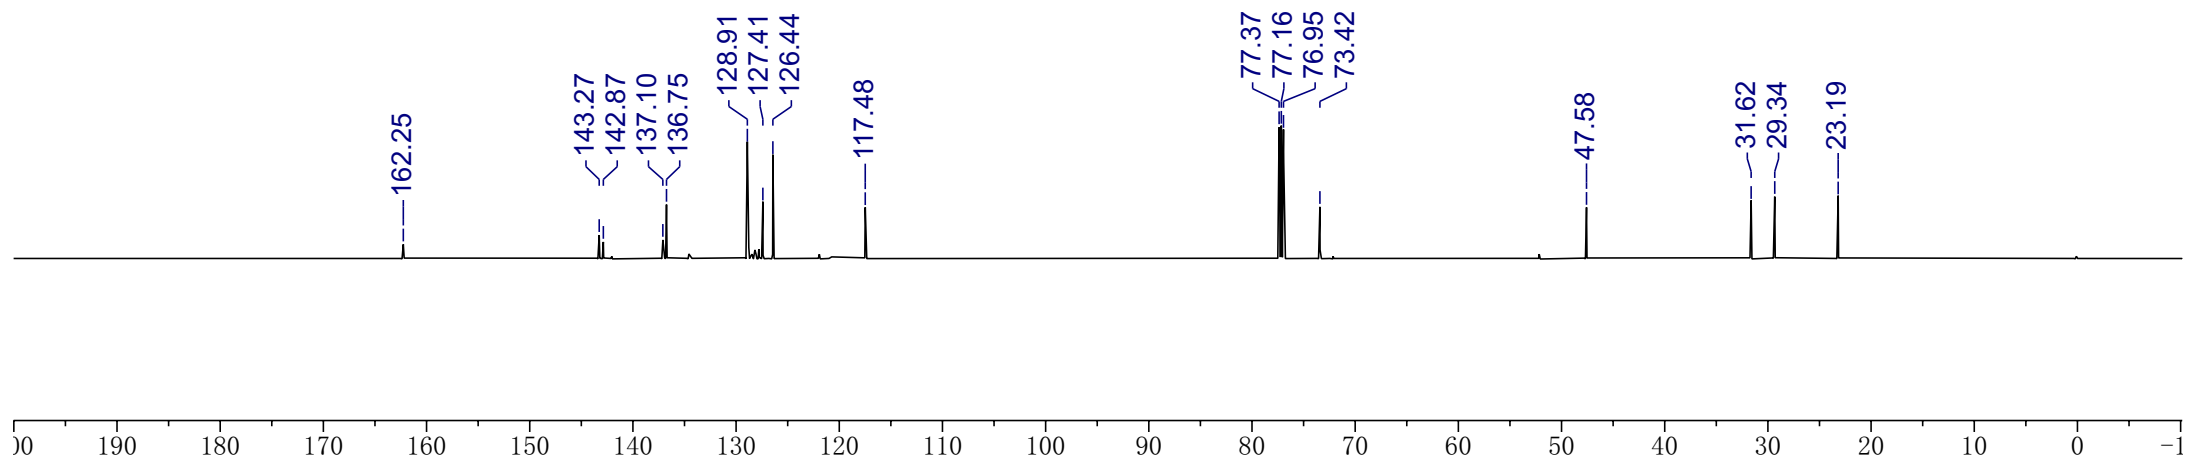



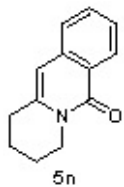

400 MHz, CDCl<sub>3</sub>

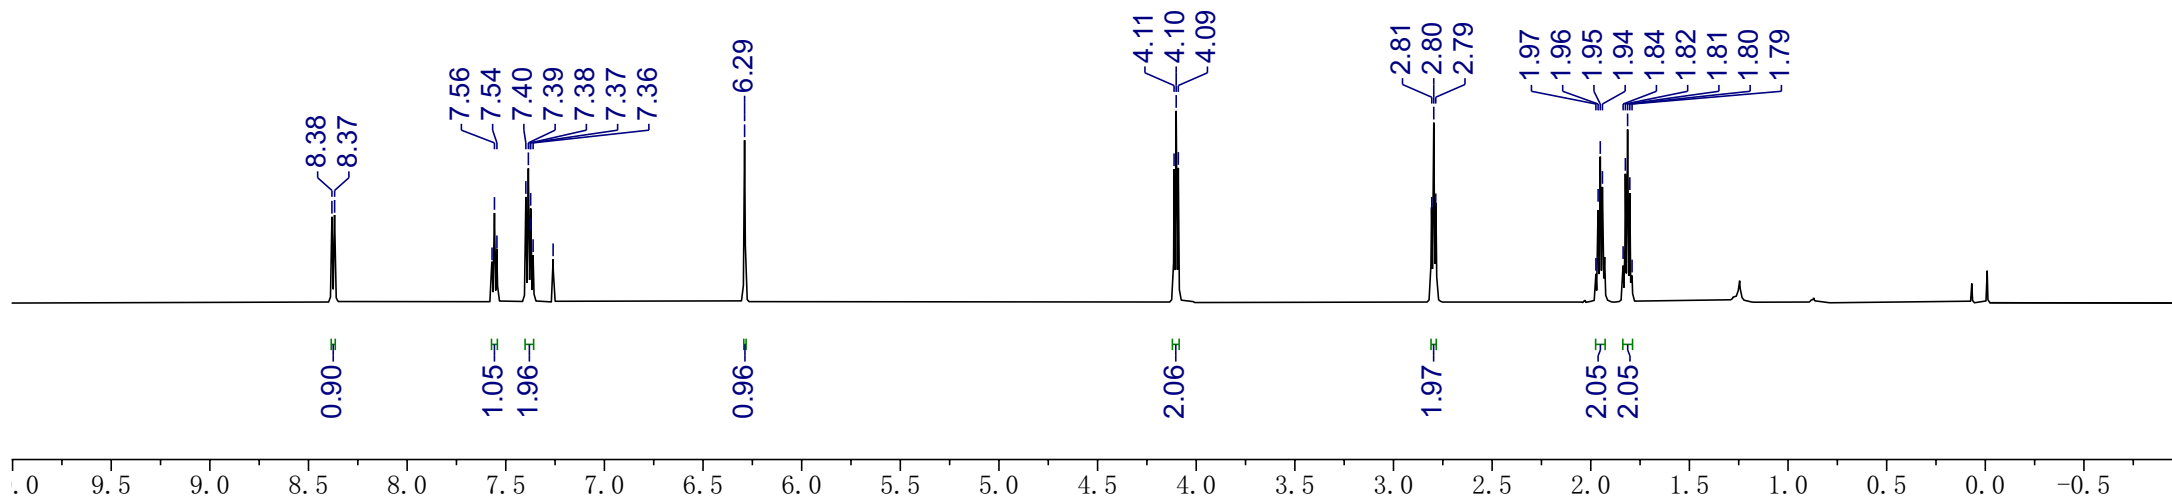



400 MHz, CDCl<sub>3</sub>

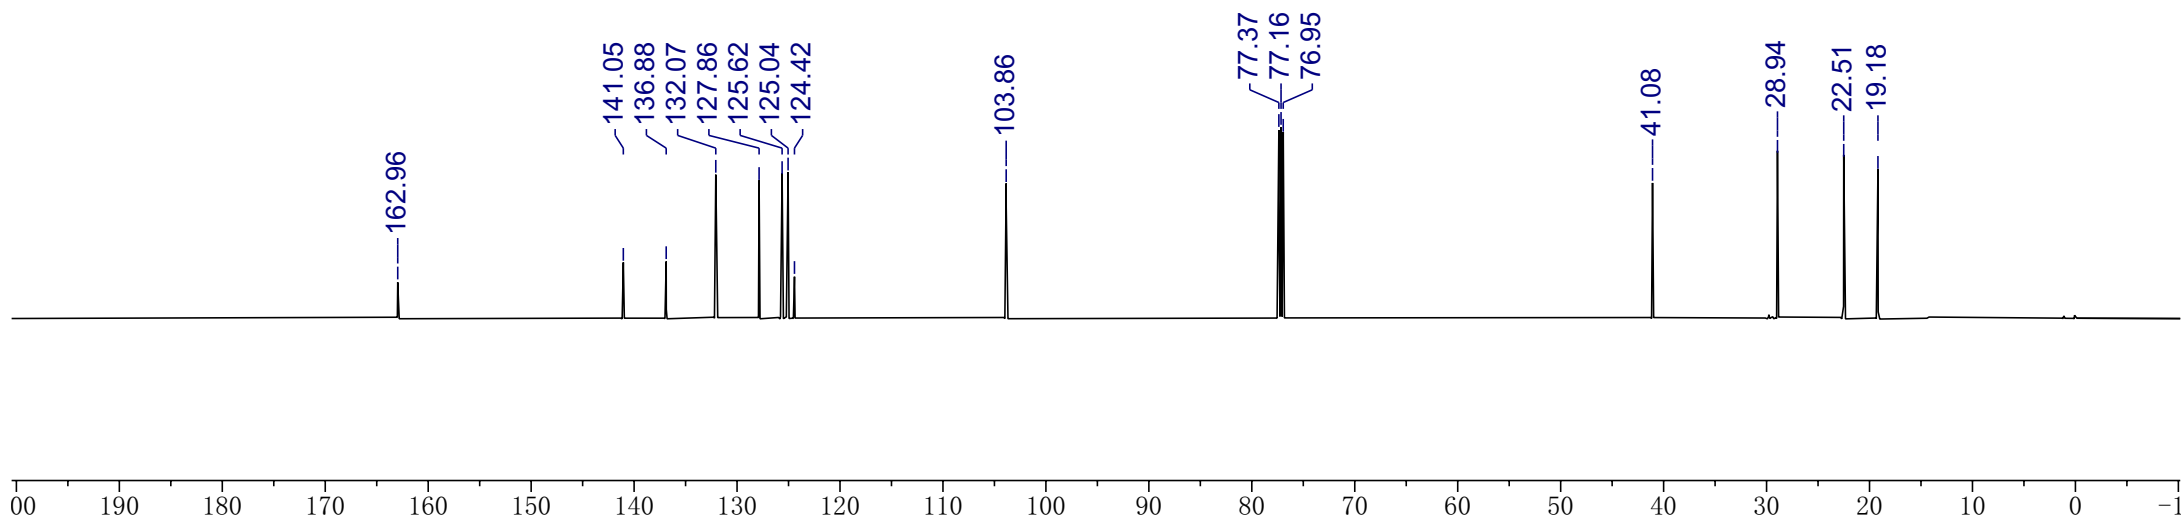

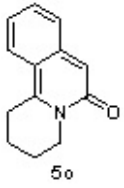

400 MHz, CDCl<sub>3</sub>

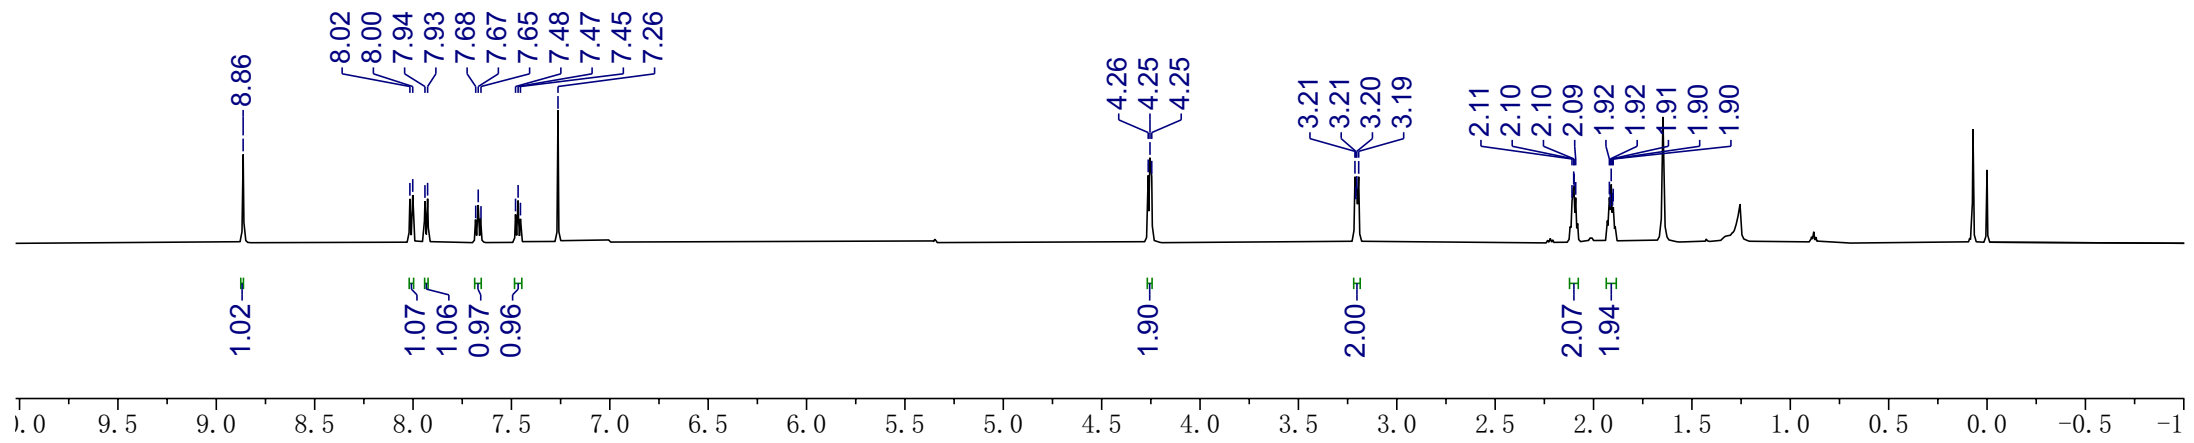

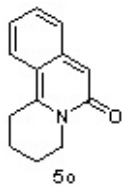

400 MHz, CDCl<sub>3</sub>

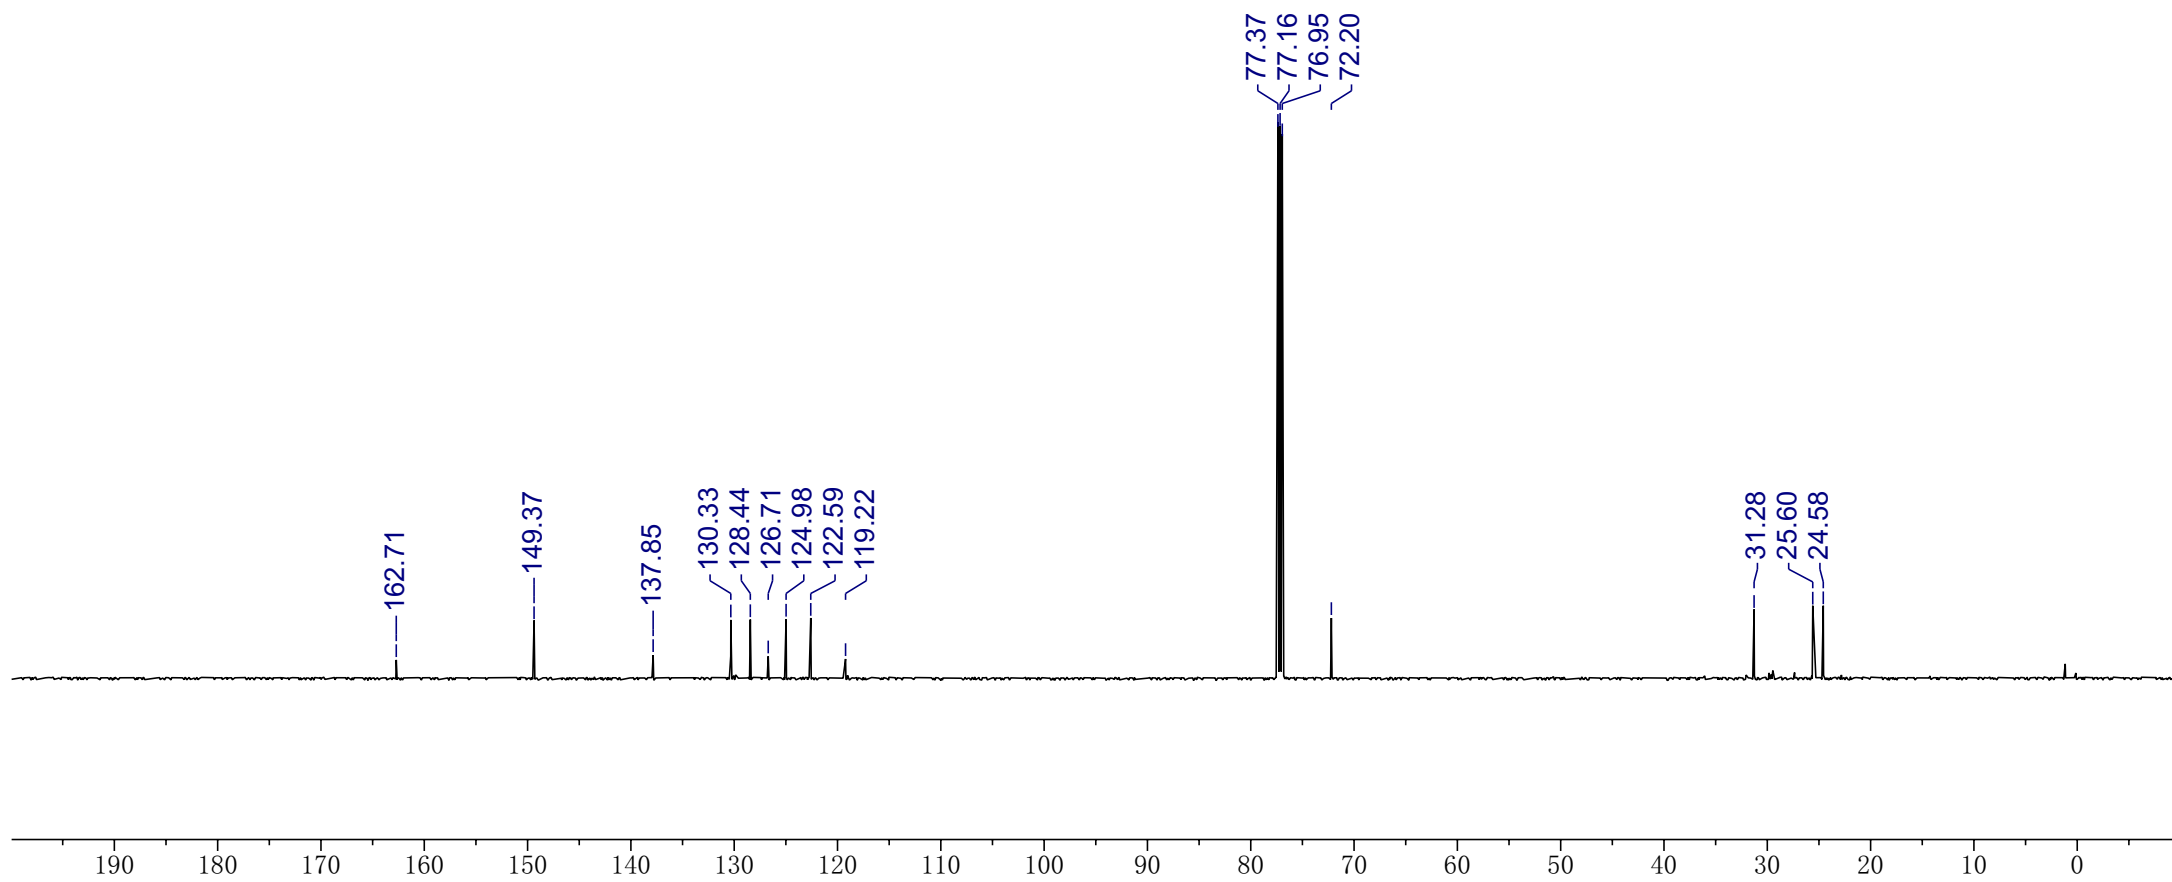

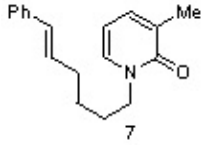

400 MHz, CDCl<sub>3</sub>

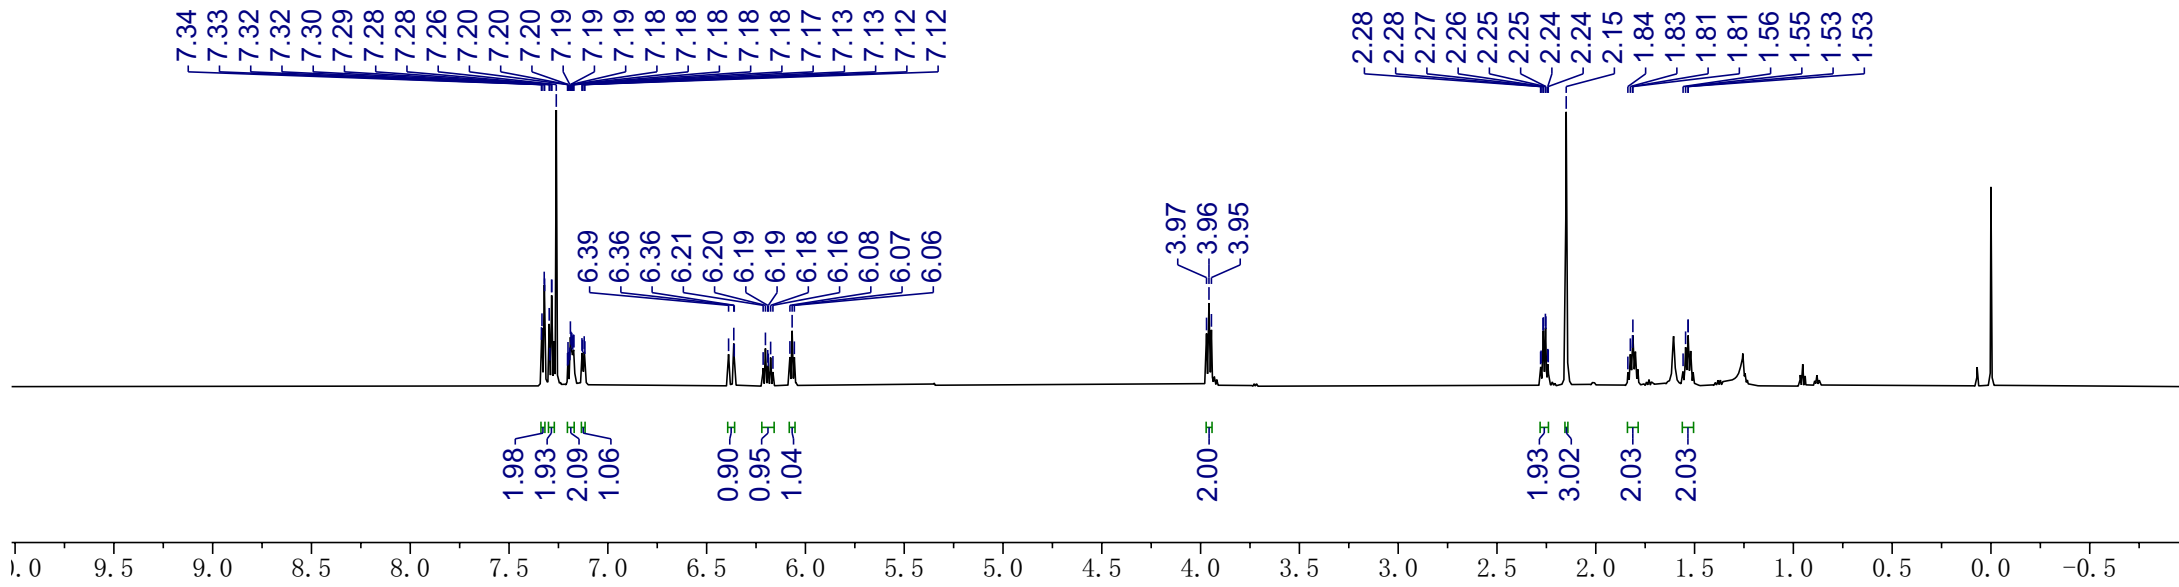

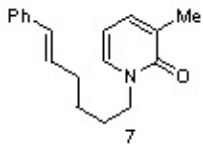

400 MHz, CDCl<sub>3</sub>

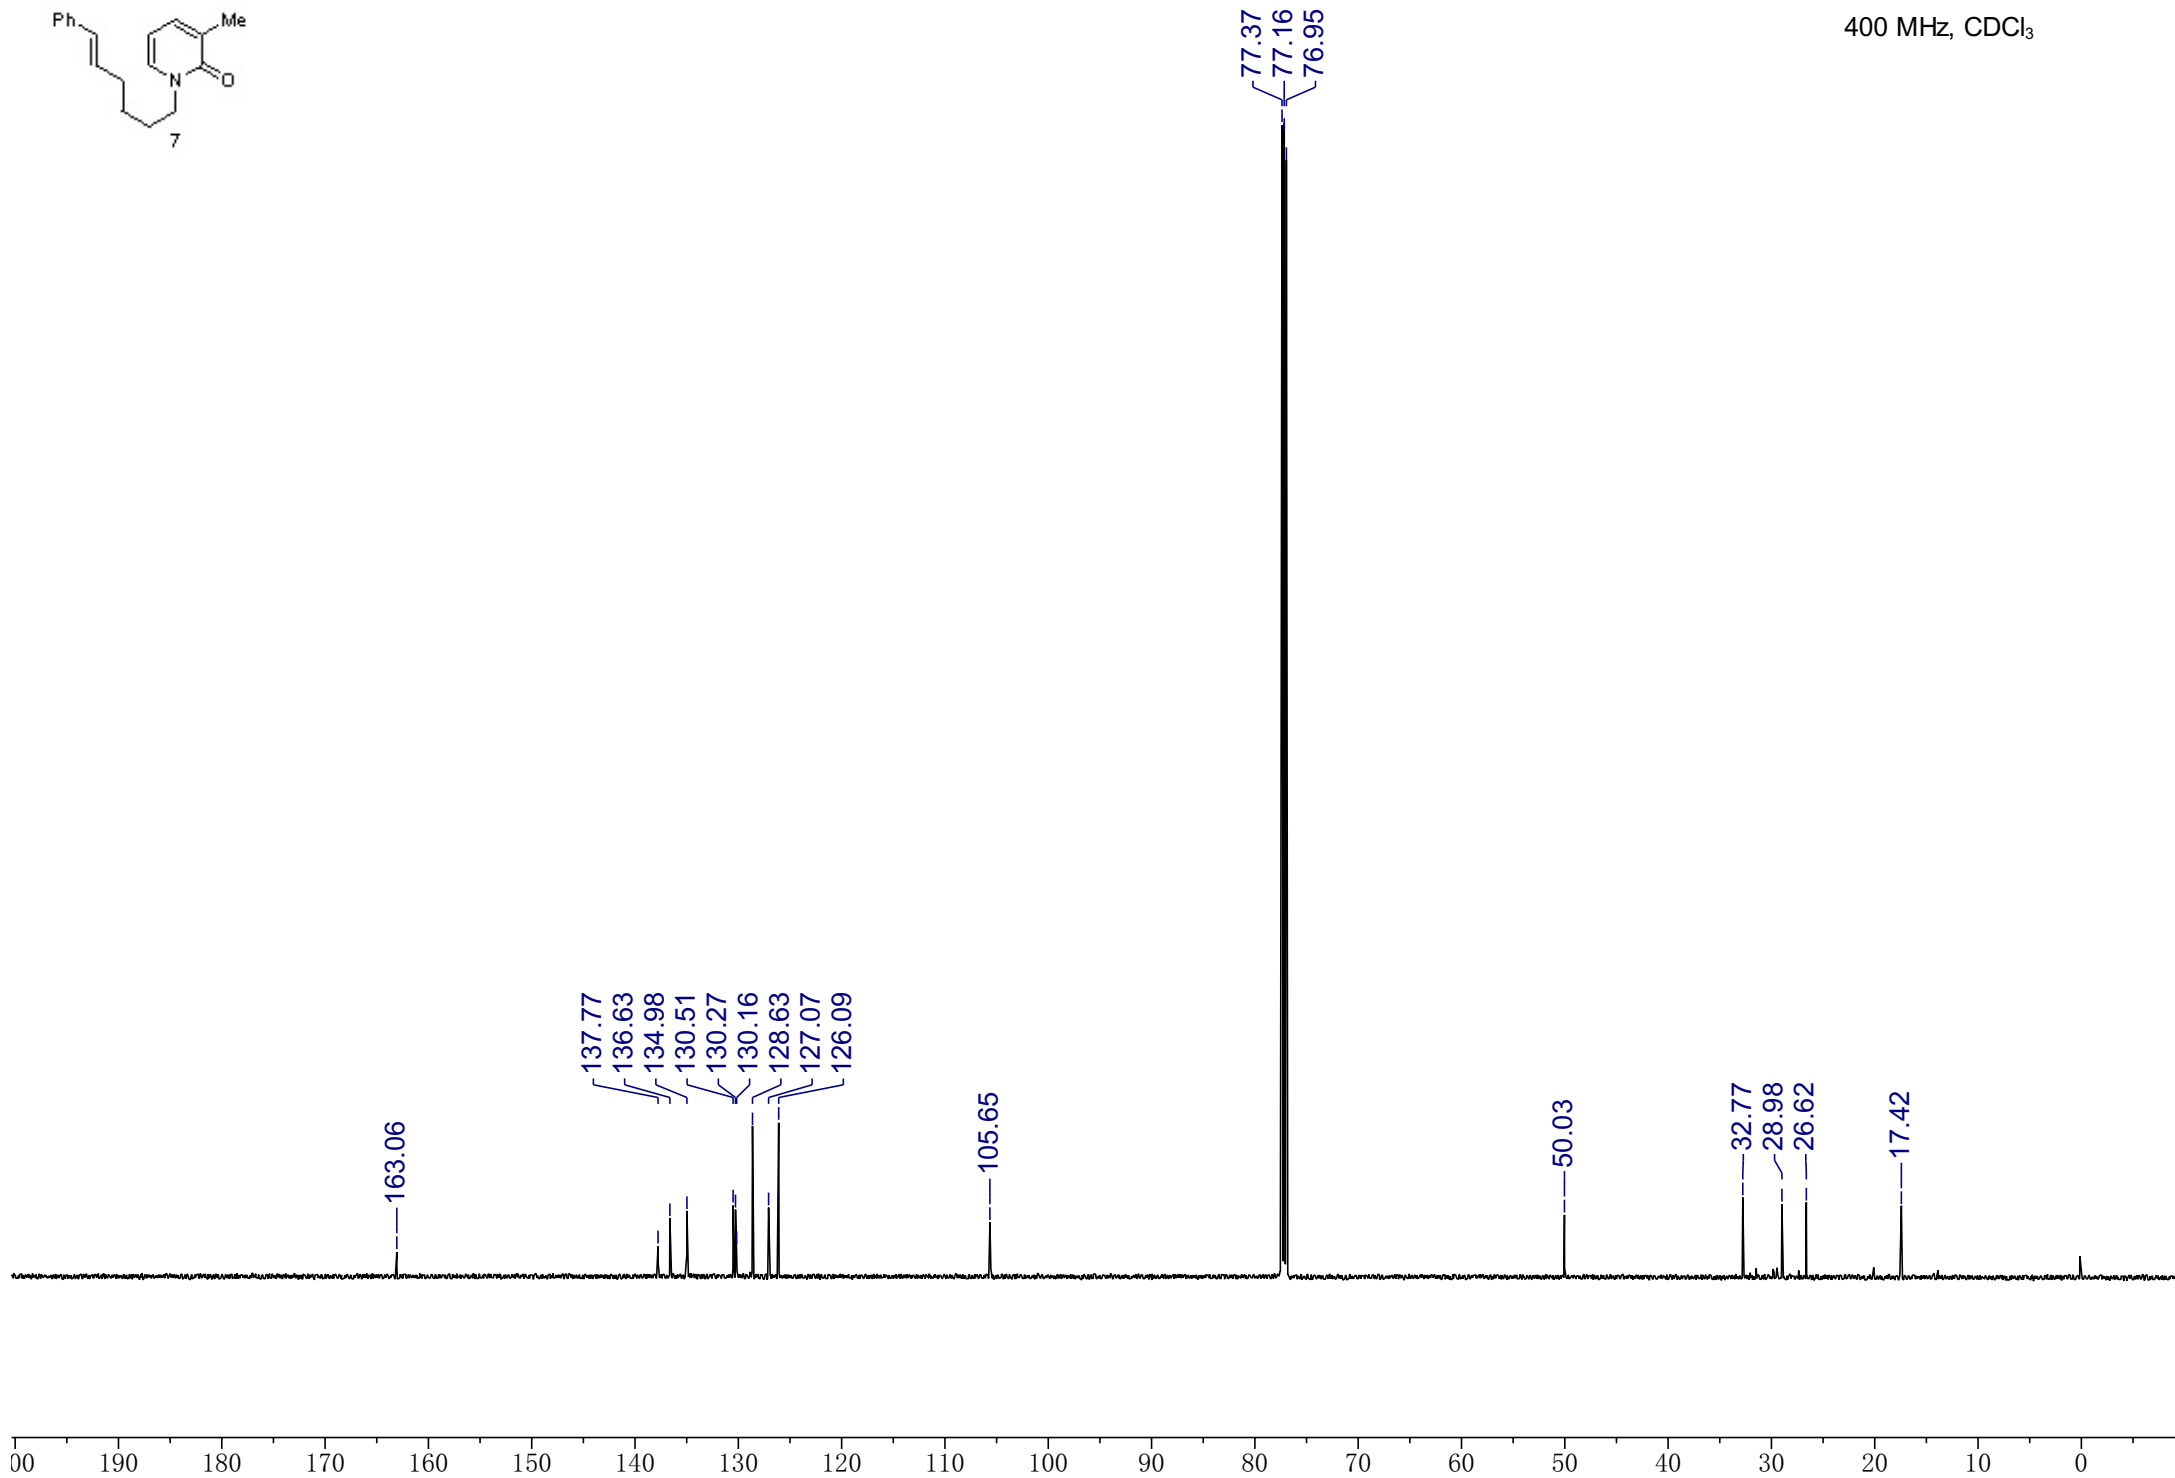

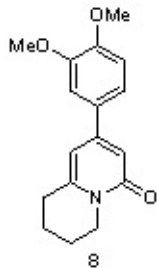

400 MHz, CDCl<sub>3</sub>

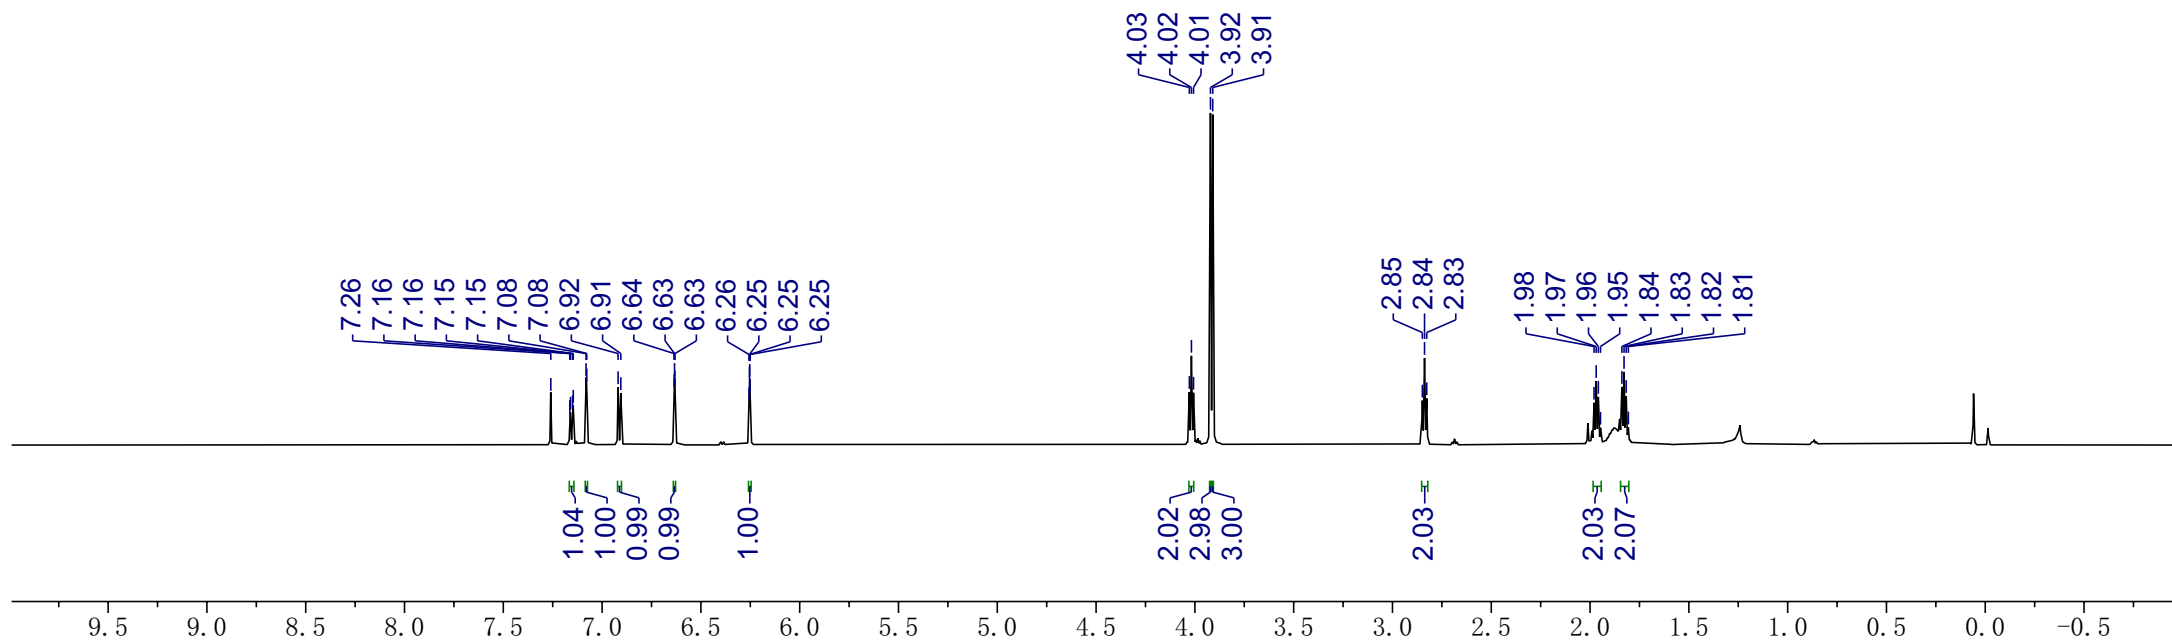

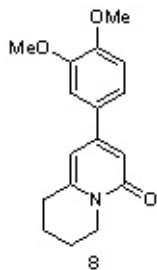

400 MHz, CDCl<sub>3</sub>

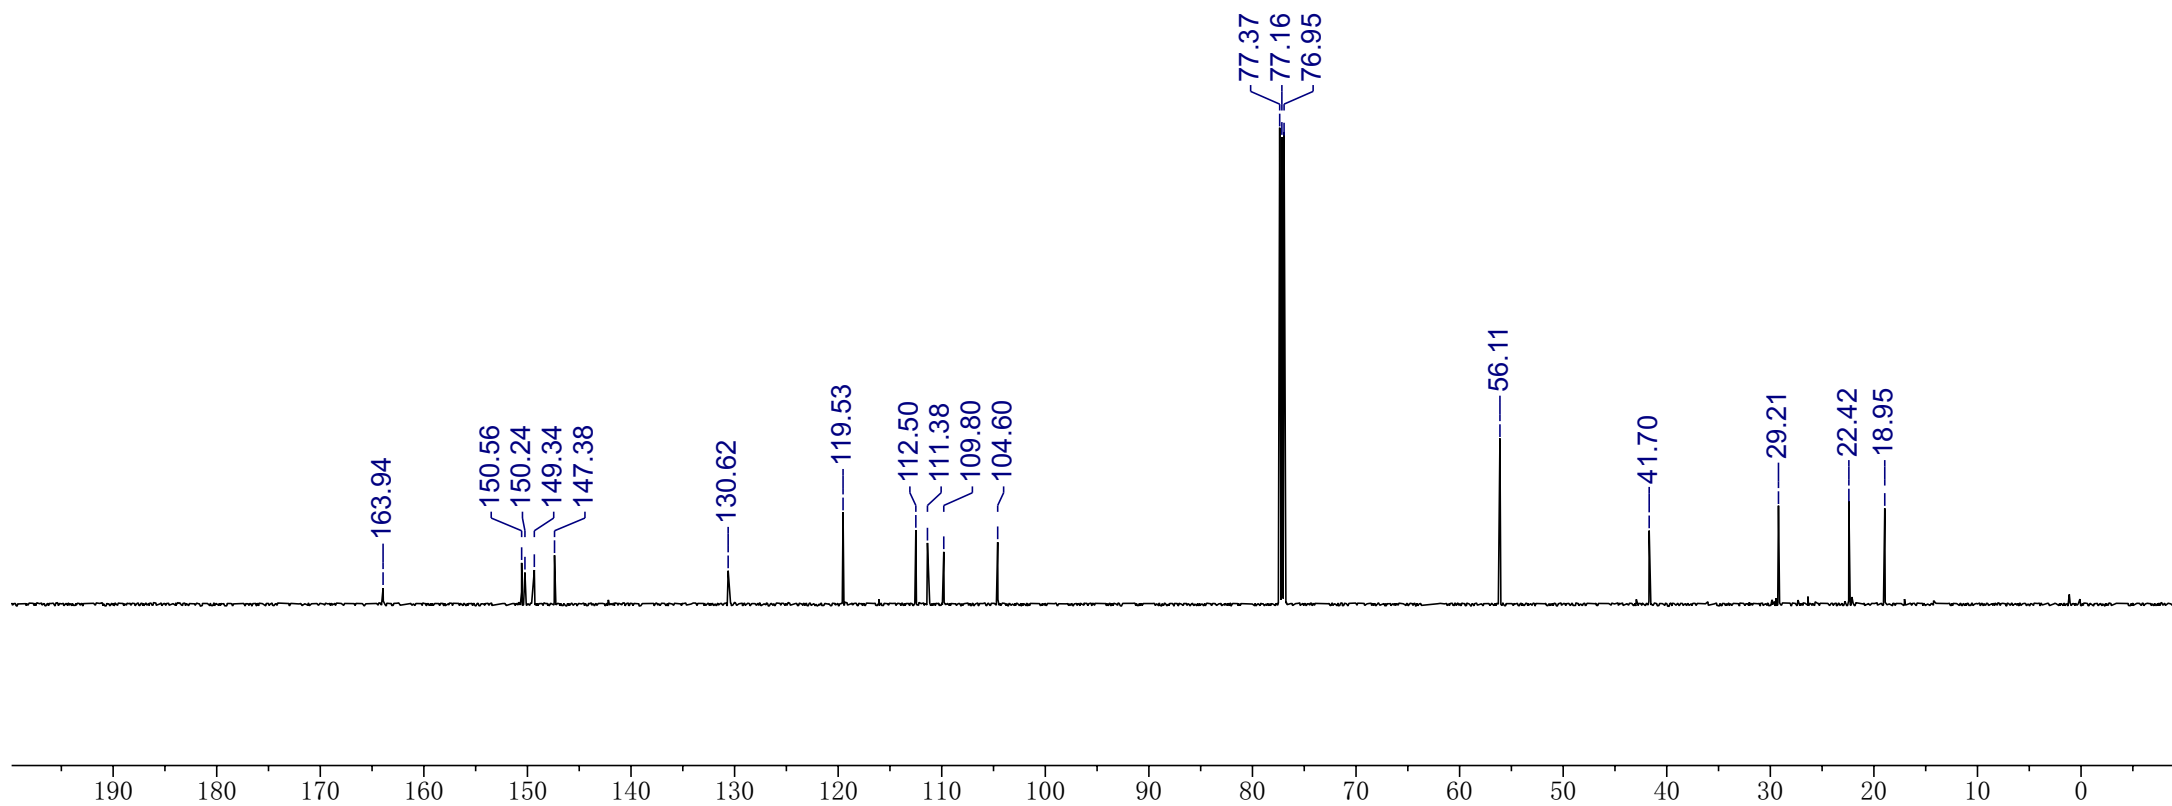



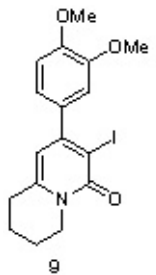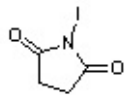

2.7 : 1

400 MHz, CDCl<sub>3</sub>

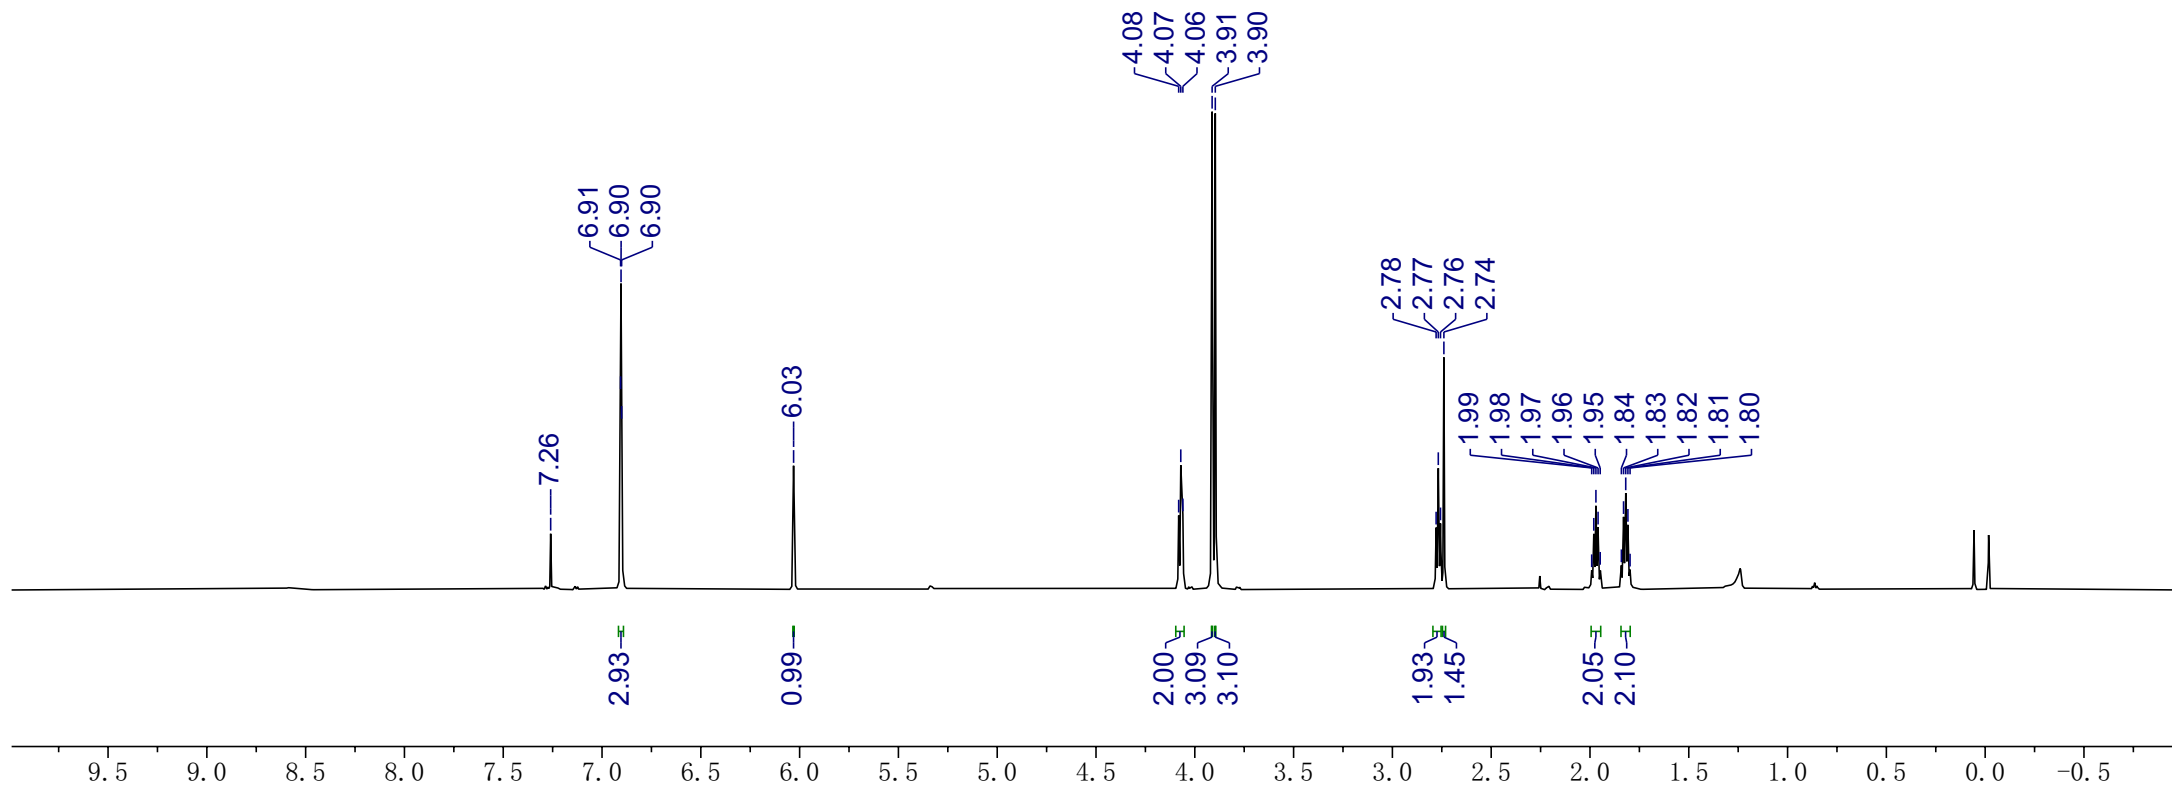

400 MHz, CDCl<sub>3</sub>

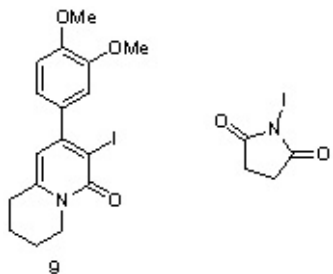

2.7 : 1

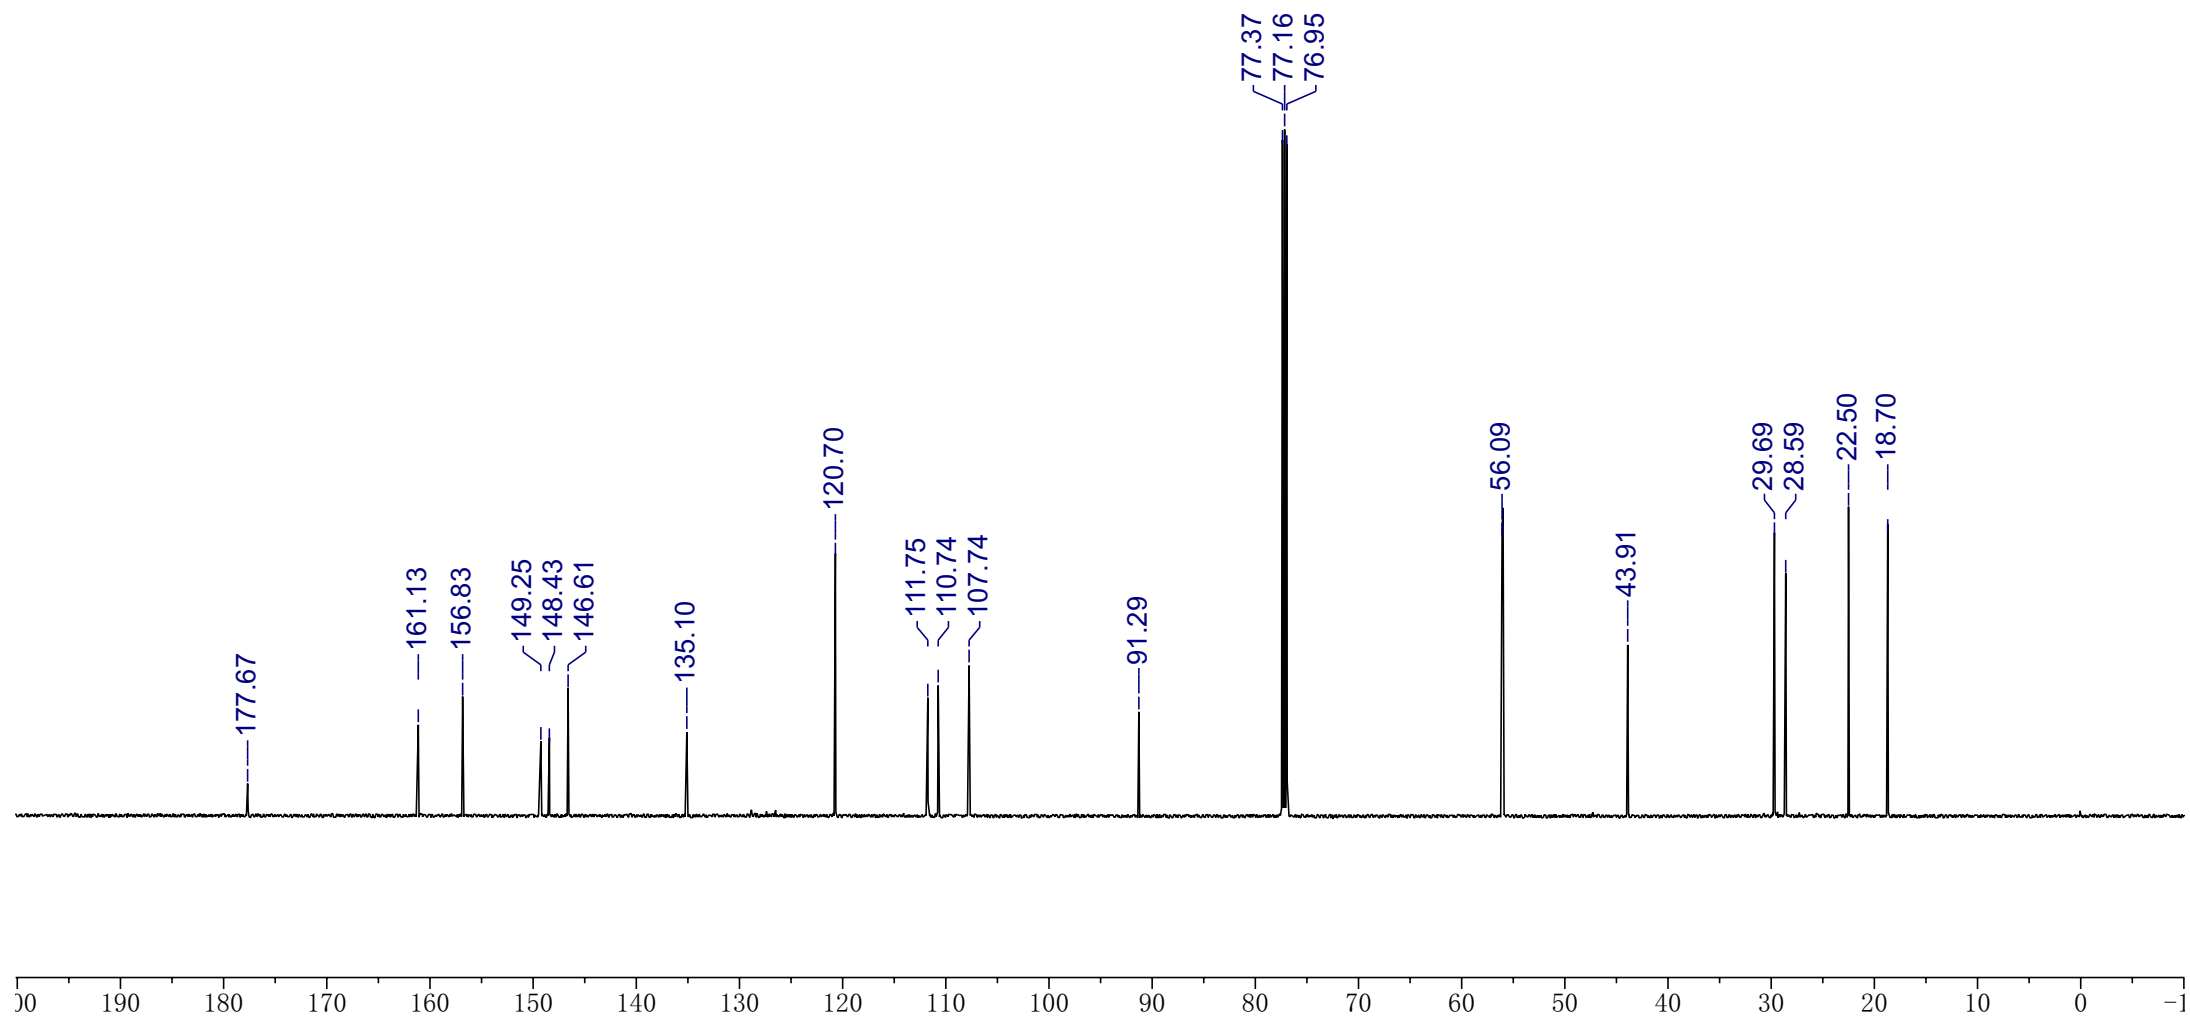

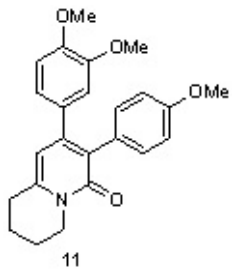

400 MHz, CDCl<sub>3</sub>

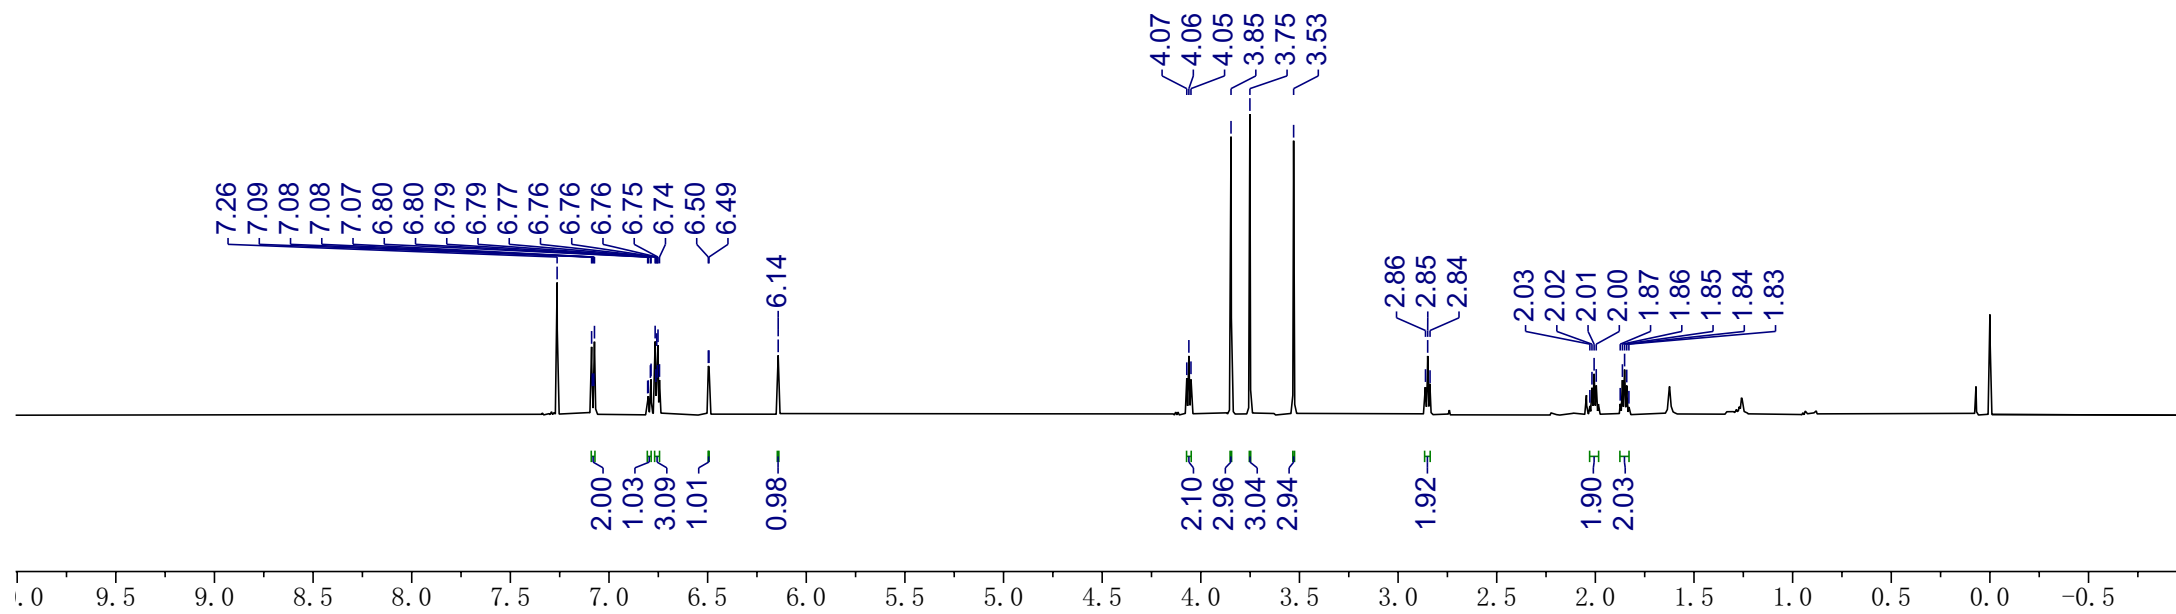



400 MHz, CDCl<sub>3</sub>

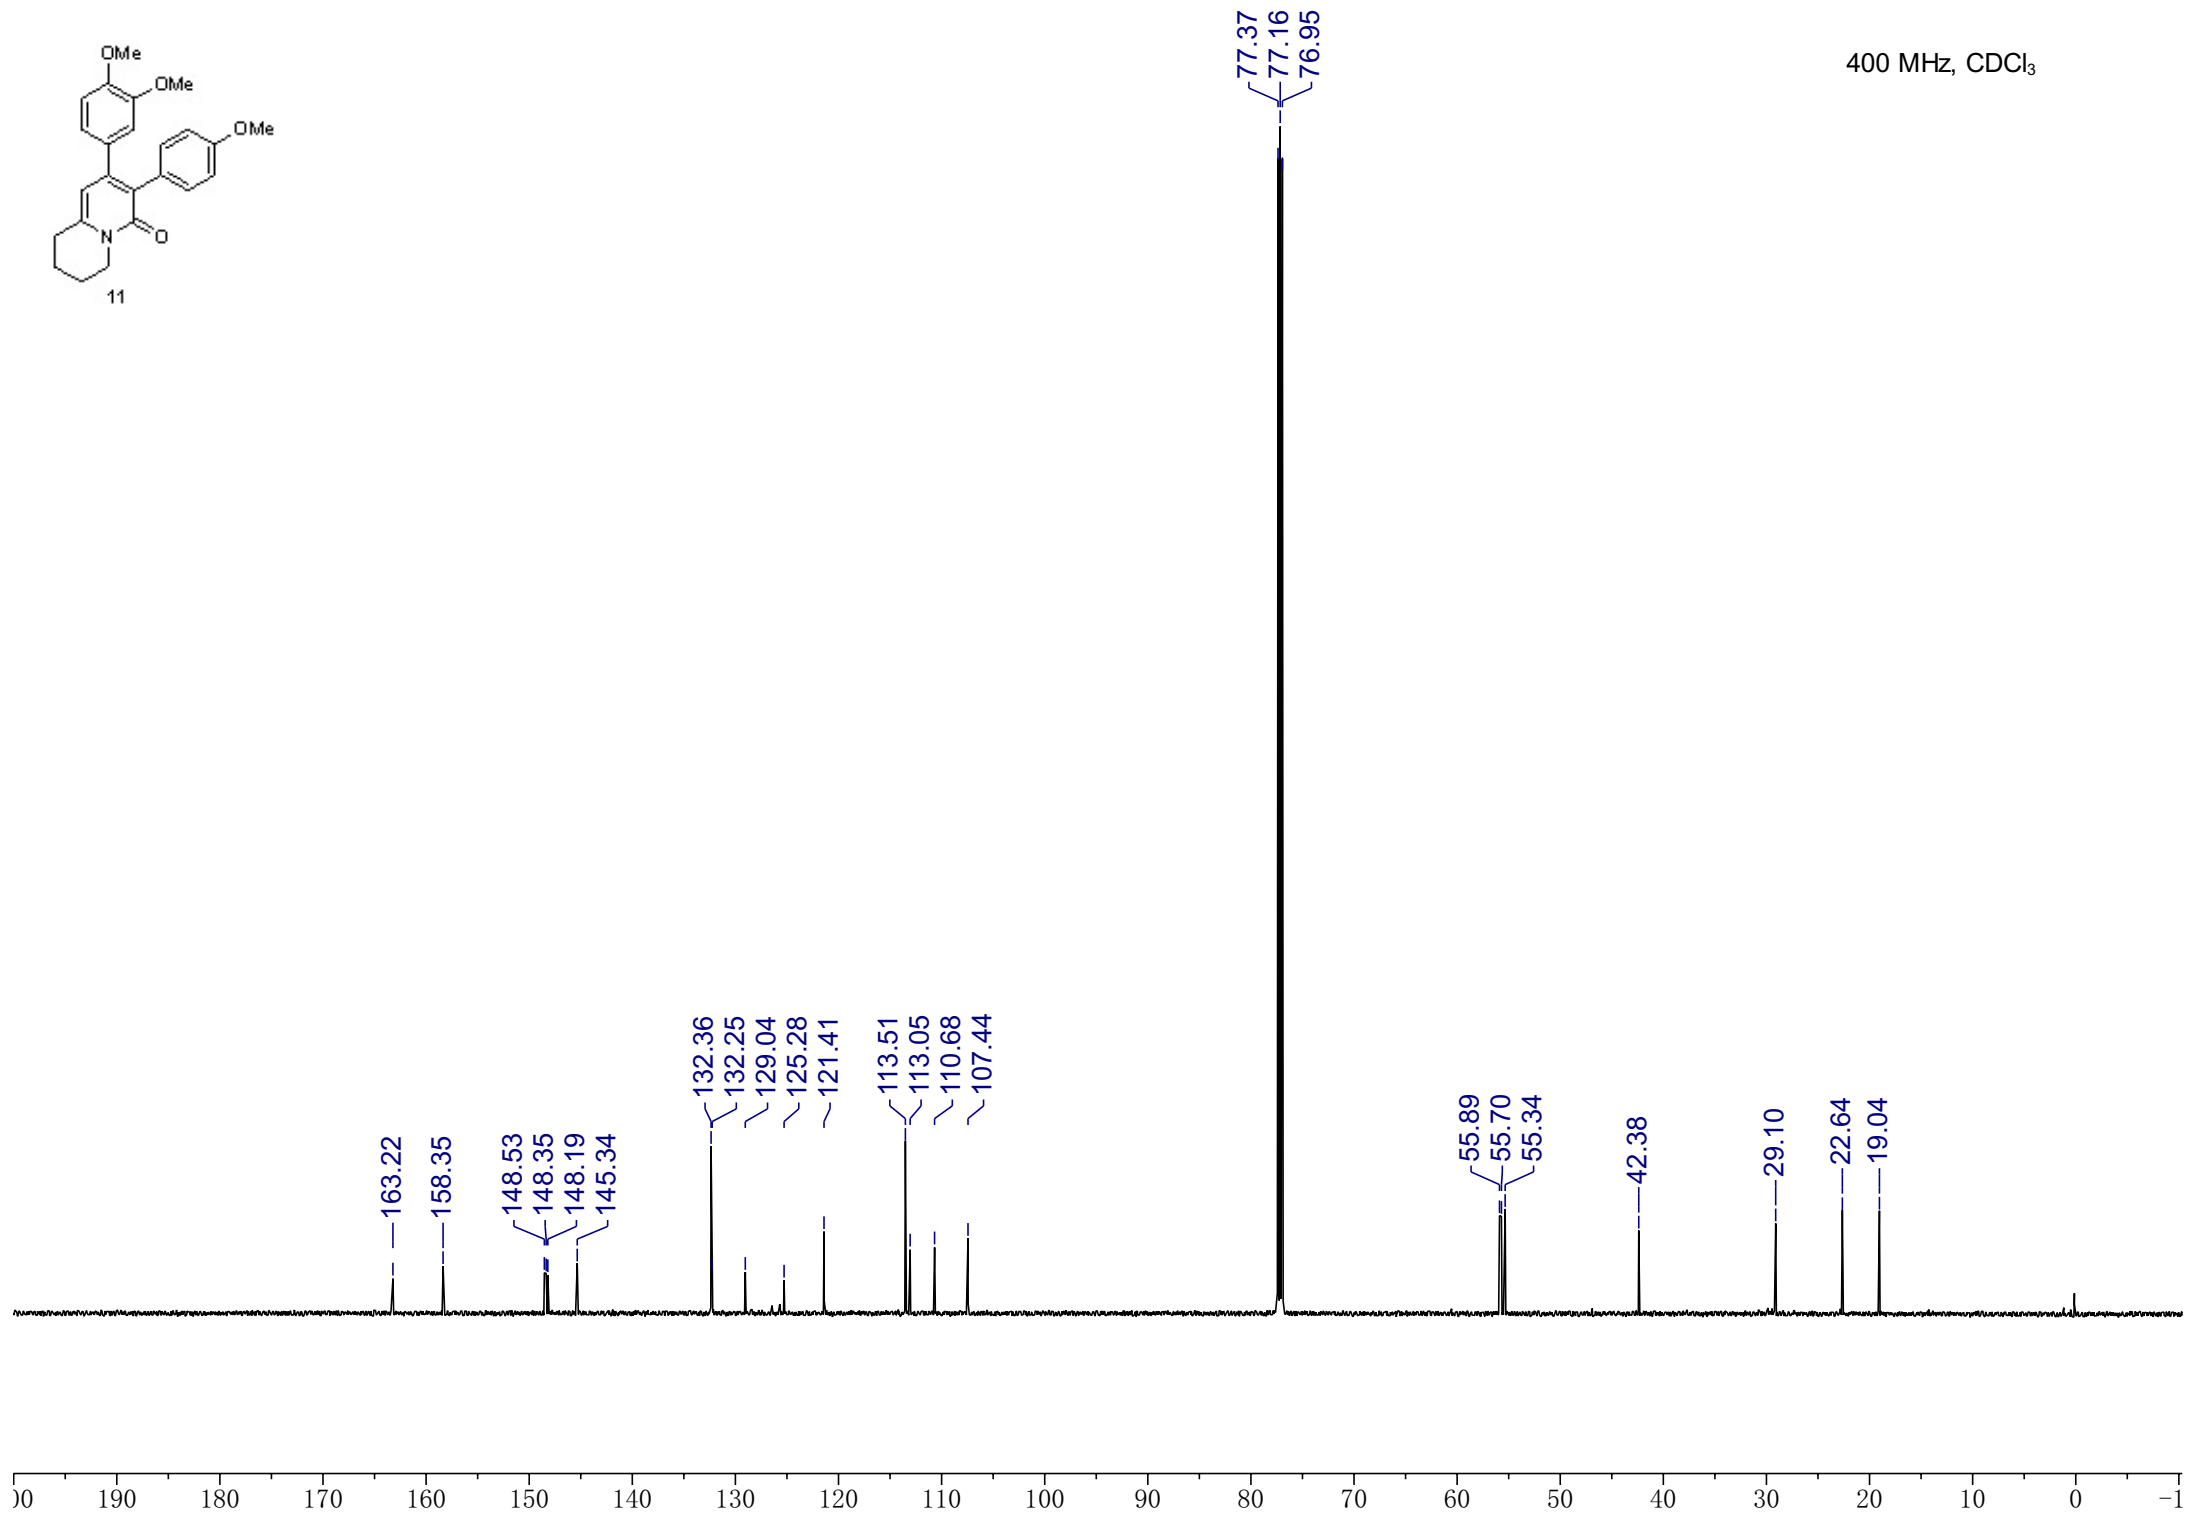

Supplement: d3qo02133e1.pdf [file d3qo02133e1.pdf]
